# Supplementary material for: Ruthenaelectro-catalyzed C–H phosphorylation: ortho to para position-selectivity switch
Source: PubMed Central journal article supplement (PMC11619359; doi:10.1039/d4sc06219a), 2024-11-29

## Supporting Information

### *Ruthenaelectro-Catalyzed C–H Phosphorylation: ortho to para Position- Selectivity Switch*

*Xue-Ya Gou,<sup>a‡</sup> João C. A. Oliveira,<sup>a‡</sup> Shan Chen,<sup>a</sup> Simon L. Homöller,<sup>a</sup> Sven Trienes,<sup>a</sup> Tristan von Münchow,<sup>a</sup> Bo-Sheng Zhang,<sup>a</sup> and Lutz Ackermann<sup>\*a</sup>*

Institut für Organische und Biomolekulare Chemie and Wöhler-Research Institute for Sustainable Chemistry (WISCh), Georg-August-Universität, Tammannstrasse 2, 37077 Göttingen, Germany

E-mail: [Lutz.Ackermann@chemie.uni-goettingen.de](mailto:Lutz.Ackermann@chemie.uni-goettingen.de)

‡These authors contributed equally.

#### Table of Contents

|                                                 |    |
|-------------------------------------------------|----|
| 1. General Experimental Details .....           | 2  |
| 2. Optimization of the Reaction Conditions..... | 3  |
| 3. General Procedure.....                       | 4  |
| 4. Mechanistic Studies .....                    | 6  |
| 5. X-ray Crystallographic Data .....            | 15 |
| 6. Computational Studies .....                  | 19 |
| 7. References.....                              | 49 |
| 8. Characterization Data.....                   | 51 |
| 9. NMR Spectroscopic Data.....                  | 77 |

## 1. General Experimental Details

Platinum electrodes (10 mm × 25 mm × 0.25 mm, 99.9%, obtained from ChemPur® Karlsruhe, Germany) and graphite felt (GF) electrodes (10 mm × 25 mm × 6 mm, SIGRACELL® GFA 6 EA, obtained from SGL Carbon, Wiesbaden, Germany) were connected using stainless steel adapters. Electrocatalysis was performed using a ROHDE&SCHWARZ HMP4040 potentiostat.

Solvents for column chromatography and extraction (EtOAc, *n*-hexane, MeOH, DCM) were distilled prior to their use. Routine TLC analysis was carried out on aluminium sheets coated with silica gel 60 F254, 0.2 mm thickness. Plates were analyzed using a 254 nm UV lamp. Chromatography was carried out on Merck silica gel 60 (40–63 μm). All starting materials, reagents and solvents were purchased from commercial suppliers (Aldrich, Alfa, TCI, Daicel, etc.) and used as supplied unless otherwise stated.

NMR spectra were recorded on Bruker-300 MHz spectrometer or Bruker-400 MHz spectrometer. Chemical shifts ( $\delta$ ) are given in ppm relative to TMS. The residual solvent signals were used as references and the chemical shifts converted to the TMS scale (CDCl<sub>3</sub>:  $\delta_{\text{H}} = 7.26$  ppm,  $\delta_{\text{C}} = 77.00$  ppm). Data for <sup>1</sup>H NMR are reported as follows: chemical shift ( $\delta$ ), multiplicity (s = singlet, d = doublet, t = triplet, q = quartet, p = quintet, m = multiplet, dd = doublet of doublets, ddd = doublet of double doublets, dt = doublet of triplets), coupling constants *J* are reported in Hertz (Hz).

MS: EI-MS were recorded with Finnigan MAT 95, 70 eV and Finnigan LCQ; High resolution mass spectrometry (HR-MS) with APEX IV 7T FTICR; ESI-MS were recorded with Bruker *Daltonics maXis* (ESI-QTOF-MS), Bruker *Daltonics micrOTOF* (ESI-TOF-MS) or Thermo Scientific *LTQ Orbitrap XL* (ESI-Orbitrap-MS). All IR spectra were recorded on a Bruker FT-IR Alpha-P device or on a Thermo Scientific Nicolet iS5 device equipped with an iD7 ATR detector and were recorded in the range from 4000 to 400 cm<sup>-1</sup>. CV studies were performed using a Metrohm Autolab PGSTAT204 workstation and Nova 2.1 software.

Headspace analysis was performed on an Agilent 7890B GC System using a Thermal Conductivity Detector and a 5 Å MS column. The gas evolution study was conducted using the GasMess-System (LIKAT Rostock and MesSen Nord GmbH).

## 2. Optimization of the Reaction Conditions

**Table S1.** Reaction optimization for *ortho*-C–H phosphorylation.<sup>a</sup>

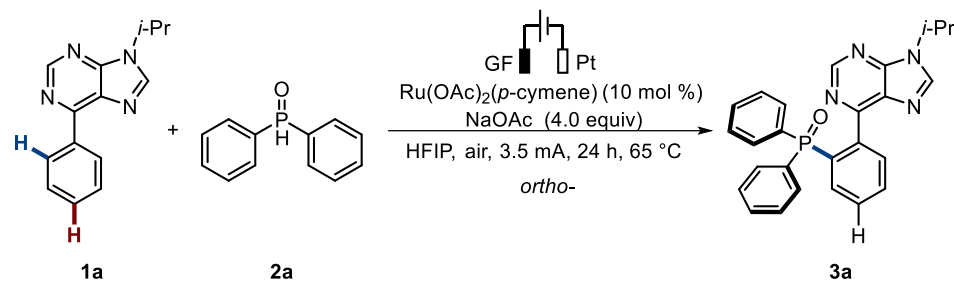

| Entry | Deviation from standard conditions                                                                                                 | Yield <sup>b</sup> |
|-------|------------------------------------------------------------------------------------------------------------------------------------|--------------------|
| 1     | None                                                                                                                               | 73                 |
| 2     | TEF / CH <sub>3</sub> CN / MeOH / DMA as solvent                                                                                   | 65/-/-             |
| 3     | 35°C / 45° C                                                                                                                       | 19/35              |
| 4     | GF(+) / GF(-), Pt(+) / GF(-), RVC(+) / Pt(-) as electrode                                                                          | 32/23/63           |
| 5     | <i>n</i> -Bu <sub>4</sub> NOAc, NaPF <sub>6</sub> , <i>n</i> -Bu <sub>4</sub> NBF <sub>4</sub> , LiClO <sub>4</sub> as electrolyte | 70/55/34/65        |
| 6     | 1 mA 72 h, 2 mA 36 h, 4 mA 18 h                                                                                                    | 49/65/61           |
| 7     | No [Ru(OAc) <sub>2</sub> ( <i>p</i> -cymene)]                                                                                      | 0                  |
| 8     | No electricity                                                                                                                     | 0                  |

<sup>a</sup>**Reaction conditions A:** Undivided cell, GF anode, Pt cathode, **1a** (0.3 mmol, 1.0 equiv), **2a** (4.0 equiv), [Ru(OAc)<sub>2</sub>(*p*-cymene)] (10 mol %), NaOAc (4.0 equiv), HFIP (3.0 mL), electrolyte (0.1 M), air, 65 °C, 3.5 mA, 24 h. <sup>b</sup>Isolated yields.

**Table S2.** Reaction optimization for *para*-C–H phosphorylation.<sup>a</sup>

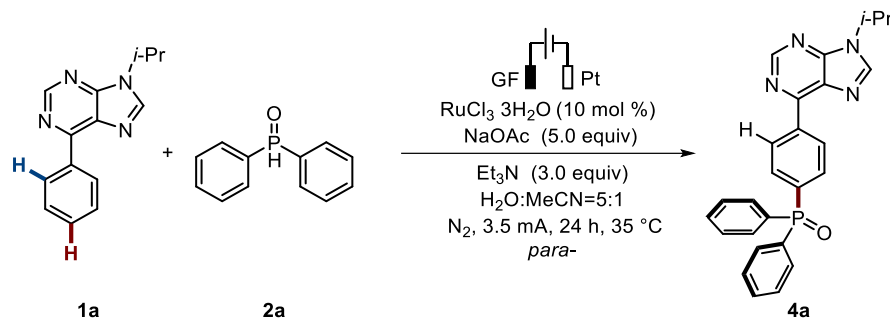

| Entry | Deviation from standard conditions                                                                                                                                               | Yield <sup>b</sup> |
|-------|----------------------------------------------------------------------------------------------------------------------------------------------------------------------------------|--------------------|
| 1     | None                                                                                                                                                                             | 82                 |
| 2     | H <sub>2</sub> O / CH <sub>3</sub> CN / PhMe / MeOH as solvent                                                                                                                   | 25/12/-/-          |
| 3     | 55°C / 25°C                                                                                                                                                                      | 72/67              |
| 4     | GF(+) / GF(-), Pt(+) / GF(-), RVC(+) / Pt(-) as electrode                                                                                                                        | 5/8/77             |
| 5     | <i>n</i> -Bu <sub>4</sub> NOAc, NaPF <sub>6</sub> , <i>n</i> -Bu <sub>4</sub> NBF <sub>4</sub> , Et <sub>4</sub> NCl, <i>n</i> -Bu <sub>4</sub> NClO <sub>4</sub> as electrolyte | 80/61/39/79/21     |
| 6     | 2 mA 36 h, 4 mA 18 h, 6 mA 12 h                                                                                                                                                  | 65/76/59           |
| 7     | No [RuCl <sub>3</sub> ·3H <sub>2</sub> O]                                                                                                                                        | 58                 |
| 8     | No electricity                                                                                                                                                                   | 0                  |

<sup>a</sup>**Reaction conditions B:** Undivided cell, GF anode, Pt cathode, **1a** (0.3 mmol, 1.0 equiv), **2a** (4.0 equiv), [RuCl<sub>3</sub>·3H<sub>2</sub>O] (10 mol %), NaOAc (5.0 equiv), Et<sub>3</sub>N (3.0 equiv), MeCN:H<sub>2</sub>O = (0.5:2.5 mL), electrolyte (0.1 M), N<sub>2</sub>, 35 °C, 3.5 mA, 24 h. <sup>b</sup>Isolated yields.

### 3. General Procedure

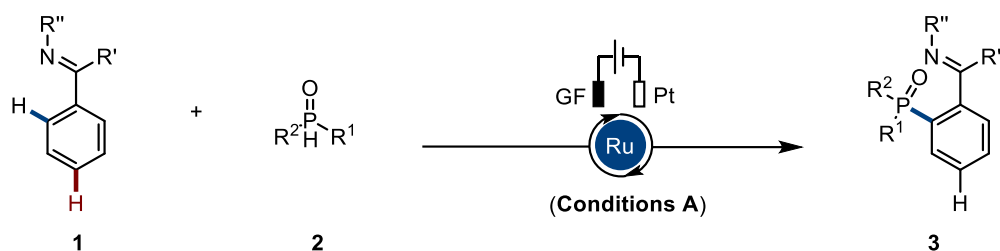

#### Conditions A:

Under air atmosphere, an undivided cell was charged with **1** (0.3 mmol, 1.0 equiv), **2** (1.2 mmol, 4.0 equiv), [Ru(OAc)<sub>2</sub>(*p*-cymene)] (10 mol %), NaOAc (4.0 equiv), HFIP (3.0 mL), and equipped with a graphite felt (GF) anode (10 mm × 25 mm × 6 mm) and a platinum (Pt) cathode (10 mm × 25 mm × 0.25 mm). The resulting light-red suspension was stirred vigorously at room temperature for 10 minutes, and then placed in a pre-heated oil bath at 65 °C for electrolysis under a constant current of 3.5 mA for 24 hours. After the reaction was completed, the electrodes were carefully washed with DCM (3 × 10 mL) and MeOH (3 × 10 mL). The combined mixture was initially purified by flash column chromatography on silica gel (DCM/MeOH = 30/1-10/1) to afford the crude product, which was further purified by chromatography on silica gel to afford the corresponding product **3**.

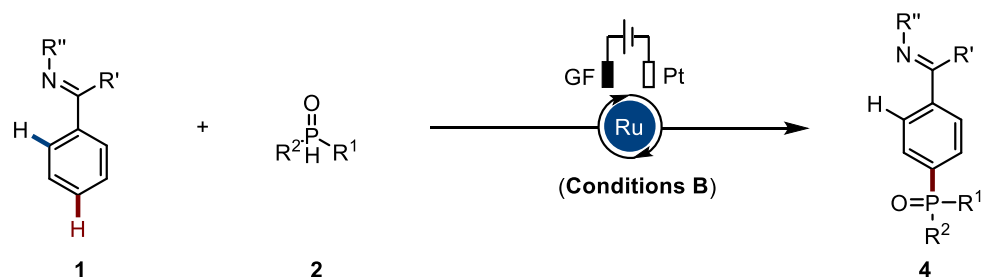

#### Conditions B:

Under N<sub>2</sub> atmosphere, an undivided cell was charged with **1** (0.3 mmol, 1.0 equiv), **2** (1.2 mmol, 4.0 equiv), [RuCl<sub>3</sub>·3H<sub>2</sub>O] (10 mol %), NaOAc (5.0 equiv), Et<sub>3</sub>N (3.0 equiv), MeCN: H<sub>2</sub>O = (0.5 mL: 2.5 mL), and equipped with a graphite felt (GF) anode (10 mm × 25 mm × 6 mm) and a platinum (Pt) cathode (10 mm × 25 mm × 0.25 mm). The resulting black suspension was stirred vigorously at room temperature for 10 minutes, and then placed in a pre-heated oil bath at 35 °C for electrolysis under a constant current of 3.5 mA for 24 hours. After the reaction was completed, the electrodes were carefully washed with DCM (3 × 10 mL) and MeOH (3 × 10 mL). The combined mixture was initially purified by flash column chromatography on silica gel (DCM/MeOH = 30/1-10/1) to afford the crude product, which was further purified by chromatography on silica gel to afford the corresponding product **4**.



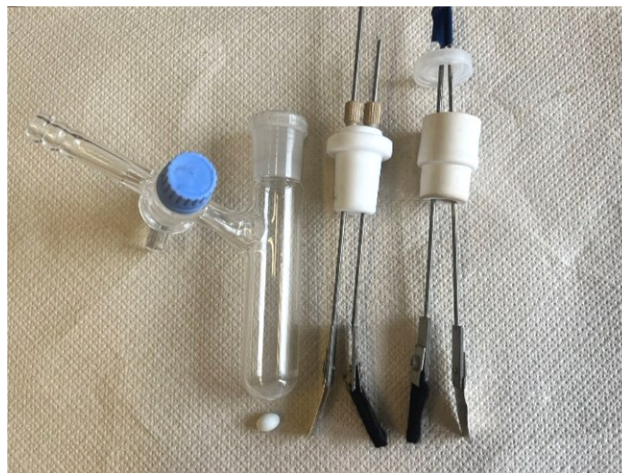

**Figure S1.** Picture of the electrochemical cell, stirring bar, and teflon cap with a graphite felt (GF) anode and a platinum (Pt) cathode

## 4. Mechanistic Studies

### 1) Radical trapping experiments for the *ortho*-C–H phosphorylation

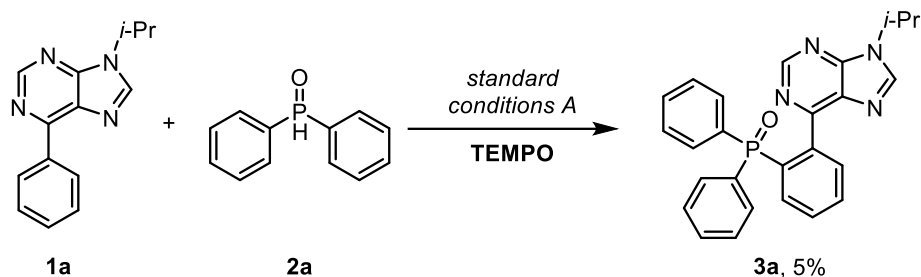

Following standard procedure A using **1a** (0.3 mmol, 1.0 equiv), **2a** (1.2 mmol, 4.0 equiv), [Ru(OAc)<sub>2</sub>(*p*-cymene)] (10 mol %), NaOAc (4.0 equiv), **TEMPO** (1.2 mmol, 4.0 equiv), HFIP (3.0 mL). After the reaction was completed, the residue was purified with column chromatography on silica gel to give the compound **3a** (6.5 mg, 5%).

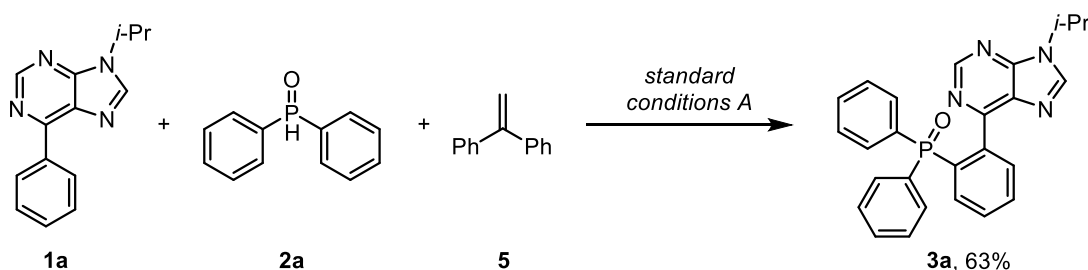

Following standard procedure A using **1a** (0.3 mmol, 1.0 equiv), **2a** (1.2 mmol, 4.0 equiv), [Ru(OAc)<sub>2</sub>(*p*-cymene)] (10 mol %), NaOAc (4.0 equiv), **5** (1.2 mmol, 4.0 equiv), HFIP (3.0 mL). After the reaction was completed, the residue was purified with column chromatography on silica gel to give the compound **3a** (82.8 mg, 63%).

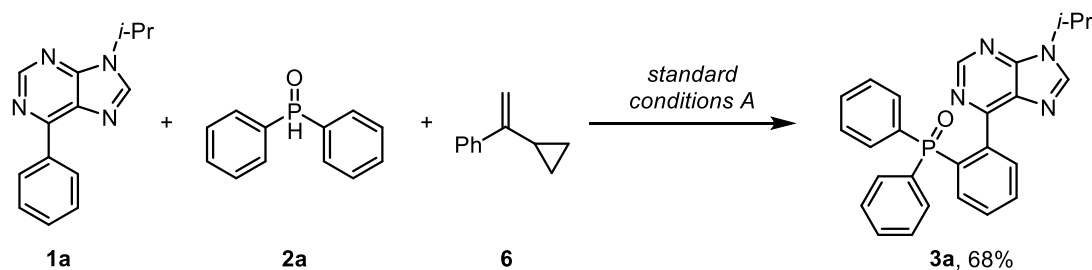

Following standard procedure A using **1a** (0.3 mmol, 1.0 equiv), **2a** (1.2 mmol, 4.0 equiv), [Ru(OAc)<sub>2</sub>(*p*-cymene)] (10 mol %), NaOAc (4.0 equiv), **6** (1.2 mmol, 4.0 equiv), HFIP (3.0 mL). After the reaction was completed, the residue was purified with column chromatography on silica gel to give the compound **3a** (89.5 mg, 68%).

### 2) Radical trapping experiments for the *para*-C–H phosphorylation

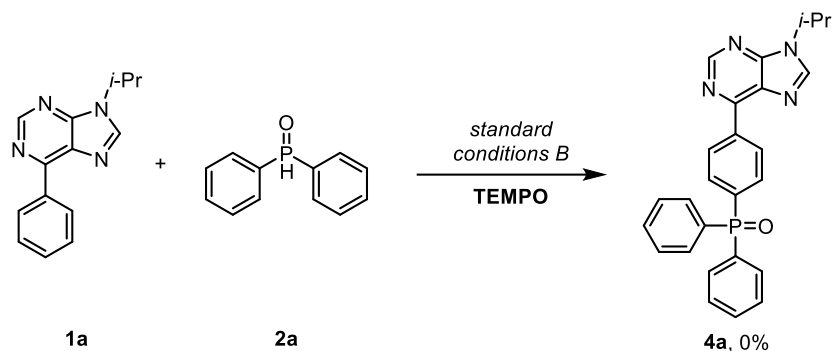

Following standard procedure B using **1a** (0.3 mmol, 1.0 equiv), **2a** (1.2 mmol, 4.0 equiv), [RuCl<sub>3</sub>·3H<sub>2</sub>O] (10 mol %), NaOAc (5.0 equiv), Et<sub>3</sub>N (3.0 equiv), **TEMPO** (1.2 mmol, 4.0 equiv), MeCN: H<sub>2</sub>O = (0.5 mL: 2.5 mL). After the reaction was completed, the TLC and GC-MS were employed to observe the result, no desired product had been observed.

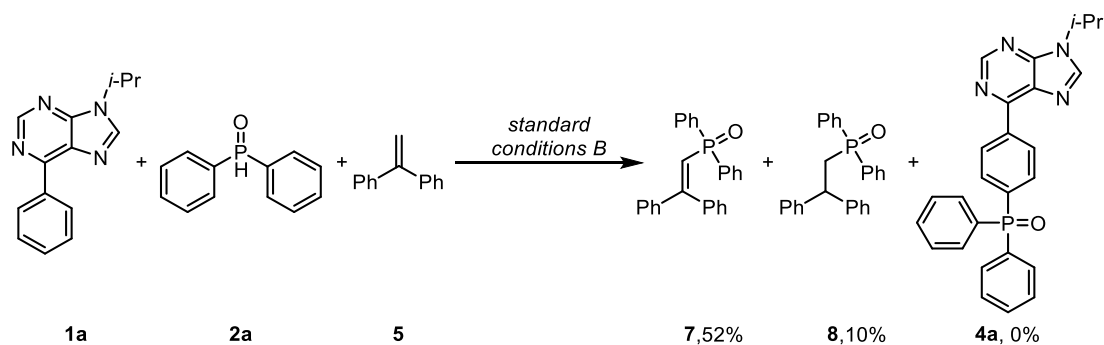

Following standard procedure B using **1a** (0.3 mmol, 1.0 equiv), **2a** (1.2 mmol, 4.0 equiv), [RuCl<sub>3</sub>·3H<sub>2</sub>O] (10 mol %), NaOAc (5.0 equiv), Et<sub>3</sub>N (3.0 equiv), **5** (1.2 mmol, 4.0 equiv), MeCN: H<sub>2</sub>O = (0.5 mL: 2.5 mL). After the reaction was completed, the residue was purified with chromatography column on silica gel to give the mixed compounds **7** and **8** (71.5 mg, **7:8** = 5:1).<sup>1</sup>

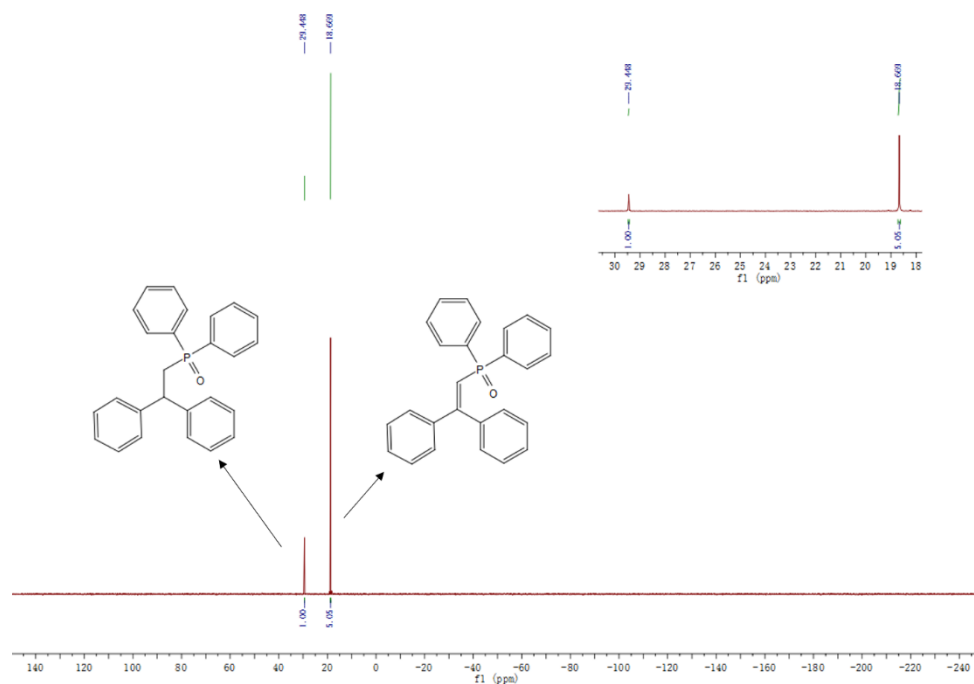

$^{31}\text{P}$  NMR (121 MHz,  $\text{CDCl}_3$ )  $\delta$  29.45, 18.67.

HRMS (ESI)  $m/z$ :  $[\text{M}+\text{H}]^+$  Calcd for  $\text{C}_{26}\text{H}_{22}\text{OP}$  381.1403; Found 381.1408;  $[\text{M}+\text{H}]^+$  Calcd for  $\text{C}_{26}\text{H}_{24}\text{OP}$  383.1559; Found 383.1551.

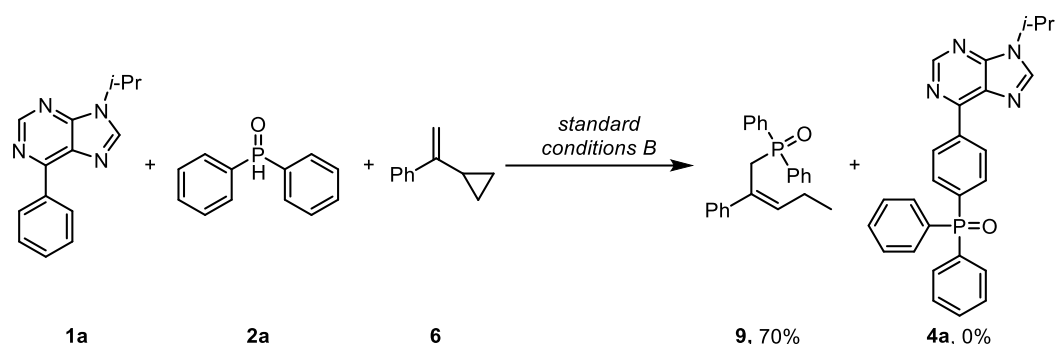

Following standard procedure B using **1a** (0.3 mmol, 1.0 equiv), **2a** (1.2 mmol, 4.0 equiv),  $[\text{RuCl}_3 \cdot 3\text{H}_2\text{O}]$  (10 mol %), NaOAc (5.0 equiv),  $\text{Et}_3\text{N}$  (3.0 equiv), **6** (1.2 mmol, 4.0 equiv),  $\text{MeCN}:\text{H}_2\text{O} = (0.5 \text{ mL} : 2.5 \text{ mL})$ . After the reaction was completed, the residue was purified with chromatography column on silica gel to give the compound **9** (72.7 mg, 70%).

(Z)-Diphenyl(2-phenylpent-2-en-1-yl)phosphine oxide (**9**)

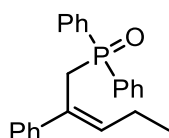

$^1\text{H}$  NMR (300 MHz,  $\text{CDCl}_3$ )  $\delta$  7.60 – 7.53 (m, 4H), 7.36 – 7.30 (m, 2H), 7.27 – 7.21 (m, 4H), 7.06 – 7.00 (m, 5H), 5.71 – 5.60 (m, 1H), 3.54 (d,  $J = 14.8 \text{ Hz}$ , 2H), 2.11 – 2.02 (m, 2H), 0.87 (t,  $J = 7.5 \text{ Hz}$ , 3H).

$^{31}\text{P}$  NMR (121 MHz,  $\text{CDCl}_3$ )  $\delta$  28.63.

HRMS (ESI)  $m/z$ :  $[\text{M}+\text{H}]^+$  Calcd for  $\text{C}_{23}\text{H}_{24}\text{OP}$  347.1559; Found 347.1563.

IR (ATR): 3055, 2961, 1591, 1436, 1182, 909, 712, 506  $\text{cm}^{-1}$ .

### 3) H/D-Exchange study for the *ortho*-C–H phosphorylation

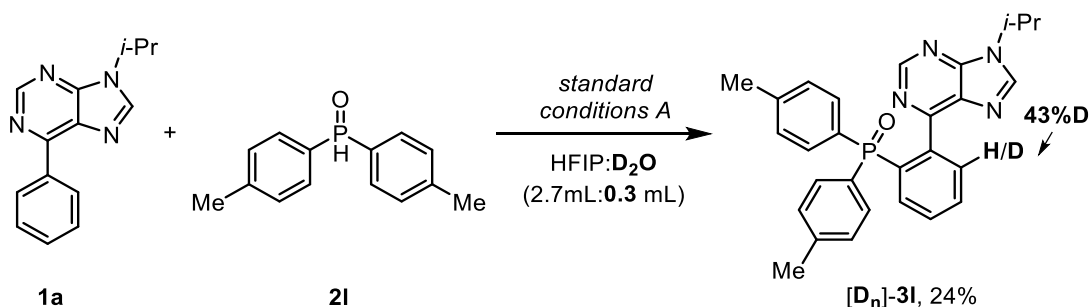

Following standard procedure A using **1a** (0.3 mmol, 1.0 equiv), **2I** (1.2 mmol, 4.0 equiv),  $[\text{Ru}(\text{OAc})_2(p\text{-cymene})]$  (10 mol %), NaOAc (4.0 equiv),  $\text{HFIP}:\text{D}_2\text{O} = (2.7 \text{ mL} : 0.3 \text{ mL})$ . After the reaction was completed, the residue was purified with column chromatography on silica gel to give the product  $[\text{D}]_n\text{-3I}$  in a 24% isolated yield. The H incorporation was determined by  $^1\text{H}$ -NMR spectroscopy.

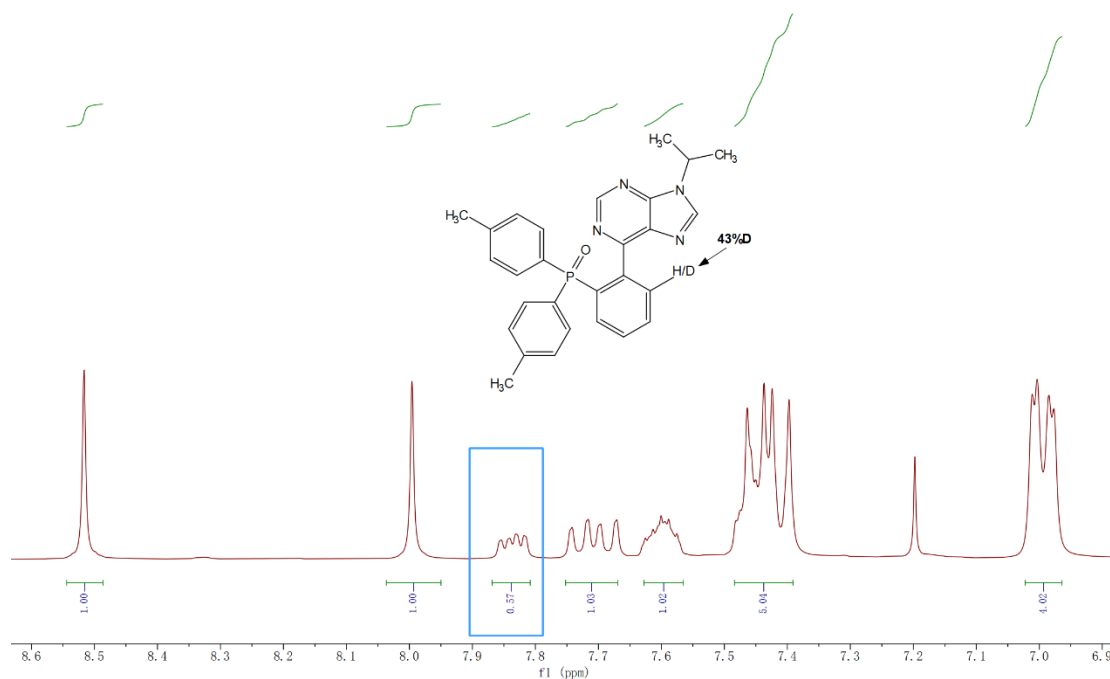

#### 4) H/D-Exchange study for the *para*-C–H phosphorylation

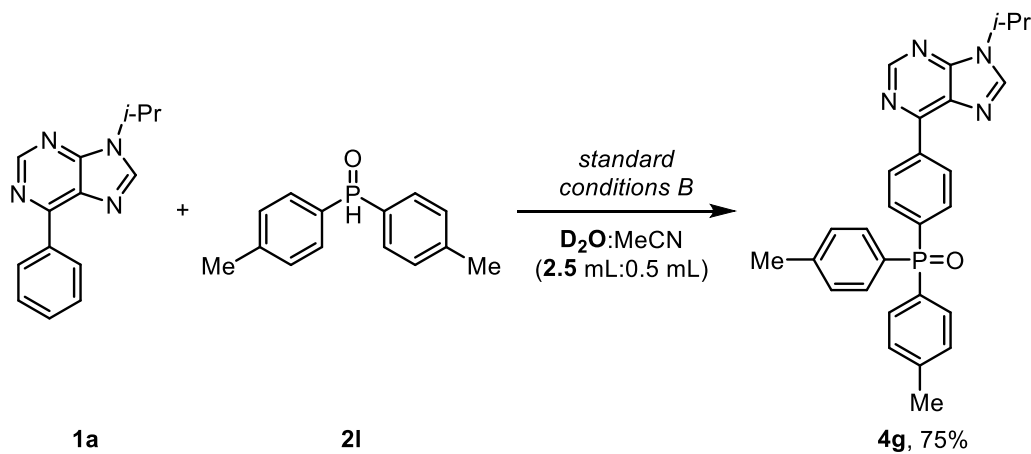

Following standard procedure B using **1a** (0.3 mmol, 1.0 equiv), **2I** (1.2 mmol, 4.0 equiv), [RuCl<sub>3</sub>·3H<sub>2</sub>O] (10 mol %), NaOAc (5.0 equiv), Et<sub>3</sub>N (3.0 equiv), D<sub>2</sub>O:MeCN = (2.5 mL:0.5 mL). After the reaction was completed, the residue was purified with column chromatography on silica gel to give the product **4g** in a 75% isolated yield. No H/D exchange was detected by <sup>1</sup>H-NMR spectroscopy.

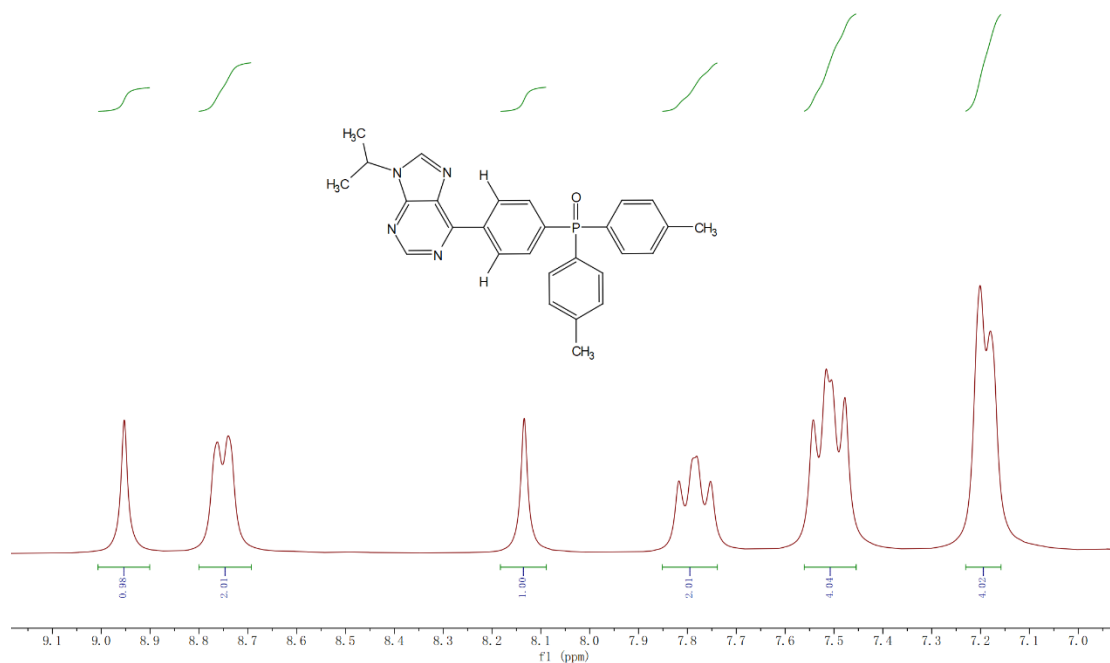

### 5) Hydrogen detection for the *ortho*-C–H phosphorylation

Following standard procedure A using **1a** (0.3 mmol, 1.0 equiv), **2a** (1.2 mmol, 4.0 equiv), [Ru(OAc)<sub>2</sub>(*p*-cymene)] (10 mol %), NaOAc (4.0 equiv), HFIP (3.0 mL). After the reaction was completed, 1.0 mL of the headspace volume was removed for GC analysis.

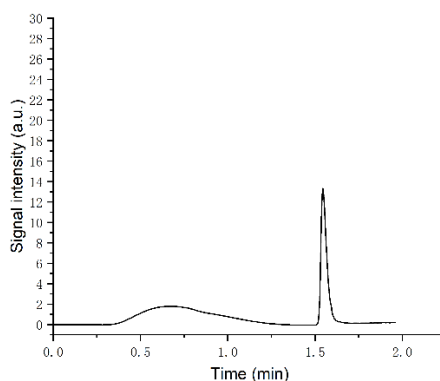

**Figure S2.** GC-TCD chromatogram obtained for the headspace analysis of the *ortho*-C–H phosphorylation.

### 6) Gas evolution measurement for the *ortho*-C–H phosphorylation:

Following standard procedure A using **1a** (0.3 mmol, 1.0 equiv), **2a** (1.2 mmol, 4.0 equiv), [Ru(OAc)<sub>2</sub>(*p*-cymene)] (10 mol %), NaOAc (4.0 equiv), HFIP (3.0 mL) at 55 °C under air atmosphere according to the general procedure.

The change in volume of the headspace was recorded under isobaric conditions.

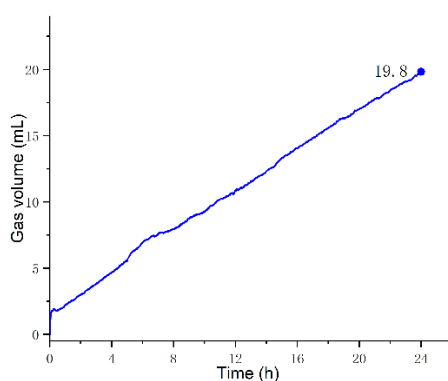

**Figure S3.** Measurement of the hydrogen volume generated during catalysis.

Calculation of cathode hydrogen generation efficiency:

Current:  $I = 3.5 \text{ mA}$ , Time:  $t = 24 \text{ h} = 86400 \text{ s}$ , Faraday constant:  $F = 96485.3321 \text{ C/mol}$

Therefore, the number of electrons passing through the electron cathode is:

$$n_e = \frac{I \times t}{F} = 0.0035 \text{ A} \times 86400 \text{ s} \div 96485.3321 \text{ C/mol} = 0.003134 \text{ mol} = 3.134 \text{ mmol}$$

Theoretical hydrogen production:

$$n_{H_2} = \frac{n_e}{2} = 1.567 \text{ mmol}$$

Measured amount of hydrogen:

$$V_{mH_2} = 19.8 \text{ mL} = 0.0000198 \text{ m}^3$$

$$n_{mH_2} = \frac{P \times V_{mH_2}}{RT} = \frac{99270 \text{ Pa} \times 0.0000198 \text{ m}^3}{8.3145 \text{ J/(K} \cdot \text{mol)} \times 298.15 \text{ K}} = 0.000793 \text{ mol} = 0.793 \text{ mmol}$$

Hydrogen generation efficiency:

$$efficiency = \frac{0.793 \text{ mmol}}{1.567 \text{ mmol}} = 50\%$$

### 7) Hydrogen detection for the *para*-C–H phosphorylation

Following standard procedure B using **1a** (0.3 mmol, 1.0 equiv), **2a** (1.2 mmol, 4.0 equiv),  $[\text{RuCl}_3 \cdot 3\text{H}_2\text{O}]$  (10 mol %), NaOAc (5.0 equiv),  $\text{Et}_3\text{N}$  (3.0 equiv), MeCN:  $\text{H}_2\text{O} = (0.5 \text{ mL}: 2.5 \text{ mL})$ . After the reaction was completed, 1.0 mL of the headspace volume was removed for GC analysis.

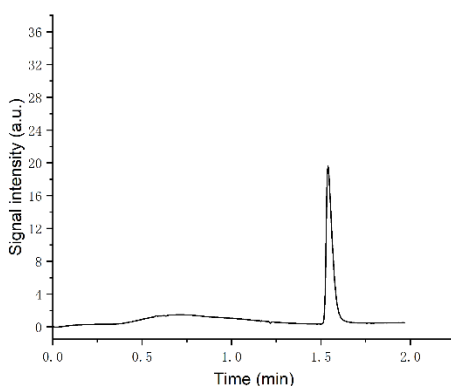

**Figure S4.** GC-TCD chromatogram obtained for the headspace analysis of the *para*-C–H phosphorylation.

**8) Gas evolution measurement for the *para*-C–H phosphorylation:**

Following standard procedure B using **1a** (0.3 mmol, 1.0 equiv), **2a** (1.2 mmol, 4.0 equiv), [RuCl<sub>3</sub>·3H<sub>2</sub>O] (10 mol %), NaOAc (5.0 equiv), Et<sub>3</sub>N (3.0 equiv), MeCN: H<sub>2</sub>O = (0.5 mL: 2.5 mL) at 35 °C under N<sub>2</sub> atmosphere according to the general procedure.

The change in volume of the headspace was recorded under isobaric conditions.

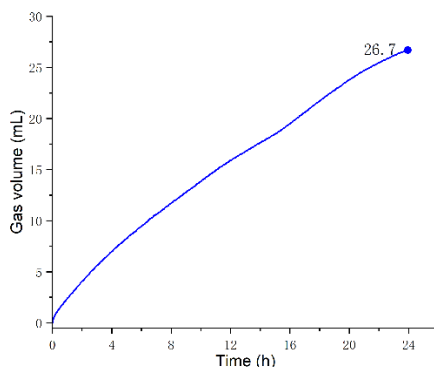

**Figure S5.** Measurement of the hydrogen volume generated during catalysis.

Calculation of cathode hydrogen generation efficiency:

Current:  $I = 3.5 \text{ mA}$ , Time:  $t = 24 \text{ h} = 86400 \text{ s}$ , Faraday constant:  $F = 96485.3321 \text{ C/mol}$

Therefore, the number of electrons passing through the electron cathode is:

$$n_e = \frac{I \times t}{F} = 0.0035 \text{ A} \times 86400 \text{ s} \div 96485.3321 \text{ C/mol} = 0.003134 \text{ mol} = 3.134 \text{ mmol}$$

Theoretical hydrogen production:

$$n_{H_2} = \frac{n_e}{2} = 1.567 \text{ mmol}$$

Measured amount of hydrogen:



$$V_{mH_2} = 26.7 \text{ mL} = 0.0000267 \text{ m}^3$$

$$n_{mH_2} = \frac{P \times V_{mH_2}}{RT} = \frac{99270 \text{ Pa} \times 0.0000267 \text{ m}^3}{8.3145 \text{ J}/(\text{K} \cdot \text{mol}) \times 298.15 \text{ K}} = 0.001069 \text{ mol} = 1.069 \text{ mmol}$$

Hydrogen generation efficiency:

$$efficiency = \frac{1.069 \text{ mmol}}{1.567 \text{ mmol}} = 68\%$$

### 9) Cyclic Voltammetry Studies

CV measurements were conducted with a Metrohm Autolab PGSTAT204 potentiostat and Nova 2.1 software. A glassy carbon working electrode (disk, diameter: 3mm), a coiled platinum wire counter electrode and a saturated calomel reference electrode (SCE) were employed.

The voltammograms were recorded at room temperature in HFIP (3 mL) at a substrate concentration of 25.0 mmol/L and with 100 mmol/L *n*-Bu<sub>4</sub>NPF<sub>6</sub> as supporting electrolyte. The scan rate is 100 mV/s.

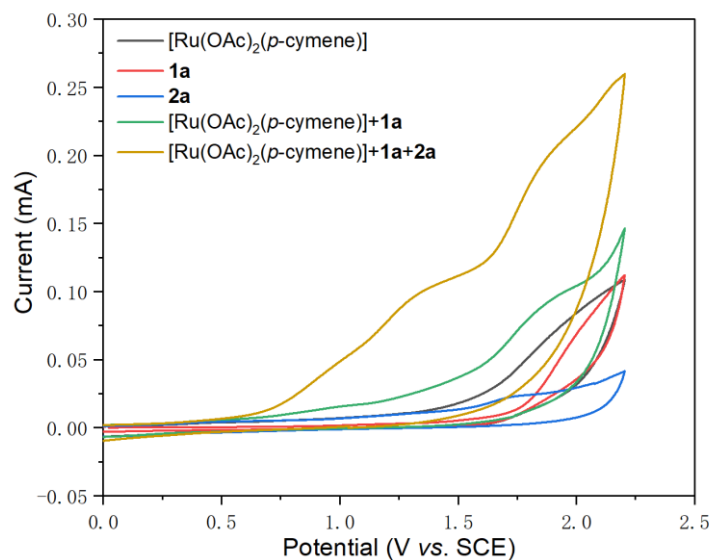

**Figure S6.** Cyclic voltammetry studies for *ortho*-C–H phosphorylation.

The voltammograms were recorded at room temperature in 5 mL H<sub>2</sub>O/MeCN (1:1) at a substrate concentration of 15.0 mmol/L and with 60 mmol/L *n*-Bu<sub>4</sub>NPF<sub>6</sub> as supporting electrolyte. The scan rate is 100 mV/s.

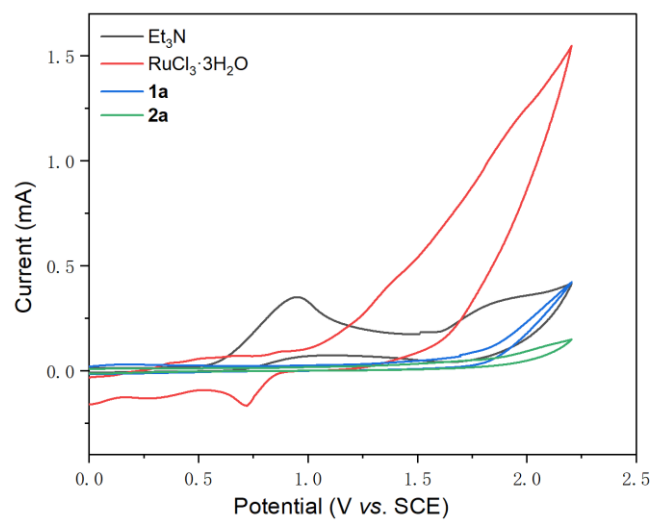

**Figure S7.** Cyclic voltammetry studies for *para*-C–H phosphorylation.

## 5. X-ray Crystallographic Data

X-ray crystallographic data of **3i**. (CCDC: 2360253)

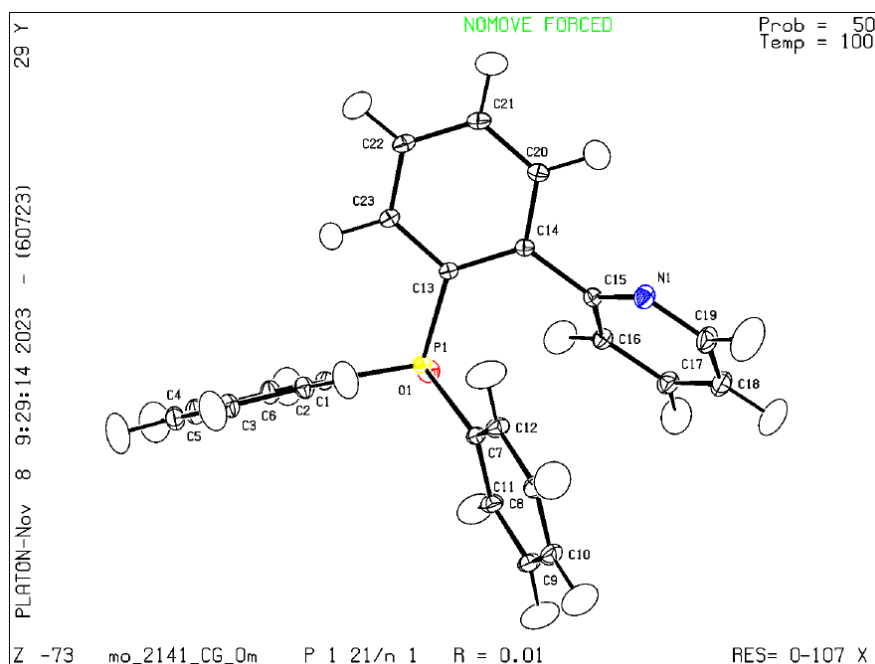

|                        |                                       |                                       |             |
|------------------------|---------------------------------------|---------------------------------------|-------------|
| Bond precision:        | C-C = 0.0004 Å                        | Wavelength=0.71073                    |             |
| Cell:                  | a=8.8853(7)                           | b=21.2925(17)                         | c=9.3998(7) |
|                        | alpha=90                              | beta=102.203 (3)                      | gamma=90    |
| Temperature:           | 100 K                                 |                                       |             |
|                        | Calculated                            | Reported                              |             |
| Volume                 | 1738.2(2)                             | 1738.2(2)                             |             |
| Space group            | P 21/n                                | P 1 21/n 1                            |             |
| Hall group             | -P 2yn                                | -P 2yn                                |             |
| Moiety formula         | C <sub>23</sub> H <sub>18</sub> N O P | C <sub>23</sub> H <sub>18</sub> N O P |             |
| Sum formula            | C <sub>23</sub> H <sub>18</sub> N O P | C <sub>23</sub> H <sub>18</sub> N O P |             |
| Mr                     | 355.35                                | 355.38                                |             |
| Dx, g cm <sup>-3</sup> | 1.358                                 | 1.358                                 |             |
| Z                      | 4                                     | 4                                     |             |
| Mu (mm <sup>-1</sup> ) | 0.170                                 | 0.170                                 |             |
| F000                   | 744.0                                 | 744.8                                 |             |
| F000'                  | 744.68                                |                                       |             |
| h,k,lmax               | 13,33,14                              | 13,33,14                              |             |
| Nref                   | 6942                                  | 6932                                  |             |
| Tmin,Tmax              | 0.924,0.932                           | 0.912,0.976                           |             |
| Tmin'                  | 0.924                                 |                                       |             |

Correction method= # Reported T Limits: Tmin=0.912 Tmax=0.976

AbsCorr = NUMERICAL

Data completeness= 0.999

Theta(max)= 33.740

R(reflections)= 0.0113( 6753)

wR2(reflections)= 0.0275( 6932)

S = 1.091

Npar= 397

---

X-ray crystallographic data of **4a**. (CCDC: 2360254)

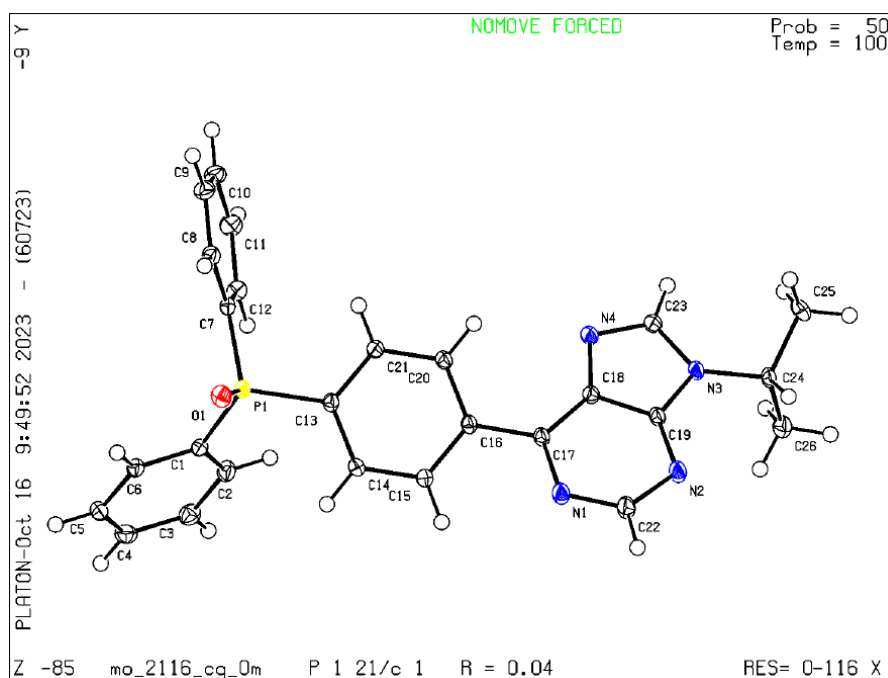

|                                     |                                                    |                                                    |              |
|-------------------------------------|----------------------------------------------------|----------------------------------------------------|--------------|
| Bond precision:                     | C-C = 0.0016 Å                                     | Wavelength=0.71073                                 |              |
| Cell:                               | a=9.7051(6)                                        | b=22.4271(11)                                      | c=10.9067(7) |
|                                     | alpha=90                                           | beta=113.919(2)                                    | gamma=90     |
| Temperature:                        | 100 K                                              |                                                    |              |
|                                     | Calculated                                         | Reported                                           |              |
| Volume                              | 2170.1(2)                                          | 2170.0(2)                                          |              |
| Space group                         | P 21/c                                             | P 1 21/c 1                                         |              |
| Hall group                          | -P 2ybc                                            | -P 2ybc                                            |              |
| Moiety formula                      | C <sub>26</sub> H <sub>23</sub> N <sub>4</sub> O P | C <sub>26</sub> H <sub>23</sub> N <sub>4</sub> O P |              |
| Sum formula                         | C <sub>26</sub> H <sub>23</sub> N <sub>4</sub> O P | C <sub>26</sub> H <sub>23</sub> N <sub>4</sub> O P |              |
| Mr                                  | 438.45                                             | 438.45                                             |              |
| D <sub>x</sub> , g cm <sup>-3</sup> | 1.342                                              | 1.342                                              |              |
| Z                                   | 4                                                  | 4                                                  |              |
| Mu (mm <sup>-1</sup> )              | 0.154                                              | 0.154                                              |              |
| F <sub>000</sub>                    | 920.0                                              | 920.0                                              |              |
| F <sub>000</sub> <sup>o</sup>       | 920.71                                             |                                                    |              |
| h,k,l <sub>max</sub>                | 14,33,16                                           | 14,33,16                                           |              |
| N <sub>ref</sub>                    | 7253                                               | 6973                                               |              |
| T <sub>min</sub> , T <sub>max</sub> | 0.930, 0.981                                       | 0.784, 1.000                                       |              |
| T <sub>min</sub> <sup>o</sup>       | 0.930                                              |                                                    |              |

Correction method= # Reported T Limits: T<sub>min</sub>=0.784 T<sub>max</sub>=1.000

AbsCorr = NUMERICAL

Data completeness= 0.961

Theta(max)= 33.551

R(reflections)= 0.0402( 6320)

wR2(reflections)= 0.1088( 6973)

S = 1.024

Npar= 291

---

## 6. Computational Studies

All calculations were performed using the Gaussian 16, Revision A.03 package.<sup>2</sup> All structures were optimized at the PBE0<sup>3,4</sup> level of theory in combination with D3 dispersion corrections with the Becke-Johnson damping scheme (D3BJ).<sup>5,6</sup> Analytical frequency calculations were carried out at the same level of theory in order to identify each stationary point as either an intermediate (no imaginary frequencies) or a transition state (only one imaginary frequency) and to provide thermal and non-thermal corrections to the Gibbs free energy at 338.15 K and 1 atm. All atoms were described with the def2-SVP basis set, while ruthenium was in addition described with a SSD pseudopotential.<sup>7-11</sup> The electronic energy was then refined through PBE0 single-point calculations on the optimized geometries in combination with a standalone version of Grimme's most recent dispersion correction D4<sup>12,13</sup> with a def2-TZVPP basis set combined with a SSD pseudopotential for ruthenium.<sup>7-11</sup> Solvent effects were included implicitly through the use of the SMD<sup>14</sup> model for HFIP the parameters were taken from Liu, Engle and coworkers.<sup>15</sup> Energies reported herein are based on gas-phase Gibbs free energies with a def2-SVP basis set for which the electronic energies were corrected to PBE0-D4 with a def2-TZVPP basis set and solvent effects.

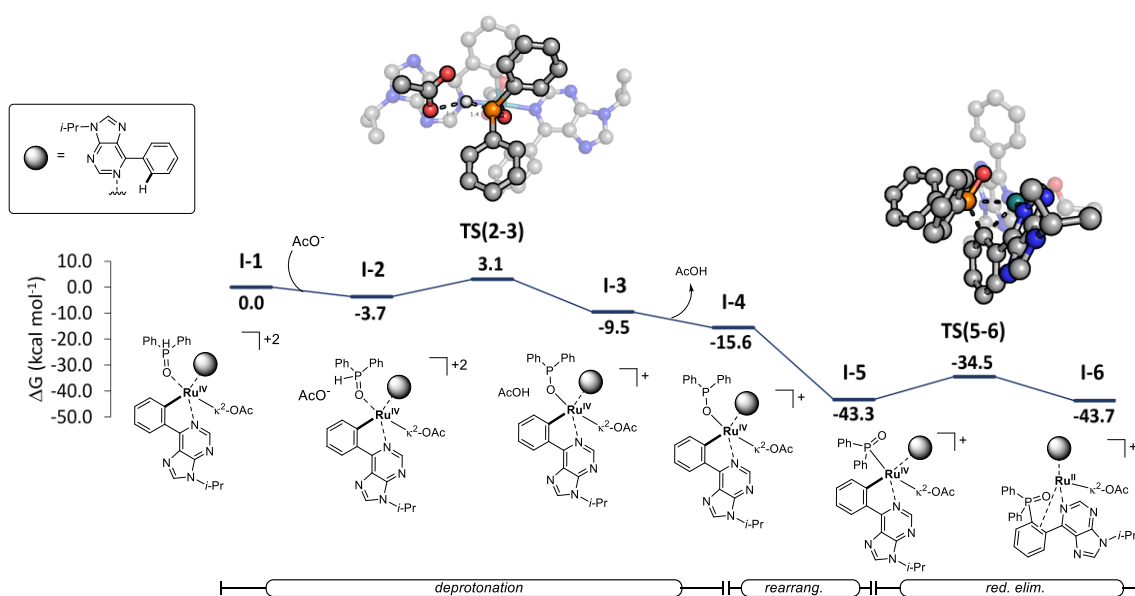

**Figure S8.** Computed relative Gibbs free energies ( $\Delta G_{338.15}$ ) in kcal mol<sup>-1</sup> for the ruthenium-catalyzed ortho-C-H phosphorylation at the PBE0-D4/def2-TZVPP-SMD(HFIP)//PBE0-D3BJ/def2-SVP level of theory.

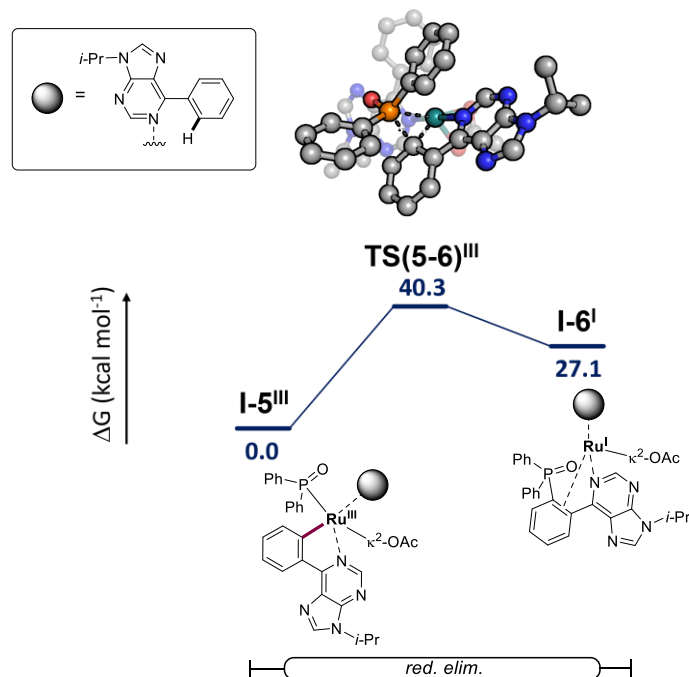

**Figure S9.** Computed relative Gibbs free energies ( $\Delta G_{338.15}$ ) in kcal mol<sup>-1</sup> for the ruthenium-catalyzed ortho-C-H phosphorylation reductive elimination step through a ruthenium(III) pathway at the PBE0-D4/def2-TZVPP-SMD(HFIP)//PBE0-D3BJ/def2-SVP level of theory.

**Table S3.** Calculated electronic energies at the PBE0-D4/def2-TZVPP-SMD(HFIP) level of theory and Gibbs free energies with dispersion corrections for all structures in the present work (all in Hartree).

| Structure              | Electronic Energy | Total Gibbs Free Energy |
|------------------------|-------------------|-------------------------|
| I-1                    | -2723.228119      | -2722.561087            |
| I-2                    | -2951.725394      | -2951.014093            |
| TS(2-3)                | -2951.710840      | -2951.003381            |
| I-3                    | -2951.731412      | -2951.023461            |
| I-4                    | -2722.780299      | -2722.124228            |
| I-5                    | -2722.827029      | -2722.168375            |
| TS(5-6)                | -2722.812487      | -2722.154319            |
| I-6                    | -2722.827574      | -2722.169027            |
| I-5 <sup>III</sup>     | -2722.989976      | -2722.335678            |
| TS(5-6) <sup>III</sup> | -2722.924999      | -2722.271498            |
| I-6 <sup>I</sup>       | -2722.946189      | -2722.292517            |
| Acetate                | -228.463443       | -228.447157             |
| Acetic Acid            | -228.939683       | -228.908851             |



## Cartesian coordinates of the optimized structures

### I-1

Lowest frequency = 12.4224 cm<sup>-1</sup>

Charge = 2, Multiplicity = 1

96

|    |           |           |           |
|----|-----------|-----------|-----------|
| Ru | -0.205080 | -1.257346 | -0.239294 |
| O  | 0.230397  | -2.725443 | -1.613169 |
| C  | -0.161583 | -3.673466 | -0.860006 |
| O  | -0.575914 | -3.246258 | 0.256475  |
| C  | -0.106264 | -5.097317 | -1.235002 |
| H  | -0.812539 | -5.680260 | -0.631052 |
| H  | -0.312404 | -5.215244 | -2.307144 |
| H  | 0.912223  | -5.471228 | -1.041852 |
| N  | -2.317288 | -1.177931 | -0.400698 |
| C  | -2.836154 | -0.167919 | -1.150216 |
| C  | -3.135128 | -1.953855 | 0.354580  |
| C  | -4.200131 | 0.093001  | -1.014144 |
| C  | -1.948702 | 0.558364  | -2.059765 |
| N  | -4.433024 | -1.806357 | 0.494433  |
| H  | -2.652067 | -2.776805 | 0.884110  |
| C  | -4.941895 | -0.778895 | -0.177219 |
| N  | -5.021468 | 1.030621  | -1.571832 |
| C  | -0.918983 | -0.143593 | -2.713043 |
| C  | -2.070677 | 1.940121  | -2.242434 |
| N  | -6.229266 | -0.345323 | -0.249887 |
| C  | -6.203975 | 0.739216  | -1.094801 |
| C  | 0.007529  | 0.543899  | -3.501818 |
| H  | -0.925168 | -1.236762 | -2.722277 |
| C  | -1.131423 | 2.617317  | -3.013123 |
| H  | -2.891285 | 2.478451  | -1.768937 |
| C  | -7.418602 | -0.917862 | 0.405876  |
| H  | -7.121351 | 1.284489  | -1.325765 |
| C  | -0.085126 | 1.926549  | -3.634248 |
| H  | 0.774758  | -0.008180 | -4.049846 |
| H  | -1.220300 | 3.698472  | -3.140661 |
| C  | -7.678195 | -2.326999 | -0.104164 |
| C  | -7.280883 | -0.837333 | 1.918261  |
| H  | -8.245159 | -0.263613 | 0.086391  |
| H  | 0.632010  | 2.467340  | -4.256013 |
| H  | -8.615099 | -2.706352 | 0.327137  |

|   |           |           |           |
|---|-----------|-----------|-----------|
| H | -7.777724 | -2.343317 | -1.199086 |
| H | -6.866303 | -3.007244 | 0.190744  |
| H | -6.456669 | -1.473813 | 2.271157  |
| H | -8.208920 | -1.188846 | 2.390302  |
| H | -7.103152 | 0.196376  | 2.249126  |
| N | 1.858002  | -1.130799 | -0.259718 |
| C | 2.482043  | -1.081952 | 0.943695  |
| C | 2.564725  | -1.057433 | -1.410477 |
| C | 3.867838  | -0.929220 | 0.942134  |
| C | 1.583131  | -1.189711 | 2.066103  |
| N | 3.869042  | -0.930666 | -1.499123 |
| H | 1.986522  | -1.123496 | -2.332914 |
| C | 4.495154  | -0.868102 | -0.327101 |
| N | 4.794629  | -0.838405 | 1.939300  |
| C | 1.973851  | -1.134438 | 3.411945  |
| C | 0.225448  | -1.337492 | 1.719885  |
| N | 5.827051  | -0.749017 | -0.066016 |
| C | 5.934847  | -0.738194 | 1.303886  |
| C | 1.002208  | -1.221039 | 4.402698  |
| H | 3.034278  | -1.026920 | 3.651950  |
| C | -0.740888 | -1.423957 | 2.716515  |
| C | 6.940744  | -0.727090 | -1.030765 |
| H | 6.911514  | -0.654714 | 1.784558  |
| C | -0.344973 | -1.360700 | 4.055884  |
| H | 1.292050  | -1.185111 | 5.454736  |
| H | -1.799287 | -1.530831 | 2.478596  |
| C | 7.015592  | -2.050207 | -1.777806 |
| C | 6.832973  | 0.477063  | -1.952727 |
| H | 7.840767  | -0.618485 | -0.405106 |
| H | -1.103403 | -1.428553 | 4.839542  |
| H | 7.901996  | -2.056823 | -2.427389 |
| H | 7.099244  | -2.896936 | -1.081342 |
| H | 6.127470  | -2.194312 | -2.409914 |
| H | 5.926581  | 0.416180  | -2.571978 |
| H | 7.703731  | 0.504511  | -2.622408 |
| H | 6.817408  | 1.416436  | -1.382058 |
| O | -0.394283 | 0.676205  | 0.156247  |
| P | 0.204717  | 1.760071  | 1.115983  |
| H | 0.110763  | 1.307274  | 2.452821  |
| C | -0.804564 | 3.215774  | 0.912144  |
| C | -0.230382 | 4.465669  | 0.652660  |
| C | -2.198224 | 3.071236  | 0.996152  |
| C | -1.057505 | 5.572701  | 0.473254  |
| H | 0.854690  | 4.576243  | 0.589240  |

|   |           |          |           |
|---|-----------|----------|-----------|
| C | -3.012488 | 4.182446 | 0.815827  |
| H | -2.644171 | 2.091682 | 1.188499  |
| C | -2.441967 | 5.430765 | 0.553047  |
| H | -0.617360 | 6.551346 | 0.271452  |
| H | -4.097704 | 4.078267 | 0.876958  |
| H | -3.085446 | 6.302238 | 0.412648  |
| C | 1.928003  | 2.105581 | 0.826463  |
| C | 2.803603  | 2.249288 | 1.909754  |
| C | 2.383723  | 2.246033 | -0.493022 |
| C | 4.142292  | 2.548017 | 1.670898  |
| H | 2.448939  | 2.122999 | 2.936113  |
| C | 3.725701  | 2.533554 | -0.718811 |
| H | 1.692849  | 2.128209 | -1.332615 |
| C | 4.598272  | 2.691099 | 0.361006  |
| H | 4.829863  | 2.665550 | 2.510504  |
| H | 4.094421  | 2.641592 | -1.740887 |
| H | 5.647045  | 2.935940 | 0.178385  |

## I-2

Lowest frequency = 13.4853 cm<sup>-1</sup>

Charge = 1, Multiplicity = 1

103

|    |           |           |           |
|----|-----------|-----------|-----------|
| Ru | -0.246206 | -0.986907 | -1.079319 |
| O  | 0.083199  | -1.447083 | -3.086147 |
| C  | -0.381522 | -2.630916 | -2.997549 |
| O  | -0.788305 | -2.945796 | -1.851608 |
| C  | -0.397540 | -3.554556 | -4.157843 |
| H  | -1.116730 | -4.365094 | -3.990454 |
| H  | -0.632850 | -3.003676 | -5.077908 |
| H  | 0.606656  | -3.991275 | -4.273711 |
| N  | -2.347460 | -0.604412 | -1.177391 |
| C  | -2.813249 | 0.668100  | -1.272808 |
| C  | -3.180637 | -1.612680 | -0.825597 |
| C  | -4.129267 | 0.886165  | -0.842018 |
| C  | -1.979150 | 1.726650  | -1.847496 |
| N  | -4.434005 | -1.497902 | -0.442557 |
| H  | -2.744739 | -2.612406 | -0.864940 |
| C  | -4.869435 | -0.242606 | -0.424350 |
| N  | -4.894506 | 2.017899  | -0.734398 |
| C  | -1.097935 | 1.424809  | -2.897080 |
| C  | -2.074949 | 3.047376  | -1.388037 |

|   |           |           |           |
|---|-----------|-----------|-----------|
| N | -6.092581 | 0.234154  | -0.054798 |
| C | -6.034602 | 1.592152  | -0.262230 |
| C | -0.299237 | 2.419278  | -3.451012 |
| H | -1.069176 | 0.417376  | -3.315229 |
| C | -1.269219 | 4.035051  | -1.942485 |
| H | -2.786098 | 3.296267  | -0.600222 |
| C | -7.232676 | -0.528743 | 0.465365  |
| H | -6.894963 | 2.225680  | -0.038248 |
| C | -0.376017 | 3.724491  | -2.967055 |
| H | 0.372764  | 2.176591  | -4.277425 |
| H | -1.336348 | 5.058092  | -1.568706 |
| C | -7.735611 | -1.517740 | -0.575803 |
| C | -6.867894 | -1.185692 | 1.789050  |
| H | -8.012766 | 0.228399  | 0.645411  |
| H | 0.252246  | 4.506669  | -3.398108 |
| H | -8.634772 | -2.026607 | -0.200529 |
| H | -7.997635 | -1.006270 | -1.513291 |
| H | -6.971047 | -2.278146 | -0.789624 |
| H | -6.076188 | -1.934873 | 1.644081  |
| H | -7.748579 | -1.691285 | 2.209729  |
| H | -6.520406 | -0.439803 | 2.519300  |
| N | 1.785562  | -1.229364 | -1.013962 |
| C | 2.277515  | -1.995972 | -0.007343 |
| C | 2.601040  | -0.524422 | -1.823521 |
| C | 3.661916  | -1.999725 | 0.164108  |
| C | 1.258319  | -2.552540 | 0.851498  |
| N | 3.907882  | -0.436821 | -1.700132 |
| H | 2.110204  | 0.028943  | -2.628399 |
| C | 4.403523  | -1.151290 | -0.694877 |
| N | 4.478590  | -2.557340 | 1.106173  |
| C | 1.525903  | -3.348292 | 1.973019  |
| C | -0.059418 | -2.137308 | 0.552344  |
| N | 5.685243  | -1.207859 | -0.238472 |
| C | 5.656736  | -2.057912 | 0.837894  |
| C | 0.474771  | -3.731986 | 2.798171  |
| H | 2.557813  | -3.634800 | 2.186322  |
| C | -1.095142 | -2.504617 | 1.406718  |
| C | 6.835612  | -0.423108 | -0.702049 |
| H | 6.567882  | -2.272432 | 1.399105  |
| C | -0.823871 | -3.301536 | 2.520896  |
| H | 0.669163  | -4.356483 | 3.672459  |
| H | -2.114421 | -2.153316 | 1.250785  |
| C | 7.195263  | -0.792562 | -2.132859 |
| C | 6.567900  | 1.063310  | -0.509787 |

|   |           |           |           |
|---|-----------|-----------|-----------|
| H | 7.659366  | -0.726832 | -0.036072 |
| H | -1.643285 | -3.577012 | 3.188815  |
| H | 8.095199  | -0.242451 | -2.442578 |
| H | 7.401409  | -1.868647 | -2.227518 |
| H | 6.376980  | -0.527350 | -2.817705 |
| H | 5.794537  | 1.408507  | -1.210649 |
| H | 7.488674  | 1.633208  | -0.699263 |
| H | 6.214967  | 1.271643  | 0.509767  |
| O | -0.172794 | 0.529482  | -0.042539 |
| P | 0.843738  | 0.986719  | 1.320716  |
| H | 1.769303  | -0.010959 | 1.031996  |
| C | -0.534884 | 0.679820  | 2.459824  |
| C | -1.833811 | 1.042575  | 2.079135  |
| C | -0.325990 | 0.011838  | 3.669899  |
| C | -2.912836 | 0.731076  | 2.900567  |
| H | -1.994030 | 1.567369  | 1.137874  |
| C | -1.413283 | -0.318593 | 4.475387  |
| H | 0.685248  | -0.257307 | 3.974632  |
| C | -2.705718 | 0.038345  | 4.093856  |
| H | -3.920788 | 1.031753  | 2.604060  |
| H | -1.246763 | -0.855217 | 5.411967  |
| H | -3.553849 | -0.216002 | 4.734015  |
| C | 1.089973  | 2.649427  | 0.658904  |
| C | 0.457179  | 3.737623  | 1.267541  |
| C | 1.983243  | 2.851087  | -0.396227 |
| C | 0.712824  | 5.027163  | 0.808592  |
| H | -0.222193 | 3.580867  | 2.108842  |
| C | 2.242819  | 4.145879  | -0.839148 |
| H | 2.503817  | 2.007008  | -0.851157 |
| C | 1.608314  | 5.233004  | -0.240821 |
| H | 0.219262  | 5.878053  | 1.283648  |
| H | 2.952459  | 4.304883  | -1.654185 |
| H | 1.817560  | 6.247281  | -0.588678 |
| O | 3.755141  | 0.936614  | 1.560887  |
| C | 3.221917  | 1.293844  | 2.597059  |
| O | 1.914218  | 1.389975  | 2.745587  |
| C | 3.981090  | 1.691176  | 3.828588  |
| H | 3.539692  | 1.226558  | 4.720883  |
| H | 5.037303  | 1.416167  | 3.730197  |
| H | 3.897583  | 2.781322  | 3.956815  |

**TS(2-3)**

Lowest frequency = -173.7764 cm<sup>-1</sup>

Charge = 1, Multiplicity = 1

103

|    |           |           |           |
|----|-----------|-----------|-----------|
| Ru | -0.321971 | -1.302334 | -0.650503 |
| O  | 0.067200  | -2.583381 | -2.226040 |
| C  | -0.379525 | -3.615443 | -1.629145 |
| O  | -0.807715 | -3.373339 | -0.470607 |
| C  | -0.354355 | -4.963477 | -2.238053 |
| H  | -1.099595 | -5.611211 | -1.760808 |
| H  | -0.524851 | -4.895689 | -3.320291 |
| H  | 0.644253  | -5.399546 | -2.077431 |
| N  | -2.439617 | -1.079412 | -0.852263 |
| C  | -2.912984 | 0.025171  | -1.488119 |
| C  | -3.274392 | -1.857928 | -0.122822 |
| C  | -4.242359 | 0.377952  | -1.234236 |
| C  | -2.035550 | 0.763520  | -2.398084 |
| N  | -4.541425 | -1.616707 | 0.134922  |
| H  | -2.829890 | -2.767867 | 0.284075  |
| C  | -4.991100 | -0.486799 | -0.402009 |
| N  | -5.017665 | 1.426921  | -1.649198 |
| C  | -1.120653 | 0.058200  | -3.196064 |
| C  | -2.058682 | 2.162712  | -2.443864 |
| N  | -6.232489 | 0.069299  | -0.319281 |
| C  | -6.174726 | 1.211131  | -1.084304 |
| C  | -0.201248 | 0.747061  | -3.983612 |
| H  | -1.164210 | -1.031146 | -3.245168 |
| C  | -1.129166 | 2.842584  | -3.222103 |
| H  | -2.787716 | 2.711030  | -1.846788 |
| C  | -7.393370 | -0.430690 | 0.427889  |
| H  | -7.049721 | 1.856228  | -1.184676 |
| C  | -0.190384 | 2.140497  | -3.980079 |
| H  | 0.497062  | 0.192293  | -4.614671 |
| H  | -1.125098 | 3.934055  | -3.226008 |
| C  | -7.842006 | -1.777444 | -0.119599 |
| C  | -7.089114 | -0.459724 | 1.918773  |
| H  | -8.183639 | 0.313469  | 0.239012  |
| H  | 0.539145  | 2.684612  | -4.583639 |
| H  | -8.756548 | -2.101223 | 0.397050  |
| H  | -8.060801 | -1.714999 | -1.195409 |
| H  | -7.066607 | -2.540166 | 0.040504  |
| H  | -6.291479 | -1.184282 | 2.137885  |
| H  | -7.987914 | -0.759093 | 2.476092  |
| H  | -6.778480 | 0.532135  | 2.279390  |

|   |           |           |           |
|---|-----------|-----------|-----------|
| N | 1.723235  | -1.319082 | -0.591746 |
| C | 2.309733  | -1.583911 | 0.603860  |
| C | 2.460433  | -1.028235 | -1.684552 |
| C | 3.699745  | -1.588404 | 0.641001  |
| C | 1.361477  | -1.739389 | 1.678644  |
| N | 3.770537  | -0.960218 | -1.720899 |
| H | 1.899264  | -0.836053 | -2.601761 |
| C | 4.357782  | -1.215626 | -0.557597 |
| N | 4.601920  | -1.750321 | 1.651759  |
| C | 1.706340  | -1.878005 | 3.027073  |
| C | 0.008519  | -1.656583 | 1.285387  |
| N | 5.677526  | -1.149353 | -0.238403 |
| C | 5.751015  | -1.470621 | 1.094493  |
| C | 0.693863  | -1.957337 | 3.975835  |
| H | 2.762158  | -1.892286 | 3.302344  |
| C | -0.997564 | -1.746902 | 2.244683  |
| C | 6.777842  | -0.675945 | -1.085401 |
| H | 6.712710  | -1.480042 | 1.610263  |
| C | -0.646348 | -1.891066 | 3.587049  |
| H | 0.948857  | -2.058505 | 5.032514  |
| H | -2.050848 | -1.668674 | 1.980932  |
| C | 7.053364  | -1.665684 | -2.206961 |
| C | 6.491675  | 0.734502  | -1.583341 |
| H | 7.648131  | -0.647007 | -0.410034 |
| H | -1.435704 | -1.935962 | 4.340562  |
| H | 7.913847  | -1.325478 | -2.800709 |
| H | 7.282764  | -2.665910 | -1.811306 |
| H | 6.183302  | -1.740295 | -2.875571 |
| H | 5.704875  | 0.718222  | -2.350208 |
| H | 7.403125  | 1.163747  | -2.023239 |
| H | 6.138543  | 1.376315  | -0.764453 |
| O | -0.328178 | 0.578444  | -0.287175 |
| P | 0.536118  | 1.481558  | 0.729519  |
| H | 1.892620  | 1.053751  | 0.925600  |
| C | -0.446858 | 1.503675  | 2.229162  |
| C | -1.844864 | 1.434199  | 2.122756  |
| C | 0.178284  | 1.566041  | 3.479557  |
| C | -2.620408 | 1.436001  | 3.276286  |
| H | -2.316730 | 1.358589  | 1.139908  |
| C | -0.615920 | 1.565203  | 4.626595  |
| H | 1.272439  | 1.585008  | 3.533105  |
| C | -2.004517 | 1.501965  | 4.528515  |
| H | -3.709213 | 1.381873  | 3.201745  |
| H | -0.138739 | 1.609478  | 5.608143  |

|   |           |          |           |
|---|-----------|----------|-----------|
| H | -2.615203 | 1.502370 | 5.434616  |
| C | 0.622400  | 3.106408 | -0.013519 |
| C | -0.446931 | 4.008203 | 0.061068  |
| C | 1.791788  | 3.434290 | -0.714760 |
| C | -0.355307 | 5.234279 | -0.588504 |
| H | -1.341510 | 3.758440 | 0.636645  |
| C | 1.867258  | 4.664110 | -1.366366 |
| H | 2.642597  | 2.743266 | -0.702555 |
| C | 0.798042  | 5.557179 | -1.307757 |
| H | -1.180785 | 5.946937 | -0.527278 |
| H | 2.776334  | 4.932973 | -1.908810 |
| H | 0.868704  | 6.523884 | -1.812318 |
| O | 3.742535  | 1.296887 | 0.515865  |
| C | 3.891856  | 1.390508 | 1.767210  |
| O | 2.989333  | 1.132492 | 2.593148  |
| C | 5.233484  | 1.851087 | 2.310558  |
| H | 5.123165  | 2.867283 | 2.719676  |
| H | 5.533645  | 1.201843 | 3.145114  |
| H | 6.013710  | 1.866654 | 1.538264  |

### I-3

Lowest frequency = 9.3613 cm<sup>-1</sup>

Charge = 1, Multiplicity = 1

103

|    |           |           |           |
|----|-----------|-----------|-----------|
| Ru | 0.292215  | 0.976236  | -1.024824 |
| O  | -0.063138 | 1.628059  | -2.961923 |
| C  | 0.324822  | 2.824916  | -2.750411 |
| O  | 0.700793  | 3.042815  | -1.572984 |
| C  | 0.291661  | 3.858375  | -3.812643 |
| H  | 0.950261  | 4.694965  | -3.550818 |
| H  | 0.577421  | 3.419994  | -4.777854 |
| H  | -0.739061 | 4.234648  | -3.905242 |
| N  | 2.422785  | 0.792940  | -1.104400 |
| C  | 2.985007  | -0.426230 | -1.315710 |
| C  | 3.176038  | 1.822067  | -0.646949 |
| C  | 4.314162  | -0.584873 | -0.904934 |
| C  | 2.221889  | -1.486777 | -1.977287 |
| N  | 4.435437  | 1.764991  | -0.271269 |
| H  | 2.664723  | 2.784266  | -0.587295 |
| C  | 4.968365  | 0.552110  | -0.377909 |
| N  | 5.164554  | -1.658581 | -0.913559 |



|   |           |           |           |
|---|-----------|-----------|-----------|
| C | 1.334824  | -1.160308 | -3.014221 |
| C | 2.365018  | -2.824222 | -1.585061 |
| N | 6.227504  | 0.137482  | -0.060394 |
| C | 6.272160  | -1.193918 | -0.403122 |
| C | 0.566922  | -2.152085 | -3.617220 |
| H | 1.274139  | -0.133583 | -3.379786 |
| C | 1.590870  | -3.808002 | -2.187698 |
| H | 3.072212  | -3.084812 | -0.797666 |
| C | 7.312042  | 0.930933  | 0.529062  |
| H | 7.181266  | -1.777256 | -0.244868 |
| C | 0.684003  | -3.475300 | -3.194376 |
| H | -0.111451 | -1.891996 | -4.433247 |
| H | 1.685326  | -4.844172 | -1.858692 |
| C | 7.730611  | 2.049323  | -0.413876 |
| C | 6.911269  | 1.429384  | 1.910130  |
| H | 8.147764  | 0.220583  | 0.634463  |
| H | 0.077515  | -4.255113 | -3.660251 |
| H | 8.592308  | 2.586494  | 0.007051  |
| H | 8.022267  | 1.650615  | -1.396300 |
| H | 6.909770  | 2.767288  | -0.552973 |
| H | 6.066730  | 2.129995  | 1.839175  |
| H | 7.756556  | 1.954951  | 2.376436  |
| H | 6.624981  | 0.593389  | 2.565445  |
| N | -1.750304 | 0.990473  | -0.995440 |
| C | -2.344321 | 1.631948  | 0.042038  |
| C | -2.472273 | 0.339271  | -1.929913 |
| C | -3.740508 | 1.629880  | 0.065352  |
| C | -1.412289 | 2.150156  | 1.010540  |
| N | -3.783616 | 0.243856  | -1.949102 |
| H | -1.898947 | -0.148729 | -2.722192 |
| C | -4.385247 | 0.889127  | -0.953232 |
| N | -4.659145 | 2.136660  | 0.941236  |
| C | -1.782783 | 2.747817  | 2.220993  |
| C | -0.052418 | 1.925692  | 0.697182  |
| N | -5.716218 | 0.961786  | -0.666117 |
| C | -5.807084 | 1.720094  | 0.474006  |
| C | -0.791039 | 3.122863  | 3.119427  |
| H | -2.841973 | 2.884583  | 2.445532  |
| C | 0.928587  | 2.301585  | 1.610380  |
| C | -6.820692 | 0.297435  | -1.367199 |
| H | -6.778681 | 1.936316  | 0.921770  |
| C | 0.552535  | 2.893501  | 2.817687  |
| H | -1.066118 | 3.581602  | 4.070999  |
| H | 1.984468  | 2.108579  | 1.428222  |

|   |           |           |           |
|---|-----------|-----------|-----------|
| C | -6.950915 | 0.827118  | -2.787060 |
| C | -6.650229 | -1.214022 | -1.302772 |
| H | -7.719298 | 0.581245  | -0.795815 |
| H | 1.326544  | 3.165300  | 3.538780  |
| H | -7.822803 | 0.369460  | -3.275614 |
| H | -7.087931 | 1.918187  | -2.793144 |
| H | -6.056048 | 0.579174  | -3.375740 |
| H | -5.775569 | -1.528508 | -1.889593 |
| H | -7.541578 | -1.707132 | -1.715738 |
| H | -6.508571 | -1.554390 | -0.266994 |
| O | 0.326695  | -0.669141 | -0.165553 |
| P | -0.695936 | -1.252055 | 1.043093  |
| H | -2.991228 | -1.008455 | 1.344273  |
| C | 0.403761  | -0.871668 | 2.447052  |
| C | 1.800130  | -0.900523 | 2.304327  |
| C | -0.167463 | -0.459665 | 3.654963  |
| C | 2.615202  | -0.528697 | 3.368098  |
| H | 2.240228  | -1.202219 | 1.351328  |
| C | 0.658428  | -0.098808 | 4.720647  |
| H | -1.255179 | -0.393437 | 3.749386  |
| C | 2.044033  | -0.129427 | 4.579244  |
| H | 3.702355  | -0.550699 | 3.255703  |
| H | 0.210832  | 0.221381  | 5.664331  |
| H | 2.685218  | 0.161017  | 5.415089  |
| C | -0.488406 | -3.039183 | 0.742437  |
| C | 0.455886  | -3.854743 | 1.377210  |
| C | -1.382417 | -3.610293 | -0.174544 |
| C | 0.513047  | -5.215786 | 1.084488  |
| H | 1.140766  | -3.427880 | 2.112815  |
| C | -1.317956 | -4.968502 | -0.472829 |
| H | -2.141517 | -2.984441 | -0.654621 |
| C | -0.369573 | -5.772881 | 0.158678  |
| H | 1.246598  | -5.848666 | 1.589458  |
| H | -2.018510 | -5.404362 | -1.188841 |
| H | -0.326034 | -6.842165 | -0.061900 |
| O | -3.968989 | -1.063553 | 1.487800  |
| C | -4.235758 | -0.559602 | 2.693535  |
| O | -3.385104 | -0.105603 | 3.418968  |
| C | -5.686756 | -0.655871 | 3.059872  |
| H | -5.838832 | -1.585055 | 3.631109  |
| H | -5.954245 | 0.187236  | 3.707851  |
| H | -6.332998 | -0.692876 | 2.174405  |

**I-4**Lowest frequency = 12.8958 cm<sup>-1</sup>

Charge = 1, Multiplicity = 1

95

|    |           |           |           |
|----|-----------|-----------|-----------|
| Ru | -0.121660 | -1.211113 | -0.350593 |
| O  | 0.285972  | -2.398653 | -2.085163 |
| C  | -0.062310 | -3.470609 | -1.504592 |
| O  | -0.434379 | -3.324712 | -0.307920 |
| C  | -0.004017 | -4.794136 | -2.173235 |
| H  | -0.628919 | -5.521859 | -1.642135 |
| H  | -0.315096 | -4.700968 | -3.222050 |
| H  | 1.038578  | -5.148084 | -2.162168 |
| N  | -2.244277 | -1.114633 | -0.577193 |
| C  | -2.779307 | -0.003920 | -1.147925 |
| C  | -3.036476 | -2.004449 | 0.063147  |
| C  | -4.143126 | 0.220327  | -0.931685 |
| C  | -1.943001 | 0.869885  | -1.979181 |
| N  | -4.330152 | -1.888688 | 0.276894  |
| H  | -2.530585 | -2.900553 | 0.428633  |
| C  | -4.851141 | -0.764930 | -0.204621 |
| N  | -4.988452 | 1.227876  | -1.312894 |
| C  | -0.963588 | 0.302874  | -2.808812 |
| C  | -2.090729 | 2.261396  | -1.936402 |
| N  | -6.140895 | -0.324623 | -0.151474 |
| C  | -6.147617 | 0.871824  | -0.829509 |
| C  | -0.109422 | 1.119562  | -3.546545 |
| H  | -0.901103 | -0.781348 | -2.920792 |
| C  | -1.225399 | 3.070650  | -2.665311 |
| H  | -2.863898 | 2.706642  | -1.311530 |
| C  | -7.291016 | -0.984323 | 0.477663  |
| H  | -7.071294 | 1.444393  | -0.933721 |
| C  | -0.228304 | 2.506137  | -3.462886 |
| H  | 0.637881  | 0.669232  | -4.204270 |
| H  | -1.330638 | 4.155697  | -2.605037 |
| C  | -7.585492 | -2.310722 | -0.207511 |
| C  | -7.071065 | -1.120599 | 1.977136  |
| H  | -8.133536 | -0.296327 | 0.301429  |
| H  | 0.442822  | 3.149697  | -4.036383 |
| H  | -8.494008 | -2.756556 | 0.221566  |
| H  | -7.748453 | -2.172218 | -1.286176 |
| H  | -6.753727 | -3.014976 | -0.062882 |
| H  | -6.224706 | -1.790947 | 2.185104  |

|   |           |           |           |
|---|-----------|-----------|-----------|
| H | -7.969628 | -1.544209 | 2.447602  |
| H | -6.871173 | -0.142924 | 2.439554  |
| N | 1.918631  | -1.093934 | -0.309012 |
| C | 2.506314  | -1.179070 | 0.909611  |
| C | 2.646048  | -0.853071 | -1.421447 |
| C | 3.888681  | -0.979441 | 0.962871  |
| C | 1.582413  | -1.463934 | 1.977811  |
| N | 3.949226  | -0.684505 | -1.461467 |
| H | 2.084405  | -0.811556 | -2.356405 |
| C | 4.538748  | -0.744269 | -0.269989 |
| N | 4.792176  | -0.975864 | 1.988771  |
| C | 1.947190  | -1.603434 | 3.324716  |
| C | 0.235245  | -1.596371 | 1.570144  |
| N | 5.862626  | -0.610702 | 0.038306  |
| C | 5.939646  | -0.756613 | 1.401729  |
| C | 0.963522  | -1.877353 | 4.265259  |
| H | 2.997136  | -1.493449 | 3.604148  |
| C | -0.738887 | -1.864286 | 2.528597  |
| C | 6.988546  | -0.447145 | -0.888748 |
| H | 6.901275  | -0.691213 | 1.913857  |
| C | -0.370332 | -2.004763 | 3.867122  |
| H | 1.231146  | -1.989028 | 5.317799  |
| H | -1.790837 | -1.949260 | 2.256259  |
| C | 7.114059  | -1.671028 | -1.785194 |
| C | 6.867103  | 0.851403  | -1.670690 |
| H | 7.875911  | -0.389652 | -0.237980 |
| H | -1.141171 | -2.210251 | 4.613887  |
| H | 8.008617  | -1.579610 | -2.417407 |
| H | 7.207803  | -2.590793 | -1.189694 |
| H | 6.236124  | -1.762051 | -2.440932 |
| H | 5.962683  | 0.844127  | -2.295561 |
| H | 7.741406  | 0.971229  | -2.325914 |
| H | 6.823767  | 1.716526  | -0.995117 |
| O | -0.357419 | 0.546559  | 0.253186  |
| P | 0.143756  | 1.455476  | 1.531087  |
| C | -0.914077 | 2.914842  | 1.228792  |
| C | -0.449801 | 4.155523  | 0.782305  |
| C | -2.283655 | 2.739523  | 1.475756  |
| C | -1.349716 | 5.197538  | 0.558522  |
| H | 0.615967  | 4.308411  | 0.599215  |
| C | -3.180785 | 3.776123  | 1.238837  |
| H | -2.648350 | 1.776323  | 1.845540  |
| C | -2.713487 | 5.007802  | 0.776371  |
| H | -0.981621 | 6.164910  | 0.208539  |

|   |           |          |           |
|---|-----------|----------|-----------|
| H | -4.247893 | 3.626873 | 1.418046  |
| H | -3.414795 | 5.825798 | 0.596378  |
| C | 1.811845  | 2.006077 | 1.043495  |
| C | 2.771674  | 2.176972 | 2.047039  |
| C | 2.155657  | 2.234075 | -0.296859 |
| C | 4.058868  | 2.600297 | 1.720202  |
| H | 2.510397  | 1.970774 | 3.088636  |
| C | 3.446186  | 2.643200 | -0.620495 |
| H | 1.406944  | 2.092400 | -1.081261 |
| C | 4.393408  | 2.835436 | 0.388028  |
| H | 4.801785  | 2.741569 | 2.508184  |
| H | 3.715160  | 2.819506 | -1.664628 |
| H | 5.398334  | 3.178522 | 0.132041  |

### I-5

Lowest frequency = 15.4997 cm<sup>-1</sup>

Charge = 1, Multiplicity = 1

95

|    |           |           |           |
|----|-----------|-----------|-----------|
| Ru | 0.166255  | 0.496813  | -0.842323 |
| O  | 0.448816  | 2.209553  | -2.142399 |
| C  | 0.358342  | 1.453764  | -3.149902 |
| O  | 0.157929  | 0.222000  | -2.910127 |
| C  | 0.508236  | 1.956687  | -4.540536 |
| H  | 0.070829  | 1.250657  | -5.256231 |
| H  | 0.046385  | 2.948028  | -4.633451 |
| H  | 1.581724  | 2.063078  | -4.761058 |
| N  | -1.993025 | 0.680639  | -0.959993 |
| C  | -2.808022 | 1.406223  | -0.141234 |
| C  | -2.518438 | -0.293151 | -1.742632 |
| C  | -4.129816 | 0.940054  | -0.016006 |
| C  | -2.361178 | 2.642348  | 0.513845  |
| N  | -3.746728 | -0.763059 | -1.712159 |
| H  | -1.827079 | -0.725920 | -2.467236 |
| C  | -4.513732 | -0.163582 | -0.807957 |
| N  | -5.191376 | 1.353769  | 0.748299  |
| C  | -1.395261 | 3.457537  | -0.091969 |
| C  | -2.957636 | 3.073394  | 1.712078  |
| N  | -5.817023 | -0.415706 | -0.493396 |
| C  | -6.154378 | 0.527056  | 0.446556  |
| C  | -0.999166 | 4.647276  | 0.506987  |
| H  | -0.961225 | 3.170728  | -1.047597 |

|   |           |           |           |
|---|-----------|-----------|-----------|
| C | -2.547627 | 4.257212  | 2.313612  |
| H | -3.755925 | 2.482499  | 2.157979  |
| C | -6.682751 | -1.466913 | -1.035613 |
| H | -7.156762 | 0.548924  | 0.878224  |
| C | -1.561435 | 5.044409  | 1.718845  |
| H | -0.248998 | 5.272085  | 0.017313  |
| H | -3.011265 | 4.575199  | 3.250033  |
| C | -6.907484 | -1.262552 | -2.526656 |
| C | -6.120331 | -2.840345 | -0.697600 |
| H | -7.641481 | -1.335296 | -0.508443 |
| H | -1.245853 | 5.977297  | 2.191857  |
| H | -7.614792 | -2.015161 | -2.903112 |
| H | -7.326365 | -0.266450 | -2.730150 |
| H | -5.962487 | -1.367151 | -3.078480 |
| H | -5.157011 | -2.997425 | -1.204117 |
| H | -6.817242 | -3.622391 | -1.030767 |
| H | -5.971729 | -2.949353 | 0.386861  |
| N | 2.196264  | 0.395496  | -0.745461 |
| C | 2.760474  | -0.827313 | -0.894926 |
| C | 2.935890  | 1.486709  | -0.458287 |
| C | 4.149773  | -0.900454 | -0.754825 |
| C | 1.817716  | -1.903962 | -1.102353 |
| N | 4.240783  | 1.497216  | -0.284357 |
| H | 2.379829  | 2.421908  | -0.357320 |
| C | 4.813977  | 0.306330  | -0.434648 |
| N | 5.042068  | -1.936281 | -0.809234 |
| C | 2.214420  | -3.220899 | -1.371835 |
| C | 0.452483  | -1.555289 | -0.970392 |
| N | 6.130824  | -0.030640 | -0.297651 |
| C | 6.193314  | -1.381345 | -0.535648 |
| C | 1.251084  | -4.211909 | -1.512168 |
| H | 3.279860  | -3.444286 | -1.455771 |
| C | -0.494900 | -2.570386 | -1.104382 |
| C | 7.248418  | 0.850261  | 0.058409  |
| H | 7.147238  | -1.909968 | -0.490784 |
| C | -0.098078 | -3.882904 | -1.379377 |
| H | 1.548882  | -5.240418 | -1.724882 |
| H | -1.559822 | -2.362606 | -1.001695 |
| C | 7.430281  | 1.936727  | -0.990969 |
| C | 7.059179  | 1.401055  | 1.464723  |
| H | 8.132829  | 0.192989  | 0.048377  |
| H | -0.861357 | -4.657574 | -1.489263 |
| H | 8.316925  | 2.540309  | -0.750572 |
| H | 7.573066  | 1.501137  | -1.990507 |

|   |           |           |           |
|---|-----------|-----------|-----------|
| H | 6.555305  | 2.601738  | -1.016504 |
| H | 6.168594  | 2.044358  | 1.511152  |
| H | 7.933931  | 2.001448  | 1.752008  |
| H | 6.948452  | 0.586526  | 2.195799  |
| P | 0.040427  | -0.281621 | 1.250908  |
| O | 0.216527  | 1.263825  | 1.182722  |
| C | -1.493156 | -0.811746 | 2.020181  |
| C | -2.140042 | 0.124990  | 2.836470  |
| C | -2.049485 | -2.082497 | 1.822352  |
| C | -3.354123 | -0.204663 | 3.432200  |
| H | -1.697250 | 1.111179  | 2.987345  |
| C | -3.266808 | -2.398039 | 2.419466  |
| H | -1.543822 | -2.823446 | 1.202943  |
| C | -3.921584 | -1.459492 | 3.217593  |
| H | -3.861647 | 0.526937  | 4.064315  |
| H | -3.703901 | -3.386736 | 2.263308  |
| H | -4.876554 | -1.712170 | 3.684002  |
| C | 1.469792  | -1.073617 | 1.994513  |
| C | 2.499474  | -0.243008 | 2.454711  |
| C | 1.604376  | -2.466341 | 2.040516  |
| C | 3.667913  | -0.812801 | 2.953221  |
| H | 2.378269  | 0.841370  | 2.411969  |
| C | 2.778823  | -3.024267 | 2.534443  |
| H | 0.811890  | -3.117689 | 1.665387  |
| C | 3.810189  | -2.199717 | 2.985761  |
| H | 4.470747  | -0.167525 | 3.316851  |
| H | 2.893984  | -4.109636 | 2.558420  |
| H | 4.731169  | -2.644787 | 3.369055  |

### TS(5-6)

Lowest frequency = -127.7435 cm<sup>-1</sup>

Charge = 1, Multiplicity = 1

95

scf done: -2720.126539

|    |           |           |           |
|----|-----------|-----------|-----------|
| Ru | -0.001914 | -1.066800 | -0.009383 |
| O  | -0.106245 | -3.056401 | 0.660761  |
| C  | -0.078348 | -3.479472 | -0.536405 |
| O  | -0.018087 | -2.594559 | -1.440050 |
| C  | -0.085423 | -4.934297 | -0.848852 |
| H  | -0.410273 | -5.104607 | -1.882083 |
| H  | 0.937569  | -5.324539 | -0.731401 |
| H  | -0.729879 | -5.471248 | -0.140988 |

|   |           |           |           |
|---|-----------|-----------|-----------|
| N | 2.123810  | -1.101716 | -0.013966 |
| C | 2.979046  | -0.836558 | 1.009266  |
| C | 2.600091  | -1.216092 | -1.281288 |
| C | 4.319505  | -0.589537 | 0.655302  |
| C | 2.550589  | -0.839543 | 2.415368  |
| N | 3.836532  | -1.025991 | -1.689335 |
| H | 1.855484  | -1.494503 | -2.029792 |
| C | 4.668928  | -0.698051 | -0.707280 |
| N | 5.429226  | -0.272160 | 1.396642  |
| C | 1.579118  | -1.740075 | 2.872658  |
| C | 3.161023  | 0.031802  | 3.333974  |
| N | 6.007265  | -0.434488 | -0.773042 |
| C | 6.393235  | -0.186740 | 0.521346  |
| C | 1.200573  | -1.741747 | 4.210270  |
| H | 1.130114  | -2.452472 | 2.182581  |
| C | 2.764046  | 0.037148  | 4.666450  |
| H | 3.956651  | 0.697373  | 2.999480  |
| C | 6.864208  | -0.438989 | -1.961702 |
| H | 7.431687  | 0.055179  | 0.755509  |
| C | 1.778555  | -0.845342 | 5.107803  |
| H | 0.447845  | -2.454363 | 4.554674  |
| H | 3.236369  | 0.727781  | 5.368531  |
| C | 6.931241  | -1.833724 | -2.567194 |
| C | 6.404863  | 0.620266  | -2.953412 |
| H | 7.862860  | -0.164848 | -1.584897 |
| H | 1.473313  | -0.844628 | 6.156869  |
| H | 7.633859  | -1.840289 | -3.412669 |
| H | 7.278027  | -2.569507 | -1.827216 |
| H | 5.942475  | -2.143028 | -2.935272 |
| H | 5.402076  | 0.379993  | -3.335198 |
| H | 7.098932  | 0.660329  | -3.804950 |
| H | 6.377815  | 1.615201  | -2.485212 |
| N | -2.036753 | -0.986442 | -0.154677 |
| C | -2.524579 | -0.275298 | -1.198110 |
| C | -2.872634 | -1.574812 | 0.726600  |
| C | -3.908014 | -0.196148 | -1.345296 |
| C | -1.512877 | 0.384064  | -2.021279 |
| N | -4.190734 | -1.515531 | 0.688747  |
| H | -2.388643 | -2.136953 | 1.529035  |
| C | -4.675949 | -0.830276 | -0.337292 |
| N | -4.720646 | 0.431894  | -2.246349 |
| C | -1.681172 | 0.574350  | -3.388708 |
| C | -0.279489 | 0.729882  | -1.386376 |
| N | -5.978552 | -0.561991 | -0.658021 |



|   |           |           |           |
|---|-----------|-----------|-----------|
| C | -5.928677 | 0.188730  | -1.804393 |
| C | -0.615533 | 1.052190  | -4.155200 |
| H | -2.635814 | 0.316769  | -3.850390 |
| C | 0.773864  | 1.204218  | -2.189423 |
| C | -7.182814 | -0.966098 | 0.076459  |
| H | -6.847800 | 0.537006  | -2.279383 |
| C | 0.615520  | 1.339516  | -3.565038 |
| H | -0.745989 | 1.185618  | -5.231574 |
| H | 1.721825  | 1.481472  | -1.724426 |
| C | -7.299908 | -2.482363 | 0.119233  |
| C | -7.199681 | -0.324803 | 1.456621  |
| H | -8.017920 | -0.559794 | -0.516723 |
| H | 1.450745  | 1.686599  | -4.176568 |
| H | -8.243601 | -2.767904 | 0.605130  |
| H | -7.293633 | -2.908970 | -0.894261 |
| H | -6.469946 | -2.919611 | 0.692367  |
| H | -6.363326 | -0.696723 | 2.065917  |
| H | -8.138960 | -0.572141 | 1.971142  |
| H | -7.124782 | 0.770000  | 1.383980  |
| P | -0.328454 | 1.387341  | 0.416633  |
| O | -0.068772 | 0.409009  | 1.580728  |
| C | 0.890325  | 2.713799  | 0.472263  |
| C | 1.827517  | 2.646918  | 1.507893  |
| C | 0.894508  | 3.796346  | -0.417897 |
| C | 2.783181  | 3.653328  | 1.638313  |
| H | 1.794733  | 1.807521  | 2.205006  |
| C | 1.846601  | 4.799033  | -0.275239 |
| H | 0.165603  | 3.858651  | -1.228680 |
| C | 2.793936  | 4.725338  | 0.749435  |
| H | 3.518386  | 3.597236  | 2.444189  |
| H | 1.851741  | 5.644876  | -0.965996 |
| H | 3.540984  | 5.515394  | 0.855156  |
| C | -2.001616 | 2.058187  | 0.558264  |
| C | -2.727250 | 1.693899  | 1.697490  |
| C | -2.582434 | 2.875198  | -0.419122 |
| C | -4.040302 | 2.136535  | 1.846982  |
| H | -2.256928 | 1.053969  | 2.447355  |
| C | -3.891361 | 3.316652  | -0.260117 |
| H | -2.032866 | 3.141244  | -1.324598 |
| C | -4.621253 | 2.943329  | 0.869925  |
| H | -4.611298 | 1.846062  | 2.731556  |
| H | -4.348726 | 3.943824  | -1.027727 |
| H | -5.650848 | 3.289144  | 0.989639  |

**I-6**Lowest frequency = 14.1755 cm<sup>-1</sup>

Charge = 1, Multiplicity = 1

95

|    |           |           |           |
|----|-----------|-----------|-----------|
| Ru | 0.014496  | -0.854164 | 0.750671  |
| O  | 0.053725  | -1.731913 | 2.651348  |
| C  | 0.087356  | -2.891870 | 2.137066  |
| O  | 0.063246  | -2.941787 | 0.870074  |
| C  | 0.182983  | -4.117107 | 2.974042  |
| H  | -0.165172 | -4.993719 | 2.414937  |
| H  | 1.237936  | -4.271577 | 3.249790  |
| H  | -0.389766 | -3.989448 | 3.901475  |
| N  | 2.139221  | -0.927546 | 0.543620  |
| C  | 3.076972  | -0.033124 | 0.953705  |
| C  | 2.493337  | -1.937310 | -0.293960 |
| C  | 4.363568  | -0.173588 | 0.399034  |
| C  | 2.798092  | 0.999210  | 1.961473  |
| N  | 3.675265  | -2.156014 | -0.828977 |
| H  | 1.695199  | -2.639577 | -0.537327 |
| C  | 4.583690  | -1.253336 | -0.481980 |
| N  | 5.526147  | 0.536582  | 0.563647  |
| C  | 1.922407  | 0.748051  | 3.026967  |
| C  | 3.480954  | 2.226719  | 1.912235  |
| N  | 5.895927  | -1.175199 | -0.850887 |
| C  | 6.395233  | -0.080340 | -0.188807 |
| C  | 1.711619  | 1.714122  | 4.003981  |
| H  | 1.416948  | -0.213877 | 3.103339  |
| C  | 3.263757  | 3.189178  | 2.892125  |
| H  | 4.188349  | 2.420383  | 1.107042  |
| C  | 6.628074  | -2.072889 | -1.748405 |
| H  | 7.439823  | 0.213500  | -0.308201 |
| C  | 2.374181  | 2.939126  | 3.937179  |
| H  | 1.028406  | 1.503250  | 4.829309  |
| H  | 3.799601  | 4.139993  | 2.843193  |
| C  | 6.698430  | -3.475463 | -1.161827 |
| C  | 6.021148  | -2.039865 | -3.143989 |
| H  | 7.645761  | -1.652449 | -1.792464 |
| H  | 2.208852  | 3.695004  | 4.708627  |
| H  | 7.311426  | -4.119879 | -1.807951 |
| H  | 7.152404  | -3.462672 | -0.160353 |
| H  | 5.692998  | -3.914134 | -1.087833 |

|   |           |           |           |
|---|-----------|-----------|-----------|
| H | 4.996493  | -2.438747 | -3.126538 |
| H | 6.621215  | -2.657521 | -3.827214 |
| H | 5.997291  | -1.014130 | -3.540589 |
| N | -2.020384 | -0.917973 | 0.714148  |
| C | -2.247348 | -1.046029 | -0.601972 |
| C | -3.014901 | -0.910761 | 1.612738  |
| C | -3.554933 | -1.218679 | -1.031356 |
| C | -0.960818 | -0.984785 | -1.338917 |
| N | -4.294177 | -1.036888 | 1.301306  |
| H | -2.726232 | -0.797016 | 2.660545  |
| C | -4.530488 | -1.186139 | 0.005254  |
| N | -4.149236 | -1.372924 | -2.251055 |
| C | -0.649982 | -2.011301 | -2.277730 |
| C | -0.121279 | 0.186894  | -1.285410 |
| N | -5.729298 | -1.331690 | -0.636236 |
| C | -5.424924 | -1.438001 | -1.971096 |
| C | 0.467688  | -1.924951 | -3.067786 |
| H | -1.325523 | -2.864412 | -2.354709 |
| C | 1.023820  | 0.236558  | -2.138075 |
| C | -7.065660 | -1.402954 | -0.033376 |
| H | -6.218743 | -1.566873 | -2.709546 |
| C | 1.320607  | -0.797471 | -2.989065 |
| H | 0.695312  | -2.726291 | -3.773841 |
| H | 1.660782  | 1.123516  | -2.109276 |
| C | -7.175940 | -2.622317 | 0.870419  |
| C | -7.404208 | -0.101057 | 0.676989  |
| H | -7.747906 | -1.530496 | -0.889313 |
| H | 2.205923  | -0.741461 | -3.625336 |
| H | -8.203110 | -2.710292 | 1.251709  |
| H | -6.933522 | -3.544912 | 0.323273  |
| H | -6.495870 | -2.530953 | 1.729402  |
| H | -6.717945 | 0.070730  | 1.518516  |
| H | -8.429721 | -0.148888 | 1.069599  |
| H | -7.338301 | 0.752803  | -0.011827 |
| P | -0.580975 | 1.648181  | -0.319688 |
| O | -0.240192 | 1.273540  | 1.135332  |
| C | 0.343128  | 3.091395  | -0.852296 |
| C | 1.107897  | 3.746786  | 0.116916  |
| C | 0.286028  | 3.577291  | -2.165999 |
| C | 1.825055  | 4.889172  | -0.233717 |
| H | 1.137149  | 3.355203  | 1.135272  |
| C | 1.010449  | 4.714082  | -2.506602 |
| H | -0.317345 | 3.072360  | -2.924561 |
| C | 1.778725  | 5.369293  | -1.540549 |

|   |           |          |           |
|---|-----------|----------|-----------|
| H | 2.423809  | 5.402221 | 0.521975  |
| H | 0.974542  | 5.095748 | -3.529162 |
| H | 2.342914  | 6.264220 | -1.812999 |
| C | -2.335158 | 1.979003 | -0.571328 |
| C | -3.115699 | 2.302051 | 0.543504  |
| C | -2.908333 | 1.921732 | -1.847415 |
| C | -4.471623 | 2.573957 | 0.376029  |
| H | -2.655837 | 2.326752 | 1.534540  |
| C | -4.262355 | 2.199447 | -2.007026 |
| H | -2.311273 | 1.627736 | -2.714740 |
| C | -5.041084 | 2.527553 | -0.896518 |
| H | -5.086604 | 2.823189 | 1.243450  |
| H | -4.712334 | 2.149694 | -3.000605 |
| H | -6.102388 | 2.752686 | -1.025538 |

### I-5<sup>III</sup>

Lowest frequency = 15.0030 cm<sup>-1</sup>

Charge = 0, Multiplicity = 2

95

|    |           |           |           |
|----|-----------|-----------|-----------|
| Ru | 0.197771  | -0.234424 | 0.766573  |
| O  | -0.129269 | 0.824985  | 2.663644  |
| C  | 0.056370  | -0.218190 | 3.372358  |
| O  | 0.342742  | -1.300951 | 2.815929  |
| C  | -0.102127 | -0.122027 | 4.861173  |
| H  | 0.247603  | -1.038834 | 5.349711  |
| H  | 0.445893  | 0.751533  | 5.240680  |
| H  | -1.166224 | 0.032688  | 5.096315  |
| N  | 2.311835  | -0.287560 | 0.774182  |
| C  | 3.168038  | 0.635266  | 0.274511  |
| C  | 2.751411  | -1.541607 | 1.062905  |
| C  | 4.452892  | 0.183236  | -0.064369 |
| C  | 2.818252  | 2.055489  | 0.230151  |
| N  | 3.952950  | -2.026093 | 0.832765  |
| H  | 2.011890  | -2.193722 | 1.530143  |
| C  | 4.763661  | -1.157852 | 0.236056  |
| N  | 5.545398  | 0.810685  | -0.610729 |
| C  | 2.139146  | 2.623591  | 1.314297  |
| C  | 3.259627  | 2.870873  | -0.822511 |
| N  | 6.060442  | -1.334729 | -0.156989 |
| C  | 6.459212  | -0.116996 | -0.658365 |
| C  | 1.914039  | 3.997530  | 1.351499  |

|   |           |           |           |
|---|-----------|-----------|-----------|
| H | 1.787794  | 1.990785  | 2.130761  |
| C | 3.014013  | 4.235204  | -0.784725 |
| H | 3.769294  | 2.418169  | -1.671177 |
| C | 6.856130  | -2.557683 | -0.068989 |
| H | 7.468694  | 0.015509  | -1.052391 |
| C | 2.348438  | 4.803432  | 0.304525  |
| H | 1.381902  | 4.434102  | 2.198771  |
| H | 3.336147  | 4.865512  | -1.616527 |
| C | 7.061978  | -2.958827 | 1.385360  |
| C | 6.225337  | -3.663192 | -0.904858 |
| H | 7.831502  | -2.290189 | -0.507888 |
| H | 2.155211  | 5.878276  | 0.326222  |
| H | 7.714411  | -3.842179 | 1.442949  |
| H | 7.531603  | -2.144238 | 1.955949  |
| H | 6.097988  | -3.204967 | 1.853260  |
| H | 5.237466  | -3.930735 | -0.502611 |
| H | 6.863227  | -4.558739 | -0.887231 |
| H | 6.103712  | -3.345190 | -1.950675 |
| N | -1.849839 | -0.575934 | 0.787888  |
| C | -2.242874 | -1.695170 | 0.121851  |
| C | -2.746266 | 0.206745  | 1.418082  |
| C | -3.617998 | -1.972158 | 0.115216  |
| C | -1.191618 | -2.398961 | -0.570947 |
| N | -4.053014 | 0.030347  | 1.441391  |
| H | -2.326650 | 1.051684  | 1.965894  |
| C | -4.452657 | -1.048703 | 0.774772  |
| N | -4.370564 | -2.962968 | -0.463106 |
| C | -1.420648 | -3.538859 | -1.357331 |
| C | 0.082235  | -1.779960 | -0.498456 |
| N | -5.729843 | -1.500553 | 0.575645  |
| C | -5.602265 | -2.645099 | -0.172339 |
| C | -0.383344 | -4.057344 | -2.118320 |
| H | -2.419981 | -3.976764 | -1.381370 |
| C | 1.095993  | -2.300461 | -1.318550 |
| C | -6.972251 | -0.876661 | 1.024638  |
| H | -6.484805 | -3.210999 | -0.476088 |
| C | 0.862987  | -3.420376 | -2.112519 |
| H | -0.547187 | -4.940001 | -2.740363 |
| H | 2.057395  | -1.791116 | -1.391450 |
| C | -7.022044 | -0.812862 | 2.544870  |
| C | -7.149314 | 0.485943  | 0.367948  |
| H | -7.769825 | -1.550060 | 0.669682  |
| H | 1.667335  | -3.799512 | -2.749204 |
| H | -7.987560 | -0.400938 | 2.872532  |

|   |           |           |           |
|---|-----------|-----------|-----------|
| H | -6.905798 | -1.814253 | 2.984534  |
| H | -6.218027 | -0.167078 | 2.925783  |
| H | -6.345517 | 1.167998  | 0.680741  |
| H | -8.113911 | 0.924788  | 0.661568  |
| H | -7.128058 | 0.398996  | -0.728255 |
| P | 0.008694  | 1.004494  | -1.171050 |
| C | -1.520781 | 0.519122  | -2.079644 |
| C | -2.795258 | 0.999372  | -1.757842 |
| C | -1.384979 | -0.420255 | -3.106297 |
| C | -3.920516 | 0.510686  | -2.419007 |
| H | -2.911551 | 1.765259  | -0.987095 |
| C | -2.510111 | -0.908818 | -3.767202 |
| H | -0.382052 | -0.767110 | -3.366554 |
| C | -3.781051 | -0.454480 | -3.416830 |
| H | -4.911165 | 0.891385  | -2.156226 |
| H | -2.393716 | -1.656056 | -4.556047 |
| H | -4.663610 | -0.845618 | -3.929209 |
| C | -0.386692 | 2.769536  | -0.847121 |
| C | -0.112280 | 3.674827  | -1.877300 |
| C | -1.005503 | 3.223182  | 0.320116  |
| C | -0.484370 | 5.011251  | -1.752435 |
| H | 0.399431  | 3.308897  | -2.771342 |
| C | -1.383591 | 4.559770  | 0.442346  |
| H | -1.159535 | 2.534102  | 1.152444  |
| C | -1.128833 | 5.453865  | -0.596575 |
| H | -0.269820 | 5.714030  | -2.561812 |
| H | -1.868436 | 4.906615  | 1.358563  |
| H | -1.424947 | 6.501839  | -0.502133 |
| O | 1.200486  | 0.873056  | -2.109889 |

### TS(5-6)<sup>III</sup>

Lowest frequency = -218.7340 cm<sup>-1</sup>

Charge = 0, Multiplicity = 2

95

|    |           |          |           |
|----|-----------|----------|-----------|
| Ru | -0.133946 | 0.861876 | -0.595572 |
| O  | 0.024512  | 3.028834 | -1.361911 |
| C  | -0.056321 | 2.556861 | -2.522273 |
| O  | -0.209180 | 1.306626 | -2.673464 |
| C  | 0.067553  | 3.435000 | -3.731584 |
| H  | -0.263036 | 4.454913 | -3.499236 |
| H  | 1.127227  | 3.474091 | -4.028294 |

|   |           |           |           |
|---|-----------|-----------|-----------|
| H | -0.504547 | 3.019929  | -4.570931 |
| N | -2.231007 | 0.945780  | -0.553539 |
| C | -2.931668 | 1.257655  | 0.557779  |
| C | -2.866880 | 0.456246  | -1.643662 |
| C | -4.301439 | 0.957431  | 0.554864  |
| C | -2.279801 | 1.944291  | 1.682381  |
| N | -4.150315 | 0.166388  | -1.743161 |
| H | -2.224879 | 0.283331  | -2.509987 |
| C | -4.830930 | 0.404344  | -0.627782 |
| N | -5.292077 | 1.104709  | 1.494788  |
| C | -1.350575 | 2.964661  | 1.433829  |
| C | -2.622092 | 1.625416  | 3.004011  |
| N | -6.163622 | 0.209663  | -0.379761 |
| C | -6.363109 | 0.647743  | 0.907424  |
| C | -0.769134 | 3.652878  | 2.497947  |
| H | -1.100895 | 3.239456  | 0.406839  |
| C | -2.028473 | 2.309280  | 4.059133  |
| H | -3.338354 | 0.826898  | 3.191773  |
| C | -7.163681 | -0.346931 | -1.287278 |
| H | -7.355087 | 0.599309  | 1.360858  |
| C | -1.103407 | 3.326061  | 3.810258  |
| H | -0.051781 | 4.450771  | 2.292710  |
| H | -2.286787 | 2.044664  | 5.086980  |
| C | -7.337395 | 0.548693  | -2.506506 |
| C | -6.810679 | -1.782072 | -1.654162 |
| H | -8.101471 | -0.347031 | -0.707366 |
| H | -0.645737 | 3.864237  | 4.644297  |
| H | -8.135558 | 0.155153  | -3.152647 |
| H | -7.606938 | 1.572296  | -2.207739 |
| H | -6.404311 | 0.586991  | -3.086836 |
| H | -5.864512 | -1.810781 | -2.213632 |
| H | -7.601727 | -2.215950 | -2.282962 |
| H | -6.703714 | -2.403687 | -0.753198 |
| N | 1.887590  | 0.718034  | -0.690454 |
| C | 2.368916  | -0.471826 | -1.161954 |
| C | 2.720761  | 1.722182  | -0.353153 |
| C | 3.770868  | -0.569085 | -1.293506 |
| C | 1.374490  | -1.459825 | -1.437096 |
| N | 4.036876  | 1.700979  | -0.421945 |
| H | 2.229669  | 2.631435  | 0.003273  |
| C | 4.520660  | 0.547786  | -0.890583 |
| N | 4.602200  | -1.587257 | -1.683485 |
| C | 1.613522  | -2.561599 | -2.282936 |
| C | 0.043395  | -1.178619 | -0.910322 |

|   |           |           |           |
|---|-----------|-----------|-----------|
| N | 5.834395  | 0.183559  | -1.050757 |
| C | 5.807477  | -1.101712 | -1.527161 |
| C | 0.570834  | -3.373230 | -2.683675 |
| H | 2.632484  | -2.733194 | -2.637272 |
| C | -1.003348 | -2.050083 | -1.389198 |
| C | 7.014884  | 0.979456  | -0.729029 |
| H | 6.734070  | -1.636185 | -1.743252 |
| C | -0.745151 | -3.092614 | -2.244974 |
| H | 0.756439  | -4.217498 | -3.350511 |
| H | -2.015168 | -1.903385 | -1.004710 |
| C | 7.051750  | 2.248698  | -1.569170 |
| C | 7.072724  | 1.260435  | 0.767268  |
| H | 7.871246  | 0.342617  | -1.006455 |
| H | -1.570249 | -3.727031 | -2.579507 |
| H | 7.974647  | 2.810554  | -1.363993 |
| H | 7.022815  | 2.009591  | -2.642303 |
| H | 6.189902  | 2.887657  | -1.329034 |
| H | 6.202789  | 1.858887  | 1.074586  |
| H | 7.988445  | 1.817564  | 1.013493  |
| H | 7.073913  | 0.322598  | 1.342383  |
| P | -0.118568 | -1.330872 | 1.056072  |
| C | 0.110563  | -3.133630 | 1.279345  |
| C | 1.172553  | -3.893387 | 0.776416  |
| C | -0.902733 | -3.763815 | 2.010771  |
| C | 1.222584  | -5.265021 | 1.013459  |
| H | 1.952699  | -3.428614 | 0.172927  |
| C | -0.848110 | -5.136112 | 2.244934  |
| H | -1.727519 | -3.151428 | 2.383272  |
| C | 0.214790  | -5.888716 | 1.748164  |
| H | 2.052928  | -5.851177 | 0.612476  |
| H | -1.642035 | -5.620250 | 2.819257  |
| H | 0.256985  | -6.965522 | 1.930114  |
| C | 1.276244  | -0.559760 | 1.938033  |
| C | 0.971834  | 0.572913  | 2.703228  |
| C | 2.602134  | -1.005980 | 1.862002  |
| C | 1.987042  | 1.275495  | 3.347195  |
| H | -0.068464 | 0.889360  | 2.792599  |
| C | 3.613849  | -0.292501 | 2.499868  |
| H | 2.855241  | -1.908219 | 1.305986  |
| C | 3.311204  | 0.852989  | 3.235851  |
| H | 1.734818  | 2.158655  | 3.938353  |
| H | 4.647586  | -0.638016 | 2.422591  |
| H | 4.109485  | 1.411460  | 3.730655  |
| O | -1.464203 | -0.951319 | 1.632603  |



**I-6<sup>1</sup>**Lowest frequency = 12.9615 cm<sup>-1</sup>

Charge = 0, Multiplicity = 2

95

|    |           |           |           |
|----|-----------|-----------|-----------|
| Ru | 0.269156  | -0.549960 | -0.114819 |
| O  | -0.470508 | -2.949014 | -2.057053 |
| C  | -0.015783 | -1.985820 | -2.665984 |
| O  | 0.492646  | -0.933329 | -2.114973 |
| C  | -0.013960 | -1.936977 | -4.179543 |
| H  | 1.000041  | -1.724699 | -4.547958 |
| H  | -0.378638 | -2.883602 | -4.596059 |
| H  | -0.655846 | -1.108121 | -4.515534 |
| N  | 2.363276  | -0.370619 | -0.167972 |
| C  | 3.216852  | -1.275957 | 0.356540  |
| C  | 2.835115  | 0.720534  | -0.811666 |
| C  | 4.588052  | -0.984681 | 0.271890  |
| C  | 2.692967  | -2.505087 | 0.967614  |
| N  | 4.100333  | 1.054021  | -0.968954 |
| H  | 2.076539  | 1.376342  | -1.236692 |
| C  | 4.943916  | 0.200417  | -0.402841 |
| N  | 5.714924  | -1.640966 | 0.704241  |
| C  | 1.558738  | -3.138588 | 0.434798  |
| C  | 3.319190  | -3.054675 | 2.096684  |
| N  | 6.312157  | 0.249413  | -0.364588 |
| C  | 6.700158  | -0.879134 | 0.314337  |
| C  | 1.039593  | -4.275570 | 1.047913  |
| H  | 1.082386  | -2.796360 | -0.491724 |
| C  | 2.787892  | -4.186355 | 2.709060  |
| H  | 4.220381  | -2.584596 | 2.491795  |
| C  | 7.177402  | 1.287282  | -0.921069 |
| H  | 7.757942  | -1.083273 | 0.491113  |
| C  | 1.642549  | -4.794798 | 2.191913  |
| H  | 0.162791  | -4.755820 | 0.607513  |
| H  | 3.272862  | -4.596830 | 3.597807  |
| C  | 7.033012  | 1.347403  | -2.435729 |
| C  | 6.904346  | 2.625351  | -0.247486 |
| H  | 8.201560  | 0.963256  | -0.672151 |
| H  | 1.230786  | -5.684428 | 2.675018  |
| H  | 7.733840  | 2.085997  | -2.851323 |
| H  | 7.249342  | 0.370032  | -2.891403 |

|   |           |           |           |
|---|-----------|-----------|-----------|
| H | 6.009928  | 1.642988  | -2.709083 |
| H | 5.875881  | 2.954708  | -0.454441 |
| H | 7.599858  | 3.387254  | -0.628491 |
| H | 7.034227  | 2.551670  | 0.842109  |
| N | -1.734909 | -0.766852 | -0.421571 |
| C | -2.399431 | 0.251360  | -0.996192 |
| C | -2.386385 | -1.874912 | -0.005074 |
| C | -3.791561 | 0.126793  | -1.099452 |
| C | -1.643086 | 1.384935  | -1.570887 |
| N | -3.685575 | -2.084683 | -0.079069 |
| H | -1.751457 | -2.650424 | 0.425390  |
| C | -4.355920 | -1.070368 | -0.611464 |
| N | -4.773591 | 0.962147  | -1.570603 |
| C | -1.949253 | 1.692102  | -2.904980 |
| C | -0.603462 | 2.097147  | -0.923674 |
| N | -5.706879 | -0.940429 | -0.803514 |
| C | -5.879949 | 0.295182  | -1.376131 |
| C | -1.218466 | 2.635657  | -3.617238 |
| H | -2.762120 | 1.151931  | -3.392500 |
| C | 0.119840  | 3.048737  | -1.661697 |
| C | -6.747026 | -1.907684 | -0.458691 |
| H | -6.879716 | 0.653175  | -1.629320 |
| C | -0.167251 | 3.306115  | -2.997194 |
| H | -1.466170 | 2.837335  | -4.661682 |
| H | 0.920016  | 3.588346  | -1.147453 |
| C | -6.563461 | -3.193946 | -1.252361 |
| C | -6.779336 | -2.140112 | 1.045960  |
| H | -7.690875 | -1.428153 | -0.766722 |
| H | 0.422606  | 4.041883  | -3.548664 |
| H | -7.384541 | -3.891685 | -1.032740 |
| H | -6.560298 | -2.992692 | -2.333547 |
| H | -5.612789 | -3.676716 | -0.983919 |
| H | -5.836017 | -2.594497 | 1.381711  |
| H | -7.605278 | -2.818535 | 1.304367  |
| H | -6.926153 | -1.194230 | 1.587827  |
| P | -0.133843 | 2.156619  | 0.856779  |
| C | -1.286878 | 3.403547  | 1.528277  |
| C | -2.597117 | 3.572389  | 1.065948  |
| C | -0.808043 | 4.205672  | 2.569559  |
| C | -3.426836 | 4.522918  | 1.657972  |
| H | -2.974964 | 2.975681  | 0.230557  |
| C | -1.640453 | 5.155334  | 3.157470  |
| H | 0.227732  | 4.080695  | 2.895435  |
| C | -2.950765 | 5.311546  | 2.705192  |

|   |           |           |          |
|---|-----------|-----------|----------|
| H | -4.447974 | 4.653864  | 1.291830 |
| H | -1.263104 | 5.782220  | 3.969193 |
| H | -3.602060 | 6.058901  | 3.165229 |
| C | -0.526527 | 0.578542  | 1.618955 |
| C | 0.556010  | -0.266832 | 2.048105 |
| C | -1.848201 | 0.320257  | 2.131367 |
| C | 0.236662  | -1.394127 | 2.874027 |
| H | 1.566749  | 0.145948  | 2.102044 |
| C | -2.103109 | -0.784995 | 2.894016 |
| H | -2.653210 | 1.027391  | 1.919006 |
| C | -1.049721 | -1.674104 | 3.248363 |
| H | 1.055063  | -2.024796 | 3.227701 |
| H | -3.114448 | -0.966212 | 3.266538 |
| H | -1.260955 | -2.547920 | 3.868986 |
| O | 1.297968  | 2.595056  | 1.031423 |

#### Acetate

Lowest frequency = 40.4371 cm<sup>-1</sup>

Charge = -1, Multiplicity = 1

7

|   |           |           |           |
|---|-----------|-----------|-----------|
| C | 0.278887  | -1.070415 | 0.000011  |
| O | 1.503675  | -1.297973 | 0.000004  |
| O | -0.331533 | 0.016875  | -0.000015 |
| C | -0.650467 | -2.333331 | 0.000066  |
| H | -1.312426 | -2.307191 | 0.883529  |
| H | -1.312534 | -2.307188 | -0.883315 |
| H | -0.074836 | -3.273163 | 0.000034  |

#### Acetic Acid

Lowest frequency = 79.7380 cm<sup>-1</sup>

Charge = 0, Multiplicity = 1

8

|   |           |           |           |
|---|-----------|-----------|-----------|
| C | 0.297073  | -1.163279 | 0.000013  |
| O | 1.496903  | -1.233142 | -0.000014 |
| O | -0.355861 | 0.010101  | 0.000001  |
| H | 0.326101  | 0.699363  | -0.000032 |
| C | -0.650394 | -2.324843 | 0.000066  |
| H | -1.301893 | -2.274652 | 0.884698  |

|   |           |           |           |
|---|-----------|-----------|-----------|
| H | -1.301985 | -2.274662 | -0.884498 |
| H | -0.083974 | -3.262061 | 0.000045  |

## 7. References

- (a) S. Shi, Z. Zheng, Y. Zhang, Y. Yang, D. Ma, Y. Gao, Y. Liu, G. Tang and Y. Zhao, Photoinduced Phosphorylation/Cyclization of Cyanoaromatics for Divergent Access to Mono- and Diphosphorylated Polyheterocycles. *Org. Lett.*, 2021, **23**, 9348-9352; (b) Y. Yin, W.-Z. Weng, J.-G. Sun and B. Zhang, Eosin Y-catalyzed, visible-light-promoted carbophosphinylation of allylic alcohols via a radical neophyl rearrangement. *Org. Biomol. Chem.*, 2018, **16**, 2356-2361.
- M. J. Frisch, G. W. Trucks, H. B. Schlegel, G. E. Scuseria, M. A. Robb, J. R. Cheeseman, G. Scalmani, V. Barone, G. A. Petersson, H. Nakatsuji, X. Li, M. Caricato, A. V. Marenich, J. Bloino, B. G. Janesko, R. Gomperts, B. Mennucci, H. P. Hratchian, J. V. Ortiz, A. F. Izmaylov, J. L. Sonnenberg, Williams, F. Ding, F. Lipparini, F. Egidi, J. Goings, B. Peng, A. Petrone, T. Henderson, D. Ranasinghe, V. G. Zakrzewski, J. Gao, N. Rega, G. Zheng, W. Liang, M. Hada, M. Ehara, K. Toyota, R. Fukuda, J. Hasegawa, M. Ishida, T. Nakajima, Y. Honda, O. Kitao, H. Nakai, T. Vreven, K. Throssell, J. A. Montgomery Jr., J. E. Peralta, F. Ogliaro, M. J. Bearpark, J. J. Heyd, E. N. Brothers, K. N. Kudin, V. N. Staroverov, T. A. Keith, R. Kobayashi, J. Normand, K. Raghavachari, A. P. Rendell, J. C. Burant, S. S. Iyengar, J. Tomasi, M. Cossi, J. M. Millam, M. Klene, C. Adamo, R. Cammi, J. W. Ochterski, R. L. Martin, K. Morokuma, O. Farkas, J. B. Foresman and D. J. Fox, *Gaussian 16 Rev. A.03*, Wallingford, CT, 2016.
- M. Ernzerhof and G. E. Scuseria, Assessment of the Perdew–Burke–Ernzerhof exchange–correlation functional, *J. Chem. Phys.*, 1999, **110**, 5029-5036.
- C. Adamo and V. Barone, Toward reliable density functional methods without adjustable parameters: The PBE0 model, *J. Chem. Phys.*, 1999, **110**, 6158-6170.
- S. Grimme, S. Ehrlich and L. Goerigk, Effect of the damping function in dispersion corrected density functional theory, *J. Comput. Chem.*, 2011, **32**, 1456-1465.
- S. Grimme, J. Antony, S. Ehrlich and H. Krieg, A consistent and accurate ab initio parametrization of density functional dispersion correction (DFT-D) for the 94 elements H–Pu, *J. Chem. Phys.*, 2010, **132**, 154104.
- F. Weigend, Accurate Coulomb-fitting basis sets for H to Rn, *Phys. Chem. Chem. Phys.*, 2006, **8**, 1057-1065.
- F. Weigend and R. Ahlrichs, Balanced basis sets of split valence, triple zeta valence and quadruple zeta valence quality for H to Rn: Design and assessment of accuracy, *Phys. Chem. Chem. Phys.*, 2005, **7**, 3297-3305.
- J. M. L. Martin and A. Sundermann, Correlation consistent valence basis sets for use with the Stuttgart–Dresden–Bonn relativistic effective core potentials: The atoms Ga–Kr and In–Xe, *J. Chem. Phys.*, 2001, **114**, 3408-3420.
- D. Andrae, U. Häußermann, M. Dolg, H. Stoll and H. Preuß, Energy-adjusted *ab initio* pseudopotentials for the second and third row transition elements, *Theor. Chim. Acta*, 1990, **77**, 123-141.
- M. Dolg, U. Wedig, H. Stoll and H. Preuss, Energy-adjusted *ab initio* pseudopotentials for the first row transition elements, *J. Chem. Phys.*, 1987, **86**, 866-872.
- E. Caldeweyher, S. Ehlert, A. Hansen, H. Neugebauer, S. Spicher, C. Bannwarth and S. Grimme, A generally applicable atomic-charge dependent London dispersion correction, *J. Chem. Phys.*, 2019, **150**, 154122.
- E. Caldeweyher, C. Bannwarth and S. Grimme, Extension of the D3 dispersion coefficient model, *J. Chem. Phys.*, 2017, **147**, 034112.

- 14 A. V. Marenich, C. J. Cramer and D. G. Truhlar, Universal Solvation Model Based on Solute Electron Density and on a Continuum Model of the Solvent Defined by the Bulk Dielectric Constant and Atomic Surface Tensions, *J. Phys. Chem. B*, 2009, **113**, 6378-6396.
- 15 A. K. Simlandy, W. Rodphon, T. M. Alturaifi, B. K. Mai, H.-Q. Ni, J. A. Gurak, Jr., P. Liu and K. M. Engle, Catalytic Addition of Nitroalkanes to Unactivated Alkenes via Directed Carbopalladation, *ACS Catal.*, 2022, **12**, 13755-13762.

## 8. Characterization Data

### (2-(9-Isopropyl-9H-purin-6-yl)phenyl)diphenylphosphine oxide (**3a**)

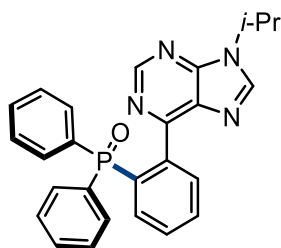

Prepared according to standard procedure A using  $[\text{Ru}(\text{OAc})_2(p\text{-cymene})]$  (10 mol %) on a 0.3 mmol scale, purification by column chromatography on silica gel (DCM/MeOH = 20/1,  $R_f = 0.13$ ) yielded **3a** (95.9 mg, 73%) as a colorless sticky oil.

$^1\text{H}$  NMR (400 MHz,  $\text{CDCl}_3$ )  $\delta$  8.47 (s, 1H), 7.93 (s, 1H), 7.85 – 7.73 (m, 2H), 7.58 – 7.49 (m, 5H), 7.45 – 7.39 (m, 1H), 7.19 – 7.08 (m, 6H), 4.68 (m, 6H), 1.46 (d,  $J = 6.8$  Hz, 6H).

$^{13}\text{C}$  NMR (101 MHz,  $\text{CDCl}_3$ )  $\delta$  156.0 (d,  $J = 3.3$  Hz) ( $\text{C}_q$ ), 150.7 ( $\text{C}_q$ ), 150.5 (CH), 141.9 (CH), 139.4 (d,  $J = 7.1$  Hz) ( $\text{C}_q$ ), 135.0 (d,  $J = 10.3$  Hz) (CH), 133.4 (d,  $J = 106.4$  Hz) ( $\text{C}_q$ ), 132.1 (d,  $J = 101.0$  Hz) ( $\text{C}_q$ ), 131.3 (CH), 131.2 (CH), 131.2 (CH), 130.4 (d,  $J = 2.7$  Hz) (CH), 128.6 (d,  $J = 12.0$  Hz) (CH), 127.3 (d,  $J = 12.3$  Hz) (CH), 46.9 (CH), 22.1 ( $\text{CH}_3$ ).

$^{31}\text{P}$  NMR (162 MHz,  $\text{CDCl}_3$ )  $\delta$  28.79.

HRMS (ESI)  $m/z$ :  $[\text{M}+\text{H}]^+$  Calcd for  $\text{C}_{26}\text{H}_{24}\text{N}_4\text{OP}$  439.1682; Found 439.1686.

IR (ATR): 2977, 1577, 1331, 1178, 931, 719, 535  $\text{cm}^{-1}$ .

### (2-(9-Methyl-9H-purin-6-yl)phenyl)diphenylphosphine oxide (**3b**)

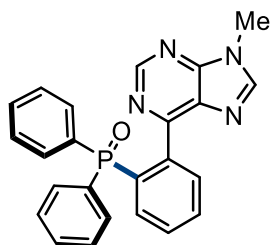

Prepared according to standard procedure A using  $[\text{Ru}(\text{OAc})_2(p\text{-cymene})]$  (10 mol %) on a 0.3 mmol scale, purification by column chromatography on silica gel (DCM/MeOH = 20/1,  $R_f = 0.14$ ) yielded **3b** (68.9 mg, 56%) as a colorless solid. M.p.: 210-211  $^\circ\text{C}$

$^1\text{H}$  NMR (300 MHz,  $\text{CDCl}_3$ )  $\delta$  8.50 (s, 1H), 7.94 – 7.86 (m, 2H), 7.72 (dd,  $J = 13.6, 7.7$  Hz, 1H), 7.63 – 7.50 (m, 5H), 7.45 (t,  $J = 7.6$  Hz, 1H), 7.26 – 7.14 (m, 6H), 3.71 (s, 3H).

$^{13}\text{C}$  NMR (75 MHz,  $\text{CDCl}_3$ )  $\delta$  156.2 (d,  $J = 3.1$  Hz) ( $\text{C}_q$ ), 151.7 ( $\text{C}_q$ ), 151.1 (CH), 145.0 (CH), 139.6 (d,  $J = 6.7$  Hz) ( $\text{C}_q$ ), 135.2 (d,  $J = 10.6$  Hz) (CH), 133.7 (d,  $J = 106.9$  Hz) ( $\text{C}_q$ ), 131.9 (d,  $J = 122.0$  Hz) ( $\text{C}_q$ ), 131.7 (CH), 131.5 (CH), 131.4 (CH), 130.8 (d,  $J = 2.8$  Hz) (CH), 129.0 (d,  $J = 12.1$  Hz) (CH), 127.7 (d,  $J = 12.3$  Hz) (CH), 29.6 ( $\text{CH}_3$ ).

$^{31}\text{P}$  NMR (121 MHz,  $\text{CDCl}_3$ )  $\delta$  29.61.

HRMS (ESI)  $m/z$ :  $[\text{M}+\text{H}]^+$  Calcd for  $\text{C}_{24}\text{H}_{20}\text{N}_4\text{OP}$  411.1369; Found 411.1376.

IR (ATR): 3058, 1715, 1581, 1397, 1115, 717, 640, 536  $\text{cm}^{-1}$ .

(2-(9-Benzyl-9H-purin-6-yl)phenyl)diphenylphosphine oxide (**3c**)

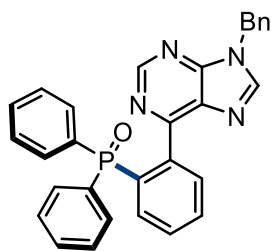

Prepared according to standard procedure A using [Ru(OAc)<sub>2</sub>(*p*-cymene)] (10 mol %) on a 0.3 mmol scale, purification by column chromatography on silica gel (DCM/MeOH = 20/1, R<sub>f</sub> = 0.3) yielded **3c** (103.1 mg, 71%) as a colorless solid. M.p.: 218-219 °C

<sup>1</sup>H NMR (300 MHz, CDCl<sub>3</sub>) δ 8.52 (s, 1H), 7.90 (s, 1H), 7.88 (dd, *J* = 7.7, 4.2 Hz, 1H), 7.79 – 7.71 (m, 1H), 7.61 – 7.50 (m, 5H), 7.47 – 7.40 (m, 1H), 7.28 – 7.20 (m, 5H), 7.13 – 7.08 (m, 6H), 5.23 (s, 2H).

<sup>13</sup>C NMR (75 MHz, CDCl<sub>3</sub>) δ 156.3 (d, *J* = 3.2 Hz) (C<sub>q</sub>), 151.3 (C<sub>q</sub>), 151.3 (CH), 144.2 (CH), 139.5 (d, *J* = 6.9 Hz) (C<sub>q</sub>), 135.3 (d, *J* = 10.5 Hz) (CH), 135.0 (C<sub>q</sub>), 133.5 (d, *J* = 106.8 Hz) (C<sub>q</sub>), 131.9 (d, *J* = 139.6 Hz) (C<sub>q</sub>), 131.7 (CH), 131.6 (CH), 131.5 (CH), 131.4 (CH), 130.7 (d, *J* = 2.8 Hz) (CH), 129.0 (CH), 128.9 (CH), 128.4 (CH), 127.9 (CH), 127.6 (d, *J* = 12.3 Hz) (CH), 47.0 (CH<sub>2</sub>).

<sup>31</sup>P NMR (121 MHz, CDCl<sub>3</sub>) δ 29.40.

HRMS (ESI) *m/z*: [M+H]<sup>+</sup> Calcd for C<sub>30</sub>H<sub>24</sub>N<sub>4</sub>OP 487.1682; Found 487.1678.

IR (ATR): 3060, 1716, 1580, 1437, 1108, 906, 691, 647, 532 cm<sup>-1</sup>.

(2R,3R,4R,5R)-2-(Acetoxymethyl)-5-(6-(2-(diphenylphosphoryl)phenyl)-9H-purin-9-yl)tetrahydrofuran-3,4-diyl diacetate (**3d**)

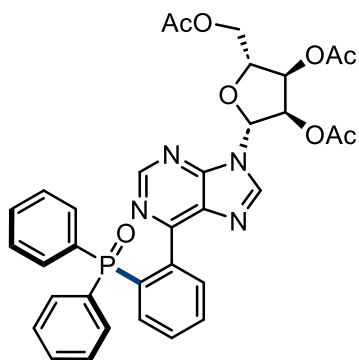

Prepared according to standard procedure A using [Ru(OAc)<sub>2</sub>(*p*-cymene)] (10 mol %) on a 0.3 mmol scale, purification by column chromatography on silica gel (DCM/MeOH = 20/1, R<sub>f</sub> = 0.25) yielded **3d** (119.7 mg, 61%) as a colorless sticky oil.

<sup>1</sup>H NMR (400 MHz, CDCl<sub>3</sub>) δ 8.60 (s, 1H), 8.14 (s, 1H), 7.92 – 7.83 (m, 2H), 7.73 – 7.66 (m, 2H), 7.64 – 7.56 (m, 4H), 7.36 – 7.31 (m, 2H), 7.29 – 7.22 (m, 4H), 6.17 (d, *J* = 4.7 Hz, 1H), 5.93 – 5.85 (m, 1H), 5.69 (t, *J* = 5.3 Hz, 1H), 4.51 – 4.35 (m, 3H), 2.16 – 2.11 (m, 9H).

<sup>13</sup>C NMR (75 MHz, CDCl<sub>3</sub>) δ 170.2 (C<sub>q</sub>), 169.4 (C<sub>q</sub>), 169.3 (C<sub>q</sub>), 157.2 (d, *J* = 3.2 Hz) (C<sub>q</sub>), 151.5 (CH), 150.8 (C<sub>q</sub>), 142.7 (CH), 139.2 (d, *J* = 6.9 Hz) (C<sub>q</sub>), 135.3 (d, *J* = 10.3 Hz) (CH), 134.3 (C<sub>q</sub>), 134.2 (C<sub>q</sub>), 133.1 (C<sub>q</sub>), 132.9 (C<sub>q</sub>), 132.8 (C<sub>q</sub>), 131.9 (C<sub>q</sub>), 131.8 (C<sub>q</sub>), 131.6 (CH), 131.6 (CH), 131.5 (CH), 131.5 (CH), 131.0 (CH), 130.9 (CH), 130.9 (CH), 129.1 (d, *J* = 11.9 Hz) (CH), 127.7 (d, *J* = 12.3 Hz) (CH), 86.5 (CH), 80.0 (CH), 73.1 (CH), 70.3 (CH), 62.9 (CH<sub>2</sub>), 20.6 (CH<sub>3</sub>), 20.4 (CH<sub>3</sub>), 20.3 (CH<sub>3</sub>).



$^{31}\text{P}$  NMR (121 MHz,  $\text{CDCl}_3$ )  $\delta$  29.06.

HRMS (ESI)  $m/z$ :  $[\text{M}+\text{H}]^+$  Calcd for  $\text{C}_{34}\text{H}_{32}\text{N}_4\text{O}_8\text{P}$  655.1952; Found 655.1948.

IR (ATR): 1745, 1582, 1212, 901, 720, 541  $\text{cm}^{-1}$ .

(4-Fluoro-2-(9-isopropyl-9H-purin-6-yl)phenyl)diphenylphosphine oxide (**3e**)

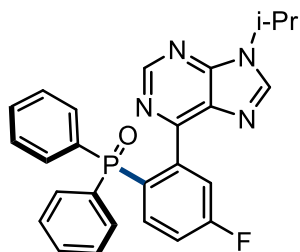

Prepared according to standard procedure A using  $[\text{Ru}(\text{OAc})_2(p\text{-cymene})]$  (10 mol %) on a 0.3 mmol scale, purification by column chromatography on silica gel ( $\text{DCM}/\text{MeOH} = 20/1$ ,  $R_f = 0.22$ ) yielded **3e** (112.2 mg, 82%) as a colorless sticky oil.

$^1\text{H}$  NMR (300 MHz,  $\text{CDCl}_3$ )  $\delta$  8.78 (s, 1H), 8.07 (s, 1H), 7.70 – 7.58 (m, 5H), 7.51 – 7.43 (m, 1H), 7.38 – 7.24 (m, 6H), 7.21 – 7.12 (m, 1H), 4.90 – 4.78 (m, 1H), 1.61 (d,  $J = 6.8$  Hz, 6H).

$^{13}\text{C}$  NMR (75 MHz,  $\text{CDCl}_3$ )  $\delta$  172.8 ( $\text{C}_q$ ), 163.9 (d,  $J_{\text{C-F}} = 251.6$  Hz) ( $\text{C}_q$ ), 156.5 (t,  $J = 3.1$  Hz) ( $\text{C}_q$ ), 151.0 (CH), 150.7 ( $\text{C}_q$ ), 142.4 ( $\text{C}_q$ ), 142.2 (CH), 133.9 (CH), 133.7 (d,  $J = 1.8$  Hz) (CH), 132.2 (d,  $J = 27.9$  Hz) ( $\text{C}_q$ ), 131.1 (d,  $J = 3.3$  Hz) (CH), 131.0 (d,  $J = 1.8$  Hz) (CH), 127.7 (d,  $J = 12.8$  Hz) (CH), 119.9 (dd,  $J = 97.2, 17.6$  Hz) ( $\text{C}_q$ ), 117.0 (dd,  $J = 24.6, 5.1$  Hz) (CH), 47.2 (CH), 22.3 ( $\text{CH}_3$ ).

$^{31}\text{P}$  NMR (121 MHz,  $\text{CDCl}_3$ )  $\delta$  23.85.

$^{19}\text{F}$  NMR (282 MHz,  $\text{CDCl}_3$ )  $\delta$  -94.79.

HRMS (ESI)  $m/z$ :  $[\text{M}+\text{H}]^+$  Calcd for  $\text{C}_{26}\text{H}_{23}\text{FN}_4\text{OP}$  457.1588; Found 457.1590.

IR (ATR): 2978, 2227, 1561, 1438, 1195, 1117, 906, 716  $\text{cm}^{-1}$ .

(2-(9-Isopropyl-9H-purin-6-yl)-4-methylphenyl)diphenylphosphine oxide (**3f**)

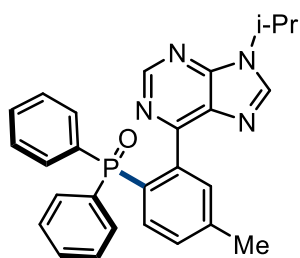

Prepared according to standard procedure A using  $[\text{Ru}(\text{OAc})_2(p\text{-cymene})]$  (10 mol %) on a 0.3 mmol scale, purification by column chromatography on silica gel ( $\text{DCM}/\text{MeOH} = 20/1$ ,  $R_f = 0.3$ ) yielded **3f** (85.5 mg, 63%) as a colorless sticky oil.

$^1\text{H}$  NMR (300 MHz,  $\text{CDCl}_3$ )  $\delta$  8.58 (s, 1H), 8.02 (s, 1H), 7.79 – 7.57 (m, 6H), 7.36 (d,  $J = 7.9$  Hz, 1H), 7.30 – 7.18 (m, 6H), 4.90 – 4.74 (m, 1H), 2.46 (s, 3H), 1.59 (d,  $J = 6.8$  Hz, 6H).

$^{13}\text{C}$  NMR (75 MHz,  $\text{CDCl}_3$ )  $\delta$  156.8 (d,  $J = 3.3$  Hz) ( $\text{C}_q$ ), 150.9 (CH), 150.9 ( $\text{C}_q$ ), 142.1 (d,  $J = 2.6$  Hz) ( $\text{C}_q$ ), 141.9 (CH), 139.6 (d,  $J = 7.3$  Hz) ( $\text{C}_q$ ), 135.3 (d,  $J = 10.6$  Hz) (CH), 133.8 (d,  $J = 106.4$  Hz) ( $\text{C}_q$ ), 132.1 (d,  $J = 9.9$  Hz) (CH), 131.6 (d,  $J = 9.5$  Hz) (CH), 131.6 ( $\text{C}_q$ ), 130.6 (d,  $J = 2.6$  Hz) (CH), 129.7 (d,

$J = 12.1$  Hz) (CH), 129.0 (d,  $J = 103.4$  Hz) ( $C_q$ ), 127.5 (d,  $J = 12.1$  Hz) (CH), 47.1 (CH), 22.4 ( $CH_3$ ), 21.4 ( $CH_3$ ).

$^{31}P$  NMR (121 MHz,  $CDCl_3$ )  $\delta$  28.76.

HRMS (ESI)  $m/z$ :  $[M+H]^+$  Calcd for  $C_{27}H_{26}N_4OP$  453.1839; Found 453.1847.

IR (ATR): 3055, 2977, 2225, 1574, 1436, 1192, 907, 704  $cm^{-1}$ .

(2,5-Bis(3-methoxypyridin-2-yl)phenyl)diphenylphosphine oxide (**3g**)

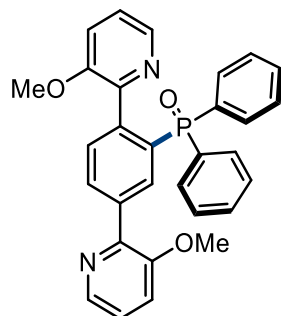

Prepared according to standard procedure A using  $[Ru(OAc)_2(p\text{-cymene})]$  (10 mol %) on a 0.3 mmol scale, purification by column chromatography on silica gel ( $DCM/MeOH = 20/1$ ,  $R_f = 0.10$ ) yielded **3g** (91.8 mg, 62%) as a colorless sticky oil.

$^1H$  NMR (300 MHz,  $CDCl_3$ )  $\delta$  8.26 – 8.09 (m, 3H), 7.95 (dd,  $J = 4.7, 1.1$  Hz, 1H), 7.60 – 7.52 (m, 4H), 7.47 (dd,  $J = 8.0, 4.2$  Hz, 1H), 7.35 – 7.28 (m, 2H), 7.27 – 7.20 (m, 4H), 7.13 – 7.07 (m, 2H), 6.99 – 6.93 (m, 1H), 6.75 (dd,  $J = 8.4, 1.1$  Hz, 1H), 3.53 (s, 3H), 3.27 (s, 3H).

$^{13}C$  NMR (75 MHz,  $CDCl_3$ )  $\delta$  153.6 ( $C_q$ ), 153.2 ( $C_q$ ), 148.6 (d,  $J = 3.5$  Hz) ( $C_q$ ), 146.2 ( $C_q$ ), 142.2 (d,  $J = 8.0$  Hz) ( $C_q$ ), 141.3 (CH), 139.9 (CH), 136.7 (d,  $J = 12.7$  Hz) ( $C_q$ ), 135.0 (d,  $J = 12.7$  Hz) (CH), 134.1 (d,  $J = 104.6$  Hz) ( $C_q$ ), 132.2 (d,  $J = 2.6$  Hz) (CH), 131.9 (d,  $J = 9.8$  Hz) (CH), 131.3 (d,  $J = 10.5$  Hz) (CH), 130.8 (d,  $J = 2.8$  Hz) (CH), 130.2 (d,  $J = 101.9$  Hz) ( $C_q$ ), 127.8 (d,  $J = 12.1$  Hz) (CH), 123.4 (CH), 123.2 (CH), 118.5 (CH), 116.4 (CH), 55.1 ( $CH_3$ ), 54.2 ( $CH_3$ ).

$^{31}P$  NMR (121 MHz,  $CDCl_3$ )  $\delta$  29.23.

HRMS (ESI)  $m/z$ :  $[M+H]^+$  Calcd for  $C_{30}H_{26}N_2O_3P$  493.1676; Found 493.1689.

IR (ATR): 3055, 2834, 1580, 1425, 1179, 1015, 705, 540  $cm^{-1}$ .

(2-(4,4-Dimethyl-4,5-dihydrooxazol-2-yl)phenyl)diphenylphosphine oxide (**3h**)

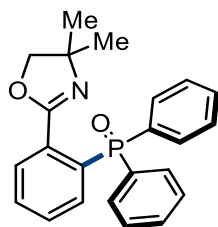

Prepared according to standard procedure A using  $[Ru(OAc)_2(p\text{-cymene})]$  (10 mol %) on a 0.3 mmol scale, purification by column chromatography on silica gel ( $DCM/MeOH = 20/1$ ,  $R_f = 0.23$ ) yielded **3h** (39.4 mg, 35%) as a colorless sticky oil.

$^1H$  NMR (300 MHz,  $CDCl_3$ )  $\delta$  7.93 (dd,  $J = 7.5, 4.0$  Hz, 1H), 7.72 – 7.64 (m, 4H), 7.58 – 7.51 (m, 1H), 7.49 – 7.40 (m, 8H), 3.55 (s, 2H), 1.09 (s, 6H).

$^{13}\text{C}$  NMR (75 MHz,  $\text{CDCl}_3$ )  $\delta$  162.4 (d,  $J = 3.2$  Hz) ( $\text{C}_q$ ), 134.8 (d,  $J = 10.9$  Hz) (CH), 133.5 (d,  $J = 106.8$  Hz) ( $\text{C}_q$ ), 132.7 (d,  $J = 6.2$  Hz) ( $\text{C}_q$ ), 131.8 (d,  $J = 2.4$  Hz) (CH), 131.7 (d,  $J = 99.2$  Hz) ( $\text{C}_q$ ), 131.5 (d,  $J = 9.7$  Hz) (CH), 131.3 (d,  $J = 2.9$  Hz) (CH), 131.2 (CH), 130.1 (d,  $J = 12.0$  Hz) (CH), 128.3 (d,  $J = 12.3$  Hz) (CH), 79.1 ( $\text{CH}_2$ ), 67.3 ( $\text{C}_q$ ), 27.8 ( $\text{CH}_3$ ).

$^{31}\text{P}$  NMR (121 MHz,  $\text{CDCl}_3$ )  $\delta$  29.50.

HRMS (ESI)  $m/z$ :  $[\text{M}+\text{H}]^+$  Calcd for  $\text{C}_{23}\text{H}_{23}\text{NO}_2\text{P}$  376.1461; Found 376.1472.

IR (ATR): 2964, 1659, 1437, 1177, 963, 693, 543  $\text{cm}^{-1}$ .

(E)-2-(1-(Methoxyimino)ethyl)phenyl)diphenylphosphine oxide (**3i**)

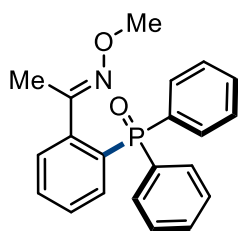

Prepared according to standard procedure A using  $[\text{Ru}(\text{OAc})_2(p\text{-cymene})]$  (10 mol %) on a 0.3 mmol scale, purification by column chromatography on silica gel ( $\text{DCM}/\text{MeOH} = 20/1$ ,  $R_f = 0.33$ ) yielded **3i** (52.1 mg, 50%) as a colorless sticky oil.

$^1\text{H}$  NMR (300 MHz,  $\text{CDCl}_3$ )  $\delta$  7.64 – 7.57 (m, 4H), 7.48 – 7.34 (m, 8H), 7.32 – 7.24 (m, 2H), 3.40 (s, 3H), 1.85 (s, 3H).

$^{13}\text{C}$  NMR (75 MHz,  $\text{CDCl}_3$ )  $\delta$  156.5 (d,  $J = 3.5$  Hz) ( $\text{C}_q$ ), 142.5 (d,  $J = 7.4$  Hz) ( $\text{C}_q$ ), 134.3 (CH), 133.5 (d,  $J = 95.1$  Hz) ( $\text{C}_q$ ), 132.1 (d,  $J = 9.8$  Hz) (CH), 131.9 (d,  $J = 2.7$  Hz) (CH), 131.5 (d,  $J = 102.5$  Hz) ( $\text{C}_q$ ), 131.4 (d,  $J = 2.7$  Hz) (CH), 129.5 (d,  $J = 9.5$  Hz) (CH), 128.2 (d,  $J = 12.3$  Hz) (CH), 127.8 (d,  $J = 12.3$  Hz) (CH), 61.2 ( $\text{CH}_3$ ), 16.6 ( $\text{CH}_3$ ).

$^{31}\text{P}$  NMR (121 MHz,  $\text{CDCl}_3$ )  $\delta$  30.23.

HRMS (ESI)  $m/z$ :  $[\text{M}+\text{H}]^+$  Calcd for  $\text{C}_{21}\text{H}_{21}\text{NO}_2\text{P}$  350.1304; Found 350.1314.

IR (ATR): 1436, 1312, 1181, 1037, 875, 692, 529  $\text{cm}^{-1}$ .

Diphenyl(2-(pyrazin-2-yl)phenyl)phosphine oxide (**3j**)

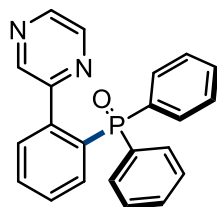

Prepared according to standard procedure A using  $[\text{Ru}(\text{OAc})_2(p\text{-cymene})]$  (10 mol %) on a 0.3 mmol scale, purification by column chromatography on silica gel ( $\text{DCM}/\text{MeOH} = 20/1$ ,  $R_f = 0.38$ ) yielded **3j** (29 mg, 27%) as a colorless solid. M.p.: 160-161  $^\circ\text{C}$

$^1\text{H}$  NMR (300 MHz,  $\text{CDCl}_3$ )  $\delta$  8.88 – 8.82 (m, 1H), 8.28 (d,  $J = 2.4$  Hz, 1H), 8.23 – 8.19 (m, 1H), 7.68 – 7.56 (m, 6H), 7.50 – 7.34 (m, 8H).

$^{13}\text{C}$  NMR (75 MHz,  $\text{CDCl}_3$ )  $\delta$  153.8 (d,  $J = 4.0$  Hz) ( $\text{C}_q$ ), 145.8 (CH), 143.1 (CH), 142.9 (CH), 142.3 (d,  $J = 7.5$  Hz) ( $\text{C}_q$ ), 134.3 (d,  $J = 11.5$  Hz) (CH), 132.9 (d,  $J = 105.2$  Hz) ( $\text{C}_q$ ), 132.1 (d,  $J = 100.2$  Hz) ( $\text{C}_q$ ),

132.0 (d,  $J = 2.5$  Hz) (CH), 131.7 (d,  $J = 9.6$  Hz) (CH), 131.5 (d,  $J = 2.8$  Hz) (CH), 128.5 (CH), 128.4 (CH), 128.3 (d,  $J = 12.2$  Hz) (CH).

$^{31}\text{P}$  NMR (121 MHz,  $\text{CDCl}_3$ )  $\delta$  28.76.

HRMS (ESI)  $m/z$ :  $[\text{M}+\text{H}]^+$  Calcd for  $\text{C}_{22}\text{H}_{18}\text{N}_2\text{OP}$  357.1151; Found 357.1146.

IR (ATR): 3053, 1437, 1196, 1104, 1019, 715, 540  $\text{cm}^{-1}$ .

#### Diphenyl(2-(3-phenylpyrazin-2-yl)phenyl)phosphine oxide (**3k**)

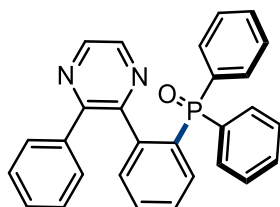

Prepared according to standard procedure A using  $[\text{Ru}(\text{OAc})_2(p\text{-cymene})]$  (10 mol %) on a 0.3 mmol scale, purification by column chromatography on silica gel ( $\text{DCM}/\text{MeOH} = 20/1$ ,  $R_f = 0.22$ ) yielded **3k** (44.1 mg, 34%) as a colorless sticky oil.

$^1\text{H}$  NMR (400 MHz,  $\text{CDCl}_3$ )  $\delta$  8.51 (d,  $J = 2.4$  Hz, 1H), 8.20 (d,  $J = 2.4$  Hz, 1H), 7.53 – 7.41 (m, 10H), 7.40 – 7.33 (m, 5H), 7.25 – 7.16 (m, 4H).

$^{13}\text{C}$  NMR (101 MHz,  $\text{CDCl}_3$ )  $\delta$  153.0 (d,  $J = 3.4$  Hz) ( $\text{C}_q$ ), 152.7 ( $\text{C}_q$ ), 144.1 (d,  $J = 6.6$  Hz) ( $\text{C}_q$ ), 142.6 (CH), 140.8 (CH), 138.1 ( $\text{C}_q$ ), 134.2 (d,  $J = 11.4$  Hz) (CH), 133.6 (d,  $J = 105.1$  Hz) ( $\text{C}_q$ ), 131.8 (d,  $J = 9.8$  Hz) (CH), 131.7 (CH), 131.4 (d,  $J = 2.7$  Hz) (CH), 131.2 (d,  $J = 2.5$  Hz) (CH), 130.4 (d,  $J = 92.9$  Hz) ( $\text{C}_q$ ), 129.9 (CH), 128.3 (CH), 128.2 (d,  $J = 12.2$  Hz) (CH), 127.8 (CH), 127.6 (d,  $J = 12.2$  Hz) (CH).

$^{31}\text{P}$  NMR (162 MHz,  $\text{CDCl}_3$ )  $\delta$  29.83.

HRMS (ESI)  $m/z$ :  $[\text{M}+\text{H}]^+$  Calcd for  $\text{C}_{28}\text{H}_{22}\text{N}_2\text{OP}$  433.1464; Found 433.1460.

IR (ATR): 3055, 1389, 1118, 1018, 856, 694, 542  $\text{cm}^{-1}$ .

#### Diphenyl(2-(pyridin-2-yl)phenyl)phosphine oxide (**3l**)

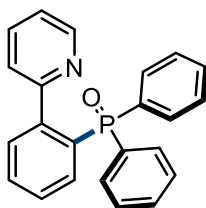

Prepared according to standard procedure A using  $[\text{Ru}(\text{OAc})_2(p\text{-cymene})]$  (10 mol %) on a 0.3 mmol scale, purification by column chromatography on silica gel ( $\text{DCM}/\text{MeOH} = 20/1$ ,  $R_f = 0.40$ ) yielded **3l** (54.2 mg, 51%) as a colorless solid. M.p.: 176-177  $^\circ\text{C}$

$^1\text{H}$  NMR (300 MHz,  $\text{CDCl}_3$ )  $\delta$  8.18 – 8.15 (m, 1H), 7.73 (d,  $J = 7.9$  Hz, 1H), 7.56 – 7.49 (m, 6H), 7.41 – 7.35 (m, 2H), 7.33 – 7.27 (m, 3H), 7.26 – 7.19 (m, 4H), 6.88 – 6.83 (m, 1H).

$^{13}\text{C}$  NMR (75 MHz,  $\text{CDCl}_3$ )  $\delta$  157.5 (d,  $J = 4.1$  Hz) ( $\text{C}_q$ ), 148.6 (CH), 145.7 (d,  $J = 7.9$  Hz) ( $\text{C}_q$ ), 135.3 (CH), 134.3 (d,  $J = 11.8$  Hz) (CH), 133.1 (d,  $J = 105.2$  Hz) ( $\text{C}_q$ ), 131.9 (d,  $J = 2.6$  Hz) (CH), 131.5 (d,  $J = 9.5$  Hz) (CH), 131.3 (CH), 131.1 (d,  $J = 2.8$  Hz) (CH), 131.1 (d,  $J = 101.3$  Hz) ( $\text{C}_q$ ), 128.0 (d,  $J = 12.2$  Hz) (CH), 127.6 (d,  $J = 12.3$  Hz) (CH), 125.6 (CH), 121.9 (CH).

$^{31}\text{P}$  NMR (121 MHz,  $\text{CDCl}_3$ )  $\delta$  29.12.

HRMS (ESI)  $m/z$ :  $[\text{M}+\text{H}]^+$  Calcd for  $\text{C}_{23}\text{H}_{19}\text{NOP}$  356.1199; Found 356.1204.

IR (ATR): 3057, 2142, 1584, 1437, 1181, 1104, 694, 540  $\text{cm}^{-1}$ .

Diphenyl(2-(pyridin-2-yl)thiophen-3-yl)phosphine oxide (**3m**)

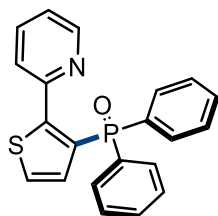

Prepared according to standard procedure A using  $[\text{Ru}(\text{OAc})_2(p\text{-cymene})]$  (10 mol %) on a 0.3 mmol scale, purification by column chromatography on silica gel ( $\text{DCM}/\text{MeOH} = 20/1$ ,  $R_f = 0.25$ ) yielded **3m** (96.4 mg, 89%) as a colorless sticky oil.

$^1\text{H}$  NMR (300 MHz,  $\text{CDCl}_3$ )  $\delta$  8.41 – 8.36 (m, 1H), 8.26 – 8.21 (m, 1H), 7.71 – 7.63 (m, 4H), 7.43 – 7.30 (m, 8H), 7.01 – 6.94 (m, 1H), 6.72 (td,  $J = 5.2, 1.1$  Hz, 1H).

$^{13}\text{C}$  NMR (75 MHz,  $\text{CDCl}_3$ )  $\delta$  154.0 (d,  $J = 11.0$  Hz) ( $\text{C}_q$ ), 150.9 (d,  $J = 2.1$  Hz) ( $\text{C}_q$ ), 148.8 (CH), 136.2 (CH), 134.0 (d,  $J = 16.6$  Hz) (CH), 133.0 (d,  $J = 107.4$  Hz) ( $\text{C}_q$ ), 131.6 (d,  $J = 2.9$  Hz) (CH), 131.5 (d,  $J = 9.9$  Hz) (CH), 129.4 (d,  $J = 103.0$  Hz) ( $\text{C}_q$ ), 128.3 (d,  $J = 12.4$  Hz) (CH), 126.5 (d,  $J = 16.4$  Hz) (CH), 124.2 (CH), 122.6 (CH).

$^{31}\text{P}$  NMR (121 MHz,  $\text{CDCl}_3$ )  $\delta$  22.02.

HRMS (ESI)  $m/z$ :  $[\text{M}+\text{H}]^+$  Calcd for  $\text{C}_{21}\text{H}_{17}\text{NOPS}$  362.0763; Found 362.0770.

IR (ATR): 3050, 1582, 1436, 1162, 996, 696, 537  $\text{cm}^{-1}$ .

(2-(1-methyl-1H-benzo[d]imidazol-2-yl)phenyl)diphenylphosphine oxide (**3n**)

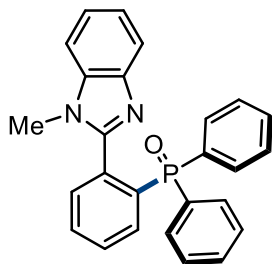

Prepared according to standard procedure A using  $[\text{Ru}(\text{OAc})_2(p\text{-cymene})]$  (10 mol %) on a 0.3 mmol scale, purification by column chromatography on silica gel ( $\text{DCM}/\text{MeOH} = 20/1$ ,  $R_f = 0.34$ ) yielded **3n** (50.3 mg, 41%) as a colorless sticky oil.

$^1\text{H}$  NMR (300 MHz,  $\text{CDCl}_3$ )  $\delta$  7.99 – 7.89 (m, 1H), 7.64 – 7.56 (m, 2H), 7.54 – 7.46 (m, 4H), 7.43 – 7.38 (m, 2H), 7.23 – 7.07 (m, 8H), 7.01 – 6.96 (m, 1H), 3.25 (s, 3H).

$^{13}\text{C}$  NMR (75 MHz,  $\text{CDCl}_3$ )  $\delta$  151.2 (d,  $J = 4.1$  Hz) ( $\text{C}_q$ ), 141.9 ( $\text{C}_q$ ), 134.8 ( $\text{C}_q$ ), 134.3 (d,  $J = 9.5$  Hz) (CH), 134.0 (d,  $J = 100.0$  Hz) ( $\text{C}_q$ ), 133.5 (d,  $J = 8.2$  Hz) ( $\text{C}_q$ ), 131.8 (CH), 131.7 (d,  $J = 10.1$  Hz) (CH), 131.5 (CH), 131.4 (d,  $J = 106.0$  Hz) ( $\text{C}_q$ ), 131.3 (d,  $J = 3.0$  Hz) (CH), 129.9 (d,  $J = 11.2$  Hz) (CH), 127.8 (d,  $J = 12.5$  Hz) (CH), 122.7 (CH), 122.1 (CH), 119.6 (CH), 109.4 (CH), 30.9 ( $\text{CH}_3$ ).

$^{31}\text{P}$  NMR (121 MHz,  $\text{CDCl}_3$ )  $\delta$  28.70.

HRMS (ESI)  $m/z$ :  $[M+H]^+$  Calcd for  $C_{26}H_{22}N_2OP$  409.1464; Found 409.1460.

IR (ATR): 3057, 1716, 1422, 1118, 906, 689, 535, 449  $cm^{-1}$ .

(2-(9-Isopropyl-9H-purin-6-yl)phenyl)di(naphthalen-2-yl)phosphine oxide (**3o**)

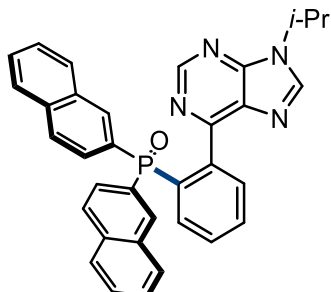

Prepared according to standard procedure A using  $[Ru(OAc)_2(p\text{-cymene})]$  (10 mol %) on a 0.3 mmol scale, purification by column chromatography on silica gel (DCM/MeOH = 20/1,  $R_f$  = 0.18) yielded **3o** (116.0 mg, 72%) as a colorless sticky oil.

$^1H$  NMR (300 MHz,  $CDCl_3$ )  $\delta$  8.53 (s, 1H), 8.28 (d,  $J$  = 13.9 Hz, 2H), 7.97 – 7.89 (m, 2H), 7.84 (s, 1H), 7.76 – 7.63 (m, 9H), 7.57 – 7.51 (m, 1H), 7.49 – 7.38 (m, 4H), 4.44 (h,  $J$  = 6.7 Hz, 1H), 1.32 (d,  $J$  = 6.8 Hz, 6H).

$^{13}C$  NMR (75 MHz,  $CDCl_3$ )  $\delta$  156.3 (d,  $J$  = 3.2 Hz) ( $C_q$ ), 150.9 (CH), 150.7 ( $C_q$ ), 141.9 (CH), 139.8 (d,  $J$  = 7.2 Hz) ( $C_q$ ), 135.5 (d,  $J$  = 10.6 Hz) (CH), 134.0 (d,  $J$  = 2.3 Hz) ( $C_q$ ), 133.2 (d,  $J$  = 9.2 Hz) (CH), 132.3 (d,  $J$  = 101.4 Hz) ( $C_q$ ), 132.0 ( $C_q$ ), 131.9 ( $C_q$ ), 131.7 (CH), 131.5 (CH), 130.9 (d,  $J$  = 106.6 Hz) ( $C_q$ ), 129.0 (d,  $J$  = 12.0 Hz) (CH), 128.7 (CH), 127.5 (d,  $J$  = 17.2 Hz) (CH), 127.3 (d,  $J$  = 12.1 Hz) (CH), 126.7 (d,  $J$  = 10.5 Hz) (CH), 126.3 (CH), 47.0 (CH), 22.0 ( $CH_3$ ).

$^{31}P$  NMR (121 MHz,  $CDCl_3$ )  $\delta$  28.59.

HRMS (ESI)  $m/z$ :  $[M+H]^+$  Calcd for  $C_{34}H_{28}N_4OP$  539.1995; Found 539.1989.

IR (ATR): 3054, 1576, 1391, 1188, 1085, 931, 814, 645, 477  $cm^{-1}$ .

(2-(9-Isopropyl-9H-purin-6-yl)phenyl)di-*p*-tolylphosphine oxide (**3p**)

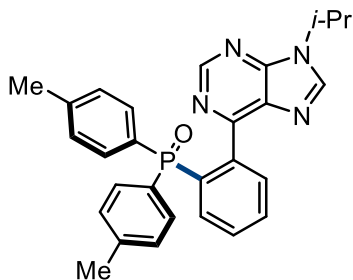

Prepared according to standard procedure A using  $[Ru(OAc)_2(p\text{-cymene})]$  (10 mol %) on a 0.3 mmol scale, purification by column chromatography on silica gel (DCM/MeOH = 20/1,  $R_f$  = 0.15) yielded **3p** (102.1 mg, 73%) as a colorless sticky oil.

$^1H$  NMR (400 MHz,  $CDCl_3$ )  $\delta$  8.56 (s, 1H), 8.03 (s, 1H), 7.88 (dd,  $J$  = 7.3, 3.9 Hz, 1H), 7.77 (dd,  $J$  = 13.5, 7.7 Hz, 1H), 7.64 (t,  $J$  = 7.5 Hz, 1H), 7.51 – 7.45 (m, 5H), 7.06 – 7.01 (m, 4H), 4.85 – 4.75 (m, 1H), 2.26 (s, 6H), 1.58 (d,  $J$  = 6.8 Hz, 6H).

$^{13}C$  NMR (101 MHz,  $CDCl_3$ )  $\delta$  156.7 (d,  $J$  = 3.2 Hz) ( $C_q$ ), 151.0 (CH), 151.0 ( $C_q$ ), 141.9 (CH), 141.0 (d,

$J = 2.8$  Hz) ( $C_q$ ), 139.7 (d,  $J = 6.9$  Hz) ( $C_q$ ), 135.2 (d,  $J = 10.6$  Hz) (CH), 132.7 (d,  $J = 101.0$  Hz) ( $C_q$ ), 131.7 ( $C_q$ ), 131.6 (d,  $J = 4.8$  Hz) (CH), 131.5 (d,  $J = 3.7$  Hz) (CH), 131.3 (d,  $J = 2.5$  Hz) (CH), 130.6 (d,  $J = 108.9$  Hz) ( $C_q$ ), 128.8 (d,  $J = 12.0$  Hz) (CH), 128.4 (d,  $J = 12.7$  Hz) (CH), 47.1 (CH), 22.3 ( $CH_3$ ), 21.4 ( $CH_3$ ), 21.4 ( $CH_3$ ).

$^{31}P$  NMR (162 MHz,  $CDCl_3$ )  $\delta$  29.37.

HRMS (ESI)  $m/z$ :  $[M+H]^+$  Calcd for  $C_{28}H_{28}N_4OP$  467.1995; Found 467.2006.

IR (ATR): 2978, 1580, 1331, 1100, 931, 733, 536  $cm^{-1}$ .

### Bis(4-chlorophenyl)(2-(9-isopropyl-9H-purin-6-yl)phenyl)phosphine oxide (**3q**)

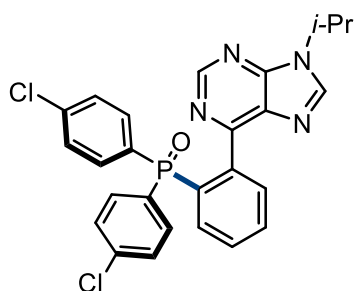

Prepared according to standard procedure A using  $[Ru(OAc)_2(p\text{-cymene})]$  (10 mol %) on a 0.3 mmol scale, purification by column chromatography on silica gel (DCM/MeOH = 20/1,  $R_f = 0.38$ ) yielded **3q** (77.4 mg, 51%) as a colorless solid. M.p.: 198-199 °C

$^1H$  NMR (300 MHz,  $CDCl_3$ )  $\delta$  8.50 (s, 1H), 7.99 (s, 1H), 7.91 – 7.78 (m, 2H), 7.68 – 7.62 (m, 1H), 7.55 – 7.44 (m, 5H), 7.17 – 7.11 (m, 4H), 4.86 – 4.69 (m, 1H), 1.56 (d,  $J = 6.8$  Hz, 6H).

$^{13}C$  NMR (75 MHz,  $CDCl_3$ )  $\delta$  156.1 (d,  $J = 3.3$  Hz) ( $C_q$ ), 151.1 ( $C_q$ ), 150.8 (CH), 142.2 (CH), 139.5 (d,  $J = 7.4$  Hz) ( $C_q$ ), 137.5 (d,  $J = 3.4$  Hz) ( $C_q$ ), 135.3 (d,  $J = 10.3$  Hz) (CH), 133.0 (d,  $J = 10.8$  Hz) (CH), 132.0 (d,  $J = 2.6$  Hz) (CH), 132.0 (d,  $J = 108.3$  Hz) ( $C_q$ ), 131.8 (d,  $J = 9.4$  Hz) (CH), 131.5 ( $C_q$ ), 131.4 (d,  $J = 103.2$  Hz) ( $C_q$ ), 129.2 (d,  $J = 12.2$  Hz) (CH), 128.0 (d,  $J = 13.0$  Hz) (CH), 47.4 (CH), 22.3 ( $CH_3$ ).

$^{31}P$  NMR (121 MHz,  $CDCl_3$ )  $\delta$  27.88.

HRMS (ESI)  $m/z$ :  $[M+H]^+$  Calcd for  $C_{26}H_{22}Cl_2N_4OP$  507.0903; Found 507.0920.

IR (ATR): 2978, 1582, 1390, 1193, 1086, 1013, 751, 559  $cm^{-1}$ .

### (2-(9-Isopropyl-9H-purin-6-yl)phenyl)bis(4-methoxyphenyl)phosphine oxide (**3r**)

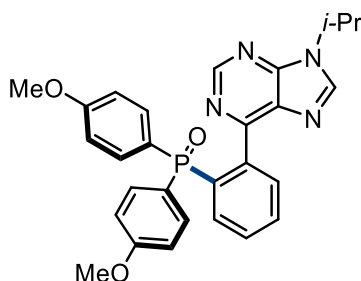

Prepared according to standard procedure A using  $[Ru(OAc)_2(p\text{-cymene})]$  (10 mol %) on a 0.3 mmol scale, purification by column chromatography on silica gel (DCM/MeOH = 20/1,  $R_f = 0.13$ ) yielded **3r** (129.9 mg, 87%) as a colorless sticky oil.

$^1H$  NMR (300 MHz,  $CDCl_3$ )  $\delta$  8.56 (s, 1H), 7.97 (s, 1H), 7.83 (dd,  $J = 13.3, 7.6$  Hz, 1H), 7.72 – 7.67 (m,

1H), 7.58 (t,  $J = 7.5$  Hz, 1H), 7.49 – 7.40 (m, 5H), 6.65 (dd,  $J = 8.7, 2.0$  Hz, 4H), 4.78 – 4.69 (m, 1H), 3.66 (s, 6H), 1.52 (d,  $J = 6.8$  Hz, 6H).

$^{13}\text{C}$  NMR (75 MHz,  $\text{CDCl}_3$ )  $\delta$  172.9 ( $\text{C}_q$ ), 161.3 (d,  $J = 2.9$  Hz) ( $\text{C}_q$ ), 156.8 (d,  $J = 3.4$  Hz) ( $\text{C}_q$ ), 150.8 (CH), 150.7 ( $\text{C}_q$ ), 141.9 (CH), 139.3 (d,  $J = 7.5$  Hz) ( $\text{C}_q$ ), 134.9 (d,  $J = 10.1$  Hz) (CH), 133.3 (d,  $J = 11.3$  Hz) (CH), 131.8 (d,  $J = 45.0$  Hz) ( $\text{C}_q$ ), 131.2 (d,  $J = 2.1$  Hz) (CH), 131.0 (CH), 128.7 (d,  $J = 11.8$  Hz) (CH), 124.5 (d,  $J = 113.1$  Hz) ( $\text{C}_q$ ), 113.0 (d,  $J = 13.4$  Hz) (CH), 54.9 ( $\text{CH}_3$ ), 47.1 (CH), 22.1 ( $\text{CH}_3$ ).

$^{31}\text{P}$  NMR (121 MHz,  $\text{CDCl}_3$ )  $\delta$  29.04.

HRMS (ESI)  $m/z$ :  $[\text{M}+\text{H}]^+$  Calcd for  $\text{C}_{28}\text{H}_{28}\text{N}_4\text{O}_3\text{P}$  499.1894; Found 499.1900.

IR (ATR): 2978, 1596, 1248, 1101, 1024, 931, 734, 532  $\text{cm}^{-1}$ .

### Di([1,1'-biphenyl]-4-yl)(2-(9-isopropyl-9H-purin-6-yl)phenyl)phosphine oxide (**3s**)

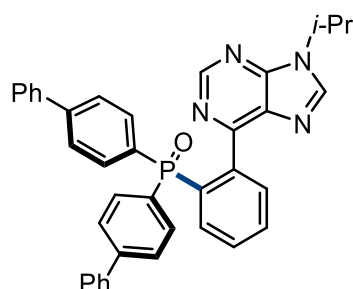

Prepared according to standard procedure A using  $[\text{Ru}(\text{OAc})_2(p\text{-cymene})]$  (10 mol %) on a 0.3 mmol scale, purification by column chromatography on silica gel ( $\text{DCM}/\text{MeOH} = 20/1$ ,  $R_f = 0.15$ ) yielded **3s** (88.6 mg, 50%) as a colorless sticky oil.

$^1\text{H}$  NMR (300 MHz,  $\text{CDCl}_3$ )  $\delta$  8.65 (s, 1H), 8.04 – 7.96 (m, 2H), 7.92 – 7.88 (m, 1H), 7.78 – 7.70 (m, 5H), 7.62 – 7.52 (m, 5H), 7.49 – 7.44 (m, 5H), 7.42 – 7.34 (m, 5H), 4.69 – 4.56 (m, 1H), 1.33 (d,  $J = 6.7$  Hz, 6H).

$^{13}\text{C}$  NMR (101 MHz,  $\text{CDCl}_3$ )  $\delta$  173.2 ( $\text{C}_q$ ), 156.6 (d,  $J = 3.3$  Hz) ( $\text{C}_q$ ), 151.0 (CH), 151.0 ( $\text{C}_q$ ), 143.4 (d,  $J = 2.7$  Hz) ( $\text{C}_q$ ), 141.9 (CH), 139.7 ( $\text{C}_q$ ), 139.6 (d,  $J = 7.4$  Hz) ( $\text{C}_q$ ), 135.4 (d,  $J = 10.3$  Hz) (CH), 132.4 (d,  $J = 101.9$  Hz) ( $\text{C}_q$ ), 132.2 (d,  $J = 10.2$  Hz) (CH), 132.1 (d,  $J = 107.8$  Hz) ( $\text{C}_q$ ), 131.6 (CH), 131.6 (CH), 129.1 (d,  $J = 12.0$  Hz) (CH), 128.8 (CH), 127.9 (CH), 127.0 (CH), 126.2 (d,  $J = 12.7$  Hz) (CH), 47.1 (CH), 22.0 ( $\text{CH}_3$ ).

$^{31}\text{P}$  NMR (121 MHz,  $\text{CDCl}_3$ )  $\delta$  29.01.

HRMS (ESI)  $m/z$ :  $[\text{M}+\text{H}]^+$  Calcd for  $\text{C}_{38}\text{H}_{32}\text{N}_4\text{OP}$  591.2308; Found 591.2320.

IR (ATR): 2978, 1597, 1391, 1177, 1102, 1007, 733, 529  $\text{cm}^{-1}$ .

### Ethyl (2-(9-isopropyl-9H-purin-6-yl)phenyl)(phenyl)phosphinate (**3t**)

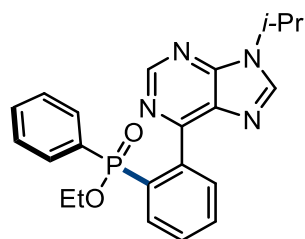

Prepared according to standard procedure A using  $[\text{Ru}(\text{OAc})_2(p\text{-cymene})]$  (10 mol %) on a 0.3 mmol



scale, purification by column chromatography on silica gel (DCM/MeOH = 20/1,  $R_f$  = 0.20) yielded **3t** (37.6 mg, 31%) as a colorless solid. M.p.: 153-154 °C

$^1\text{H}$  NMR (300 MHz,  $\text{CDCl}_3$ )  $\delta$  8.74 (s, 1H), 8.22 – 8.13 (m, 1H), 7.94 (s, 1H), 7.77 – 7.72 (m, 1H), 7.61 – 7.52 (m, 4H), 7.26 – 7.17 (m, 3H), 4.91 – 4.79 (m, 1H), 3.96 – 3.83 (m, 2H), 1.58 (d,  $J$  = 6.8 Hz, 6H), 1.10 (t,  $J$  = 7.0 Hz, 3H).

$^{13}\text{C}$  NMR (75 MHz,  $\text{CDCl}_3$ )  $\delta$  157.1 (d,  $J$  = 3.6 Hz) ( $\text{C}_q$ ), 151.2 ( $\text{C}_q$ ), 151.0 (CH), 142.1 (CH), 141.3 ( $\text{C}_q$ ), 139.6 (d,  $J$  = 9.1 Hz) ( $\text{C}_q$ ), 134.3 (d,  $J$  = 8.0 Hz) (CH), 133.1 (d,  $J$  = 140.9 Hz) ( $\text{C}_q$ ), 132.0 (CH), 131.7 (d,  $J$  = 2.6 Hz) (CH), 131.2 (d,  $J$  = 10.5 Hz) (CH), 131.0 (d,  $J$  = 2.9 Hz) (CH), 131.0 (d,  $J$  = 133.7 Hz) ( $\text{C}_q$ ), 129.0 (d,  $J$  = 12.0 Hz) (CH), 127.7 (d,  $J$  = 13.6 Hz) (CH), 60.7 (d,  $J$  = 5.7 Hz) ( $\text{CH}_2$ ), 47.3 (CH), 22.5 ( $\text{CH}_3$ ), 22.5 ( $\text{CH}_3$ ), 16.1 (d,  $J$  = 6.9 Hz) ( $\text{CH}_3$ ).

$^{31}\text{P}$  NMR (121 MHz,  $\text{CDCl}_3$ )  $\delta$  29.94.

HRMS (ESI)  $m/z$ :  $[\text{M}+\text{H}]^+$  Calcd for  $\text{C}_{22}\text{H}_{24}\text{N}_4\text{O}_2\text{P}$  407.1631; Found 407.1634.

IR (ATR): 2977, 1581, 1330, 1214, 1024, 930, 735, 648, 558  $\text{cm}^{-1}$ .

Isopropyl(2-(9-isopropyl-9H-purin-6-yl)phenyl)(phenyl)phosphine oxide (**3u**)

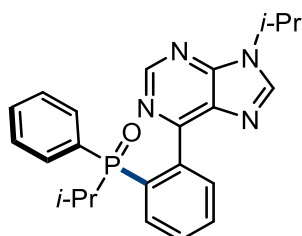

Prepared according to standard procedure A using  $[\text{Ru}(\text{OAc})_2(p\text{-cymene})]$  (10 mol %) on a 0.3 mmol scale, purification by column chromatography on silica gel (DCM/MeOH = 20/1,  $R_f$  = 0.16) yielded **3u** (72.2 mg, 60%) as a colorless sticky oil.

$^1\text{H}$  NMR (400 MHz,  $\text{CDCl}_3$ )  $\delta$  8.79 (s, 1H), 8.45 – 8.34 (m, 1H), 7.84 (s, 1H), 7.64 – 7.54 (m, 3H), 7.22 – 7.14 (m, 2H), 6.93 – 6.85 (m, 3H), 4.84 – 4.70 (m, 1H), 3.17 – 3.03 (m, 1H), 1.56 (dd,  $J$  = 6.8, 4.4 Hz, 6H), 1.31 – 1.15 (m, 6H).

$^{13}\text{C}$  NMR (101 MHz,  $\text{CDCl}_3$ )  $\delta$  157.2 (d,  $J$  = 3.2 Hz) ( $\text{C}_q$ ), 150.8 ( $\text{C}_q$ ), 150.6 (CH), 142.0 (CH), 138.3 (d,  $J$  = 7.8 Hz) ( $\text{C}_q$ ), 134.3 (d,  $J$  = 6.9 Hz) (CH), 132.9 (d,  $J$  = 95.7 Hz) ( $\text{C}_q$ ), 132.3 (d,  $J$  = 90.5 Hz) ( $\text{C}_q$ ), 131.7 ( $\text{C}_q$ ), 131.0 (d,  $J$  = 9.1 Hz) (CH), 130.9 (d,  $J$  = 2.4 Hz) (CH), 130.2 (d,  $J$  = 8.9 Hz) (CH), 129.7 (d,  $J$  = 2.6 Hz) (CH), 128.8 (d,  $J$  = 10.4 Hz) (CH), 127.1 (d,  $J$  = 11.3 Hz) (CH), 47.2 (CH), 26.8 (d,  $J$  = 73.3 Hz) (CH), 22.4 ( $\text{CH}_3$ ), 22.2 ( $\text{CH}_3$ ), 16.0 (d,  $J$  = 3.4 Hz) ( $\text{CH}_3$ ), 15.9 (d,  $J$  = 2.6 Hz) ( $\text{CH}_3$ ).  $^{31}\text{P}$  NMR (162 MHz,  $\text{CDCl}_3$ )  $\delta$  39.61.

HRMS (ESI)  $m/z$ :  $[\text{M}+\text{H}]^+$  Calcd for  $\text{C}_{23}\text{H}_{26}\text{N}_4\text{OP}$  405.1839; Found 405.1841.

IR (ATR): 2975, 1582, 1393, 1215, 1176, 1026, 734, 537  $\text{cm}^{-1}$ .

(2-(9-Isopropyl-9H-purin-6-yl)phenyl)di(thiophen-2-yl)phosphine oxide (**3v**)

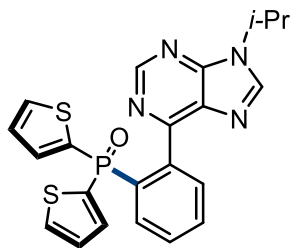

Prepared according to standard procedure A using [Ru(OAc)<sub>2</sub>(*p*-cymene)] (10 mol %) on a 0.3 mmol scale, purification by column chromatography on silica gel (DCM/MeOH = 20/1, R<sub>f</sub> = 0.26) yielded **3v** (28.3 mg, 21%) as a colorless sticky oil.

<sup>1</sup>H NMR (300 MHz, CDCl<sub>3</sub>) δ 8.72 (s, 1H), 8.09 – 8.01 (m, 3H), 7.74 – 7.67 (m, 1H), 7.61 – 7.47 (m, 5H), 7.00 – 6.96 (m, 2H), 4.96 – 4.82 (m, 1H), 1.63 (d, *J* = 6.8 Hz, 6H).

<sup>13</sup>C NMR (75 MHz, CDCl<sub>3</sub>) δ 156.1 (d, *J* = 3.4 Hz) (C<sub>q</sub>), 151.2 (C<sub>q</sub>), 151.1 (CH), 142.2 (CH), 139.4 (d, *J* = 7.3 Hz) (C<sub>q</sub>), 136.2 (d, *J* = 10.8 Hz) (CH), 135.8 (d, *J* = 123.5 Hz) (C<sub>q</sub>), 134.8 (d, *J* = 10.9 Hz) (CH), 133.1 (d, *J* = 113.4 Hz) (C<sub>q</sub>), 133.1 (d, *J* = 5.5 Hz) (CH), 132.0 (d, *J* = 2.7 Hz) (CH), 131.8 (d, *J* = 10.0 Hz) (CH), 131.7 (C<sub>q</sub>), 129.2 (d, *J* = 12.9 Hz) (CH), 127.5 (d, *J* = 14.9 Hz) (CH), 47.2 (CH), 22.5 (CH<sub>3</sub>).

<sup>31</sup>P NMR (121 MHz, CDCl<sub>3</sub>) δ 14.49.

HRMS (ESI) *m/z*: [M+H]<sup>+</sup> Calcd for C<sub>22</sub>H<sub>20</sub>N<sub>4</sub>OPS<sub>2</sub> 451.0811; Found 451.0817.

IR (ATR): 2977, 1576, 1331, 1190, 1004, 931, 715, 527 cm<sup>-1</sup>.

(2-(9-Isopropyl-9H-purin-6-yl)phenyl)dimethylphosphine oxide (**3w**)

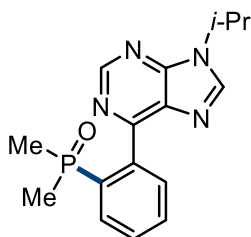

Prepared according to standard procedure A using [Ru(OAc)<sub>2</sub>(*p*-cymene)] (10 mol %) on a 0.3 mmol scale, purification by column chromatography on silica gel (DCM/MeOH = 20/1, R<sub>f</sub> = 0.04) yielded **3w** (55.6 mg, 59%) as a colorless solid. M.p.: 210-211 °C

<sup>1</sup>H NMR (300 MHz, CDCl<sub>3</sub>) δ 8.97 (s, 1H), 8.34 – 8.23 (m, 1H), 8.16 (s, 1H), 8.05 – 7.97 (m, 1H), 7.69 – 7.59 (m, 2H), 5.06 – 4.90 (m, 1H), 1.73 – 1.64 (m, 12H).

<sup>13</sup>C NMR (75 MHz, CDCl<sub>3</sub>) δ 157.3 (d, *J* = 2.6 Hz) (C<sub>q</sub>), 151.8 (C<sub>q</sub>), 150.9 (CH), 142.8 (CH), 137.4 (d, *J* = 7.2 Hz) (C<sub>q</sub>), 134.5 (d, *J* = 91.6 Hz) (C<sub>q</sub>), 133.5 (d, *J* = 7.9 Hz) (CH), 132.3 (C<sub>q</sub>), 132.1 (d, *J* = 9.0 Hz) (CH), 131.2 (d, *J* = 2.6 Hz) (CH), 129.6 (d, *J* = 10.9 Hz) (CH), 47.5 (CH), 22.5 (CH<sub>3</sub>), 19.5 (d, *J* = 73.1 Hz) (CH<sub>3</sub>).

<sup>31</sup>P NMR (121 MHz, CDCl<sub>3</sub>) δ 36.29.

HRMS (ESI) *m/z*: [M+H]<sup>+</sup> Calcd for C<sub>16</sub>H<sub>20</sub>N<sub>4</sub>OP 315.1369; Found 315.1371.

IR (ATR): 2977, 1582, 1331, 1172, 932, 734, 649, 445 cm<sup>-1</sup>.

7-Chloro-5-(2-(diphenylphosphoryl)phenyl)-1-methyl-1,3-dihydro-2H-benzo[*e*][1,4]diazepin-2-one (**3x**)

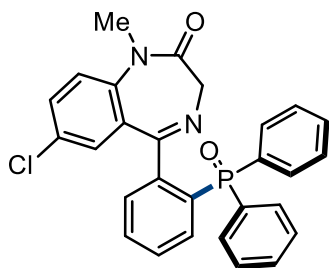

Prepared according to standard procedure A using  $[\text{Ru}(\text{OAc})_2(p\text{-cymene})]$  (10 mol %) on a 0.3 mmol scale, purification by column chromatography on silica gel ( $\text{DCM}/\text{MeOH} = 20/1$ ,  $R_f = 0.18$ ) yielded **3x** (130.6 mg, 90%) as a colorless solid. M.p.: 238-239 °C

$^1\text{H}$  NMR (300 MHz,  $\text{CDCl}_3$ )  $\delta$  7.54 – 7.48 (m, 1H), 7.42 – 7.25 (m, 12H), 7.24 – 7.17 (m, 1H), 7.12 – 7.03 (m, 2H), 6.69 (d,  $J = 2.1$  Hz, 1H), 4.46 (d,  $J = 10.9$  Hz, 1H), 3.49 (d,  $J = 11.2$  Hz, 1H), 3.38 (s, 3H).

$^{13}\text{C}$  NMR (75 MHz,  $\text{CDCl}_3$ )  $\delta$  169.7 (d,  $J = 3.6$  Hz) ( $\text{C}_q$ ), 168.3 ( $\text{C}_q$ ), 143.7 (d,  $J = 6.4$  Hz) ( $\text{C}_q$ ), 142.3 ( $\text{C}_q$ ), 134.1 (d,  $J = 11.6$  Hz) (CH), 132.0 (d,  $J = 100.1$  Hz) ( $\text{C}_q$ ), 131.6 (CH), 131.6 (CH), 131.5 (CH), 130.9 (CH), 129.5 (d,  $J = 168.7$  Hz) ( $\text{C}_q$ ), 129.4 (CH), 128.6 (d,  $J = 12.2$  Hz) (CH), 128.2 (d,  $J = 12.3$  Hz) (CH), 122.4 (CH), 56.3 ( $\text{CH}_2$ ), 35.4 ( $\text{CH}_3$ ).

$^{31}\text{P}$  NMR (121 MHz,  $\text{CDCl}_3$ )  $\delta$  30.64.

HRMS (ESI)  $m/z$ :  $[\text{M}+\text{H}]^+$  Calcd for  $\text{C}_{28}\text{H}_{23}\text{ClN}_2\text{O}_2\text{P}$  485.1180; Found 485.1190.

IR (ATR): 3057, 1666, 1485, 1402, 1116, 918, 717, 526  $\text{cm}^{-1}$ .

7-Chloro-5-(2-(dimethylphosphoryl)phenyl)-1-methyl-1,3-dihydro-2H-benzo[e][1,4]diazepin-2-one (**3y**)

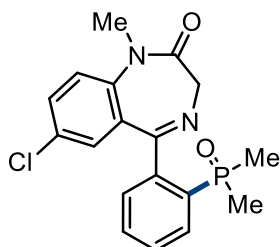

Prepared according to standard procedure A using  $[\text{Ru}(\text{OAc})_2(p\text{-cymene})]$  (10 mol %) on a 0.3 mmol scale, purification by column chromatography on silica gel ( $\text{DCM}/\text{MeOH} = 20/1$ ,  $R_f = 0.11$ ) yielded **3y** (96.6 mg, 89%) as a colorless sticky oil.

$^1\text{H}$  NMR (300 MHz,  $\text{CDCl}_3$ )  $\delta$  7.82 (dd,  $J = 11.9, 7.5$  Hz, 1H), 7.51 – 7.37 (m, 3H), 7.22 (d,  $J = 8.8$  Hz, 1H), 7.16 – 7.09 (m, 1H), 7.03 (d,  $J = 2.4$  Hz, 1H), 4.74 (d,  $J = 10.3$  Hz, 1H), 3.77 (d,  $J = 10.2$  Hz, 1H), 3.37 (s, 3H), 1.69 (dd,  $J = 48.9, 12.9$  Hz, 6H).

$^{13}\text{C}$  NMR (75 MHz,  $\text{CDCl}_3$ )  $\delta$  170.0 ( $\text{C}_q$ ), 168.6 ( $\text{C}_q$ ), 142.2 ( $\text{C}_q$ ), 142.1 ( $\text{C}_q$ ), 134.8 (d,  $J = 93.9$  Hz) ( $\text{C}_q$ ), 131.7 (CH), 131.5 (d,  $J = 3.5$  Hz) (CH), 131.2 (d,  $J = 8.7$  Hz) (CH), 131.0 (d,  $J = 1.8$  Hz) (CH), 130.0 (d,  $J = 117.6$  Hz) ( $\text{C}_q$ ), 129.6 (CH), 129.4 (CH), 129.3 ( $\text{C}_q$ ), 122.5 (CH), 56.5 ( $\text{CH}_2$ ), 35.1 ( $\text{CH}_3$ ), 19.8 (d,  $J = 29.6$  Hz) ( $\text{CH}_3$ ), 18.8 (d,  $J = 28.1$  Hz) ( $\text{CH}_3$ ).

$^{31}\text{P}$  NMR (162 MHz,  $\text{CDCl}_3$ )  $\delta$  36.45.

HRMS (ESI)  $m/z$ :  $[\text{M}+\text{H}]^+$  Calcd for  $\text{C}_{18}\text{H}_{19}\text{ClN}_2\text{O}_2\text{P}$  361.0867; Found 361.0870.

IR (ATR): 2915, 1665, 1470, 1300, 1168, 931, 722, 433  $\text{cm}^{-1}$ .

Methyl 3-(4-(2-(diphenylphosphoryl)phenyl)-5-phenyloxazol-2-yl)propanoate (**3z**)

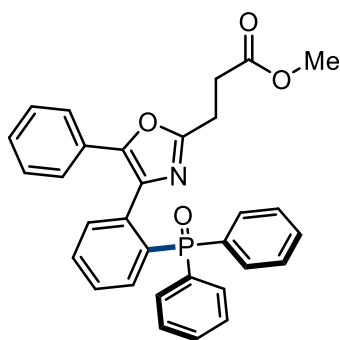

Prepared according to standard procedure A using  $[\text{Ru}(\text{OAc})_2(p\text{-cymene})]$  (10 mol %) on a 0.3 mmol scale, purification by column chromatography on silica gel (DCM/MeOH = 20/1,  $R_f = 0.24$ ) yielded **3z** (71.5 mg, 47%) as a colorless sticky oil.

$^1\text{H}$  NMR (300 MHz,  $\text{CDCl}_3$ )  $\delta$  8.07 – 7.96 (m, 1H), 7.58 – 7.46 (m, 6H), 7.33 – 7.25 (m, 3H), 7.20 – 7.08 (m, 7H), 7.06 – 6.99 (m, 2H), 3.61 (s, 3H), 2.82 (t,  $J = 7.6$  Hz, 2H), 2.58 (t,  $J = 7.6$  Hz, 2H).

$^{13}\text{C}$  NMR (101 MHz,  $\text{CDCl}_3$ )  $\delta$  172.4 ( $\text{C}_q$ ), 159.9 ( $\text{C}_q$ ), 146.1 ( $\text{C}_q$ ), 136.3 (d,  $J = 8.3$  Hz) ( $\text{C}_q$ ), 134.9 (d,  $J = 9.4$  Hz) (CH), 133.3 ( $\text{C}_q$ ), 133.0 (d,  $J = 100.4$  Hz) ( $\text{C}_q$ ), 132.7 (d,  $J = 103.7$  Hz) ( $\text{C}_q$ ), 132.2 (CH), 132.0 (d,  $J = 9.6$  Hz) (CH), 131.8 (d,  $J = 10.1$  Hz) (CH), 131.3 (d,  $J = 2.7$  Hz) (CH), 128.8 (d,  $J = 11.6$  Hz) (CH), 128.2 (CH), 127.8 ( $\text{C}_q$ ), 127.7 (CH), 127.6 (CH), 125.0 (CH), 51.8 ( $\text{CH}_3$ ), 30.1 ( $\text{CH}_2$ ), 22.9 ( $\text{CH}_2$ ).

$^{31}\text{P}$  NMR (121 MHz,  $\text{CDCl}_3$ )  $\delta$  28.61.

HRMS (ESI)  $m/z$ :  $[\text{M}+\text{H}]^+$  Calcd for  $\text{C}_{31}\text{H}_{27}\text{NO}_4\text{P}$  508.1672; Found 508.1677.

IR (ATR): 3052, 1737, 1437, 1331, 1179, 1118, 692, 545  $\text{cm}^{-1}$ .

(2-(9-((3aR,4R,6R,6aR)-6-(Hydroxymethyl)-2,2-dimethyltetrahydrofuro[3,4-d][1,3]dioxol-4-yl)-9H-purin-6-yl)phenyl)diphenylphosphine oxide (**3aa**)

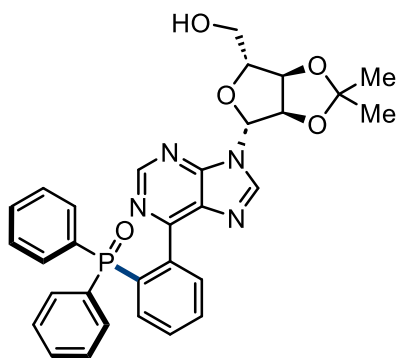

Prepared according to standard procedure A using  $[\text{Ru}(\text{OAc})_2(p\text{-cymene})]$  (10 mol %) on a 0.3 mmol scale, purification by column chromatography on silica gel (DCM/MeOH = 20/1,  $R_f = 0.16$ ) yielded **3aa** (73.3 mg, 43%) as a colorless sticky oil.

$^1\text{H}$  NMR (300 MHz,  $\text{CDCl}_3$ )  $\delta$  8.50 (s, 1H), 8.02 (s, 1H), 7.84 – 7.71 (m, 2H), 7.66 – 7.59 (m, 1H), 7.57 – 7.45 (m, 5H), 7.32 – 7.24 (m, 2H), 7.22 – 7.14 (m, 4H), 5.84 (d,  $J = 4.5$  Hz, 1H), 5.49 (s, 1H), 5.12 – 4.99 (m, 2H), 4.47 – 4.40 (m, 1H), 3.83 (dd,  $J = 12.6, 1.5$  Hz, 1H), 3.68 (d,  $J = 11.0$  Hz, 1H), 1.58 (s, 3H), 1.32 (s, 3H).

$^{13}\text{C}$  NMR (75 MHz,  $\text{CDCl}_3$ )  $\delta$  157.9 (d,  $J = 3.2$  Hz) ( $\text{C}_q$ ), 150.7 (CH), 150.1 ( $\text{C}_q$ ), 144.1 (CH), 139.2 (d,  $J = 6.9$  Hz) ( $\text{C}_q$ ), 135.3 (d,  $J = 10.4$  Hz) (CH), 134.2 (d,  $J = 4.6$  Hz) ( $\text{C}_q$ ), 132.5 (d,  $J = 100.7$  Hz) ( $\text{C}_q$ ),

132.3 (d,  $J = 97.3$  Hz) (C<sub>q</sub>), 131.7 (CH), 131.6 (CH), 131.1 (d,  $J = 2.7$  Hz) (CH), 129.3 (d,  $J = 12.0$  Hz) (CH), 127.9 (d,  $J = 2.1$  Hz) (CH), 127.7 (d,  $J = 2.2$  Hz) (CH), 114.1 (C<sub>q</sub>), 93.7 (CH), 86.2 (CH), 82.9 (CH), 81.5 (CH), 63.2 (CH<sub>2</sub>), 27.5 (CH<sub>3</sub>), 25.2 (CH<sub>3</sub>).

<sup>31</sup>P NMR (121 MHz, CDCl<sub>3</sub>)  $\delta$  29.19.

HRMS (ESI)  $m/z$ : [M+H]<sup>+</sup> Calcd for C<sub>31</sub>H<sub>30</sub>N<sub>4</sub>O<sub>5</sub>P 569.1948; Found 569.1966.

IR (ATR): 2989, 1579, 1384, 1171, 1070, 849, 719, 535 cm<sup>-1</sup>.

#### (4-(9-Isopropyl-9H-purin-6-yl)phenyl)diphenylphosphine oxide (**4a**)

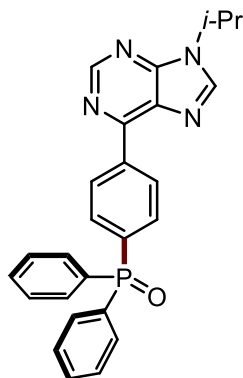

Prepared according to standard procedure B using [RuCl<sub>3</sub>·3H<sub>2</sub>O] (10 mol %) on a 0.3 mmol scale, purification by column chromatography on silica gel (DCM/MeOH = 20/1, R<sub>f</sub> = 0.44) yielded **4a** (107.7 mg, 82%) as a colorless solid. M.p.: 185-186 °C

<sup>1</sup>H NMR (400 MHz, CDCl<sub>3</sub>)  $\delta$  8.87 (s, 1H), 8.79 (dd,  $J = 8.3, 2.5$  Hz, 2H), 8.10 (s, 1H), 7.78 (dd,  $J = 11.6, 8.3$  Hz, 2H), 7.65 – 7.54 (m, 4H), 7.42 – 7.36 (m, 2H), 7.34 – 7.28 (m, 4H), 4.85 – 4.74 (m, 1H), 1.49 (d,  $J = 6.8$  Hz, 6H).

<sup>13</sup>C NMR (101 MHz, CDCl<sub>3</sub>)  $\delta$  152.5 (C<sub>q</sub>), 151.9 (C<sub>q</sub>), 151.5 (CH), 142.4 (CH), 138.8 (d,  $J = 2.9$  Hz) (C<sub>q</sub>), 134.3 (d,  $J = 102.6$  Hz) (C<sub>q</sub>), 131.9 (d,  $J = 104.3$  Hz) (C<sub>q</sub>), 131.8 (d,  $J = 10.0$  Hz) (CH), 131.6 (d,  $J = 4.5$  Hz) (CH), 131.6 (d,  $J = 2.6$  Hz) (CH), 131.3 (C<sub>q</sub>), 129.1 (d,  $J = 12.0$  Hz) (CH), 128.1 (d,  $J = 12.1$  Hz) (CH), 47.0 (CH), 22.0 (CH<sub>3</sub>).

<sup>31</sup>P NMR (162 MHz, CDCl<sub>3</sub>)  $\delta$  28.57.

HRMS (ESI)  $m/z$ : [M+H]<sup>+</sup> Calcd for C<sub>26</sub>H<sub>24</sub>N<sub>4</sub>OP 439.1682; Found 439.1687.

IR (ATR): 3058, 2978, 1576, 1326, 1184, 1117, 805, 537 cm<sup>-1</sup>.

#### (4-(9-Methyl-9H-purin-6-yl)phenyl)diphenylphosphine oxide (**4b**)

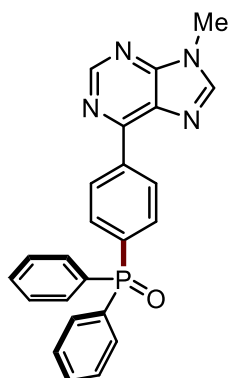

Prepared according to standard procedure B using [RuCl<sub>3</sub>·3H<sub>2</sub>O] (10 mol %) on a 0.3 mmol scale, purification by column chromatography on silica gel (DCM/MeOH = 20/1, R<sub>f</sub> = 0.40) yielded **4b** (52.9 mg, 43%) as a colorless sticky oil.

<sup>1</sup>H NMR (300 MHz, CDCl<sub>3</sub>) δ 9.04 (s, 1H), 8.85 (dd, *J* = 8.4, 2.6 Hz, 2H), 8.12 (s, 1H), 7.90 – 7.83 (m, 2H), 7.74 – 7.66 (m, 4H), 7.56 – 7.52 (m, 2H), 7.49 – 7.44 (m, 4H), 3.94 (s, 3H).

<sup>13</sup>C NMR (75 MHz, CDCl<sub>3</sub>) δ 153.4 (d, *J* = 0.9 Hz) (C<sub>q</sub>), 153.0 (C<sub>q</sub>), 152.4 (CH), 145.4 (CH), 139.0 (d, *J* = 2.9 Hz) (C<sub>q</sub>), 134.7 (d, *J* = 102.8 Hz) (C<sub>q</sub>), 132.4 (d, *J* = 10.1 Hz) (CH), 132.2 (CH), 132.1 (d, *J* = 104.6 Hz) (C<sub>q</sub>), 132.1 (d, *J* = 2.9 Hz) (CH), 131.2 (C<sub>q</sub>), 129.6 (d, *J* = 12.1 Hz) (CH), 128.5 (d, *J* = 12.2 Hz) (CH), 29.9 (CH<sub>3</sub>).

<sup>31</sup>P NMR (121 MHz, CDCl<sub>3</sub>) δ 29.17.

HRMS (ESI) *m/z*: [M+H]<sup>+</sup> Calcd for C<sub>24</sub>H<sub>20</sub>N<sub>4</sub>OP 411.1369; Found 411.1368.

IR (ATR): 3059, 1578, 1437, 1180, 1121, 927, 733, 537 cm<sup>-1</sup>.

(4-(9-Benzyl-9H-purin-6-yl)phenyl)diphenylphosphine oxide (**4c**)

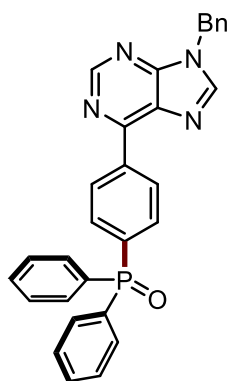

Prepared according to standard procedure B using [RuCl<sub>3</sub>·3H<sub>2</sub>O] (10 mol %) on a 0.3 mmol scale, purification by column chromatography on silica gel (DCM/MeOH = 20/1, R<sub>f</sub> = 0.38) yielded **4c** (76.0 mg, 52%) as a colorless sticky oil.

<sup>1</sup>H NMR (400 MHz, CDCl<sub>3</sub>) δ 9.06 (s, 1H), 8.86 (dd, *J* = 8.2, 2.6 Hz, 2H), 8.10 (s, 1H), 7.86 (dd, *J* = 11.6, 8.2 Hz, 2H), 7.73 – 7.67 (m, 4H), 7.57 – 7.52 (m, 2H), 7.50 – 7.44 (m, 4H), 7.38 – 7.30 (m, 5H), 5.47 (s, 2H).

<sup>13</sup>C NMR (101 MHz, CDCl<sub>3</sub>) δ 153.5 (C<sub>q</sub>), 152.70 (C<sub>q</sub>), 152.6 (CH), 144.6 (CH), 138.9 (d, *J* = 2.9 Hz) (C<sub>q</sub>), 134.9 (d, *J* = 102.7 Hz) (C<sub>q</sub>), 135.0 (C<sub>q</sub>), 132.3 (d, *J* = 10.0 Hz) (CH), 132.2 (d, *J* = 104.4 Hz) (C<sub>q</sub>), 132.1 (CH), 132.0 (d, *J* = 3.9 Hz) (CH), 131.2 (C<sub>q</sub>), 129.6 (d, *J* = 12.0 Hz) (CH), 129.1 (CH), 128.6 (d, *J* = 4.4 Hz) (CH), 128.4 (CH), 127.8 (CH), 47.3 (CH<sub>2</sub>).

<sup>31</sup>P NMR (162 MHz, CDCl<sub>3</sub>) δ 28.91.

HRMS (ESI) *m/z*: [M+H]<sup>+</sup> Calcd for C<sub>30</sub>H<sub>24</sub>N<sub>4</sub>OP 487.1682; Found 487.1695.

IR (ATR): 3061, 1577, 1325, 1119, 908, 722, 645, 536 cm<sup>-1</sup>.

(2R,3R,4R,5R)-2-(Acetoxymethyl)-5-(6-(4-(diphenylphosphoryl)phenyl)-9H-purin-9-yl)tetrahydrofuran-3,4-diyl diacetate (**4d**)

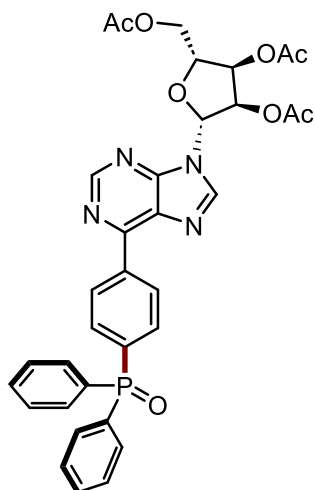

Prepared according to standard procedure B using  $[\text{RuCl}_3 \cdot 3\text{H}_2\text{O}]$  (10 mol %) on a 0.3 mmol scale, purification by column chromatography on silica gel (DCM/MeOH = 20/1,  $R_f = 0.40$ ) yielded **4d** (45.3 mg, 23%) as a colorless sticky oil.

$^1\text{H}$  NMR (300 MHz,  $\text{CDCl}_3$ )  $\delta$  9.05 (s, 1H), 8.84 (dd,  $J = 8.6, 2.6$  Hz, 2H), 8.29 (s, 1H), 7.91 – 7.84 (m, 2H), 7.75 – 7.67 (m, 4H), 7.59 – 7.53 (m, 2H), 7.51 – 7.45 (m, 4H), 6.29 (d,  $J = 5.2$  Hz, 1H), 6.00 (t,  $J = 5.4$  Hz, 1H), 5.73 – 5.66 (m, 1H), 4.51 – 4.37 (m, 3H), 2.18 – 2.07 (m, 9H).

$^{13}\text{C}$  NMR (75 MHz,  $\text{CDCl}_3$ )  $\delta$  170.3 ( $\text{C}_q$ ), 169.6 ( $\text{C}_q$ ), 169.4 ( $\text{C}_q$ ), 154.1 ( $\text{C}_q$ ), 152.7 (CH), 152.2 ( $\text{C}_q$ ), 143.1 (CH), 138.6 (d,  $J = 2.9$  Hz) ( $\text{C}_q$ ), 135.2 (d,  $J = 102.4$  Hz) ( $\text{C}_q$ ), 132.4 (d,  $J = 10.0$  Hz) (CH), 132.2 (d,  $J = 104.5$  Hz) ( $\text{C}_q$ ), 132.1 (d,  $J = 10.0$  Hz) (CH), 132.0 (CH), 132.1 ( $\text{C}_q$ ), 129.6 (d,  $J = 12.0$  Hz), (CH) 128.6 (d,  $J = 12.2$  Hz) (CH), 86.5 (CH), 80.4 (CH), 73.1 (CH), 70.6 (CH), 63.0 ( $\text{CH}_2$ ), 20.8 ( $\text{CH}_3$ ), 20.5 ( $\text{CH}_3$ ), 20.4 ( $\text{CH}_3$ ).

$^{31}\text{P}$  NMR (121 MHz,  $\text{CDCl}_3$ )  $\delta$  28.83.

HRMS (ESI)  $m/z$ :  $[\text{M}+\text{H}]^+$  Calcd for  $\text{C}_{34}\text{H}_{32}\text{N}_4\text{O}_8\text{P}$  655.1952; Found 655.1965.

IR (ATR): 2925, 1746, 1580, 1366, 1214, 1046, 739, 537  $\text{cm}^{-1}$ .

(2-Fluoro-4-(9-isopropyl-9H-purin-6-yl)phenyl)diphenylphosphine oxide (**4e**)

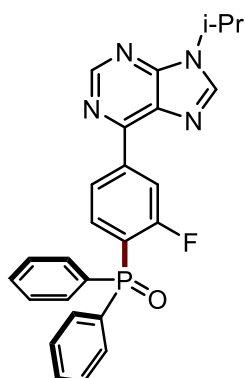

Prepared according to standard procedure A using  $[\text{Ru}(\text{OAc})_2(p\text{-cymene})]$  (10 mol %) on a 0.3 mmol scale, purification by column chromatography on silica gel (DCM/MeOH = 20/1,  $R_f = 0.40$ ) yielded **4e** (93.1 mg, 68%) as a colorless sticky oil.

$^1\text{H}$  NMR (300 MHz,  $\text{CDCl}_3$ )  $\delta$  9.03 (s, 1H), 8.83 – 8.72 (m, 1H), 8.64 – 8.52 (m, 1H), 8.22 (s, 1H), 8.15 – 8.03 (m, 1H), 7.85 – 7.73 (m, 4H), 7.61 – 7.45 (m, 6H), 5.07 – 4.90 (m, 1H), 1.68 (d,  $J = 6.8$  Hz, 6H).

$^{13}\text{C}$  NMR (75 MHz,  $\text{CDCl}_3$ )  $\delta$  162.9 (d,  $J_{\text{C-F}} = 249.8$  Hz) ( $\text{C}_q$ ), 152.5 ( $\text{C}_q$ ), 151.9 (CH), 151.8 (d,  $J = 2.5$

Hz) (C<sub>q</sub>), 142.8 (CH), 142.4 (dd, *J* = 8.4, 2.3 Hz) (C<sub>q</sub>), 135.1 – 134.5 (m) (CH), 132.2 (d, *J* = 2.8 Hz) (CH), 131.9 (d, *J* = 108.2 Hz) (C<sub>q</sub>), 131.7 (dd, *J* = 10.6, 1.8 Hz) (CH), 128.5 (d, *J* = 12.8 Hz) (CH), 125.6 (dd, *J* = 10.6, 3.3 Hz) (CH), 122.1 (dd, *J* = 19.1 Hz, 99.0 Hz) (C<sub>q</sub>), 116.9 (dd, *J* = 25.1, 5.7 Hz) (CH), 47.5 (CH), 22.5 (CH<sub>3</sub>).

<sup>31</sup>P NMR (121 MHz, CDCl<sub>3</sub>) δ 24.44.

<sup>19</sup>F NMR (282 MHz, CDCl<sub>3</sub>) δ -98.88.

HRMS (ESI) *m/z*: [M+H]<sup>+</sup> Calcd for C<sub>26</sub>H<sub>23</sub>FN<sub>4</sub>OP 457.1588; Found 457.1600.

IR (ATR): 3057, 2978, 1574, 1436, 1104, 897, 690, 521 cm<sup>-1</sup>.

(4-(9-Isopropyl-9H-purin-6-yl)-2-methylphenyl)diphenylphosphine oxide (**4f**)

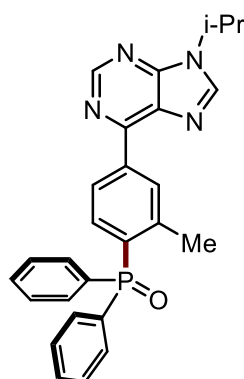

Prepared according to standard procedure A using [Ru(OAc)<sub>2</sub>(*p*-cymene)] (10 mol %) on a 0.3 mmol scale, purification by column chromatography on silica gel (DCM/MeOH = 20/1, R<sub>f</sub> = 0.43) yielded **4f** (50.2 mg, 37%) as a colorless sticky oil.

<sup>1</sup>H NMR (300 MHz, CDCl<sub>3</sub>) δ 9.04 (s, 1H), 8.67 – 8.51 (m, 2H), 8.20 (s, 1H), 7.76 – 7.66 (m, 4H), 7.61 – 7.54 (m, 2H), 7.53 – 7.45 (m, 4H), 7.24 (dd, *J* = 13.8, 8.1 Hz, 1H), 5.08 – 4.91 (m, 1H), 2.61 (s, 3H), 1.68 (d, *J* = 6.8 Hz, 6H).

<sup>13</sup>C NMR (75 MHz, CDCl<sub>3</sub>) δ 152.9 (d, *J* = 94.3 Hz) (C<sub>q</sub>), 152.0 (CH), 143.7 (d, *J* = 8.1 Hz) (C<sub>q</sub>), 142.4 (CH), 139.1 (d, *J* = 2.6 Hz) (C<sub>q</sub>), 133.8 (d, *J* = 13.6 Hz) (CH), 132.4 (d, *J* = 103.8 Hz) (C<sub>q</sub>), 132.4 (C<sub>q</sub>), 132.2 (d, *J* = 10.3 Hz) (CH), 132.0 (CH), 131.9 (d, *J* = 2.6 Hz) (CH), 131.8 (C<sub>q</sub>), 128.6 (d, *J* = 12.1 Hz) (CH), 126.6 (d, *J* = 12.8 Hz) (CH), 47.4 (CH), 22.5 (CH<sub>3</sub>), 21.8 (d, *J* = 4.4 Hz) (CH<sub>3</sub>).

<sup>31</sup>P NMR (121 MHz, CDCl<sub>3</sub>) δ 31.59.

HRMS (ESI) *m/z*: [M+H]<sup>+</sup> Calcd for C<sub>27</sub>H<sub>26</sub>N<sub>4</sub>OP 453.1839; Found 453.1828.

IR (ATR): 2977, 2226, 1573, 1325, 1116, 807, 693, 547 cm<sup>-1</sup>.

Bis(4-chlorophenyl)(4-(9-isopropyl-9H-purin-6-yl)phenyl)phosphine oxide (**4g**)



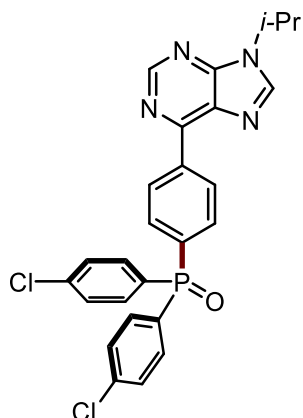

Prepared according to standard procedure B using  $[\text{RuCl}_3 \cdot 3\text{H}_2\text{O}]$  (10 mol %) on a 0.3 mmol scale, purification by column chromatography on silica gel (DCM/MeOH = 20/1,  $R_f = 0.44$ ) yielded **4g** (94.2 mg, 62%) as a colorless sticky oil.

$^1\text{H}$  NMR (300 MHz,  $\text{CDCl}_3$ )  $\delta$  8.99 (s, 1H), 8.85 (dd,  $J = 8.5, 2.7$  Hz, 2H), 8.18 (s, 1H), 7.83 – 7.75 (m, 2H), 7.63 – 7.55 (m, 4H), 7.45 – 7.40 (m, 4H), 4.96 (h,  $J = 6.8$  Hz, 1H), 1.64 (d,  $J = 6.8$  Hz, 6H).

$^{13}\text{C}$  NMR (75 MHz,  $\text{CDCl}_3$ )  $\delta$  152.9 (d,  $J = 1.0$  Hz) ( $\text{C}_q$ ), 152.3 ( $\text{C}_q$ ), 152.0 (CH), 142.6 (CH), 139.5 (d,  $J = 2.9$  Hz) ( $\text{C}_q$ ), 138.9 (d,  $J = 3.4$  Hz) ( $\text{C}_q$ ), 133.5 (d,  $J = 104.7$  Hz) ( $\text{C}_q$ ), 133.3 (d,  $J = 10.9$  Hz) (CH), 132.1 (d,  $J = 10.2$  Hz) (CH), 131.7 ( $\text{C}_q$ ), 130.3 (d,  $J = 106.0$  Hz) ( $\text{C}_q$ ), 129.7 (d,  $J = 12.2$  Hz) (CH), 129.0 (d,  $J = 12.8$  Hz) (CH), 47.4 (CH), 22.4 ( $\text{CH}_3$ ).

$^{31}\text{P}$  NMR (121 MHz,  $\text{CDCl}_3$ )  $\delta$  27.54.

HRMS (ESI)  $m/z$ :  $[\text{M}+\text{H}]^+$  Calcd for  $\text{C}_{26}\text{H}_{22}\text{Cl}_2\text{N}_4\text{OP}$  507.0903; Found 507.0913.

IR (ATR): 2977, 1576, 1388, 1177, 1084, 1013, 930, 729, 562  $\text{cm}^{-1}$ .

#### (4-(9-Isopropyl-9H-purin-6-yl)phenyl)di-p-tolylphosphine oxide (**4h**)

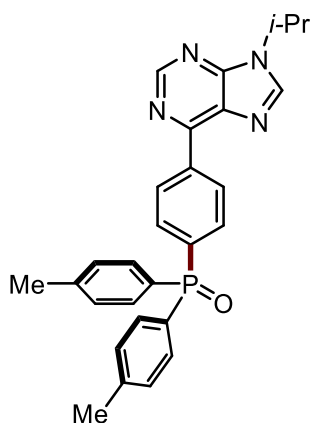

Prepared according to standard procedure B using  $[\text{RuCl}_3 \cdot 3\text{H}_2\text{O}]$  (10 mol %) on a 0.3 mmol scale, purification by column chromatography on silica gel (DCM/MeOH = 20/1,  $R_f = 0.42$ ) yielded **4h** (62.8 mg, 45%) as a colorless sticky oil.

$^1\text{H}$  NMR (400 MHz,  $\text{CDCl}_3$ )  $\delta$  9.07 (s, 1H), 8.89 – 8.85 (m, 2H), 8.23 (s, 1H), 7.93 – 7.87 (m, 2H), 7.65 – 7.59 (m, 4H), 7.32 – 7.29 (m, 4H), 5.10 – 4.96 (m, 1H), 2.44 (s, 6H), 1.72 (d,  $J = 6.7$  Hz, 6H).

$^{13}\text{C}$  NMR (75 MHz,  $\text{CDCl}_3$ )  $\delta$  153.5 ( $\text{C}_q$ ), 152.3 ( $\text{C}_q$ ), 152.1 (CH), 142.5 (CH), 142.4 ( $\text{C}_q$ ), 138.9 (d,  $J = 3.0$  Hz) ( $\text{C}_q$ ), 135.3 (d,  $J = 102.7$  Hz) ( $\text{C}_q$ ), 132.3 (d,  $J = 10.1$  Hz) (CH), 132.1 (d,  $J = 10.1$  Hz) (CH),

131.8 (C<sub>q</sub>), 129.5 (d, *J* = 12.0 Hz) (CH), 129.2 (d, *J* = 12.5 Hz) (CH), δ 129.2 (d, *J* = 106.8 Hz) (C<sub>q</sub>), 47.4 (CH), 22.5 (CH<sub>3</sub>), 21.6 (CH<sub>3</sub>).

<sup>31</sup>P NMR (162 MHz, CDCl<sub>3</sub>) δ 29.16.

HRMS (ESI) *m/z*: [M+H]<sup>+</sup> Calcd for C<sub>28</sub>H<sub>28</sub>N<sub>4</sub>OP 467.1995; Found 467.2016.

IR (ATR): 2904, 1577, 1327, 1183, 1116, 930, 731, 542 cm<sup>-1</sup>.

(4-(9-Isopropyl-9H-purin-6-yl)phenyl)bis(4-methoxyphenyl)phosphine oxide (**4i**)

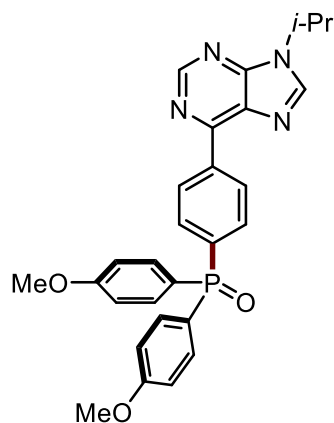

Prepared according to standard procedure B using [RuCl<sub>3</sub>·3H<sub>2</sub>O] (10 mol %) on a 0.3 mmol scale, purification by column chromatography on silica gel (DCM/MeOH = 20/1, R<sub>f</sub> = 0.33) yielded **4i** (96.6 mg, 65%) as a colorless sticky oil.

<sup>1</sup>H NMR (300 MHz, CDCl<sub>3</sub>) δ 8.99 (d, *J* = 1.2 Hz, 1H), 8.81 (dd, *J* = 8.2, 2.5 Hz, 2H), 8.17 (s, 1H), 7.90 – 7.81 (m, 2H), 7.62 – 7.53 (m, 4H), 6.95 – 6.91 (m, 4H), 5.02 – 4.87 (m, 1H), 3.80 (d, *J* = 1.3 Hz, 6H), 1.63 (d, *J* = 6.8 Hz, 6H).

<sup>13</sup>C NMR (75 MHz, CDCl<sub>3</sub>) δ 162.4 (d, *J* = 2.8 Hz) (C<sub>q</sub>), 153.4 (C<sub>q</sub>), 152.2 (C<sub>q</sub>), 152.0 (CH), 142.5 (CH), 138.8 (d, *J* = 2.9 Hz) (C<sub>q</sub>), 135.5 (d, *J* = 103.5 Hz) (C<sub>q</sub>), 133.9 (d, *J* = 11.3 Hz) (CH), 132.2 (d, *J* = 10.1 Hz) (CH), 131.7 (C<sub>q</sub>), 129.4 (d, *J* = 12.0 Hz) (CH), 123.6 (d, *J* = 111.2 Hz) (C<sub>q</sub>), 114.0 (d, *J* = 13.2 Hz), 55.2 (CH), 47.3 (CH<sub>3</sub>), 22.4 (CH<sub>3</sub>).

<sup>31</sup>P NMR (121 MHz, CDCl<sub>3</sub>) δ 28.82.

HRMS (ESI) *m/z*: [M+H]<sup>+</sup> Calcd for C<sub>28</sub>H<sub>28</sub>N<sub>4</sub>O<sub>3</sub>P 499.1894; Found 499.1895.

IR (ATR): 2977, 1569, 1250, 1118, 1026, 929, 731, 535 cm<sup>-1</sup>.

(4-(9-Isopropyl-9H-purin-6-yl)phenyl)bis(4-(trifluoromethoxy)phenyl)phosphine oxide (**4j**)

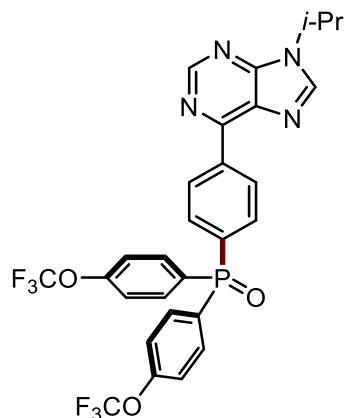

Prepared according to standard procedure B using  $[\text{RuCl}_3 \cdot 3\text{H}_2\text{O}]$  (10 mol %) on a 0.3 mmol scale, purification by column chromatography on silica gel (DCM/MeOH = 20/1,  $R_f = 0.47$ ) yielded **4j** (111.0 mg, 61%) as a colorless sticky oil.

$^1\text{H}$  NMR (300 MHz,  $\text{CDCl}_3$ )  $\delta$  9.02 (s, 1H), 8.88 (dd,  $J = 8.0, 1.7$  Hz, 2H), 8.19 (s, 1H), 7.87 – 7.70 (m, 6H), 7.32 (d,  $J = 8.1$  Hz, 4H), 4.98 (p,  $J = 6.8$  Hz, 1H), 1.66 (d,  $J = 6.8$  Hz, 6H).

$^{13}\text{C}$  NMR (75 MHz,  $\text{CDCl}_3$ )  $\delta$  153.0 ( $\text{C}_q$ ), 152.4 ( $\text{C}_q$ ), 152.2 ( $\text{C}_q$ ), 152.1 (CH), 142.6 (CH), 139.7 (d,  $J = 2.4$  Hz) ( $\text{C}_q$ ), 134.1 (d,  $J = 11.0$  Hz) (CH), 132.3 (d,  $J = 72.8$  Hz) ( $\text{C}_q$ ), 132.2 (d,  $J = 10.1$  Hz) (CH), 130.5 (d,  $J = 105.8$  Hz) ( $\text{C}_q$ ), 129.8 (d,  $J = 12.1$  Hz) (CH), 120.6 (d,  $J = 12.7$  Hz) (CH), 120.2 (q,  $J = 259.0$  Hz) ( $\text{C}_q$ ), 47.5 (CH), 22.5 ( $\text{CH}_3$ ).

$^{31}\text{P}$  NMR (121 MHz,  $\text{CDCl}_3$ )  $\delta$  26.78.

HRMS (ESI)  $m/z$ :  $[\text{M}+\text{H}]^+$  Calcd for  $\text{C}_{28}\text{H}_{22}\text{F}_6\text{N}_4\text{O}_3\text{P}$  607.1328; Found 607.1335.

IR (ATR): 2980, 1579, 1501, 1252, 1164, 1117, 748, 563  $\text{cm}^{-1}$ .

Bis(3,5-dimethylphenyl)(4-(9-isopropyl-9H-purin-6-yl)phenyl)phosphine oxide (**4k**)

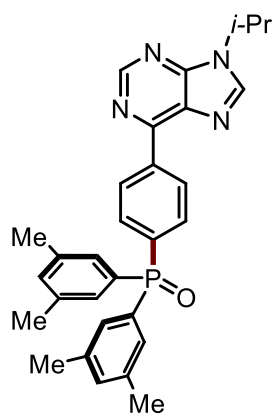

Prepared according to standard procedure B using  $[\text{RuCl}_3 \cdot 3\text{H}_2\text{O}]$  (10 mol %) on a 0.3 mmol scale, purification by column chromatography on silica gel (DCM/MeOH = 20/1,  $R_f = 0.51$ ) yielded **4k** (75.4 mg, 51%) as a colorless sticky oil.

$^1\text{H}$  NMR (300 MHz,  $\text{CDCl}_3$ )  $\delta$  9.02 (s, 1H), 8.83 (dd,  $J = 8.4, 2.5$  Hz, 2H), 8.18 (s, 1H), 7.86 (dd,  $J = 11.5, 8.4$  Hz, 2H), 7.30 (d,  $J = 12.3$  Hz, 4H), 7.15 (s, 2H), 4.97 (p,  $J = 6.8$  Hz, 1H), 2.30 (s, 12H), 1.66 (d,  $J = 6.8$  Hz, 6H).

$^{13}\text{C}$  NMR (75 MHz,  $\text{CDCl}_3$ )  $\delta$  153.5 ( $\text{C}_q$ ), 152.3 ( $\text{C}_q$ ), 152.0 (CH), 142.4 ( $\text{C}_q$ ), 138.8 (d,  $J = 2.8$  Hz) ( $\text{C}_q$ ), 138.1 (d,  $J = 12.8$  Hz) ( $\text{C}_q$ ), 135.3 (d,  $J = 101.7$  Hz) ( $\text{C}_q$ ), 133.7 (d,  $J = 2.8$  Hz) (CH), 132.4 (d,  $J = 10.0$

Hz) (CH), 132.1 (d,  $J = 103.5$  Hz) ( $C_q$ ), 131.7 ( $C_q$ ), 129.6 (d,  $J = 9.9$  Hz) (CH), 129.4 (d,  $J = 12.0$  Hz) (CH), 47.4 (CH), 22.5 ( $CH_3$ ), 21.2 ( $CH_3$ ).

$^{31}P$  NMR (121 MHz,  $CDCl_3$ )  $\delta$  29.43.

HRMS (ESI)  $m/z$ :  $[M+H]^+$  Calcd for  $C_{30}H_{32}N_4OP$  495.2308; Found 495.2314.

IR (ATR): 2977, 1575, 1326, 1182, 849, 730, 569, 530  $cm^{-1}$ .

(E)-4-(1-(Methoxyimino)ethyl)phenyl)diphenylphosphine oxide (**4l**)

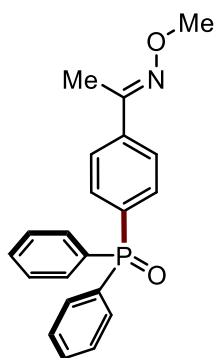

Prepared according to standard procedure A using  $[Ru(OAc)_2(p\text{-cymene})]$  (10 mol %) on a 0.3 mmol scale, purification by column chromatography on silica gel (DCM/MeOH = 20/1,  $R_f = 0.30$ ) yielded **4l** (31.8 mg, 30%) as a colorless sticky oil.

$^1H$  NMR (400 MHz,  $CDCl_3$ )  $\delta$  7.80 – 7.76 (m, 2H), 7.74 – 7.67 (m, 6H), 7.61 – 7.57 (m, 2H), 7.53 – 7.48 (m, 4H), 4.05 (s, 3H), 2.26 (s, 3H).

$^{13}C$  NMR (101 MHz,  $CDCl_3$ )  $\delta$  153.7 ( $C_q$ ), 140.0 (d,  $J = 2.9$  Hz) ( $C_q$ ), 132.9 (d,  $J = 103.9$  Hz) ( $C_q$ ), 132.3 (d,  $J = 104.6$  Hz) ( $C_q$ ), 132.2 (d,  $J = 9.8$  Hz) (CH), 132.1 (CH), 132.0 (CH), 128.5 (d,  $J = 12.0$  Hz) (CH), 126.0 (d,  $J = 12.4$  Hz) (CH), 62.2 ( $CH_3$ ), 12.5 ( $CH_3$ ).

$^{31}P$  NMR (162 MHz,  $CDCl_3$ )  $\delta$  28.87.

HRMS (ESI)  $m/z$ :  $[M+H]^+$  Calcd for  $C_{21}H_{21}NO_2P$  350.1304; Found 350.1310.

IR (ATR): 2935, 1436, 1181, 1118, 1046, 897, 709, 554  $cm^{-1}$ .

4-(1H-pyrazol-1-yl)phenyl)diphenylphosphine oxide (**4m**)

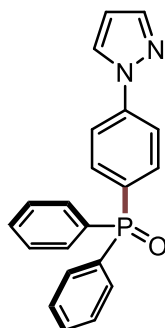

Prepared according to standard procedure B using  $[RuCl_3 \cdot 3H_2O]$  (10 mol %) on a 0.3 mmol scale, purification by column chromatography on silica gel (DCM/MeOH = 20/1,  $R_f = 0.53$ ) yielded **4m** (33.0 mg, 32%) as a colorless sticky oil.

$^1H$  NMR (300 MHz,  $CDCl_3$ )  $\delta$  7.98 (d,  $J = 2.5$  Hz, 1H), 7.84 – 7.64 (m, 9H), 7.58 – 7.52 (m, 2H), 7.50

– 7.44 (m, 4H), 6.49 (dd,  $J = 2.5, 1.9$  Hz, 1H).

$^{13}\text{C}$  NMR (75 MHz,  $\text{CDCl}_3$ )  $\delta$  142.6 (d,  $J = 3.1$  Hz) ( $\text{C}_q$ ), 141.9 (CH), 133.6 (d,  $J = 10.7$  Hz) (CH), 132.3 (d,  $J = 104.8$  Hz) ( $\text{C}_q$ ), 132.1 (d,  $J = 3.7$  Hz) (CH), 132.0 (CH), 130.1 (d,  $J = 106.0$  Hz) ( $\text{C}_q$ ), 128.6 (d,  $J = 12.2$  Hz) (CH), 126.8 (CH), 118.6 (d,  $J = 12.6$  Hz) (CH), 108.4 (CH).

$^{31}\text{P}$  NMR (121 MHz,  $\text{CDCl}_3$ )  $\delta$  28.52.

HRMS (ESI)  $m/z$ :  $[\text{M}+\text{H}]^+$  Calcd for  $\text{C}_{21}\text{H}_{18}\text{N}_2\text{OP}$  345.1151; Found 345.1156.

IR (ATR): 3059, 1600, 1392, 1177, 1111, 933, 726, 548  $\text{cm}^{-1}$ .

(4-(4,4-Dimethyl-4,5-dihydrooxazol-2-yl)phenyl)diphenylphosphine oxide (**4n**)

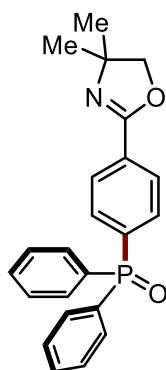

Prepared according to standard procedure B using  $[\text{RuCl}_3 \cdot 3\text{H}_2\text{O}]$  (10 mol %) on a 0.3 mmol scale, purification by column chromatography on silica gel ( $\text{DCM}/\text{MeOH} = 20/1$ ,  $R_f = 0.49$ ) yielded **4n** (25.3 mg, 22%) as a colorless sticky oil.

$^1\text{H}$  NMR (500 MHz,  $\text{CDCl}_3$ )  $\delta$  8.04 – 8.00 (m, 2H), 7.74 – 7.69 (m, 2H), 7.68 – 7.63 (m, 4H), 7.57 – 7.53 (m, 2H), 7.48 – 7.44 (m, 4H), 4.12 (s, 2H), 1.38 (s, 6H).

$^{13}\text{C}$  NMR (126 MHz,  $\text{CDCl}_3$ )  $\delta$  161.2 ( $\text{C}_q$ ), 135.5 (d,  $J = 102.3$  Hz) ( $\text{C}_q$ ), 132.1 (d,  $J = 104.6$  Hz) ( $\text{C}_q$ ), 132.1 (CH), 132.0 (CH), 132.1 (CH), 131.4 (d,  $J = 2.8$  Hz) ( $\text{C}_q$ ), 128.6 (d,  $J = 12.3$  Hz) (CH), 128.1 (d,  $J = 12.2$  Hz) (CH), 79.3 ( $\text{CH}_2$ ), 67.9 ( $\text{C}_q$ ), 28.3 ( $\text{CH}_3$ ).

$^{31}\text{P}$  NMR (121 MHz,  $\text{CDCl}_3$ )  $\delta$  28.57.

HRMS (ESI)  $m/z$ :  $[\text{M}+\text{H}]^+$  Calcd for  $\text{C}_{23}\text{H}_{23}\text{NO}_2\text{P}$  376.1461; Found 376.1469.

IR (ATR): 2965, 1649, 1437, 1197, 1118, 1063, 721, 547  $\text{cm}^{-1}$ .

Diphenyl(4-(pyridin-2-yl)phenyl)phosphine oxide (**4o**)

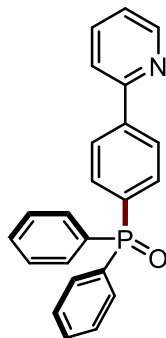

Prepared according to standard procedure B using  $[\text{RuCl}_3 \cdot 3\text{H}_2\text{O}]$  (10 mol %) on a 0.3 mmol scale,

purification by column chromatography on silica gel (DCM/MeOH = 20/1,  $R_f$  = 0.56) yielded **4o** (47.8 mg, 45%) as a colorless sticky oil.

$^1\text{H}$  NMR (300 MHz,  $\text{CDCl}_3$ )  $\delta$  8.71 (d,  $J$  = 4.6 Hz, 1H), 8.08 (dd,  $J$  = 8.4, 2.5 Hz, 2H), 7.82 – 7.67 (m, 8H), 7.58 – 7.53 (m, 2H), 7.50 – 7.44 (m, 4H), 7.31 – 7.26 (m, 1H).

$^{13}\text{C}$  NMR (101 MHz,  $\text{CDCl}_3$ )  $\delta$  156.2 ( $\text{C}_q$ ), 149.9 (CH), 142.8 (d,  $J$  = 2.8 Hz) ( $\text{C}_q$ ), 136.9 (CH), 132.8 (d,  $J$  = 104.2 Hz) ( $\text{C}_q$ ), 132.6 (d,  $J$  = 10.1 Hz) (CH), 132.4 (d,  $J$  = 104.3 Hz) ( $\text{C}_q$ ), 132.1 (d,  $J$  = 10.0 Hz) (CH), 132.0 (d,  $J$  = 2.7 Hz) (CH), 128.5 (d,  $J$  = 12.2 Hz) (CH), 126.9 (d,  $J$  = 12.3 Hz) (CH), 122.9 (CH), 121.0 (CH).

$^{31}\text{P}$  NMR (121 MHz,  $\text{CDCl}_3$ )  $\delta$  28.98.

HRMS (ESI)  $m/z$ :  $[\text{M}+\text{H}]^+$  Calcd for  $\text{C}_{23}\text{H}_{19}\text{NOP}$  356.1199; Found 356.1203.

IR (ATR): 3055, 1586, 1436, 1182, 1119, 779, 705, 553  $\text{cm}^{-1}$ .

(4-(5-Methylpyrimidin-2-yl)phenyl)diphenylphosphine oxide (**4p**)

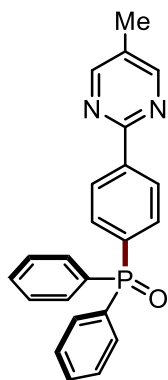

Prepared according to standard procedure B using  $[\text{RuCl}_3 \cdot 3\text{H}_2\text{O}]$  (10 mol %) on a 0.3 mmol scale, purification by column chromatography on silica gel (DCM/MeOH = 20/1,  $R_f$  = 0.31) yielded **4p** (50.9 mg, 46%) as a colorless solid. M.p.: 217-218  $^\circ\text{C}$

$^1\text{H}$  NMR (300 MHz,  $\text{CDCl}_3$ )  $\delta$  8.68 – 8.58 (m, 2H), 8.51 – 8.45 (m, 2H), 7.82 – 7.74 (m, 2H), 7.73 – 7.65 (m, 4H), 7.57 – 7.50 (m, 2H), 7.48 – 7.42 (m, 4H), 2.33 (s, 3H).

$^{13}\text{C}$  NMR (75 MHz,  $\text{CDCl}_3$ )  $\delta$  161.4 (d,  $J$  = 1.0 Hz) ( $\text{C}_q$ ), 157.4 (CH), 140.9 (d,  $J$  = 2.9 Hz) ( $\text{C}_q$ ), 134.2 (d,  $J$  = 103.4 Hz) ( $\text{C}_q$ ), 132.3 (d,  $J$  = 10.1 Hz) (CH), 132.4 (d,  $J$  = 104.3 Hz) ( $\text{C}_q$ ), 132.0 (d,  $J$  = 10.0 Hz) (CH), 131.9 (CH), 129.1 ( $\text{C}_q$ ), 128.5 (d,  $J$  = 12.2 Hz) (CH), 127.7 (d,  $J$  = 12.3 Hz) (CH), 15.5 ( $\text{CH}_3$ ).

$^{31}\text{P}$  NMR (121 MHz,  $\text{CDCl}_3$ )  $\delta$  28.94.

HRMS (ESI)  $m/z$ :  $[\text{M}+\text{H}]^+$  Calcd for  $\text{C}_{23}\text{H}_{20}\text{N}_2\text{OP}$  371.1308; Found 371.1311.

IR (ATR): 3058, 1542, 1429, 1195, 1118, 791, 730, 545  $\text{cm}^{-1}$ .

(4-(2-Methyl-2H-tetrazol-5-yl)phenyl)diphenylphosphine oxide (**4q**)

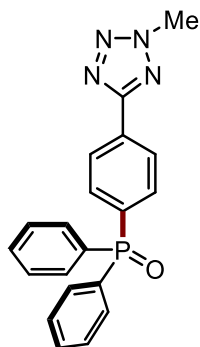

Prepared according to standard procedure B using  $[\text{RuCl}_3 \cdot 3\text{H}_2\text{O}]$  (10 mol %) on a 0.3 mmol scale, purification by column chromatography on silica gel (DCM/MeOH = 20/1,  $R_f = 0.51$ ) yielded **4q** (38.9 mg, 36%) as a colorless solid. 175-176 °C

$^1\text{H}$  NMR (400 MHz,  $\text{CDCl}_3$ )  $\delta$  8.27 – 8.20 (m, 2H), 7.83 – 7.77 (m, 2H), 7.72 – 7.66 (m, 4H), 7.59 – 7.54 (m, 2H), 7.51 – 7.45 (m, 4H), 4.41 (s, 3H).

$^{13}\text{C}$  NMR (101 MHz,  $\text{CDCl}_3$ )  $\delta$  164.3 ( $\text{C}_q$ ), 134.7 (d,  $J = 103.1$  Hz) ( $\text{C}_q$ ), 132.7 (d,  $J = 10.0$  Hz) (CH), 132.1 (CH), 132.1 (d,  $J = 9.9$  Hz) (CH), 131.1 (d,  $J = 99.6$  Hz) ( $\text{C}_q$ ), 130.6 ( $\text{C}_q$ ), 128.6 (d,  $J = 12.2$  Hz) (CH), 126.7 (d,  $J = 12.2$  Hz) (CH), 39.6 ( $\text{CH}_3$ ).

$^{31}\text{P}$  NMR (162 MHz,  $\text{CDCl}_3$ )  $\delta$  28.61.

HRMS (ESI)  $m/z$ :  $[\text{M}+\text{H}]^+$  Calcd for  $\text{C}_{20}\text{H}_{18}\text{N}_4\text{OP}$  361.1213; Found 361.1218.

IR (ATR): 3058, 1437, 1196, 1113, 1003, 844, 727, 562  $\text{cm}^{-1}$ .

(4-(9-((3aR,4R,6R,6aR)-6-(Hydroxymethyl)-2,2-dimethyltetrahydrofuro[3,4-d][1,3]dioxol-4-yl)-9H-purin-6-yl)phenyl)diphenylphosphine oxide (**4r**)

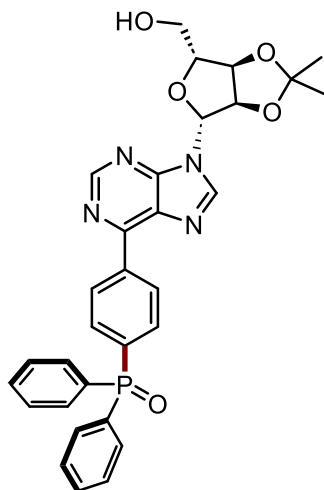

Prepared according to standard procedure B using  $[\text{RuCl}_3 \cdot 3\text{H}_2\text{O}]$  (10 mol %) on a 0.3 mmol scale, purification by column chromatography on silica gel (DCM/MeOH = 20/1,  $R_f = 0.40$ ) yielded **4r** (47.6 mg, 28%) as a colorless sticky oil.

$^1\text{H}$  NMR (300 MHz,  $\text{CDCl}_3$ )  $\delta$  8.99 (s, 1H), 8.83 (dd,  $J = 8.4, 2.5$  Hz, 2H), 8.25 (s, 1H), 7.86 (dd,  $J = 11.6, 8.4$  Hz, 2H), 7.73 – 7.66 (m, 4H), 7.58 – 7.52 (m, 2H), 7.50 – 7.44 (m, 4H), 6.02 (d,  $J = 4.6$  Hz, 1H), 5.63 (d,  $J = 8.3$  Hz, 1H), 5.30 – 5.23 (m, 1H), 5.13 (dd,  $J = 6.0, 1.2$  Hz, 1H), 4.58 – 4.53 (m, 1H), 3.98 (dd,  $J = 12.6, 1.4$  Hz, 1H), 3.88 – 3.77 (m, 1H), 1.66 (s, 3H), 1.38 (s, 3H).

$^{13}\text{C}$  NMR (75 MHz,  $\text{CDCl}_3$ )  $\delta$  154.5 (d,  $J = 1.0$  Hz) ( $\text{C}_q$ ), 151.8 (CH), 151.4 ( $\text{C}_q$ ), 144.4 (CH), 138.4 (d,

$J = 2.9$  Hz) (C<sub>q</sub>), 135.3 (d,  $J = 102.3$  Hz) (C<sub>q</sub>), 132.9 (C<sub>q</sub>), 132.4 (d,  $J = 10.0$  Hz) (CH), 132.1 (d,  $J = 3.9$  Hz) (CH), 132.1 (d,  $J = 104.5$  Hz) (C<sub>q</sub>), 132.0 (d,  $J = 3.3$  Hz) (CH), 129.7 (d,  $J = 12.0$  Hz) (CH), 128.6 (d,  $J = 12.2$  Hz) (CH), 114.2 (C<sub>q</sub>), 93.9 (CH), 86.3 (CH), 83.1 (CH), 81.6 (CH), 63.2 (CH<sub>2</sub>), 27.6 (CH<sub>3</sub>), 25.2 (CH<sub>3</sub>).

<sup>31</sup>P NMR (121 MHz, CDCl<sub>3</sub>)  $\delta$  28.98.

HRMS (ESI)  $m/z$ : [M+H]<sup>+</sup> Calcd for C<sub>31</sub>H<sub>30</sub>N<sub>4</sub>O<sub>5</sub>P 569.1948; Found 569.1959.

IR (ATR): 2938, 1581, 1437, 1173, 1083, 848, 718, 532 cm<sup>-1</sup>.



## 9. NMR Spectroscopic Data

### (2-(9-Isopropyl-9H-purin-6-yl)phenyl)diphenylphosphine oxide (**3a**)

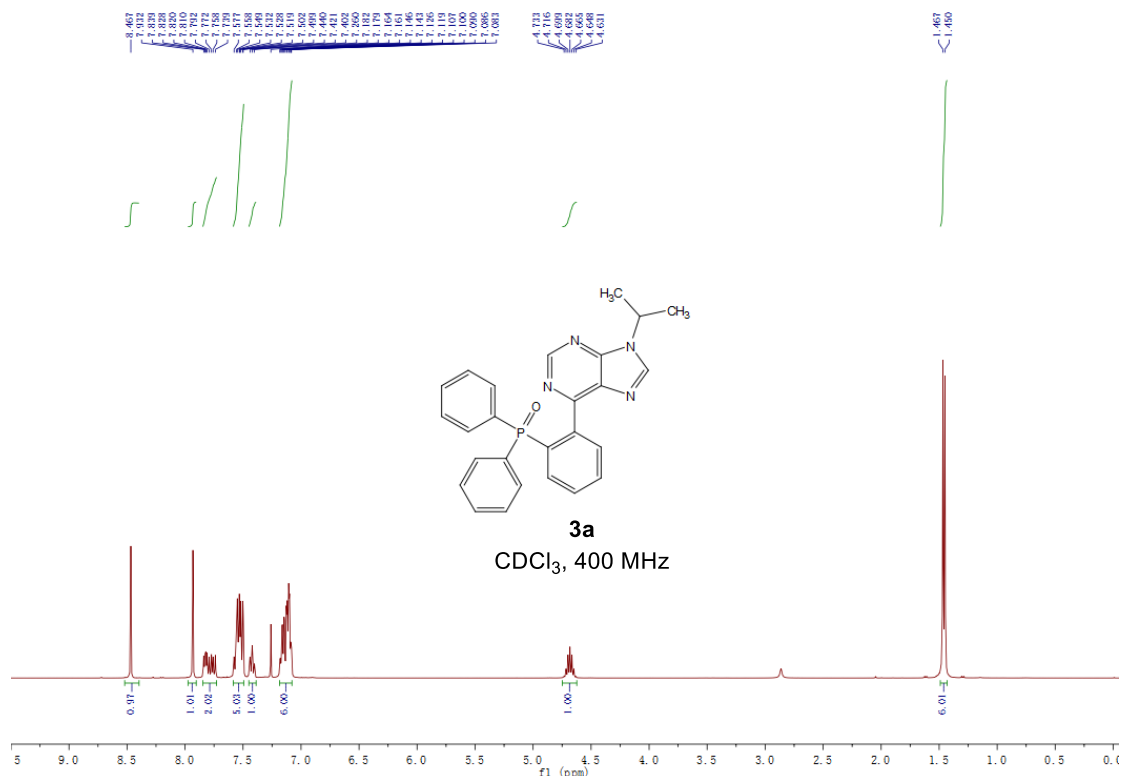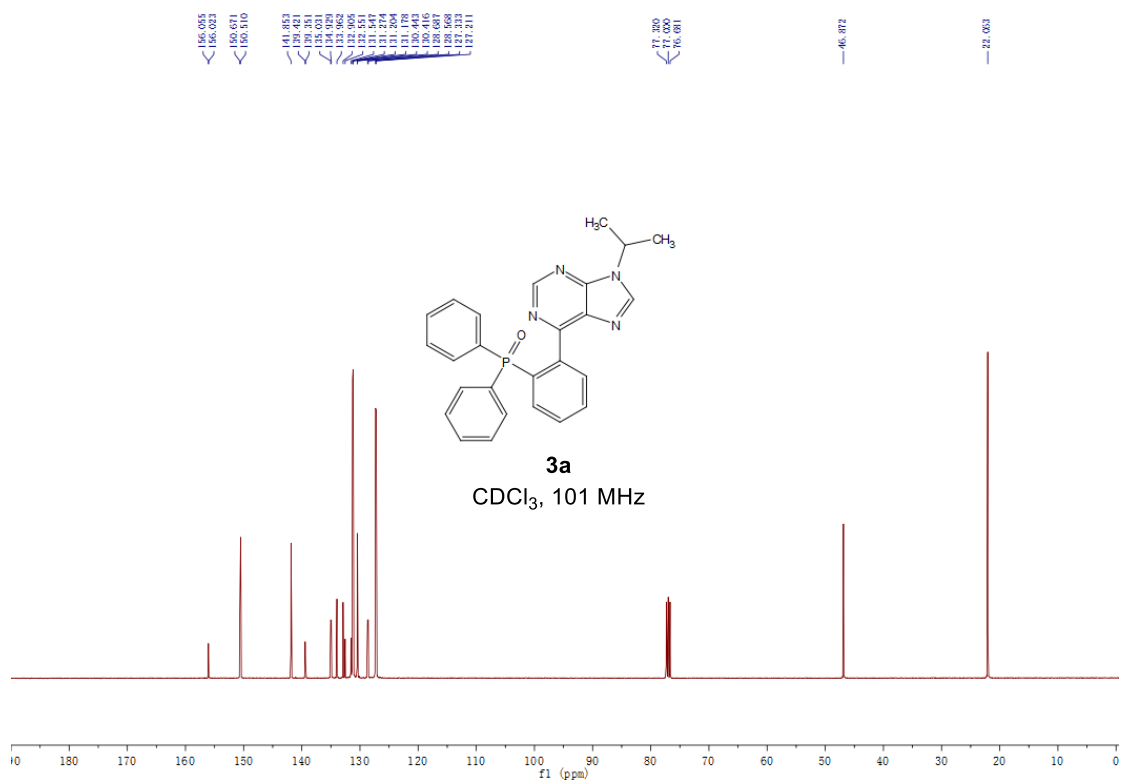

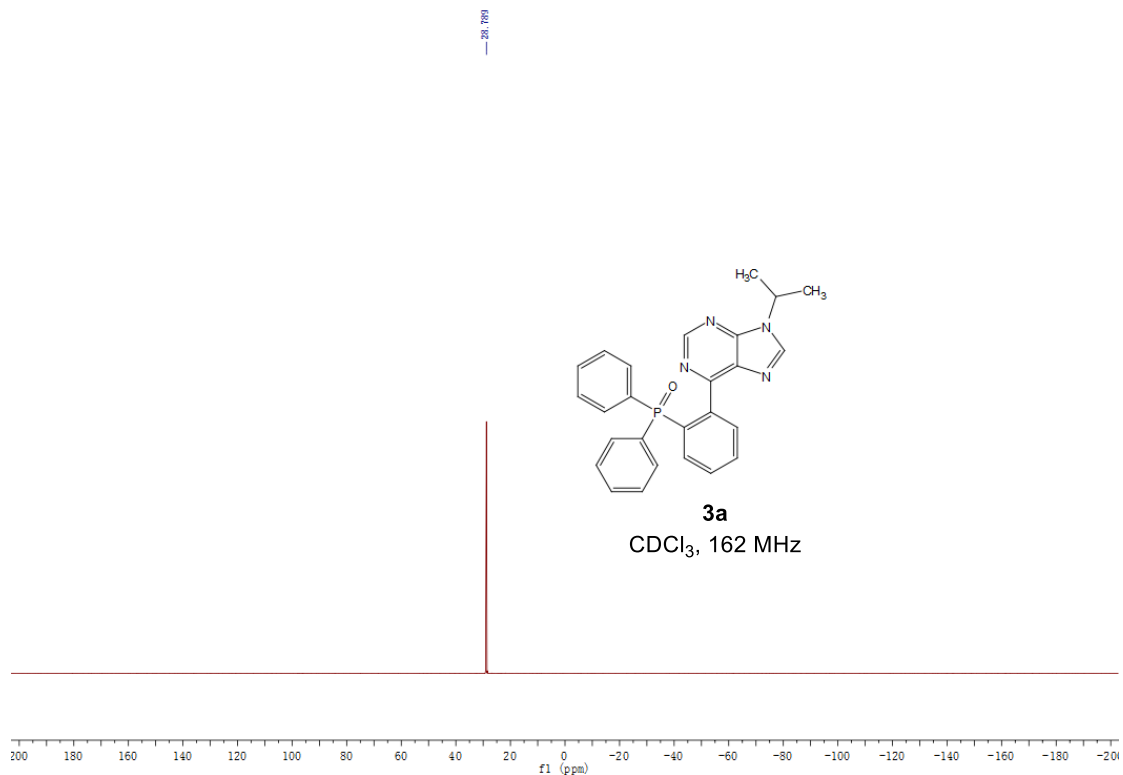

(2-(9-Methyl-9H-purin-6-yl)phenyl)diphenylphosphine oxide (**3b**)

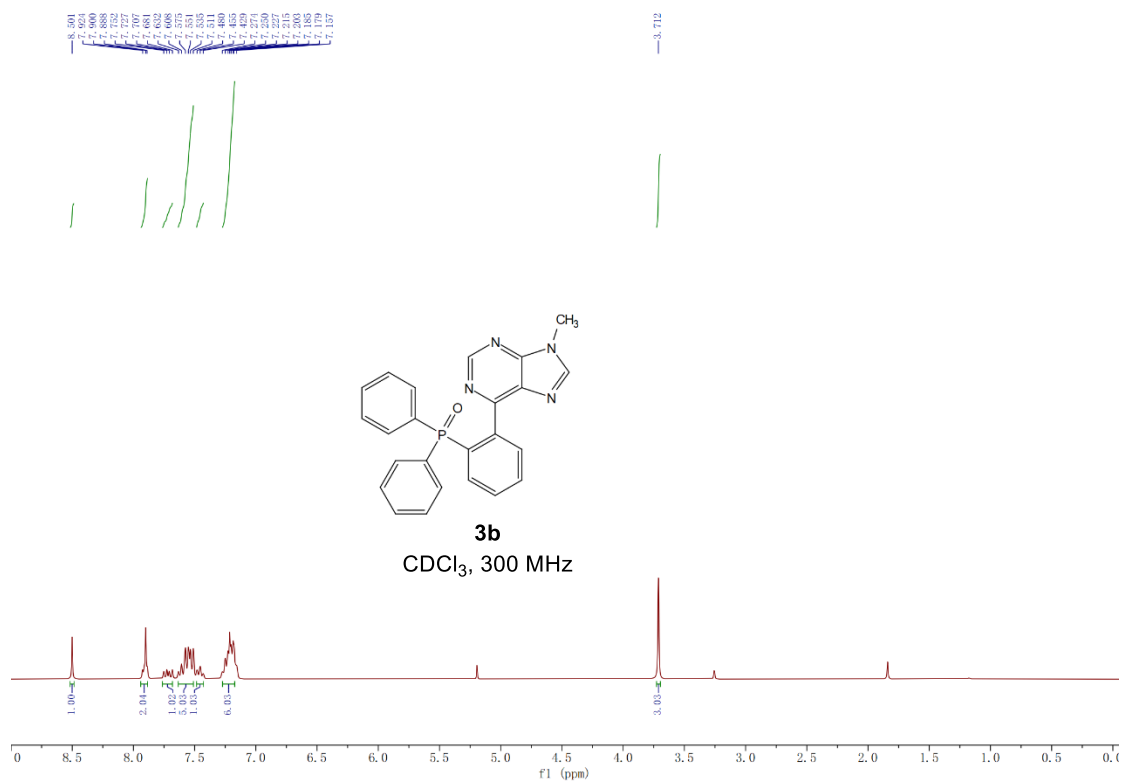

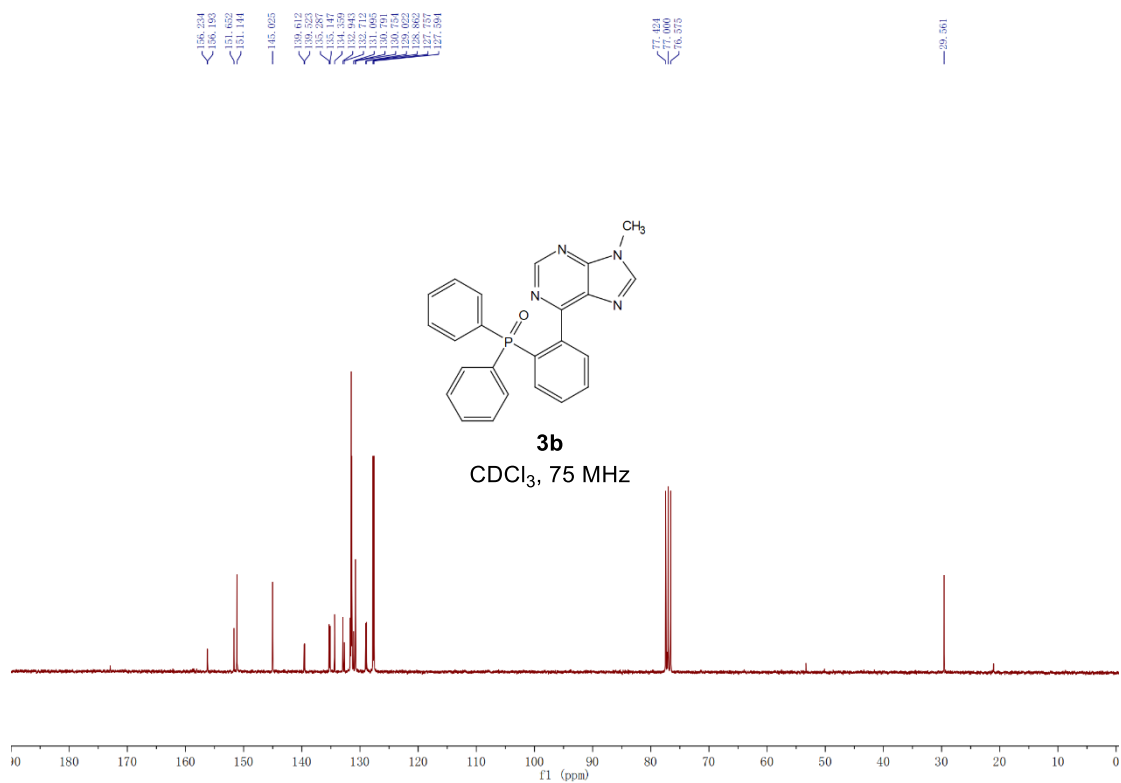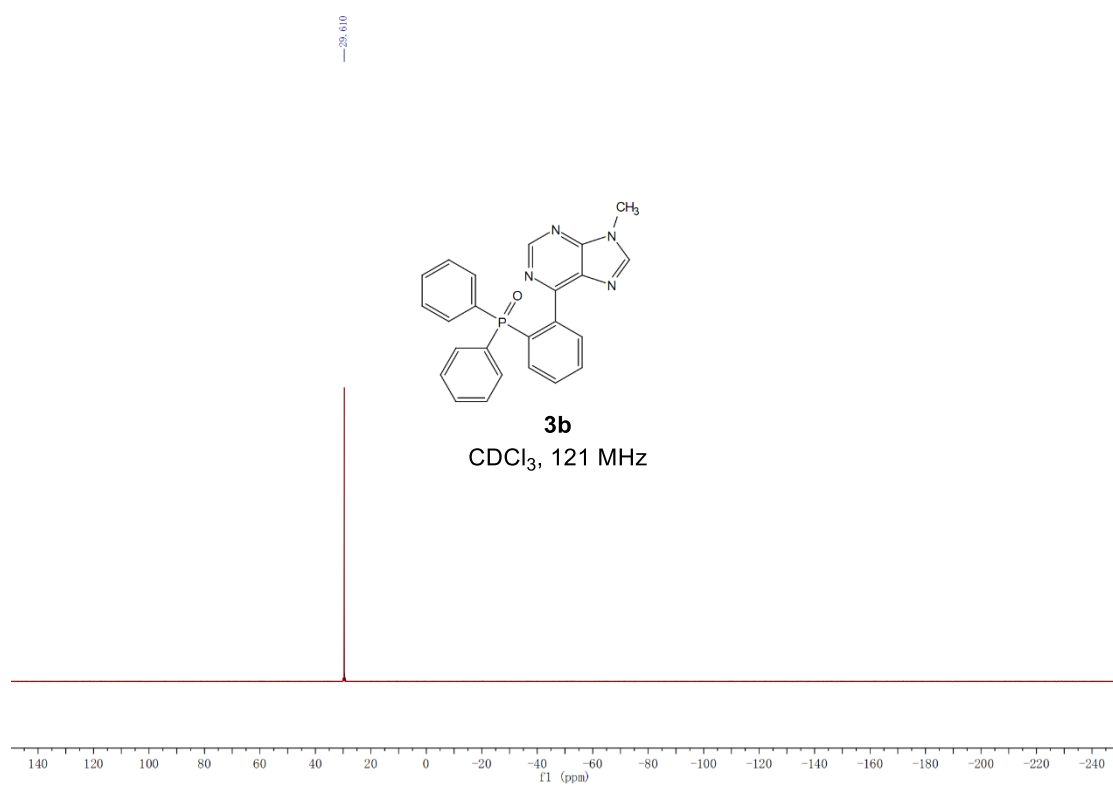

(2-(9-Benzyl-9H-purin-6-yl)phenyl)diphenylphosphine oxide (**3c**)

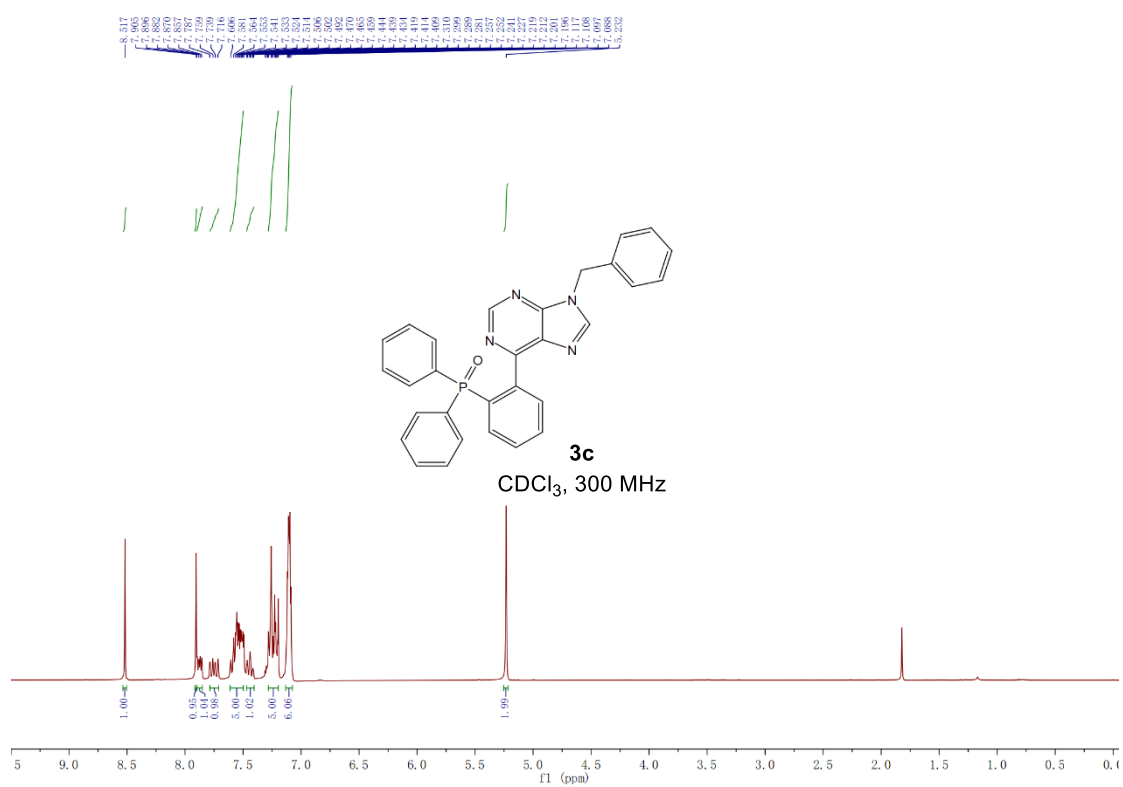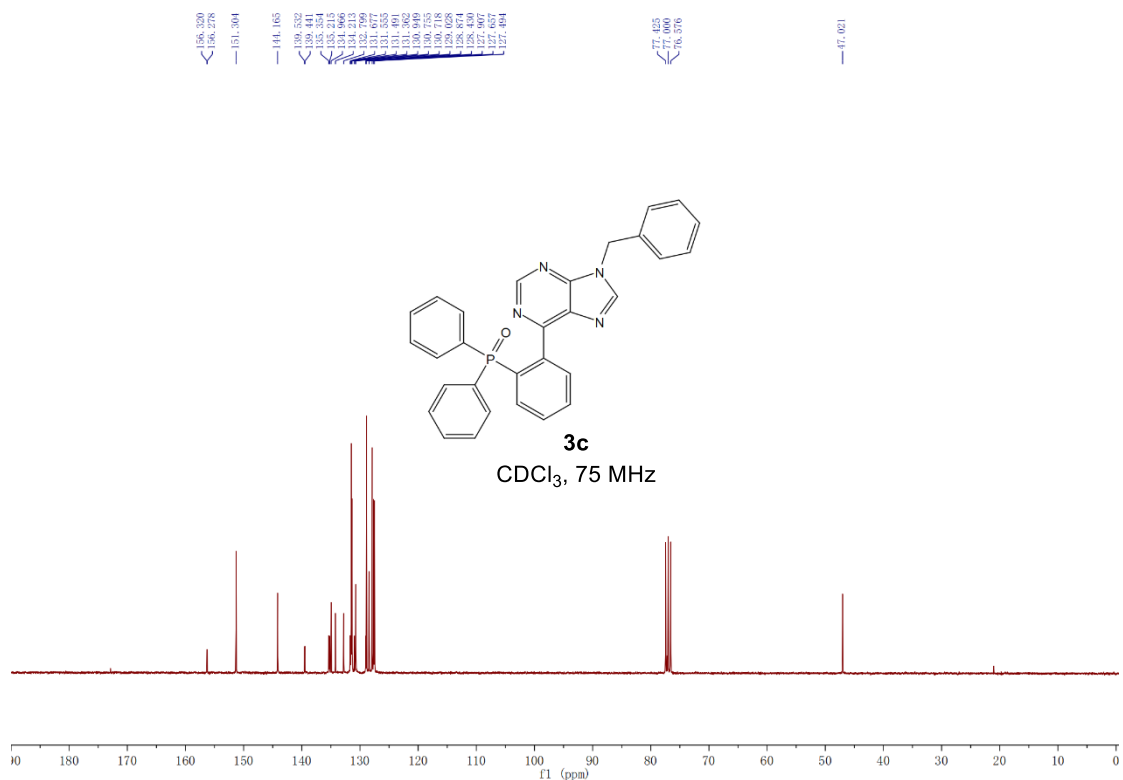

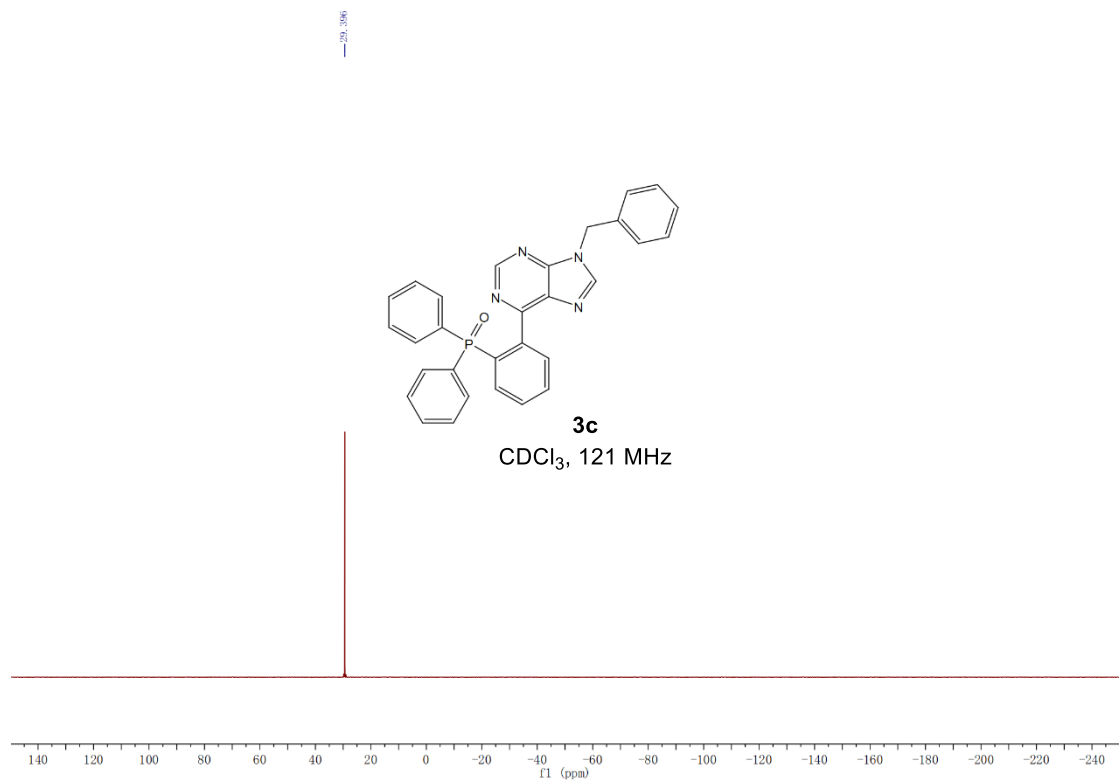

(2R,3R,4R,5R)-2-(Acetoxymethyl)-5-(6-(2-(diphenylphosphoryl)phenyl)-9H-purin-9-yl)tetrahydrofuran-3,4-diyl diacetate (**3d**)

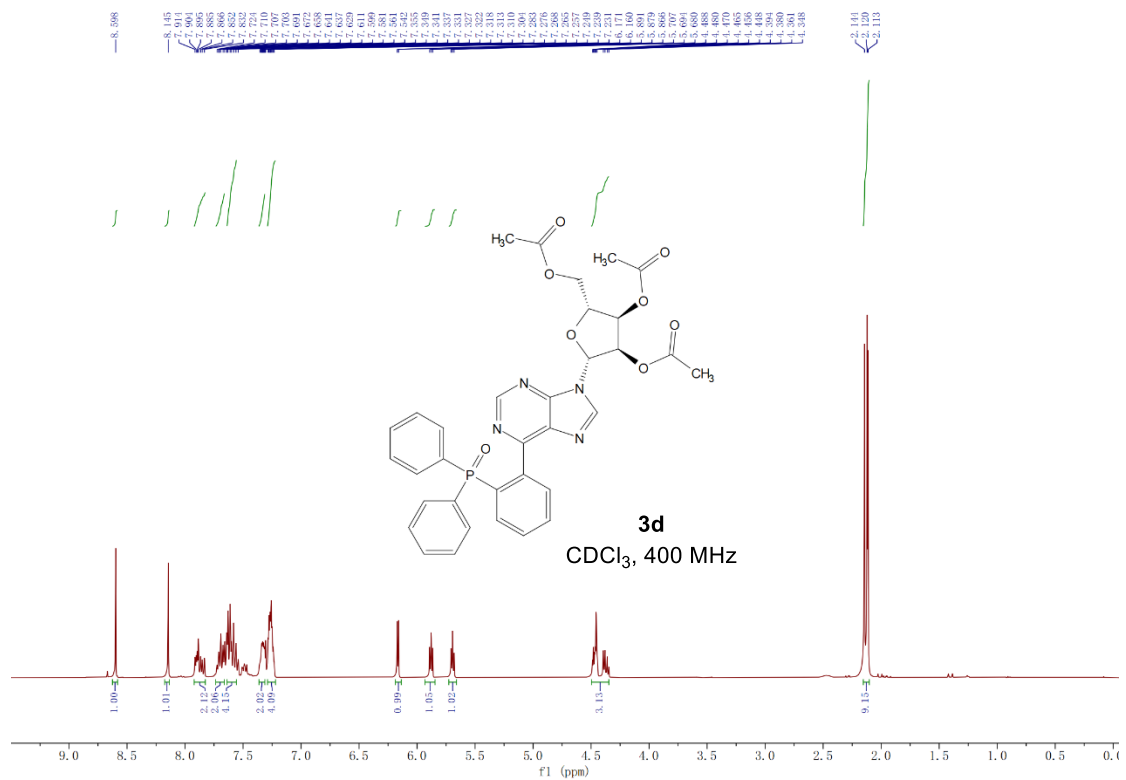

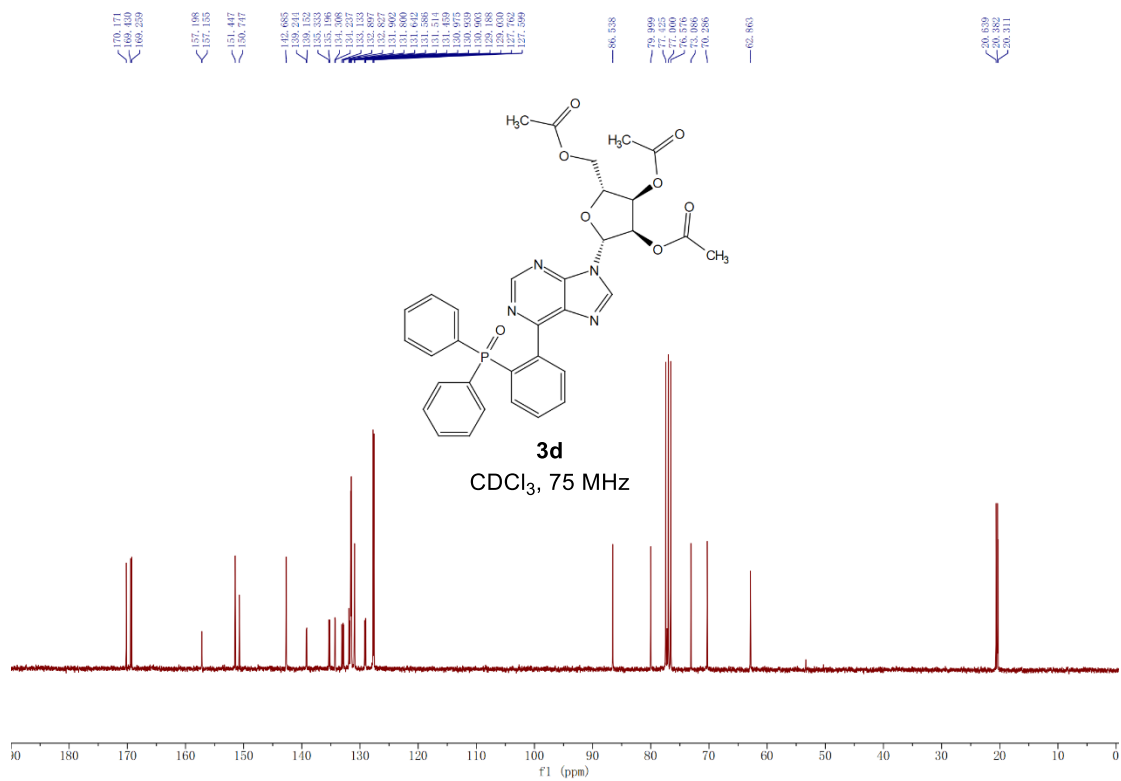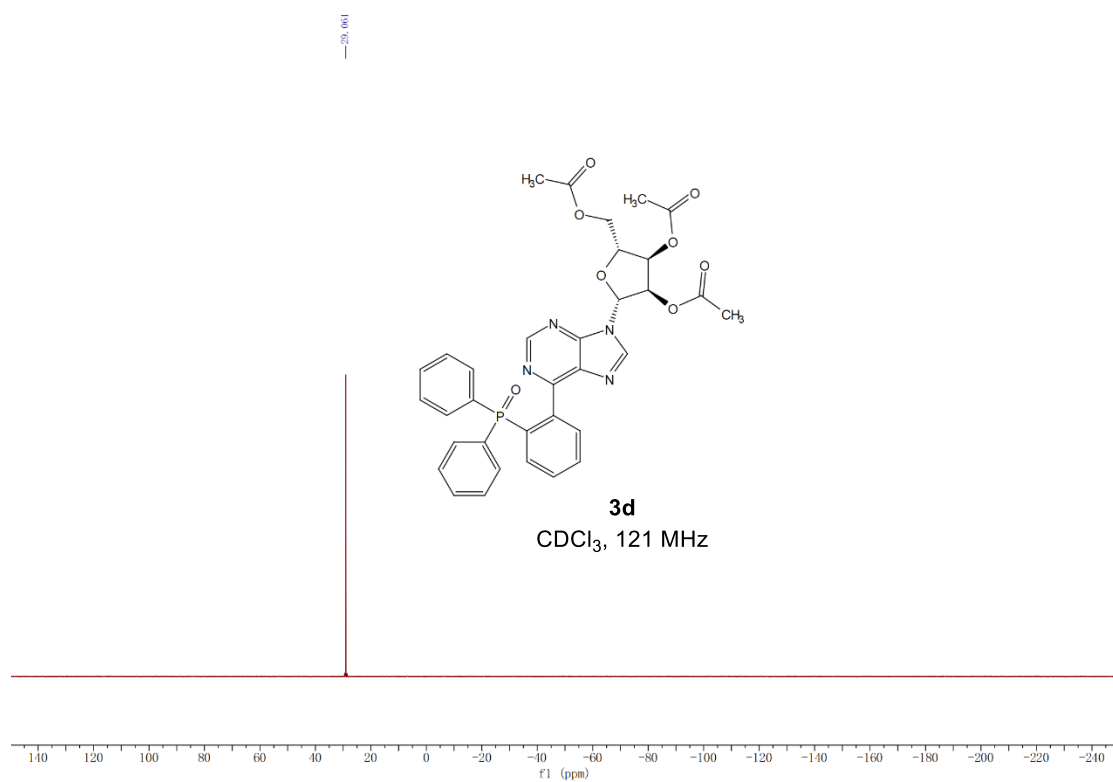

(4-Fluoro-2-(9-isopropyl-9H-purin-6-yl)phenyl)diphenylphosphine oxide (**3e**)

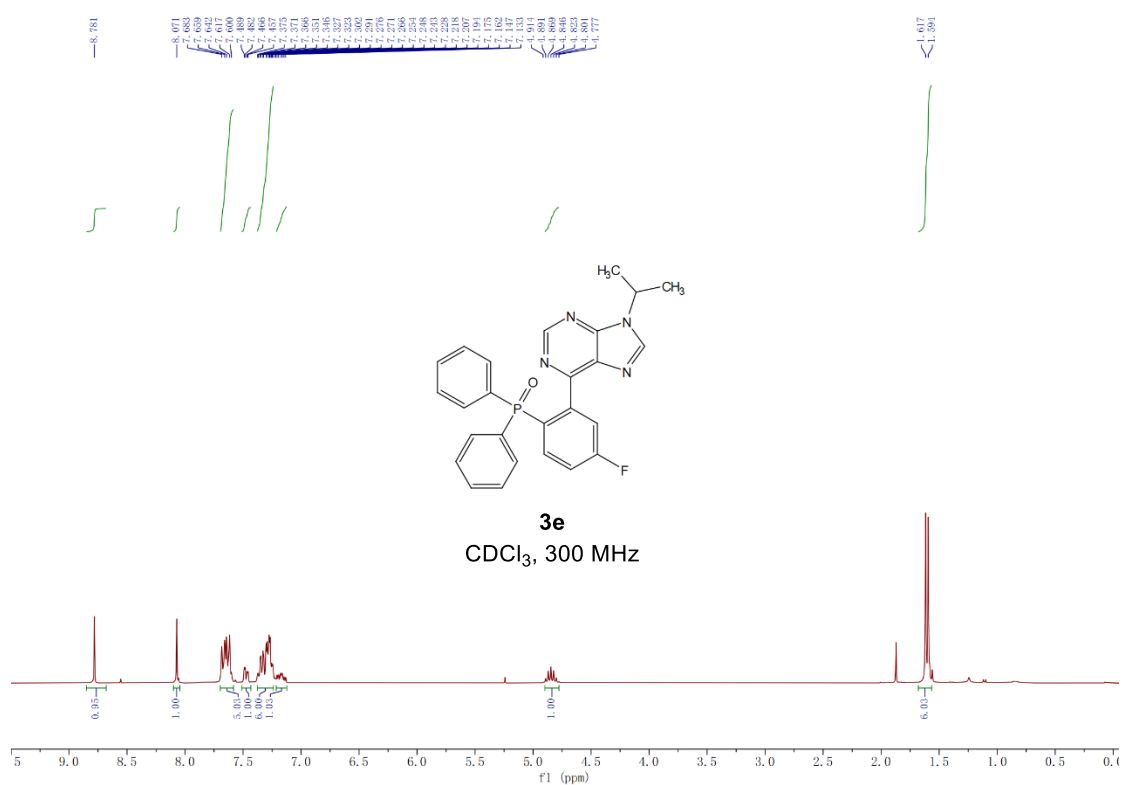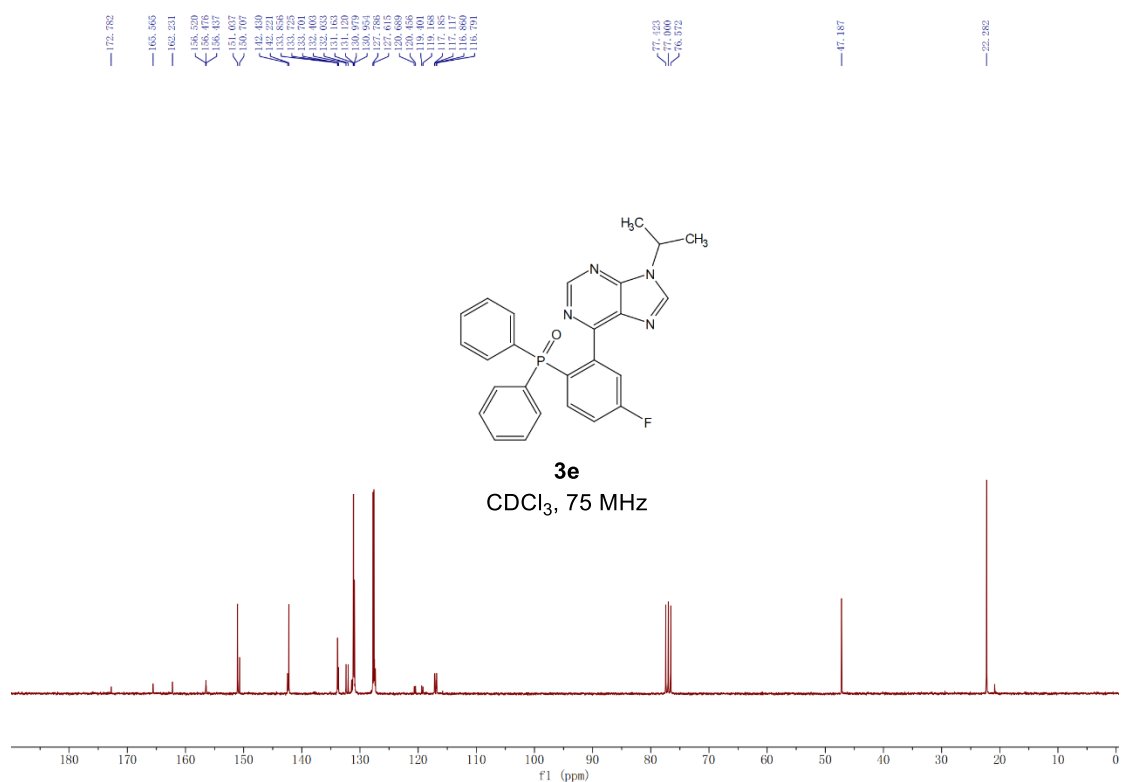

23.850

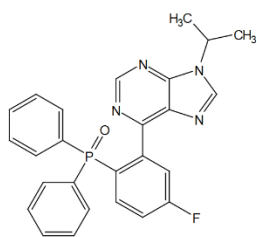

**3e**

CDCl<sub>3</sub>, 121 MHz

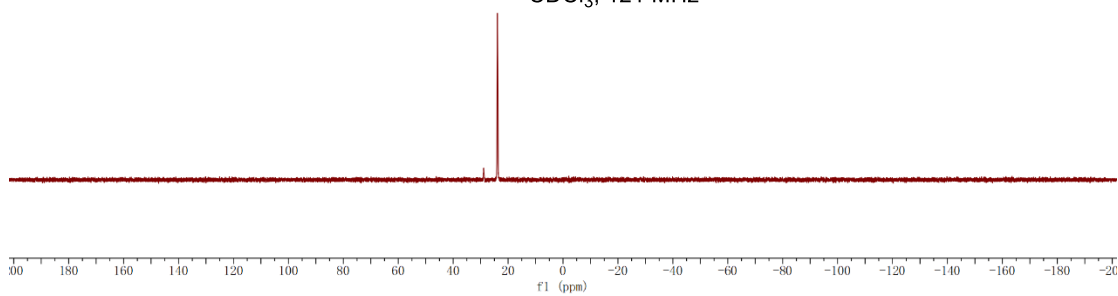

114.703

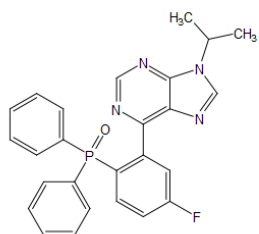

**3e**

CDCl<sub>3</sub>, 282 MHz

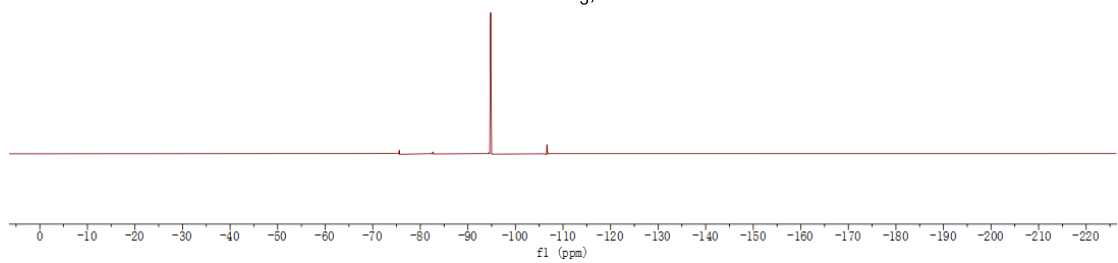



(2-(9-Isopropyl-9H-purin-6-yl)-4-methylphenyl)diphenylphosphine oxide (**3f**)

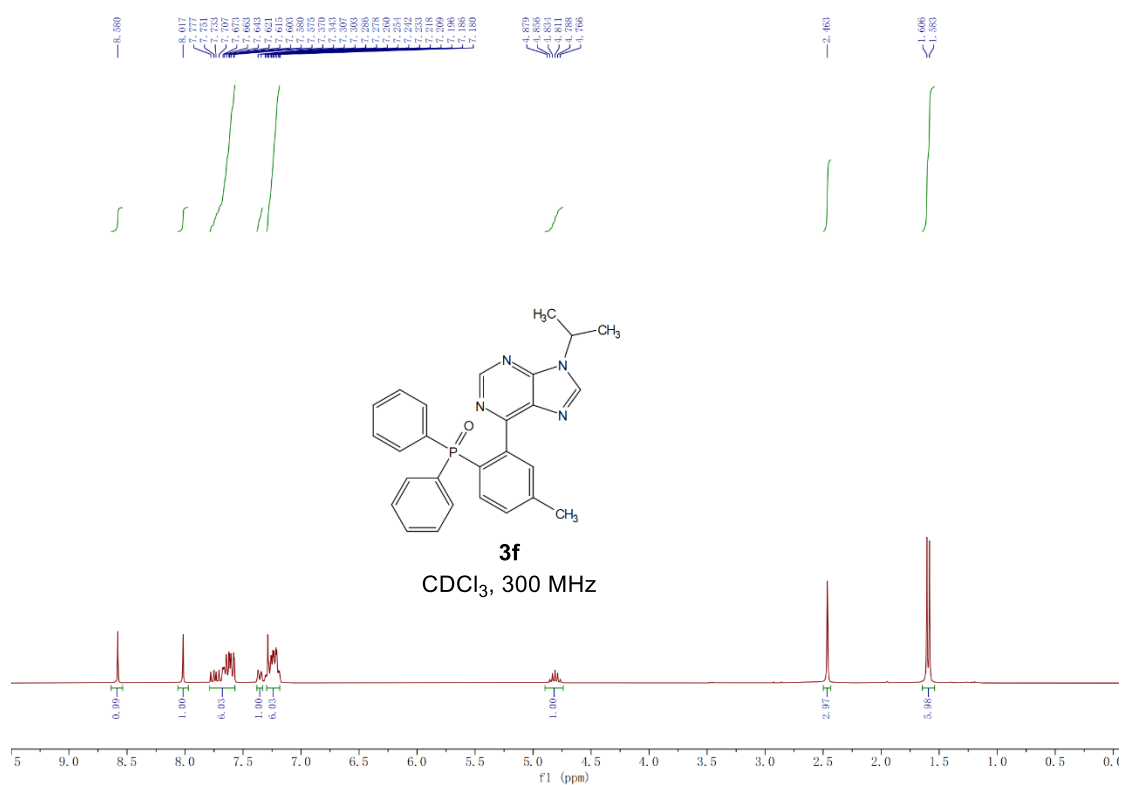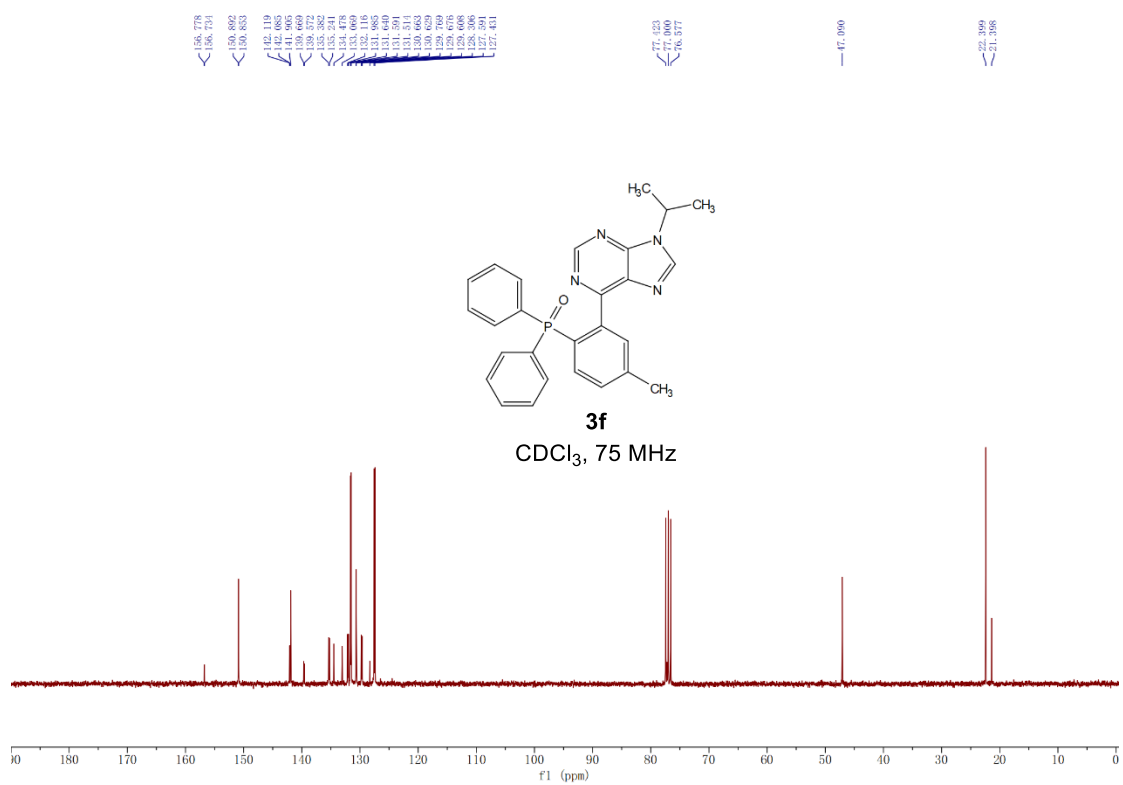

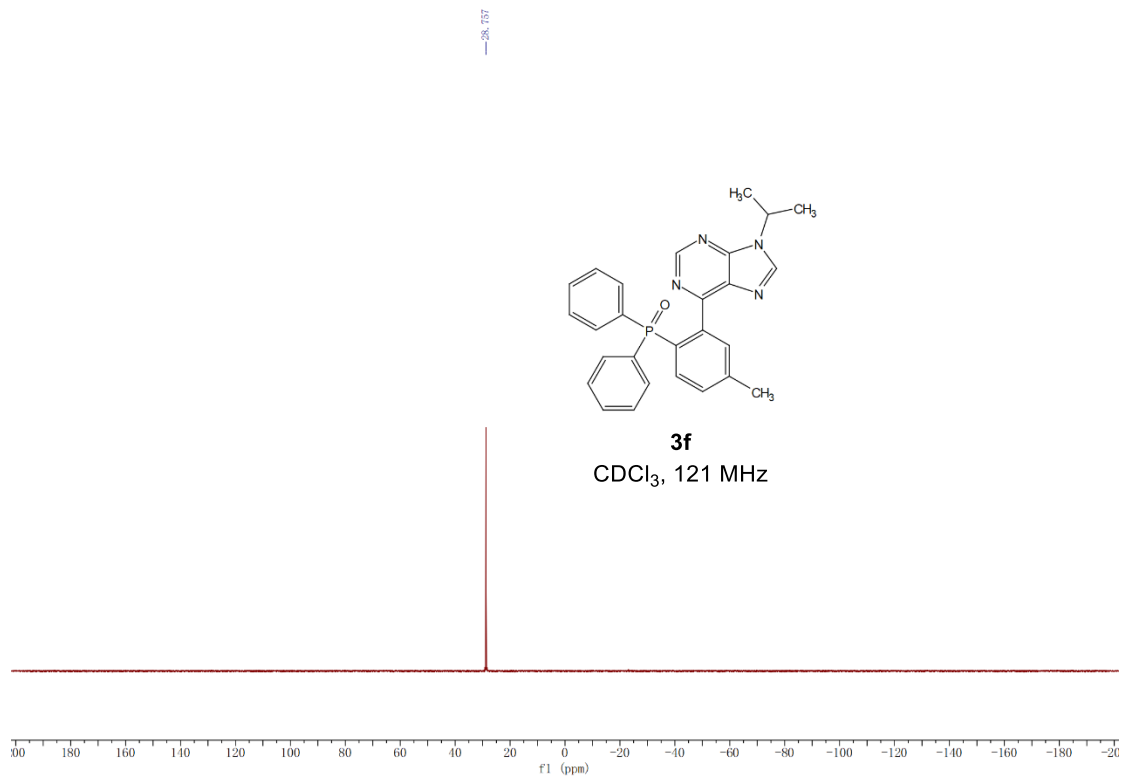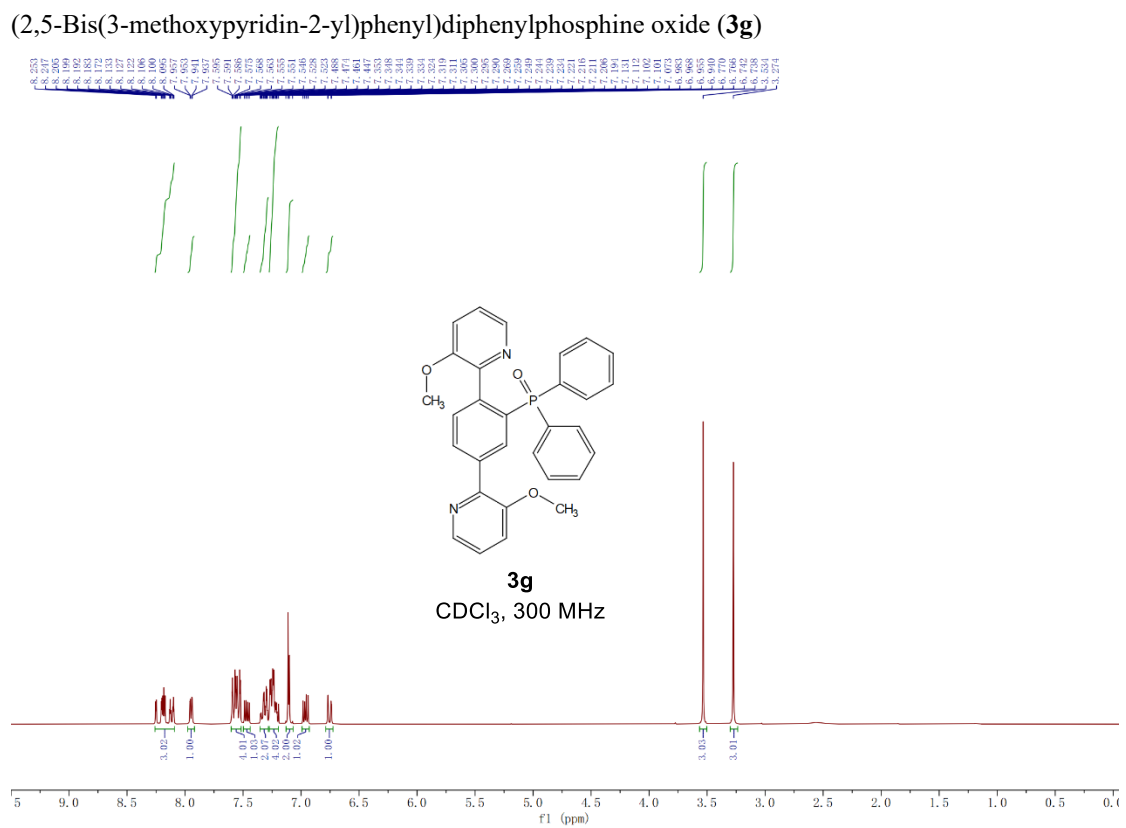

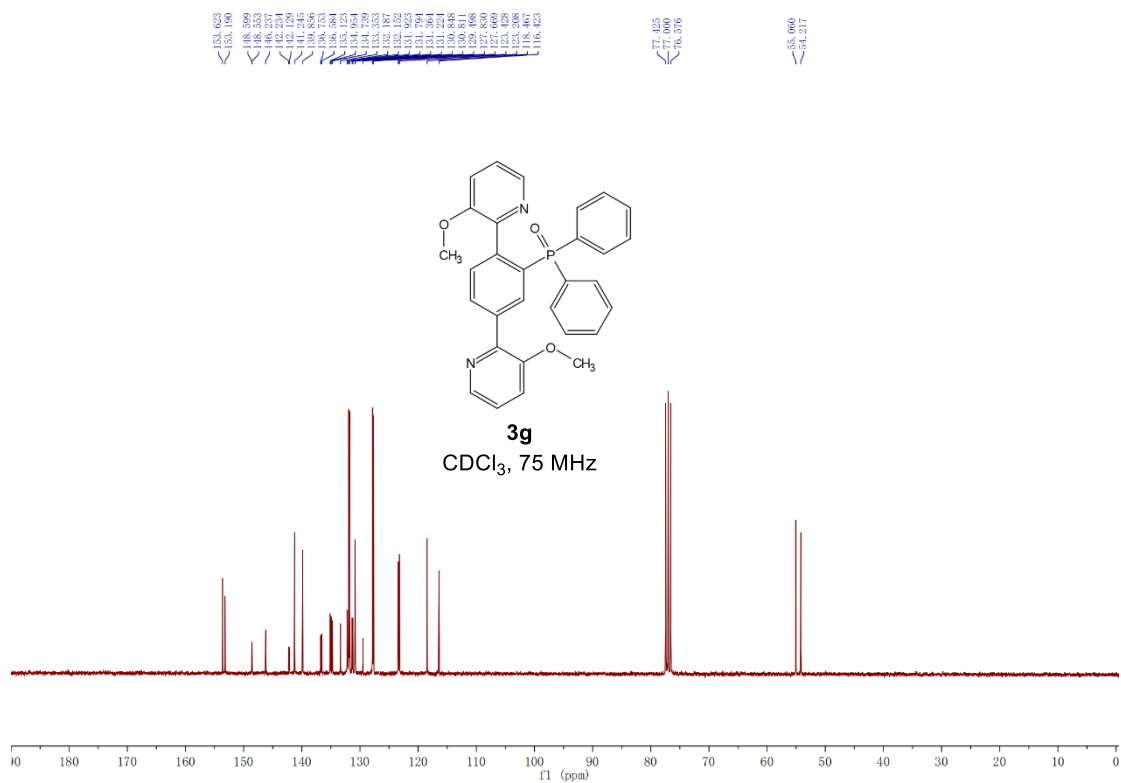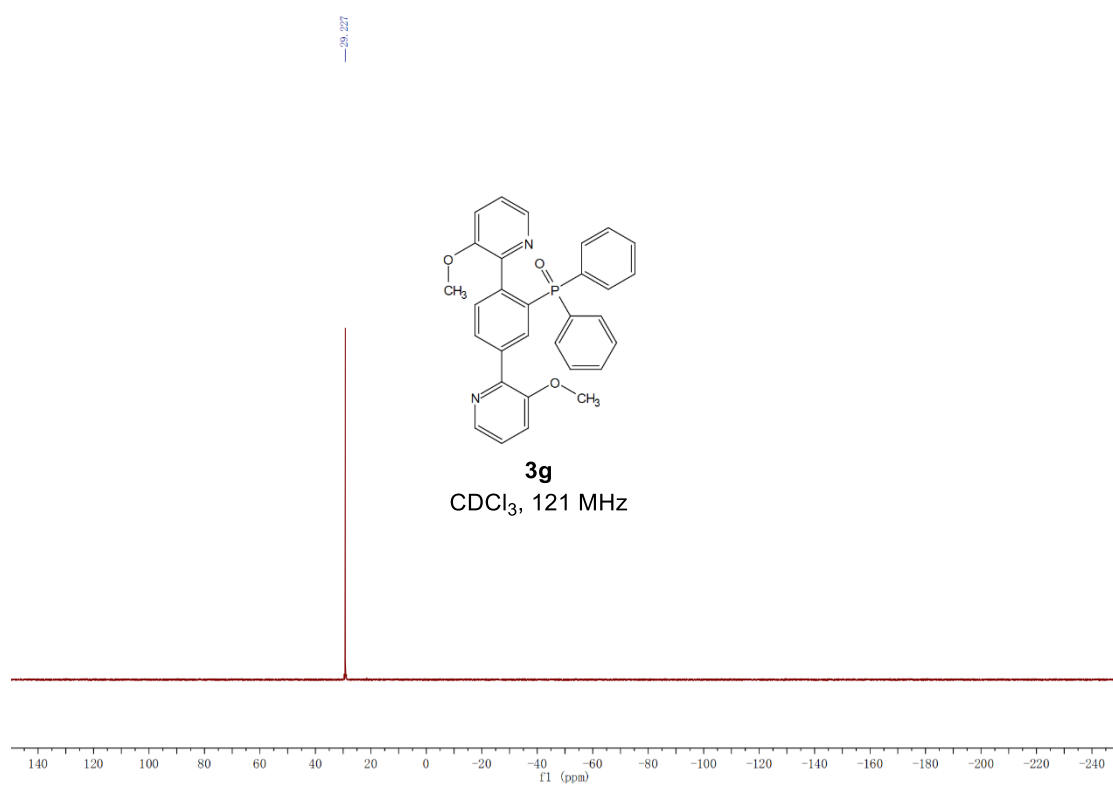

(2-(4,4-Dimethyl-4,5-dihydrooxazol-2-yl)phenyl)diphenylphosphine oxide (**3h**)

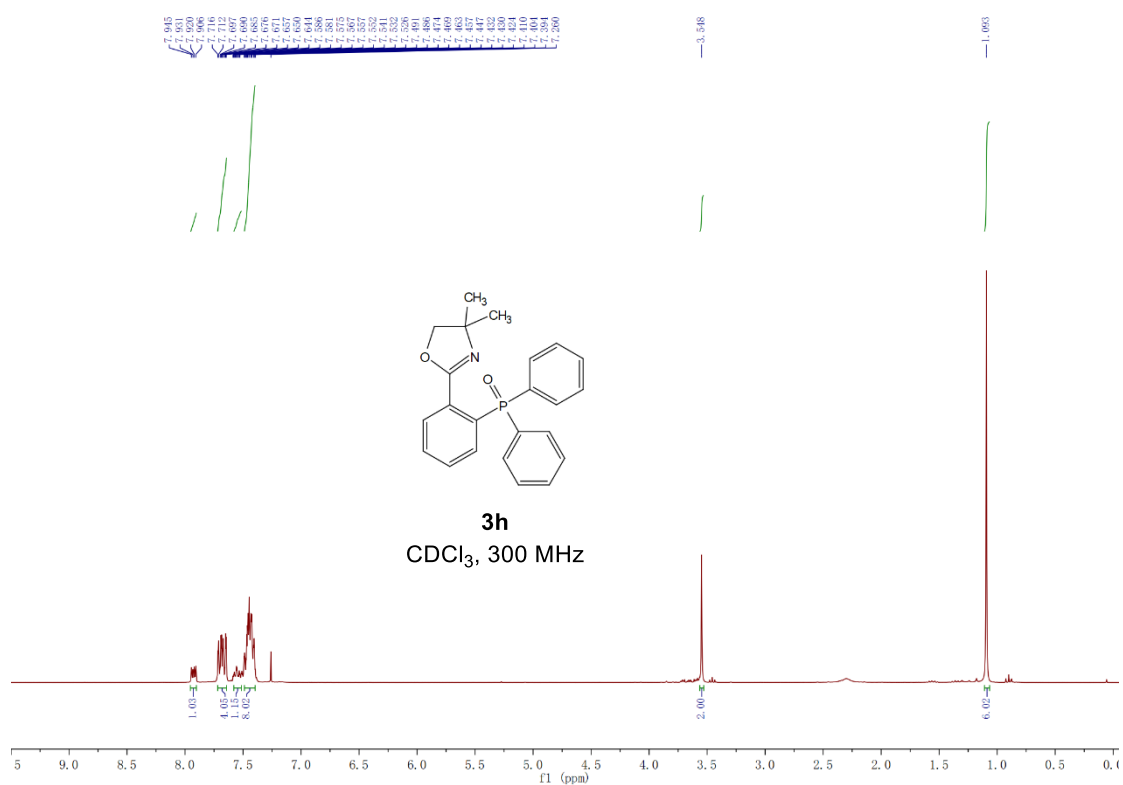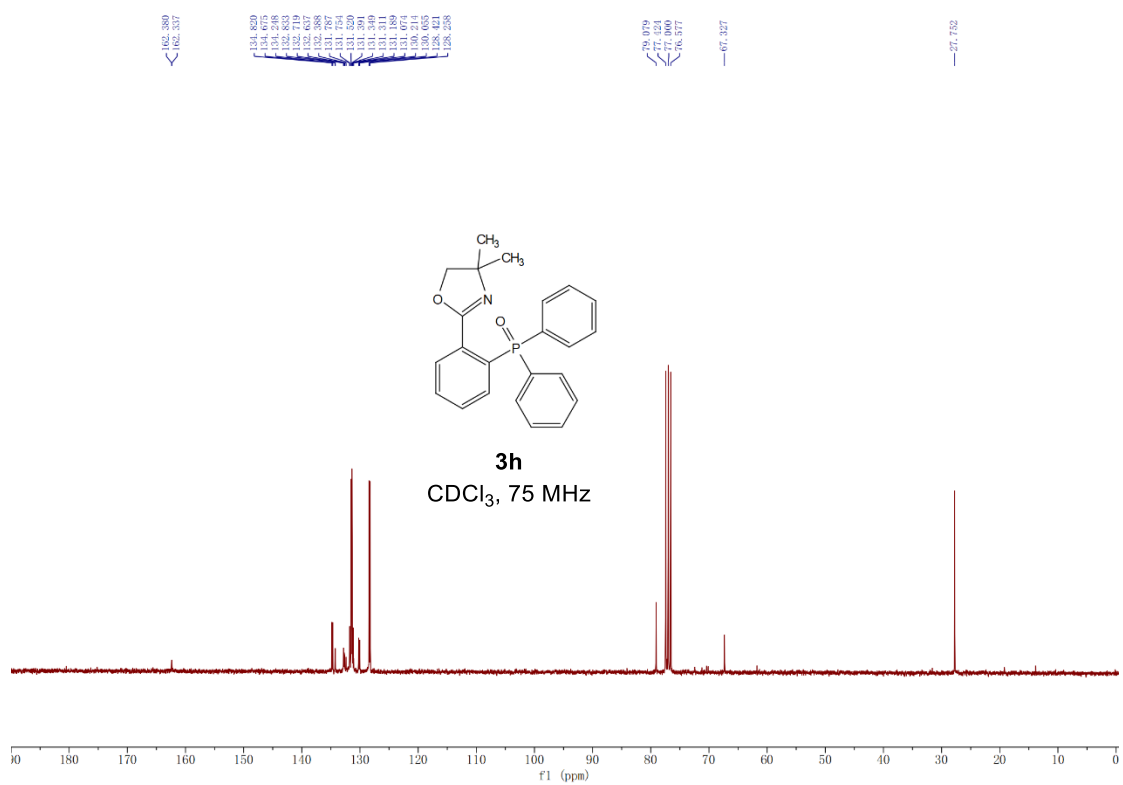

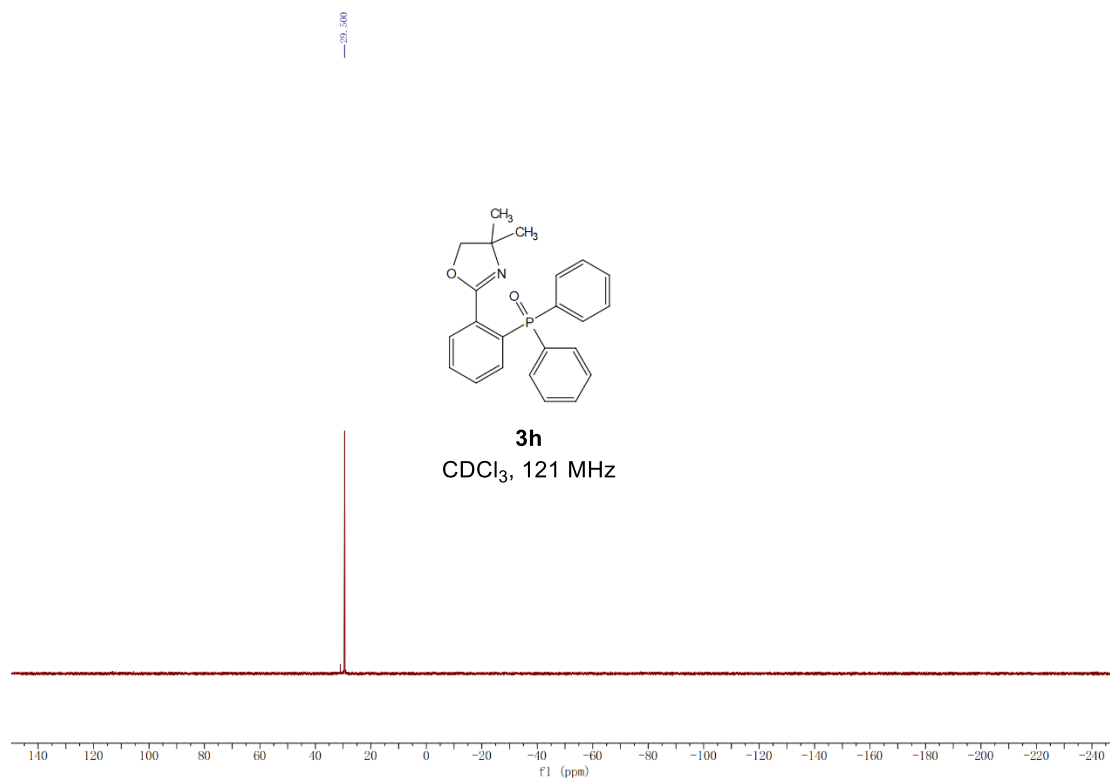

(E)-2-(1-(Methoxyimino)ethyl)phenyl)diphenylphosphine oxide (**3i**)

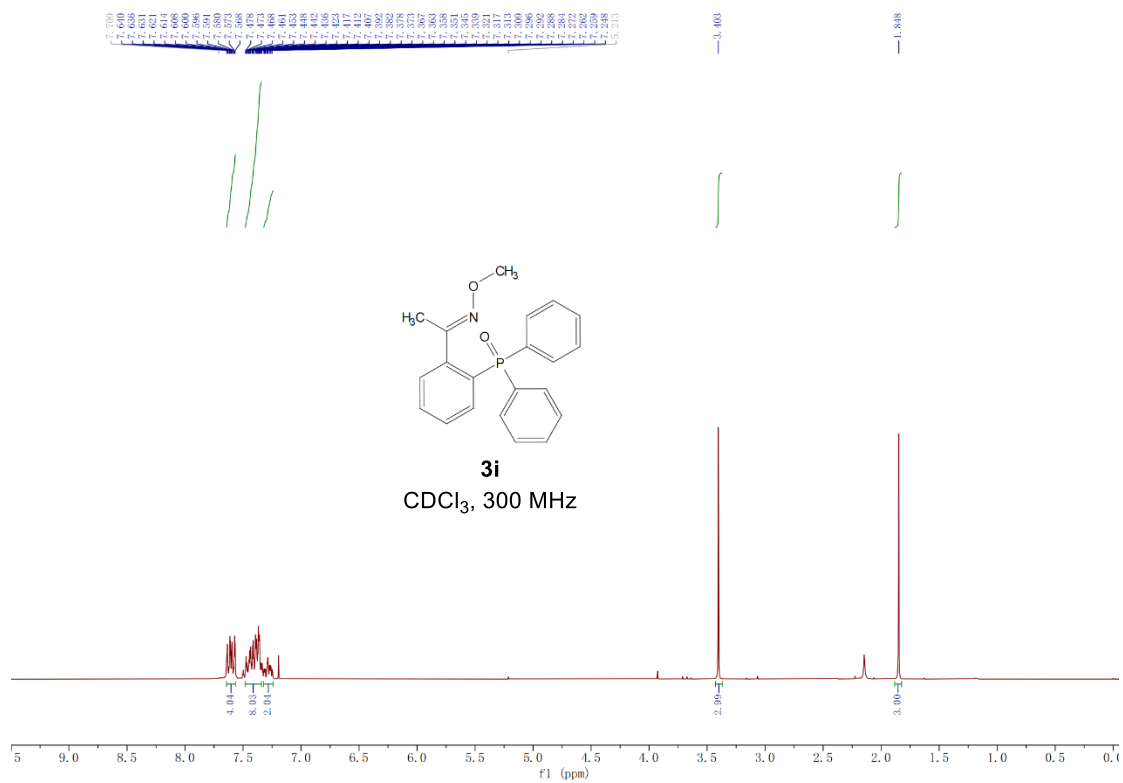

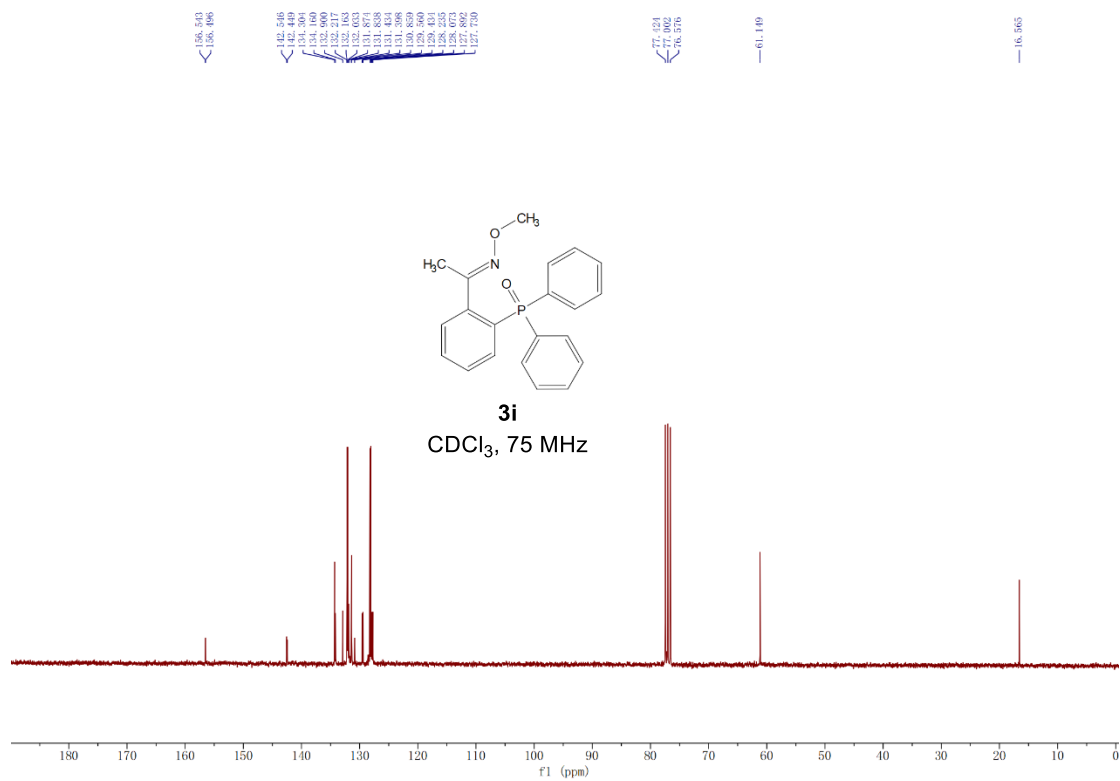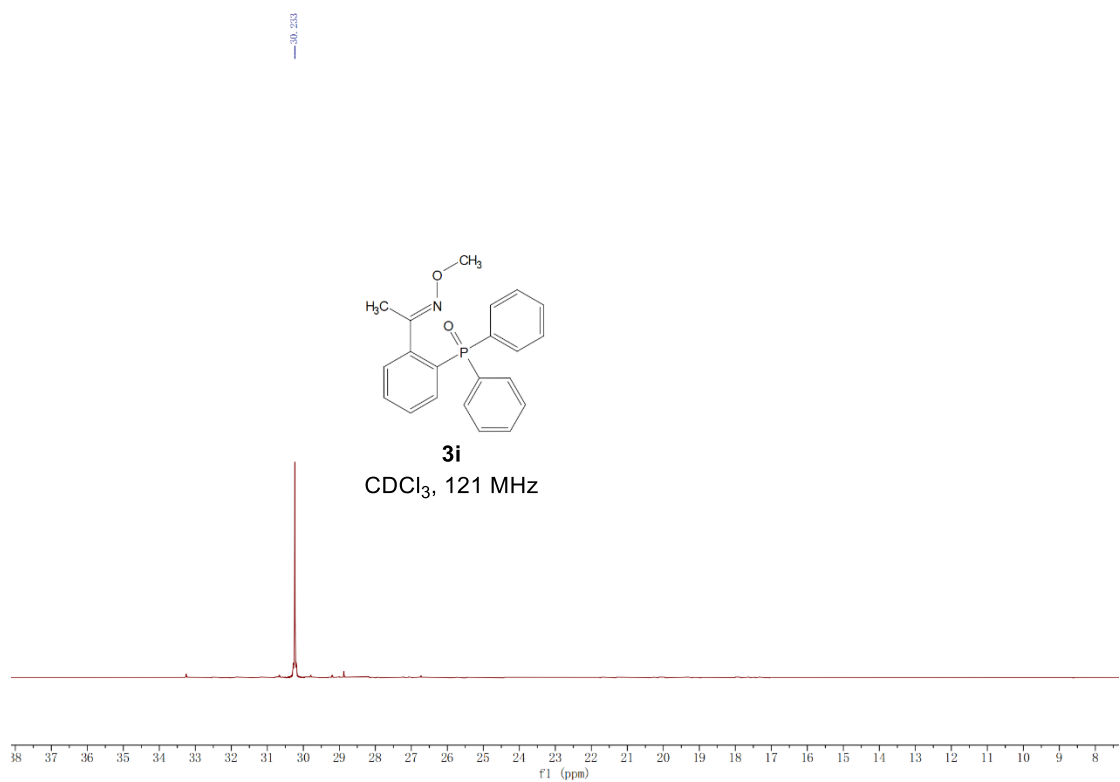

Diphenyl(2-(pyrazin-2-yl)phenyl)phosphine oxide (**3j**)

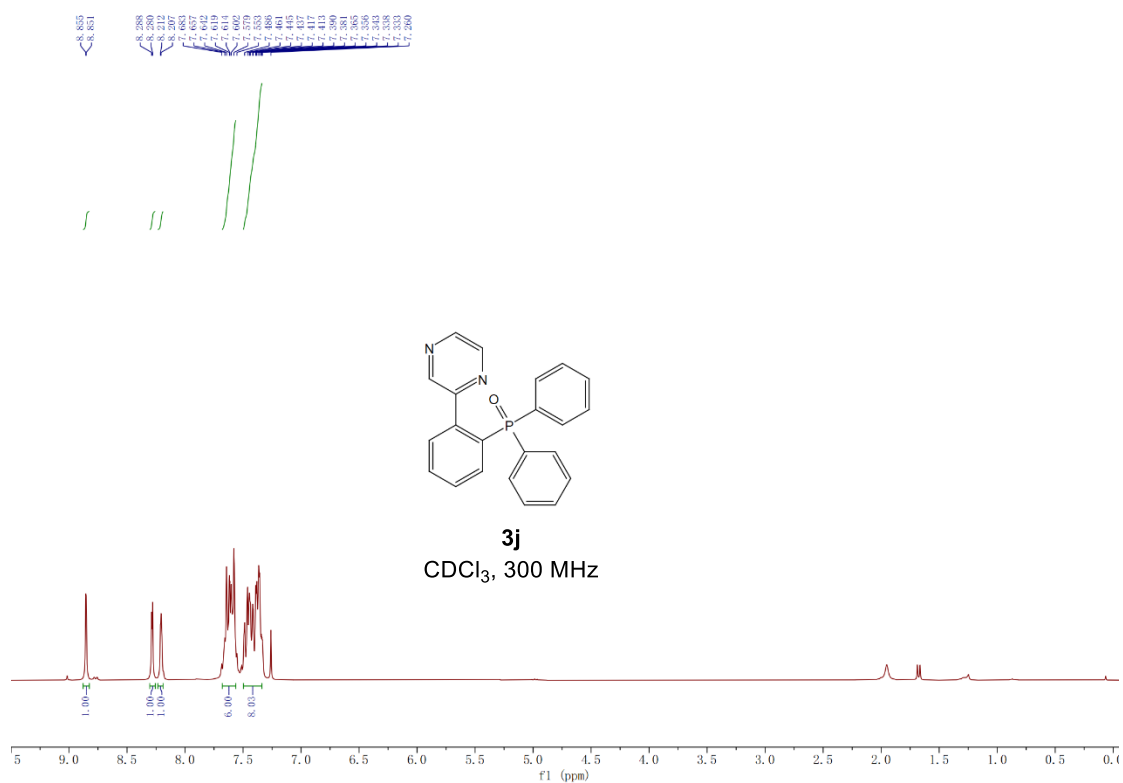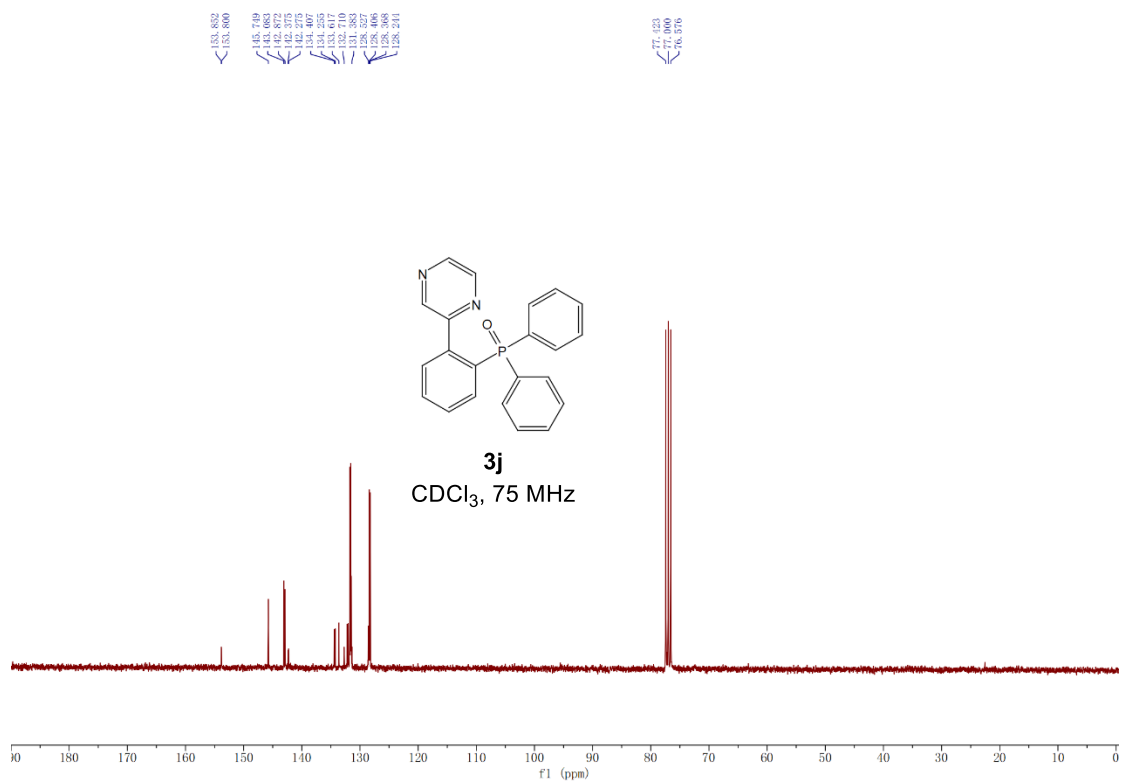

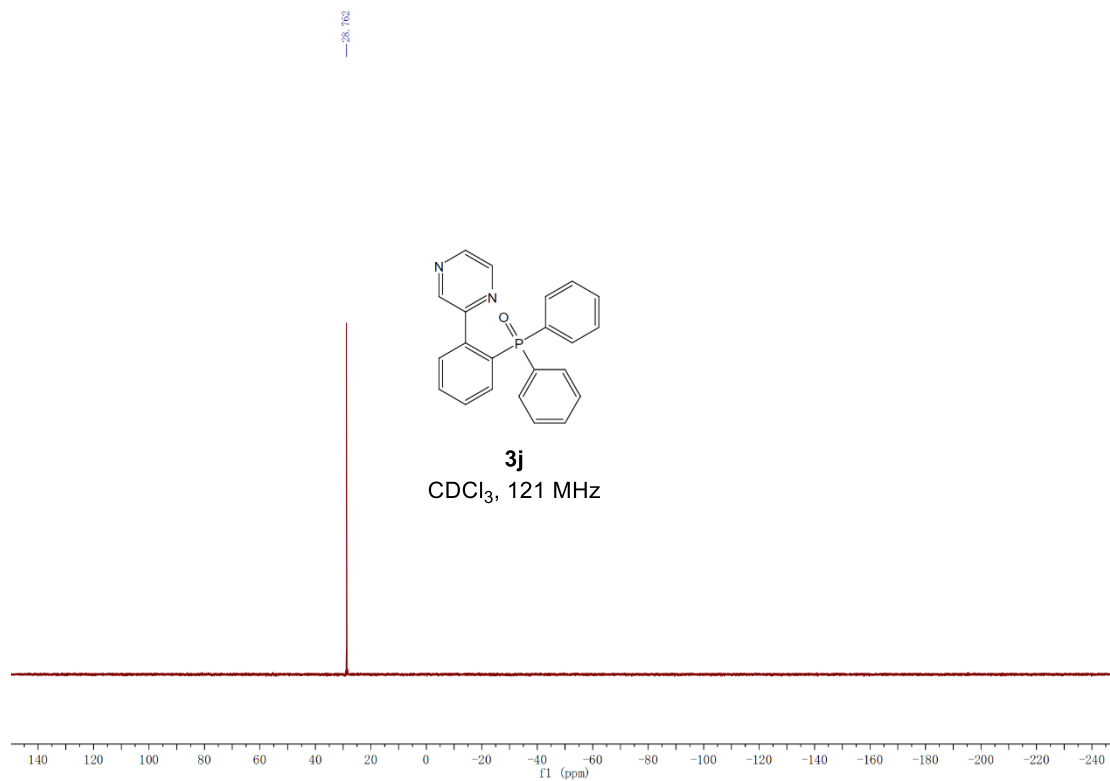

Diphenyl(2-(3-phenylpyrazin-2-yl)phenyl)phosphine oxide (**3k**)

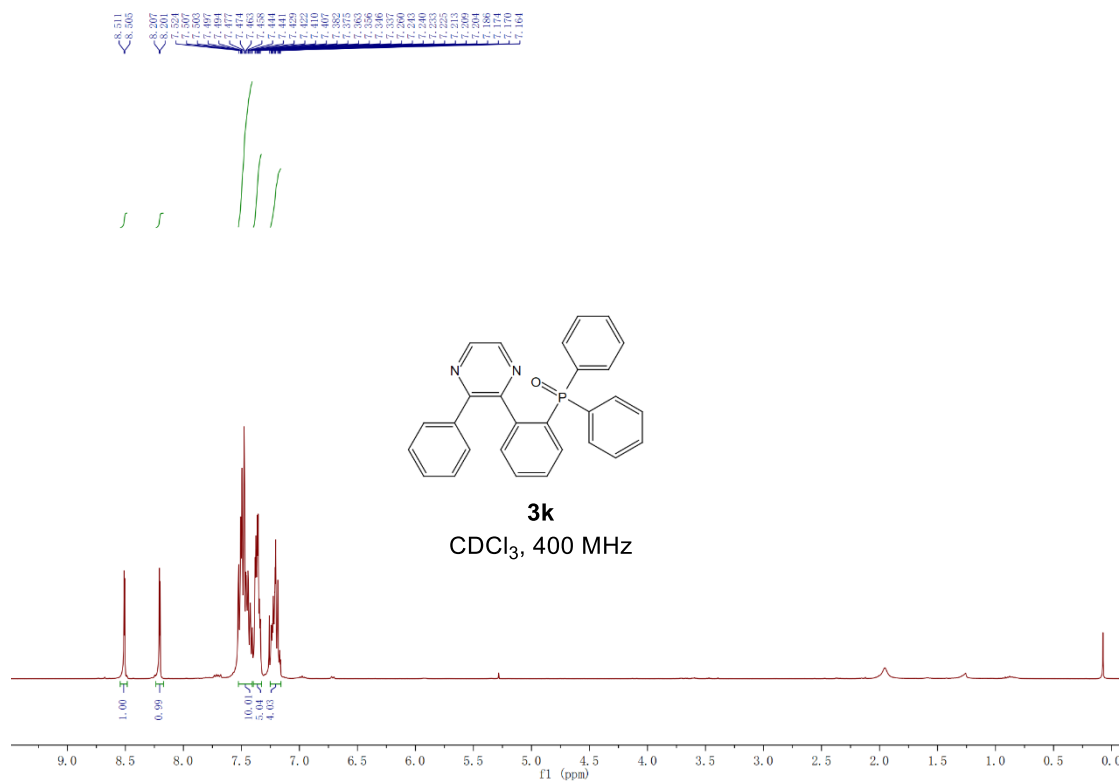



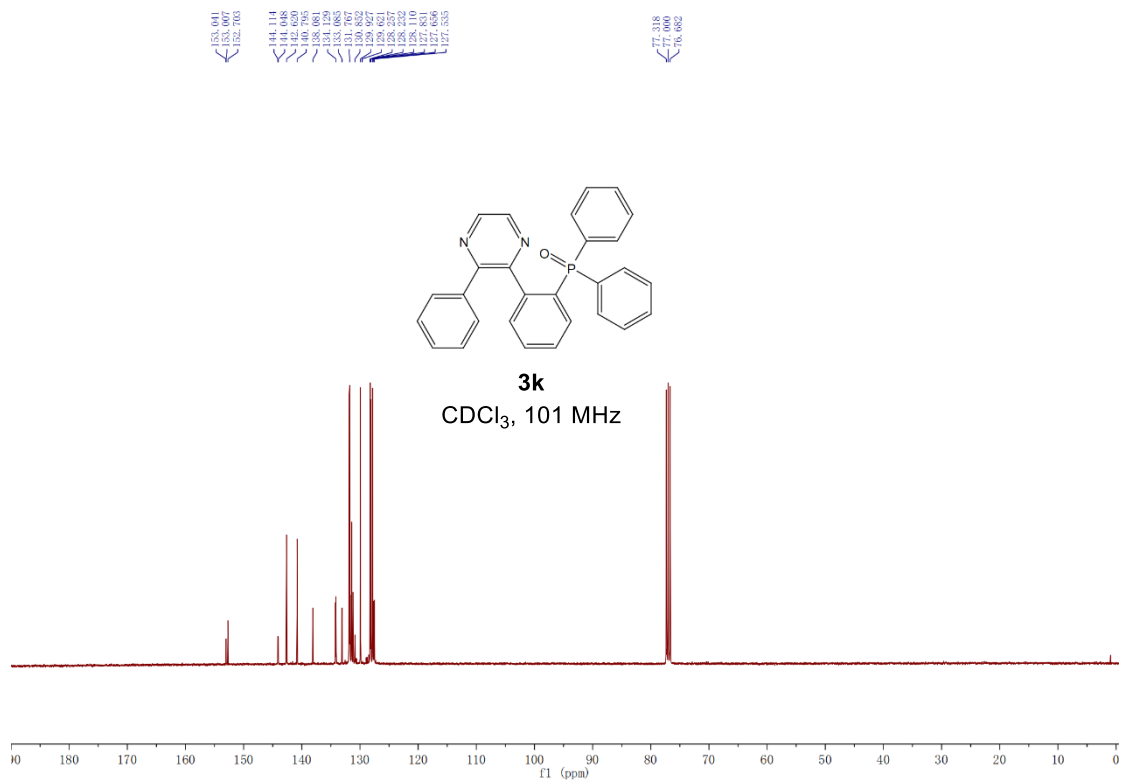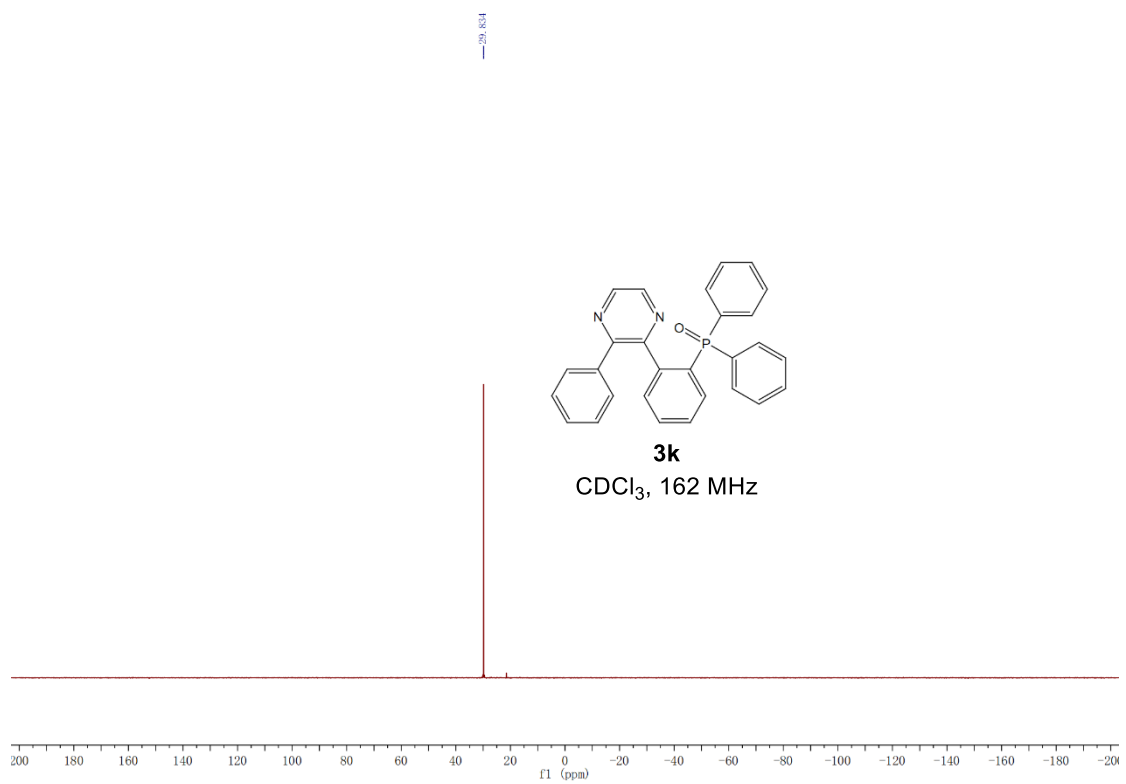

Diphenyl(2-(pyridin-2-yl)phenyl)phosphine oxide (**31**)

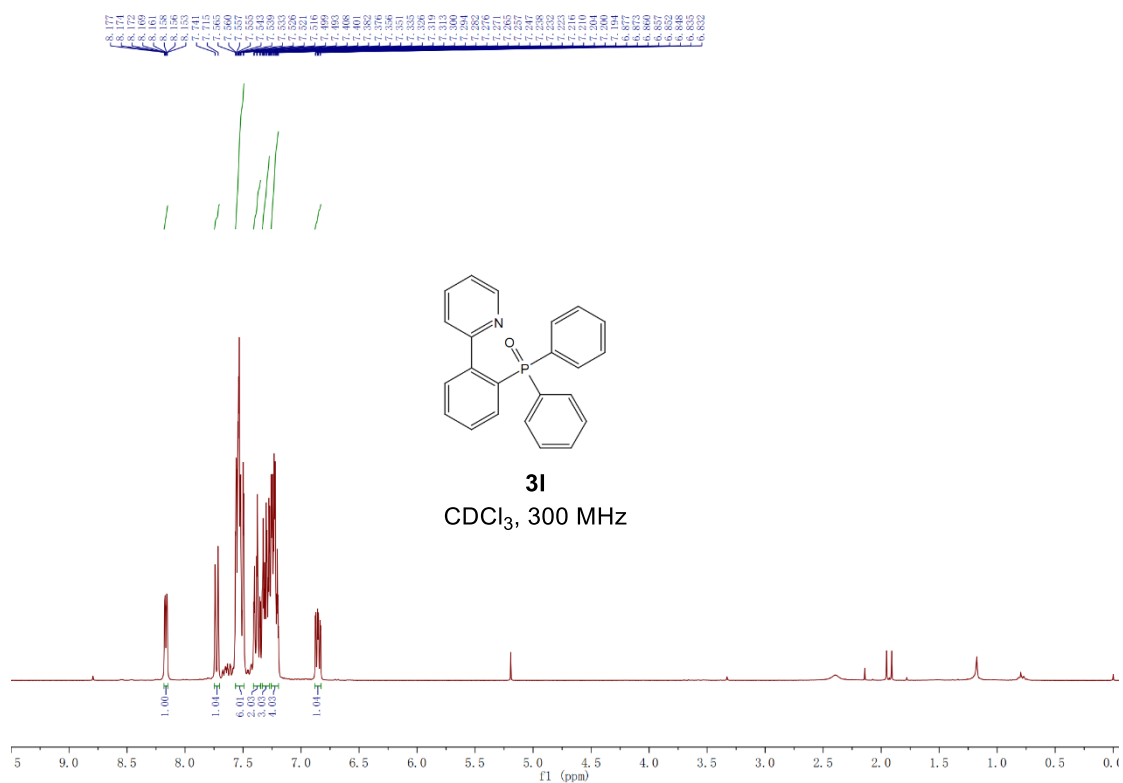

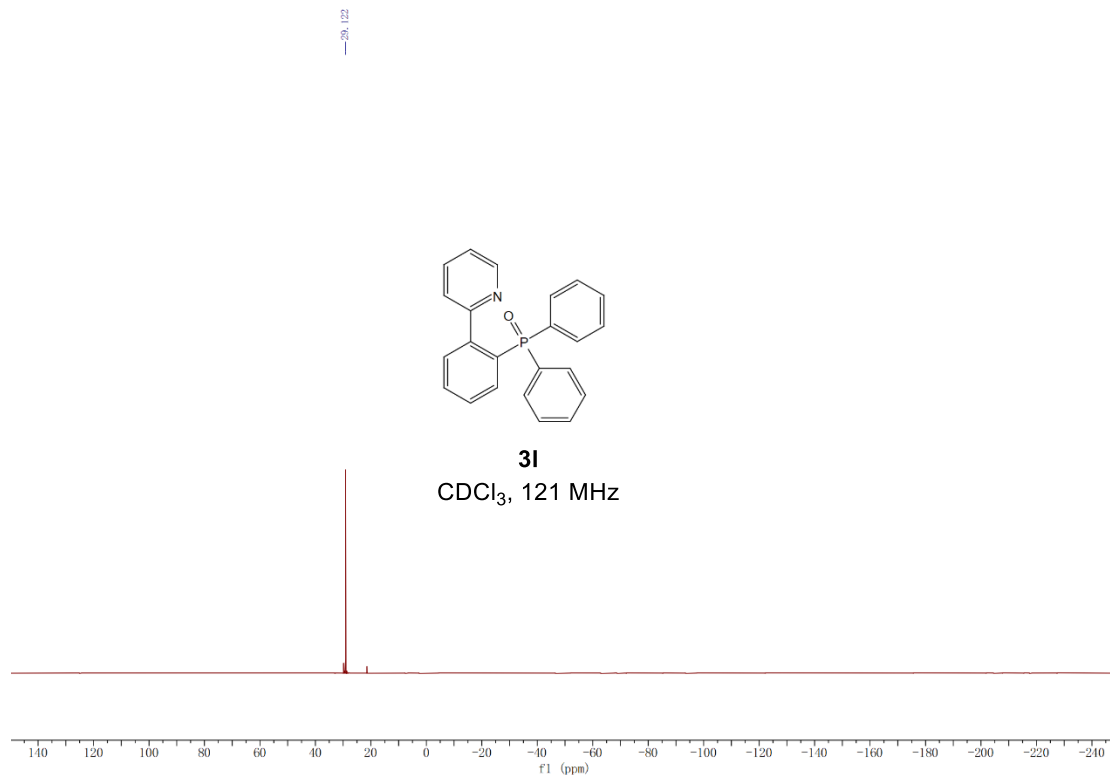

Diphenyl(2-(pyridin-2-yl)thiophen-3-yl)phosphine oxide (**3m**)

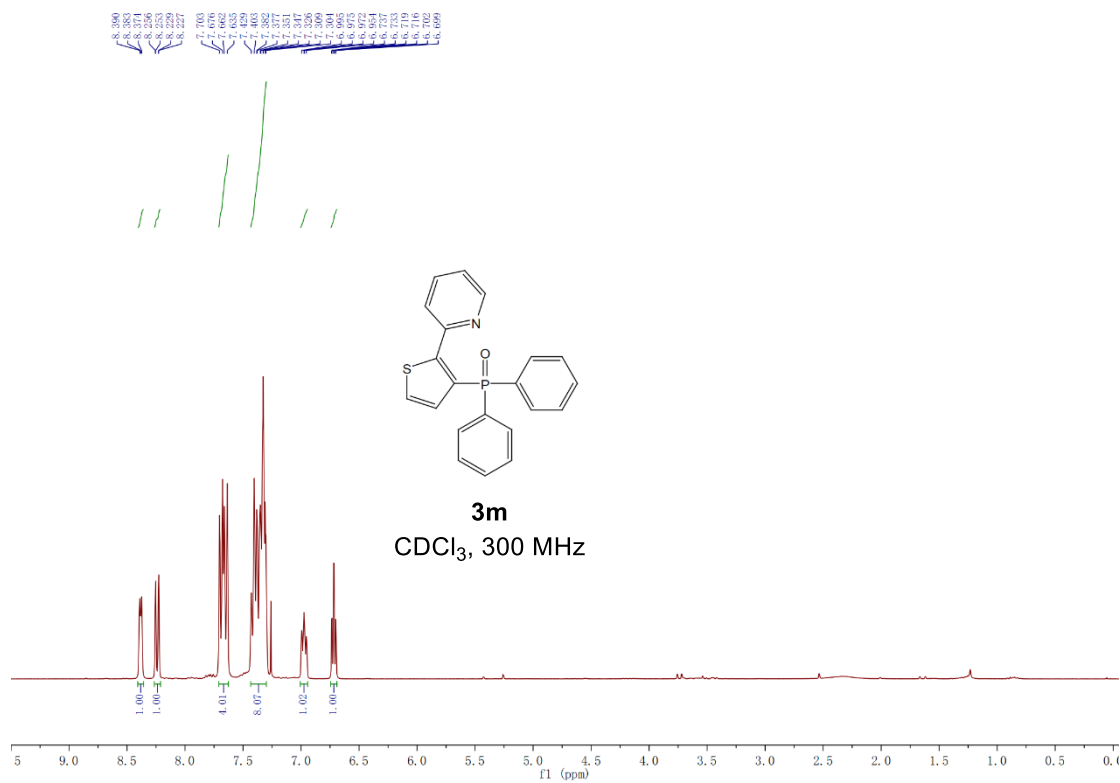

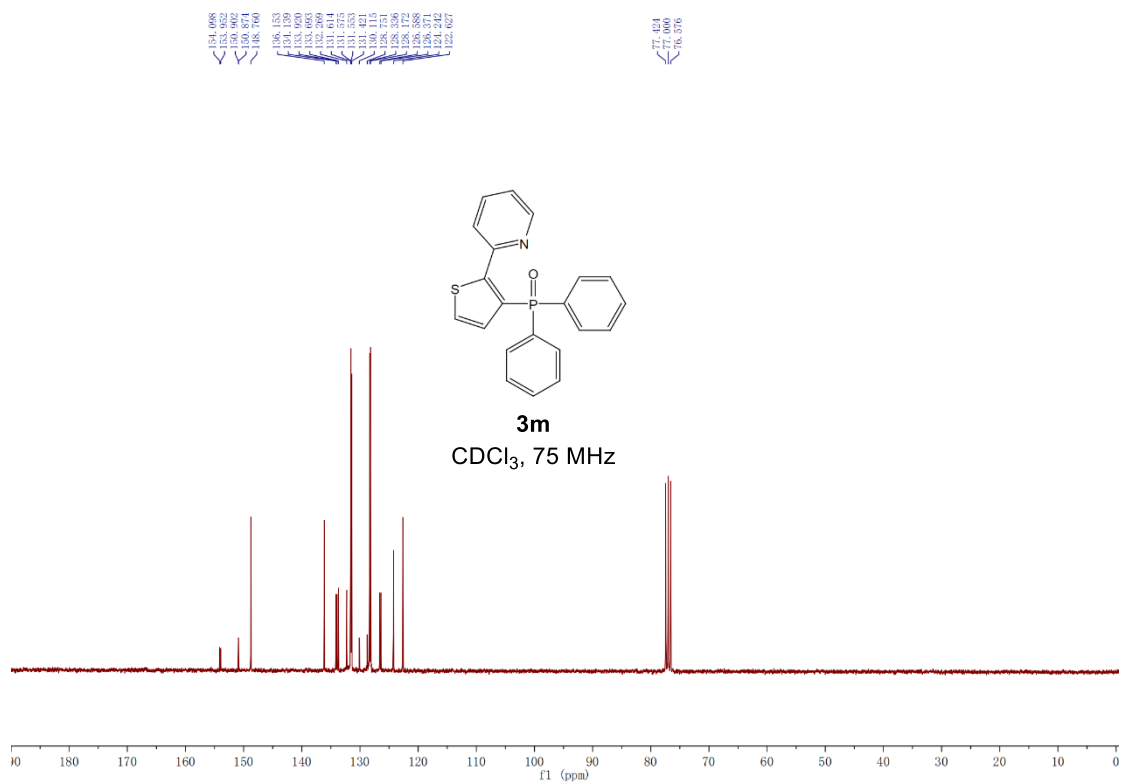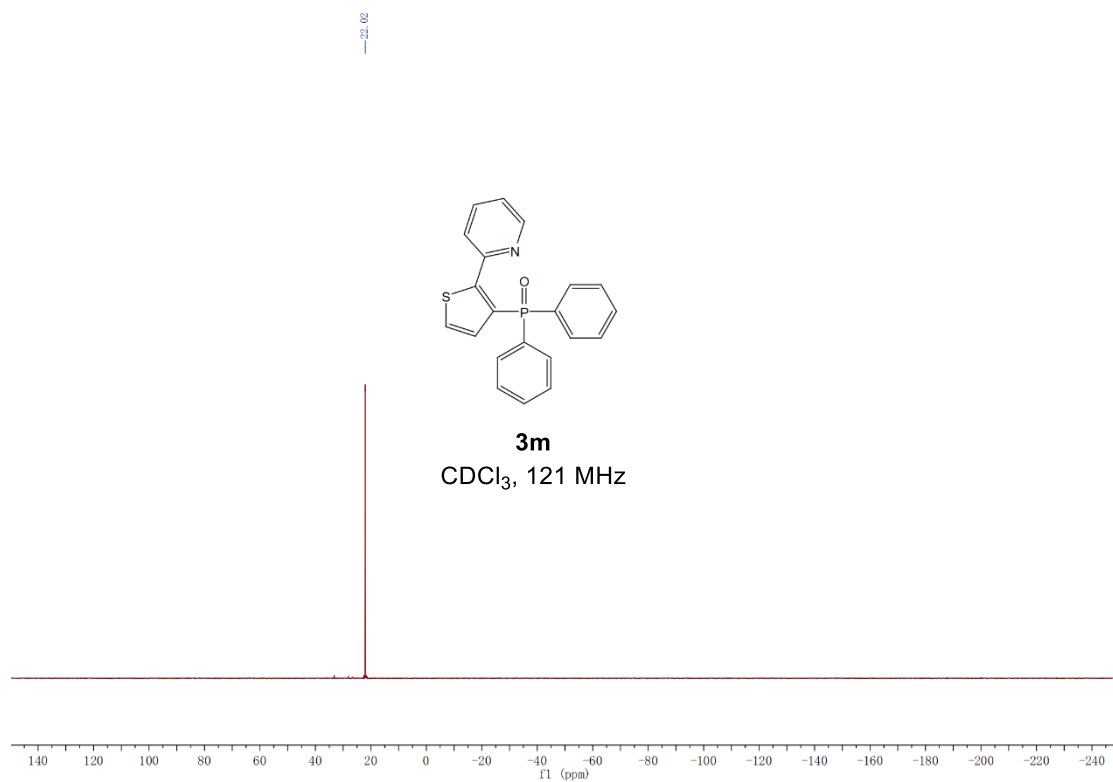

(2-(1-methyl-1H-benzo[d]imidazol-2-yl)phenyl)diphenylphosphine oxide (**3n**)

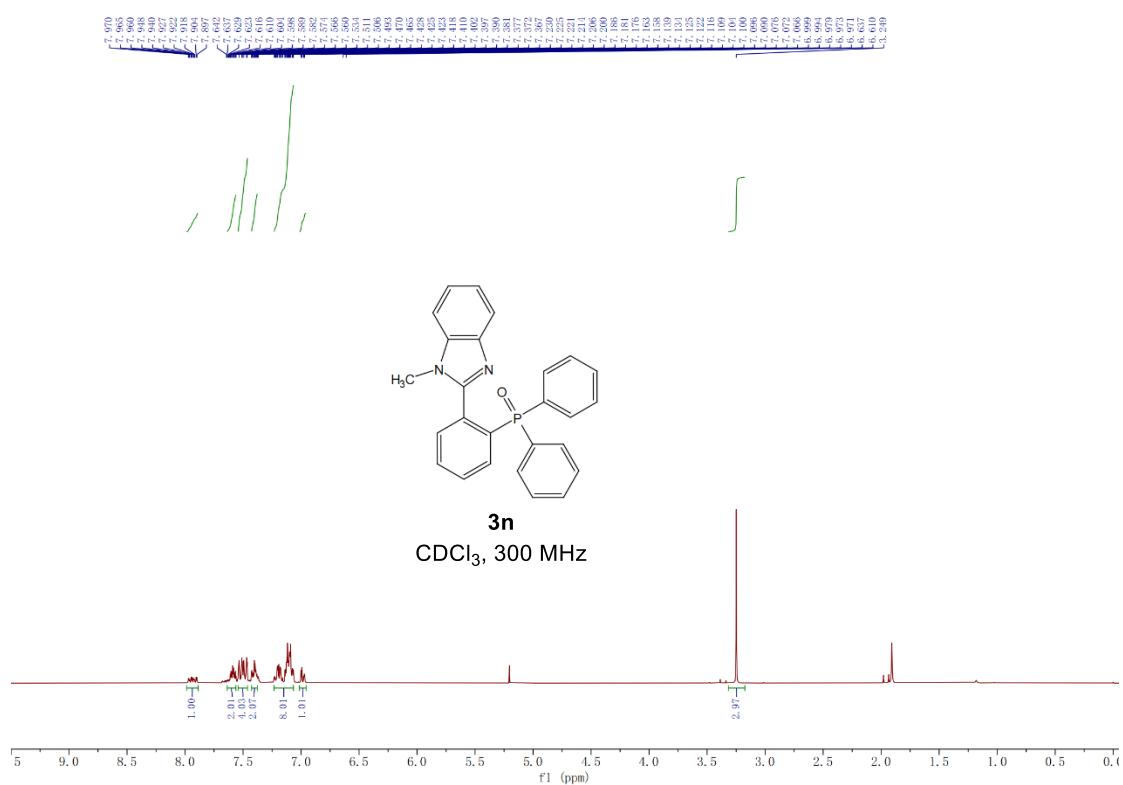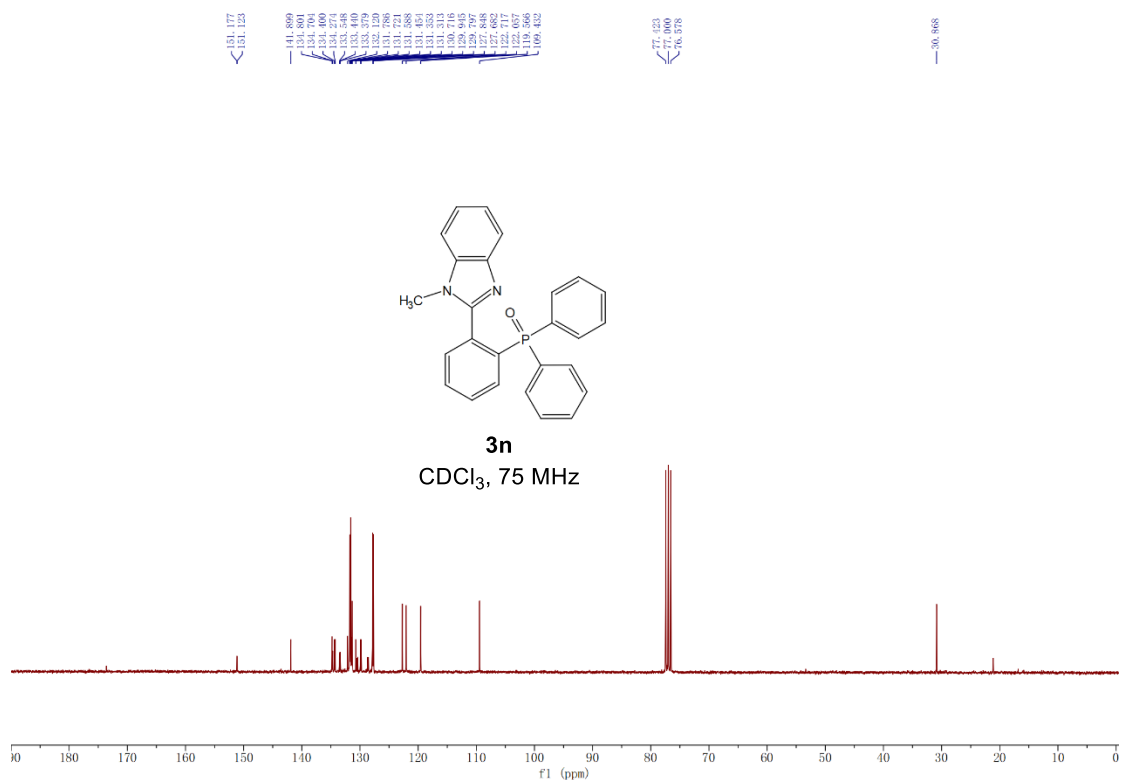

-28.703

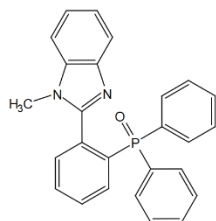

**3n**  
CDCl<sub>3</sub>, 121 MHz

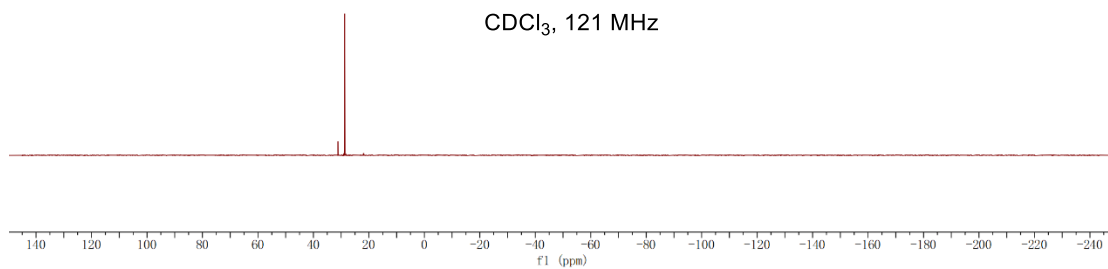

(2-(9-Isopropyl-9H-purin-6-yl)phenyl)di(naphthalen-2-yl)phosphine oxide (**3o**)

8.526  
8.307  
8.261  
7.937  
7.921  
7.835  
7.751  
7.668  
7.635  
7.565  
7.540  
7.484  
7.461  
7.423  
7.408  
7.390

4.515  
4.493  
4.471  
4.426  
4.403  
4.381

1.323  
1.311

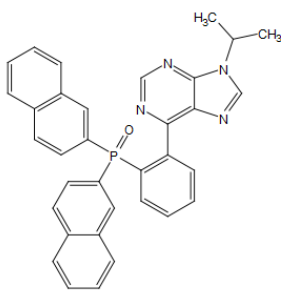

**3o**  
CDCl<sub>3</sub>, 300 MHz

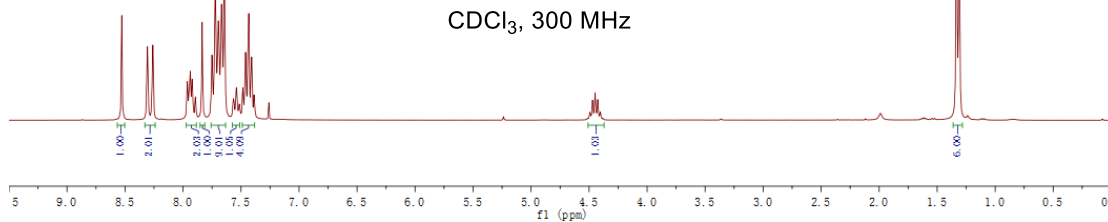

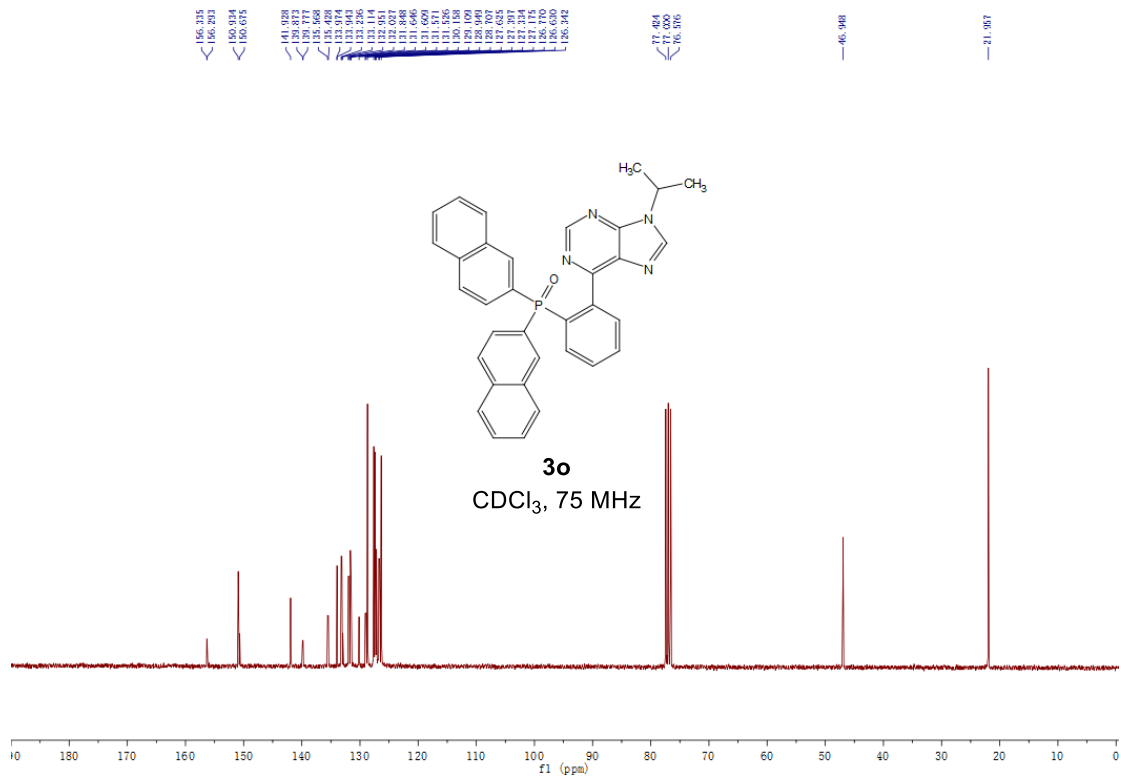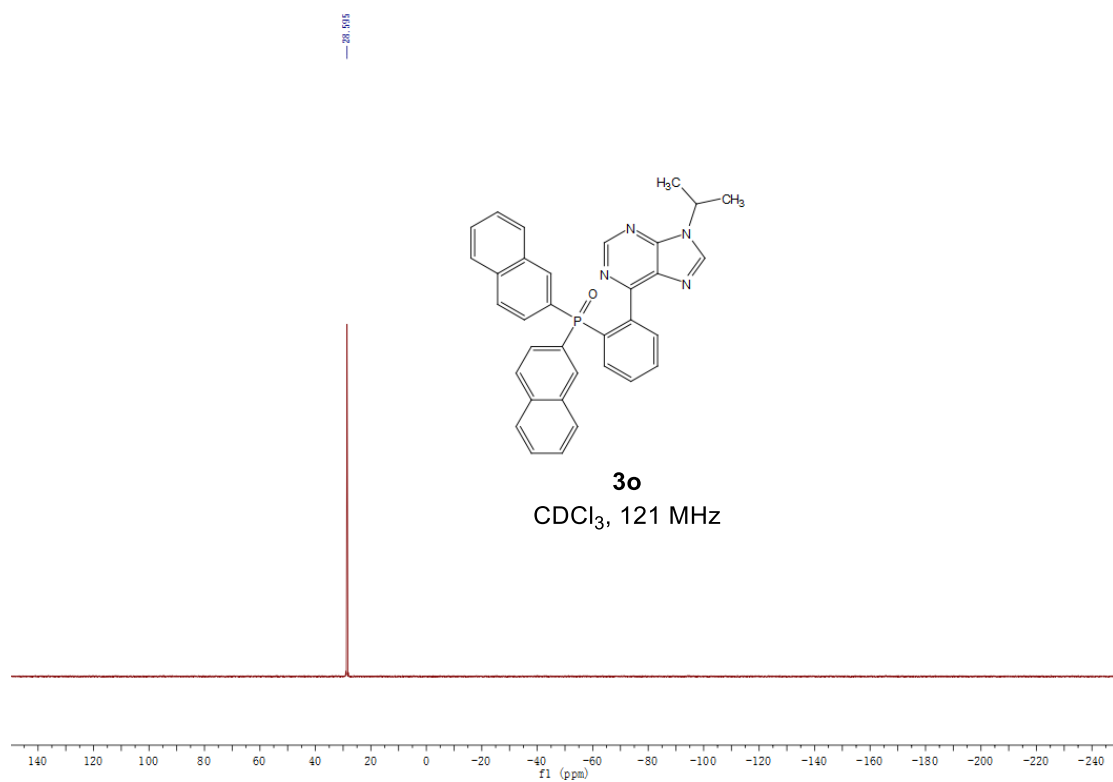

(2-(9-Isopropyl-9H-purin-6-yl)phenyl)di-p-tolylphosphine oxide (**3p**)

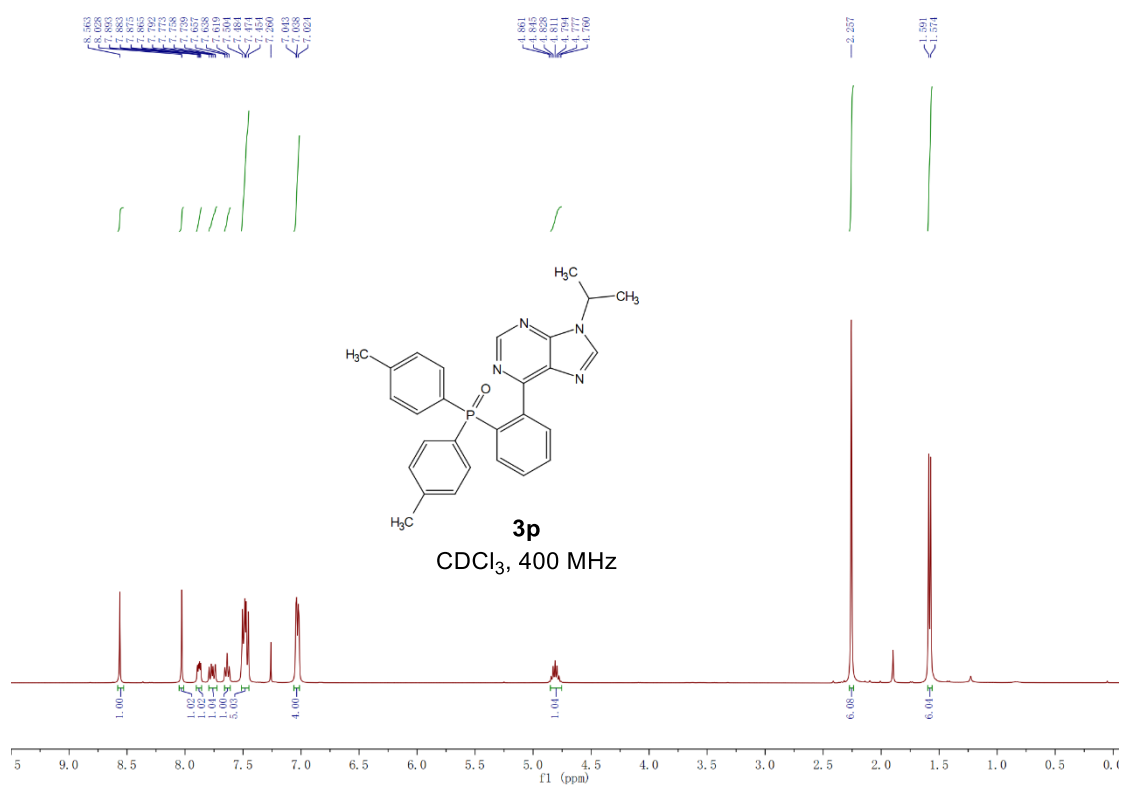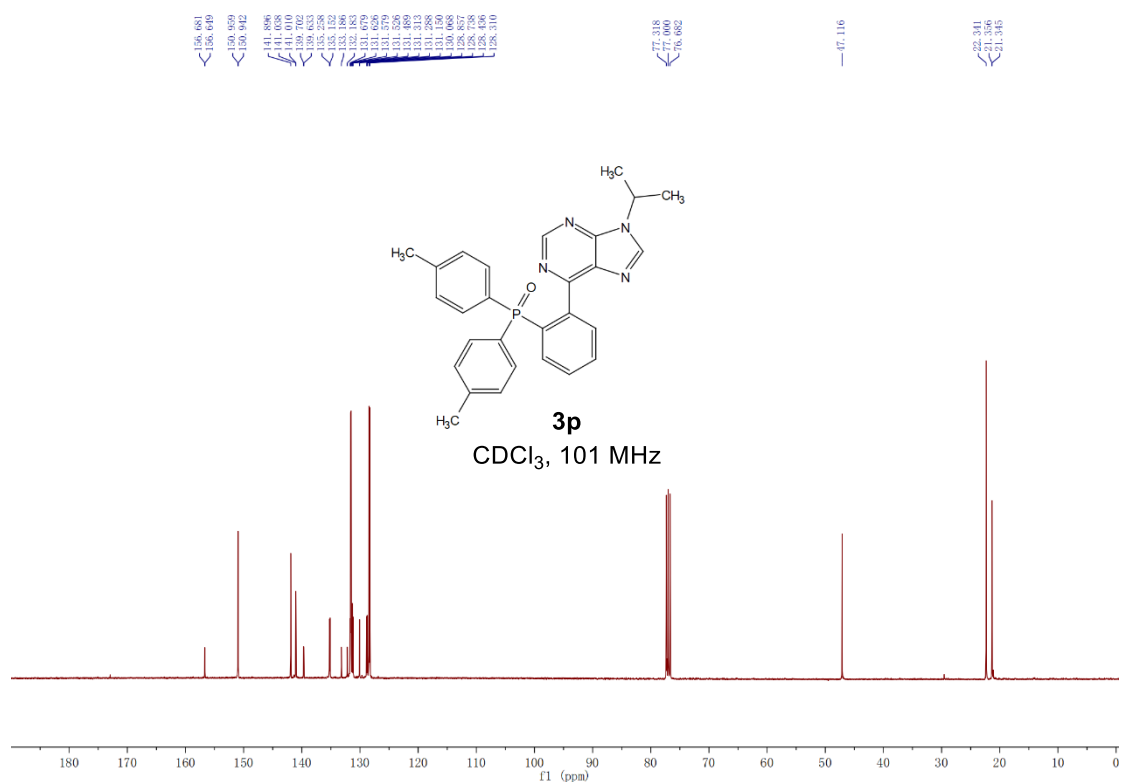



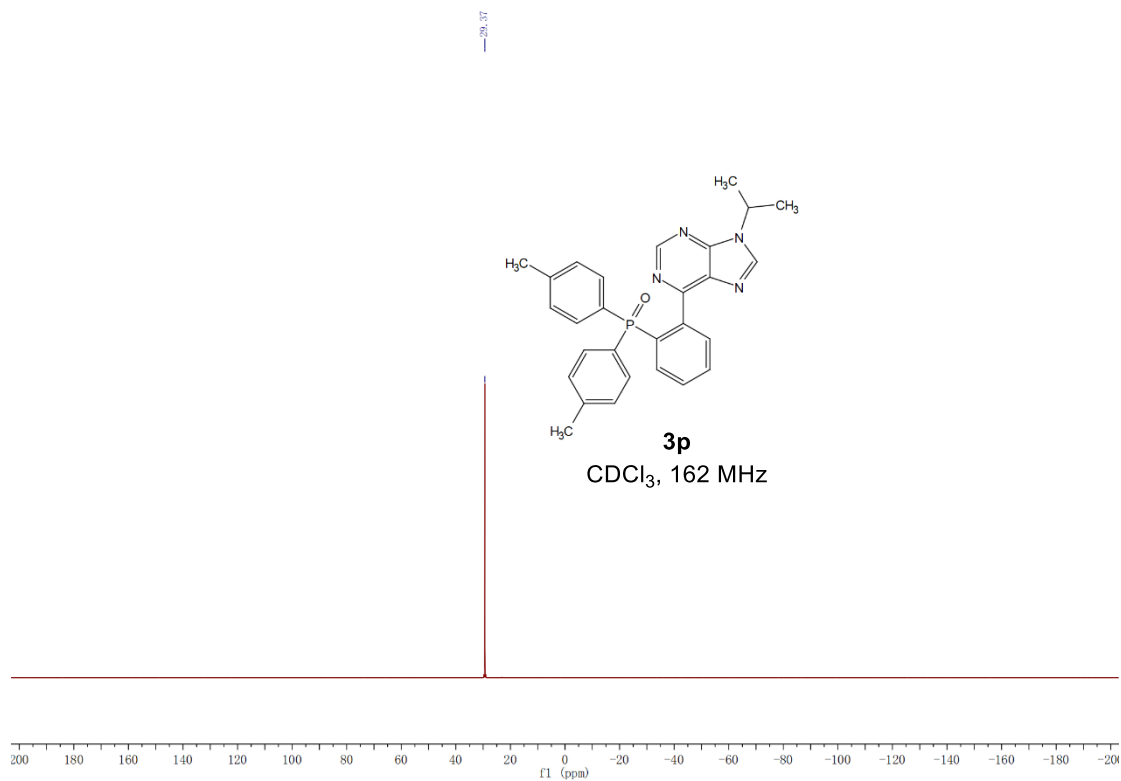

Bis(4-chlorophenyl)(2-(9-isopropyl-9H-purin-6-yl)phenyl)phosphine oxide (**3q**)

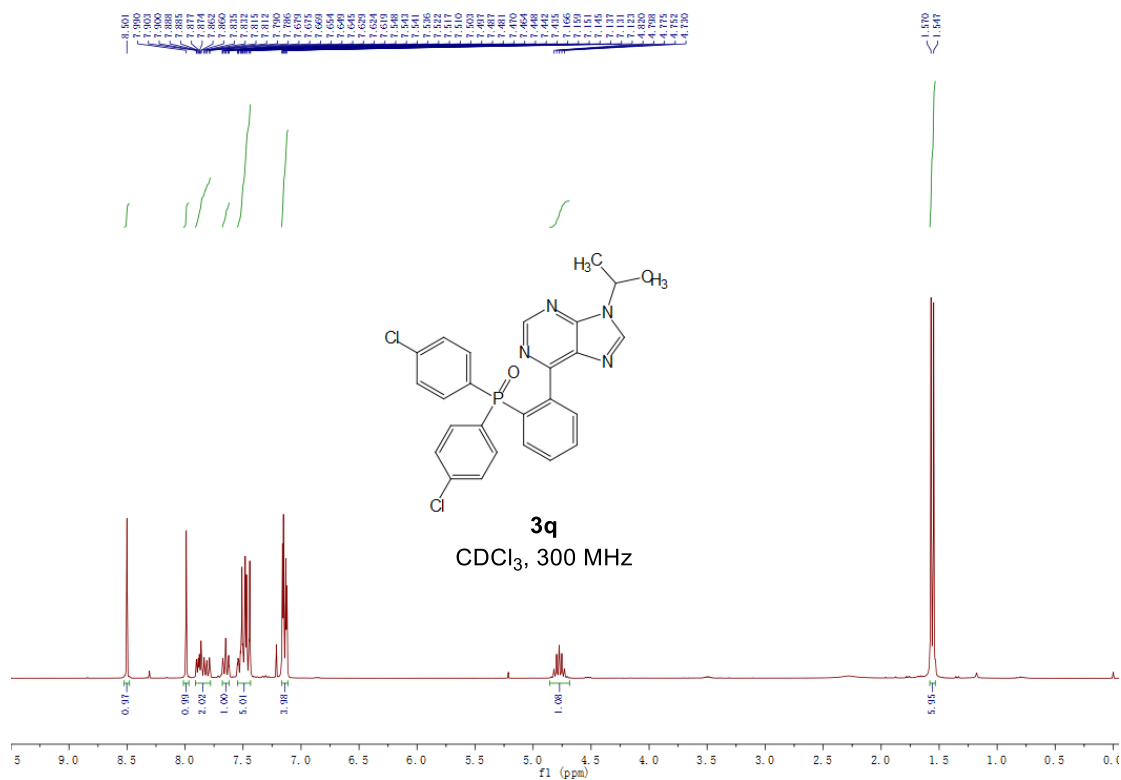

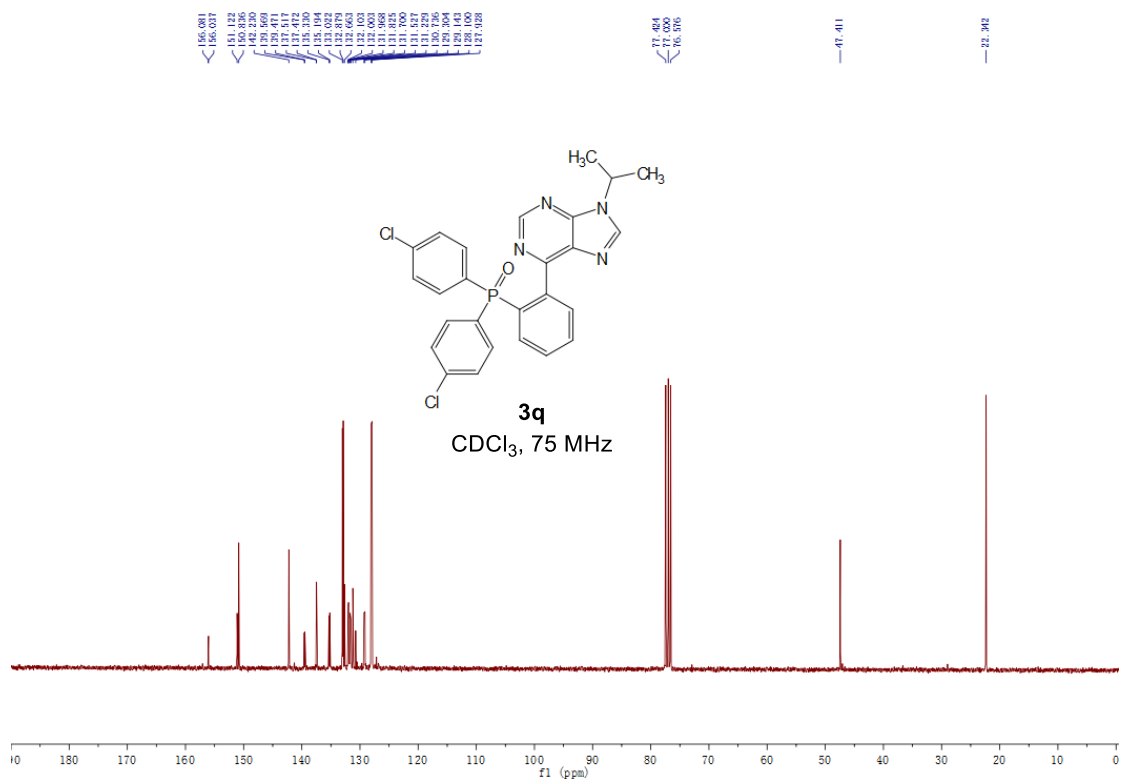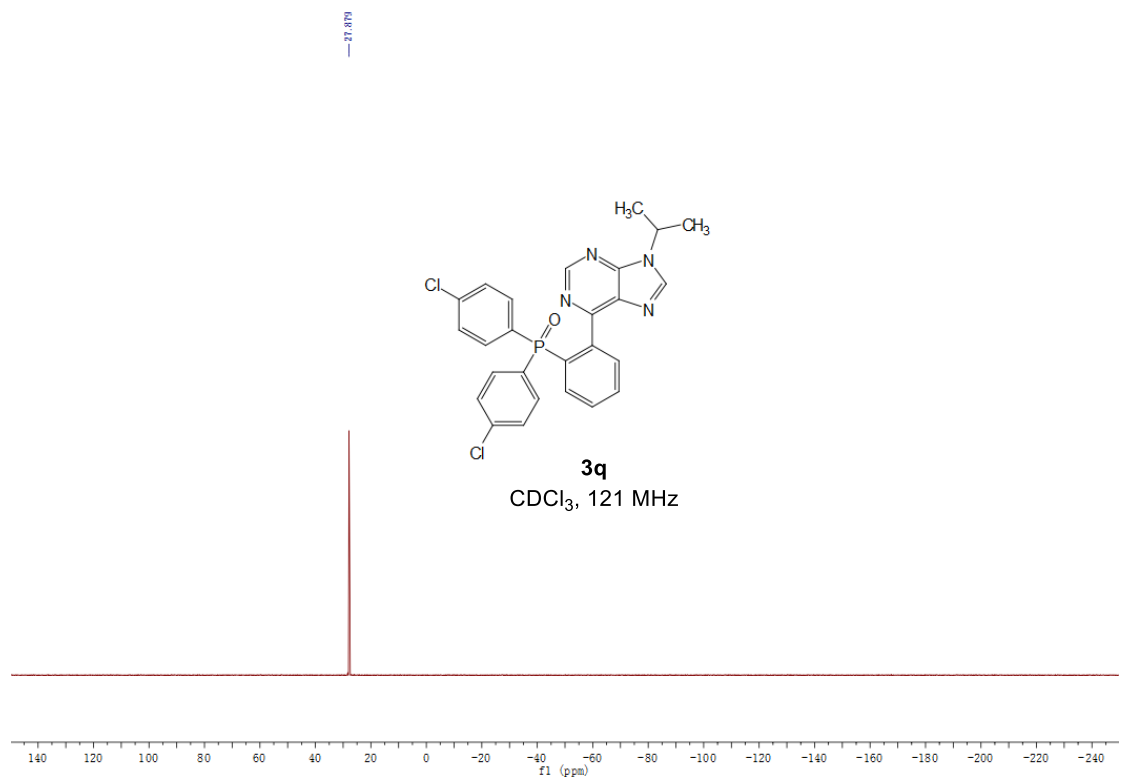

(2-(9-Isopropyl-9H-purin-6-yl)phenyl)bis(4-methoxyphenyl)phosphine oxide (**3r**)

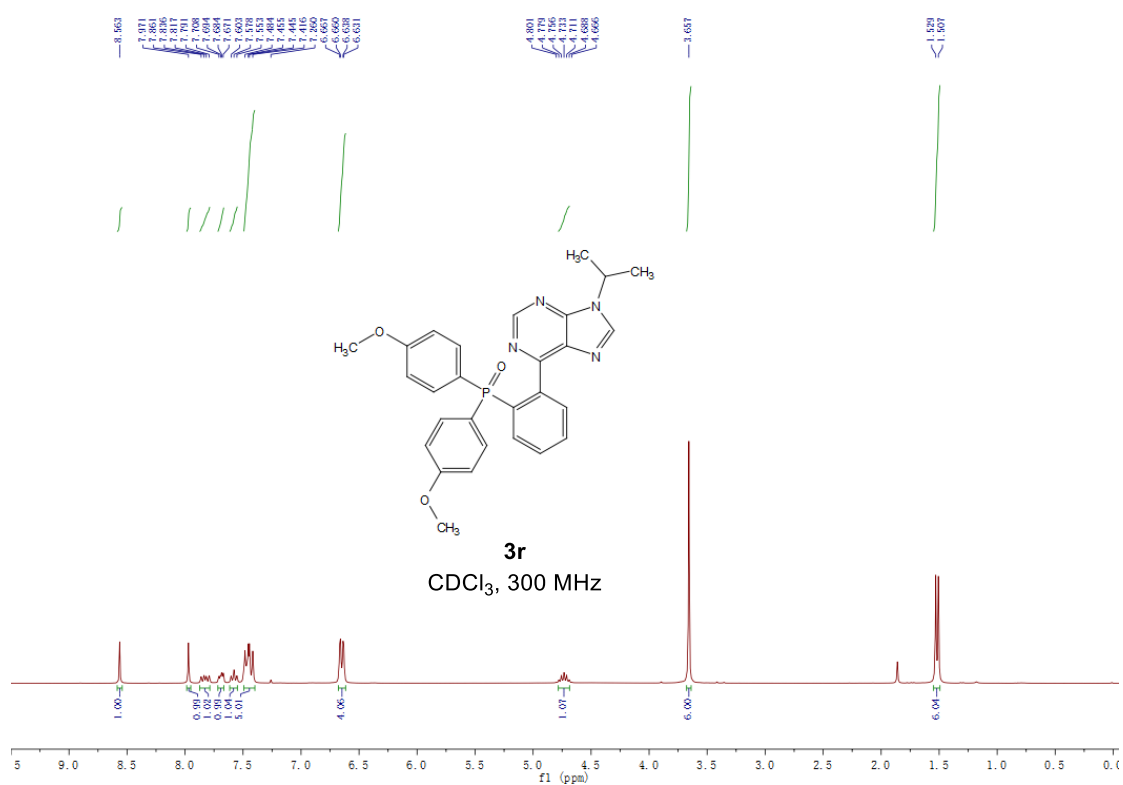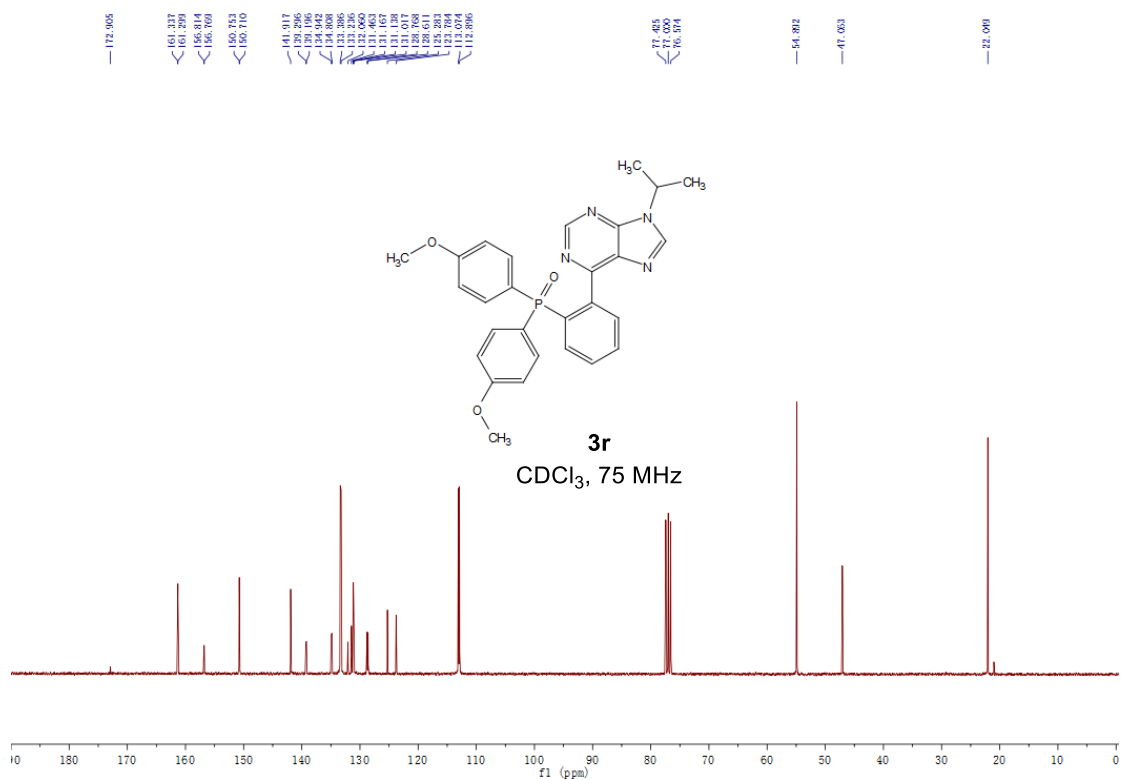

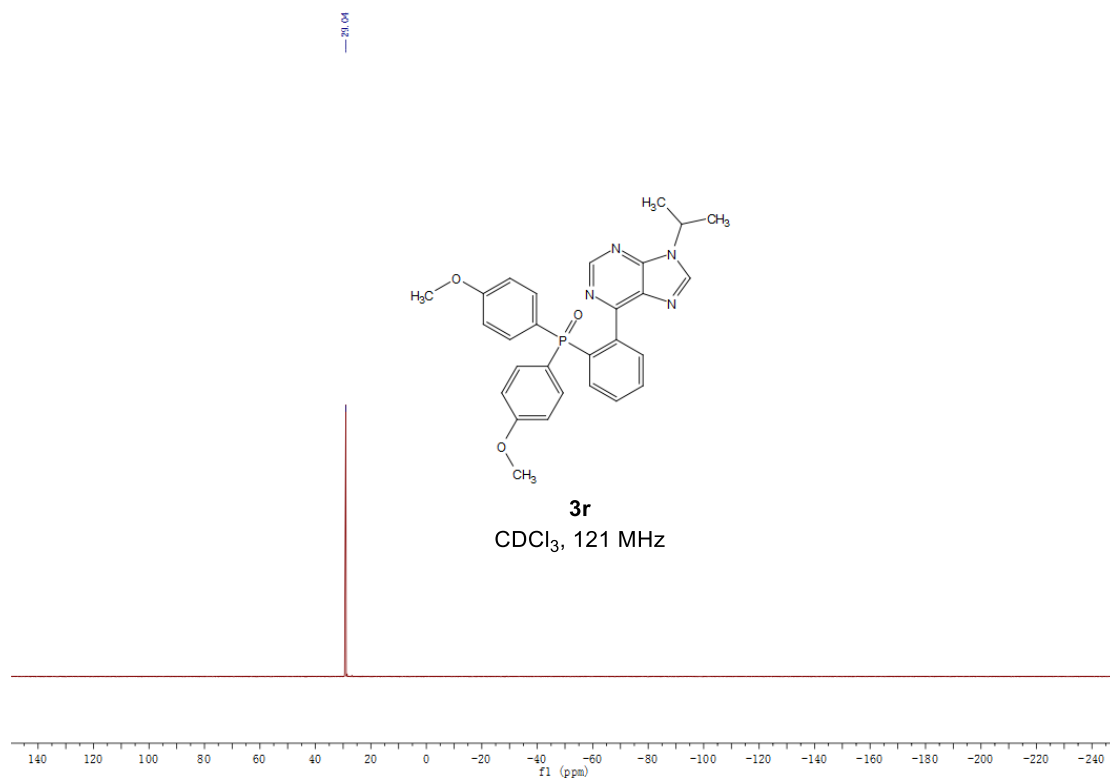

Di([1,1'-biphenyl]-4-yl)(2-(9-isopropyl-9H-purin-6-yl)phenyl)phosphine oxide (**3s**)

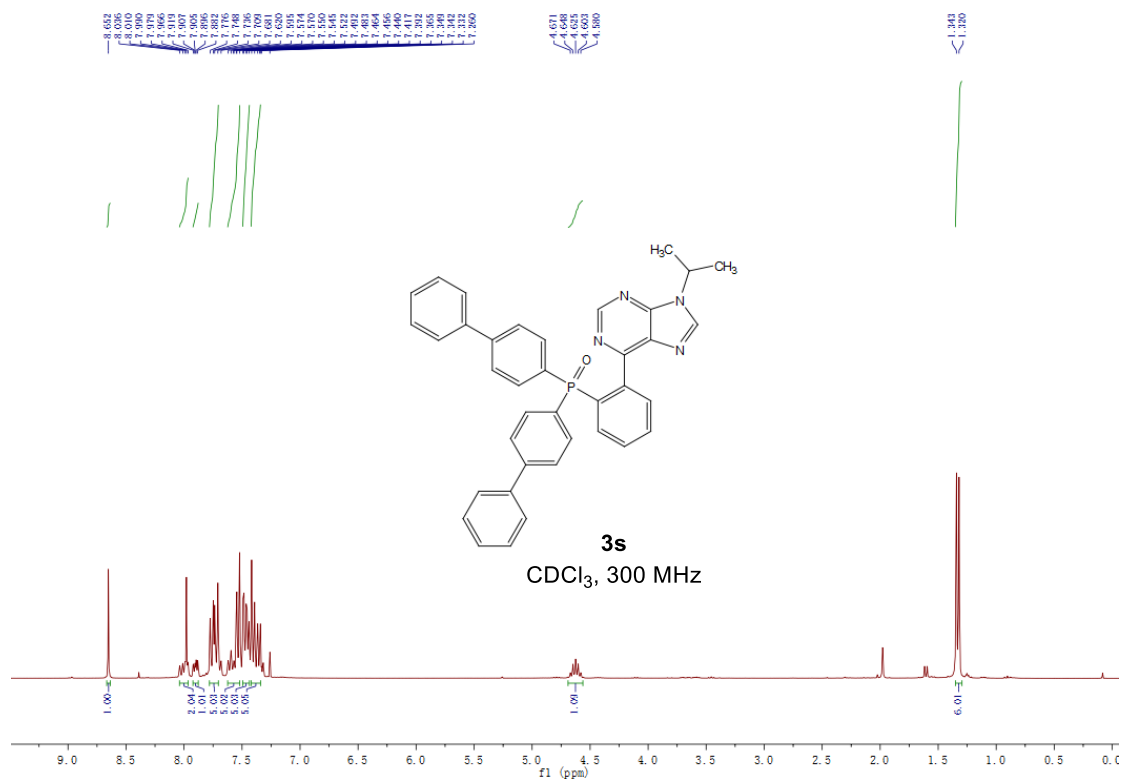

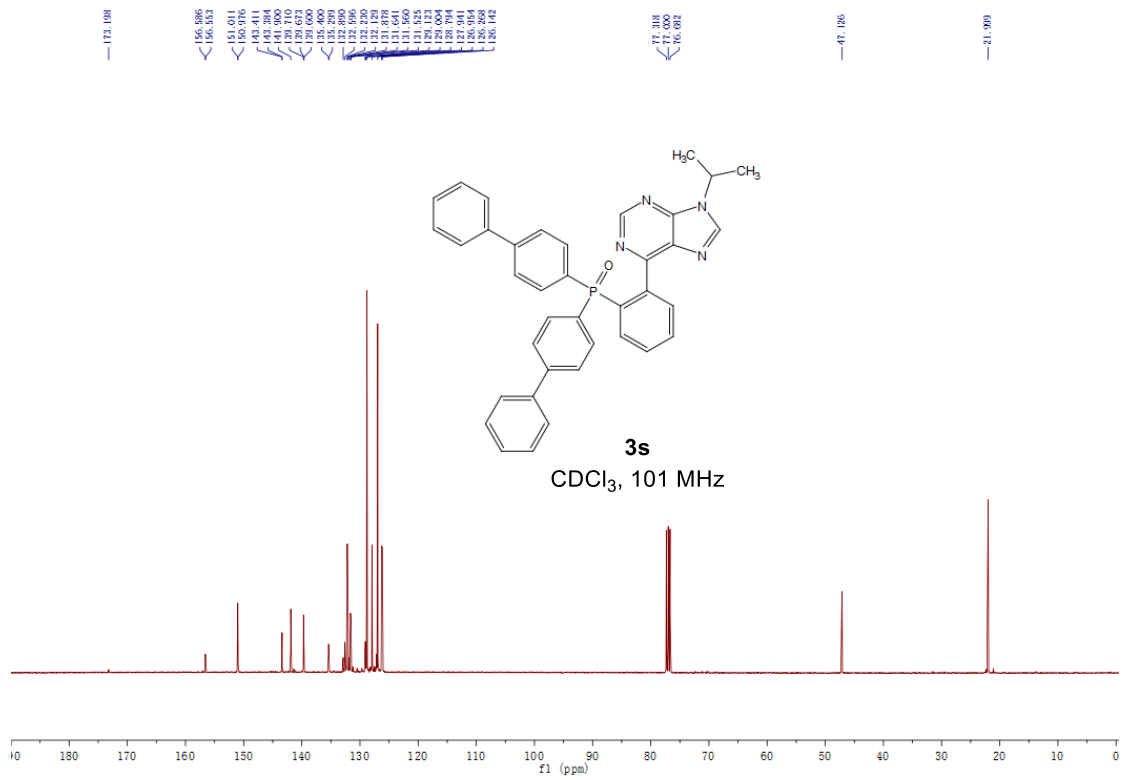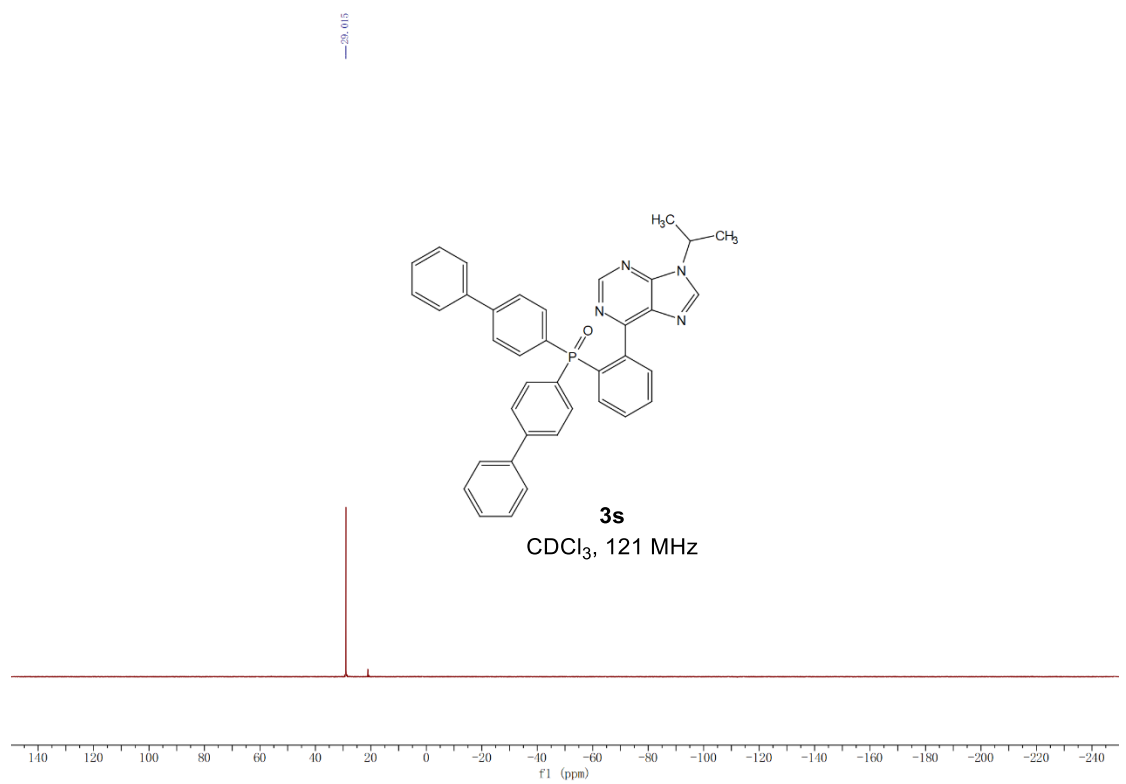

Ethyl (2-(9-isopropyl-9H-purin-6-yl)phenyl)(phenyl)phosphinate (**3t**)

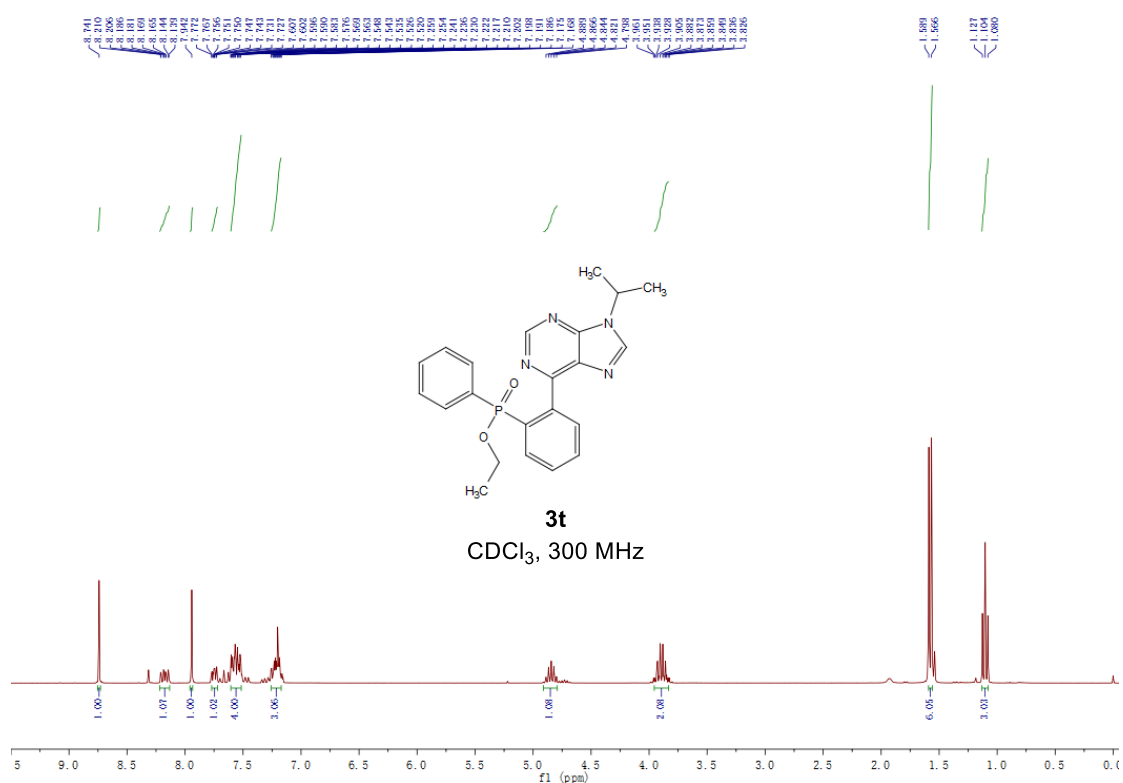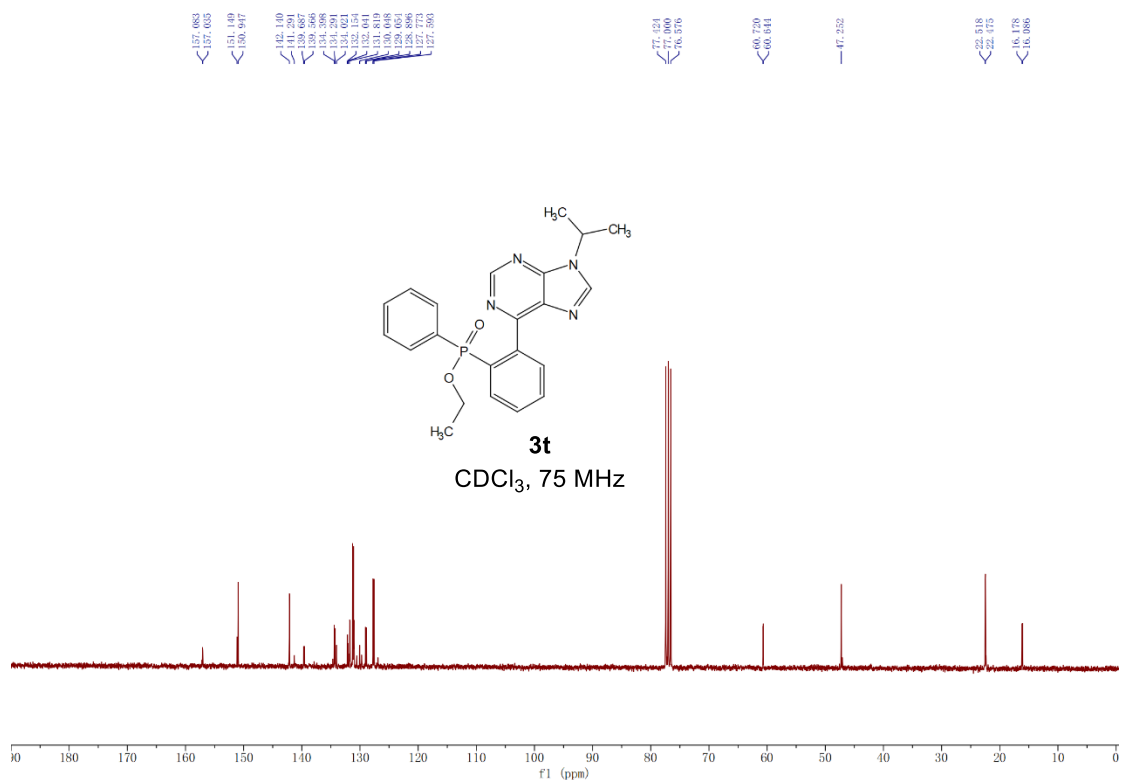

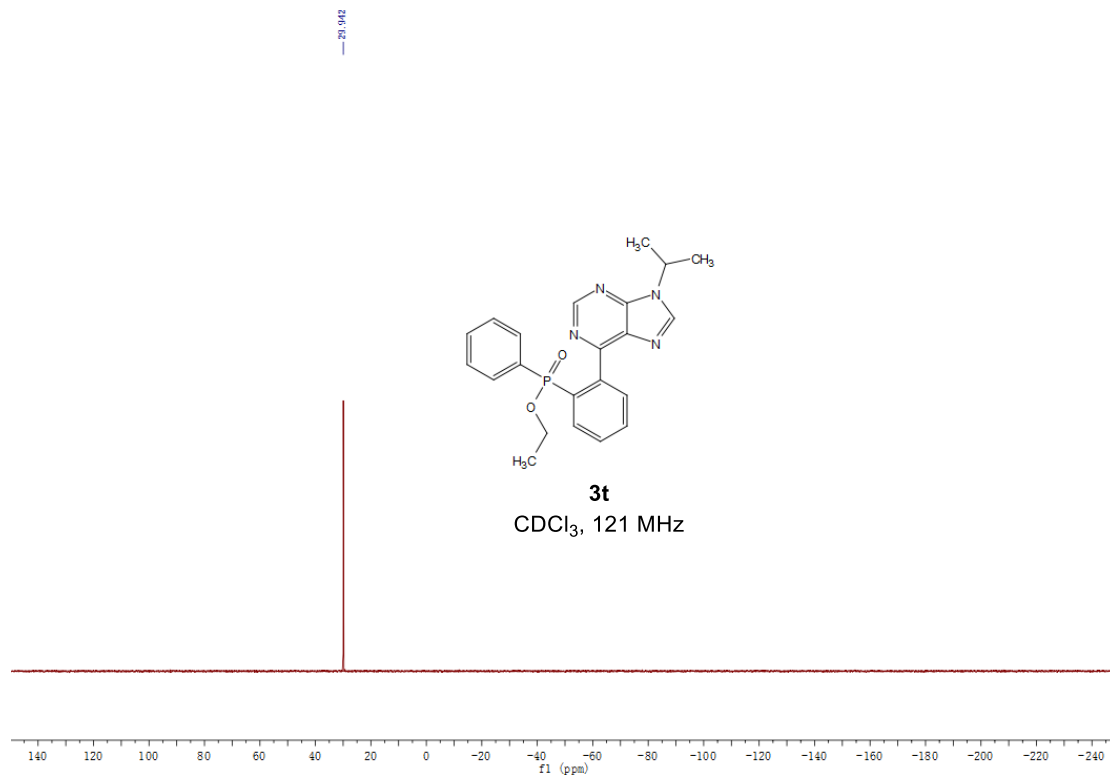

Isopropyl(2-(9-isopropyl-9H-purin-6-yl)phenyl)(phenyl)phosphine oxide (**3u**)

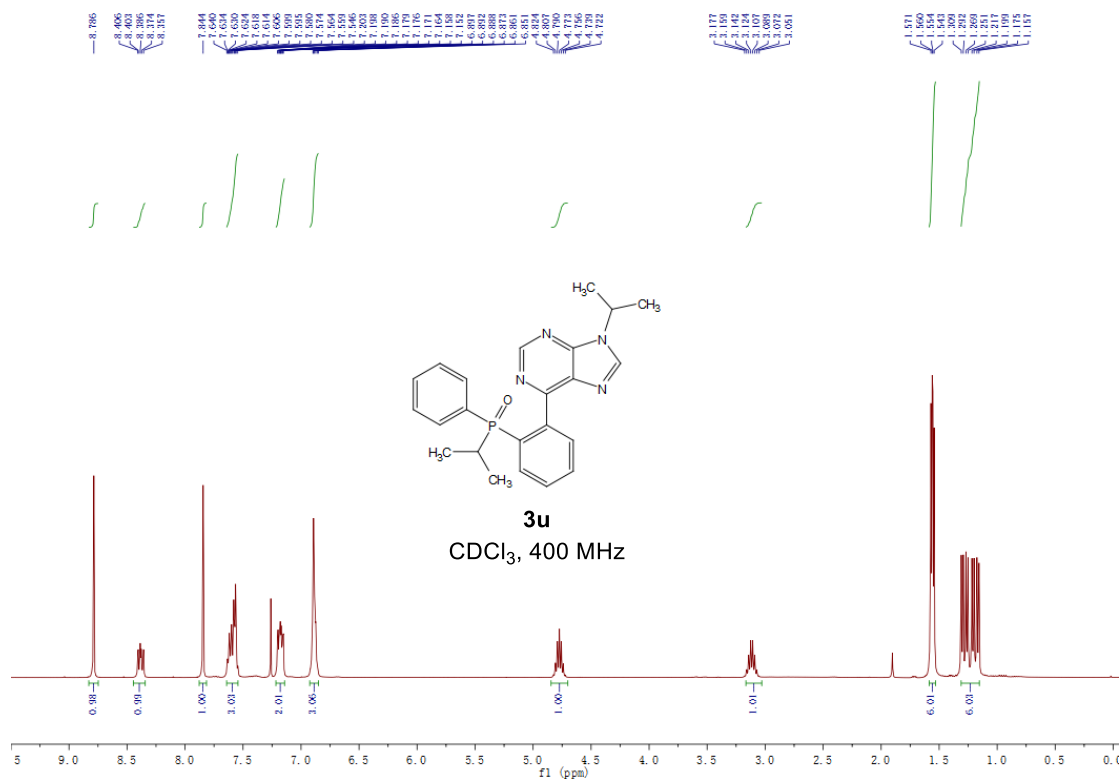

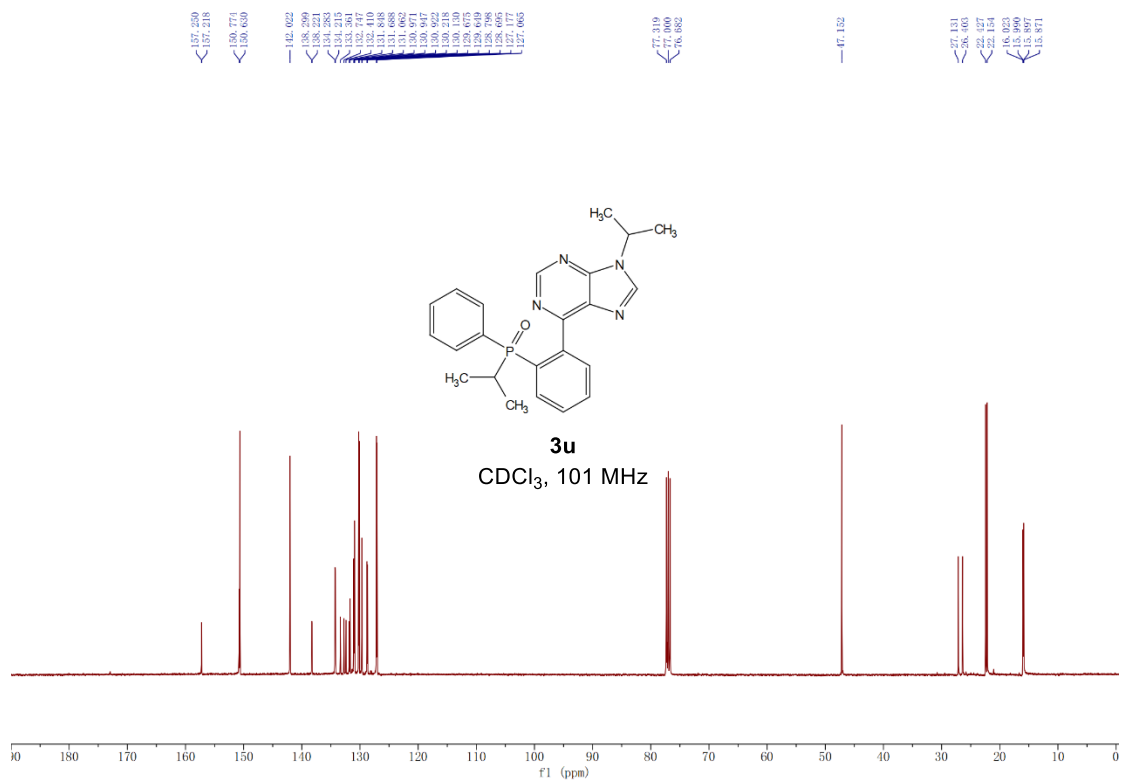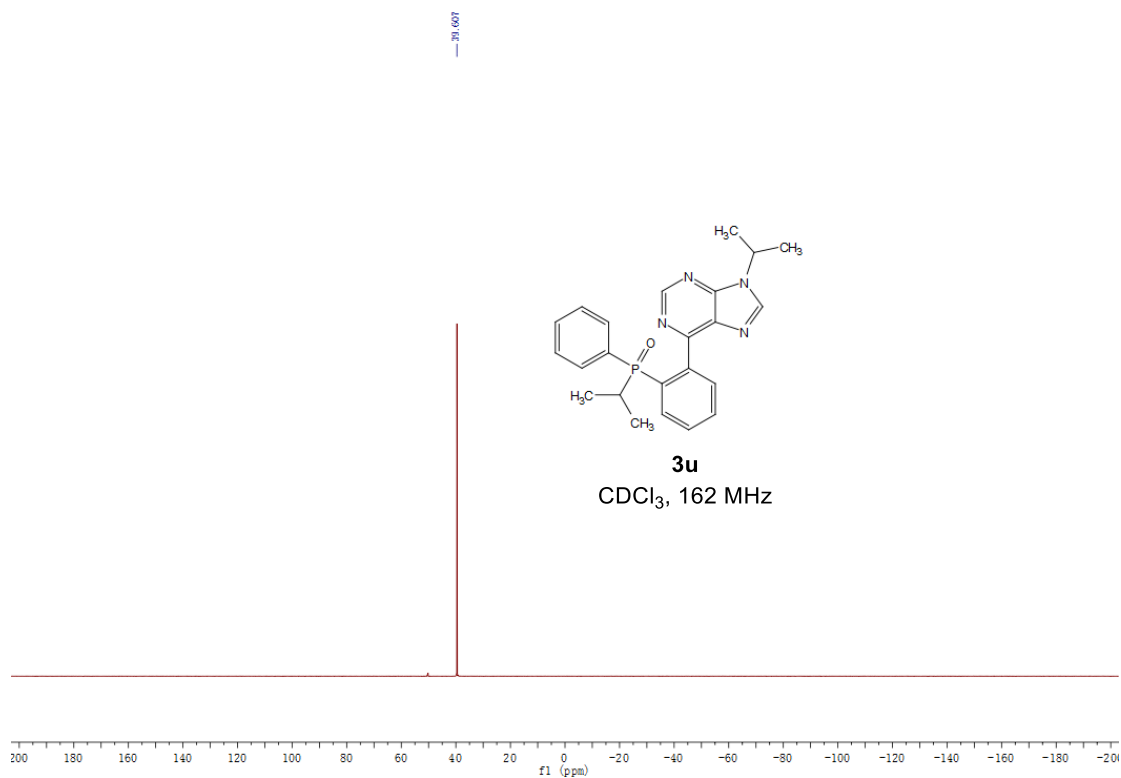



(2-(9-Isopropyl-9H-purin-6-yl)phenyl)di(thiophen-2-yl)phosphine oxide (**3v**)

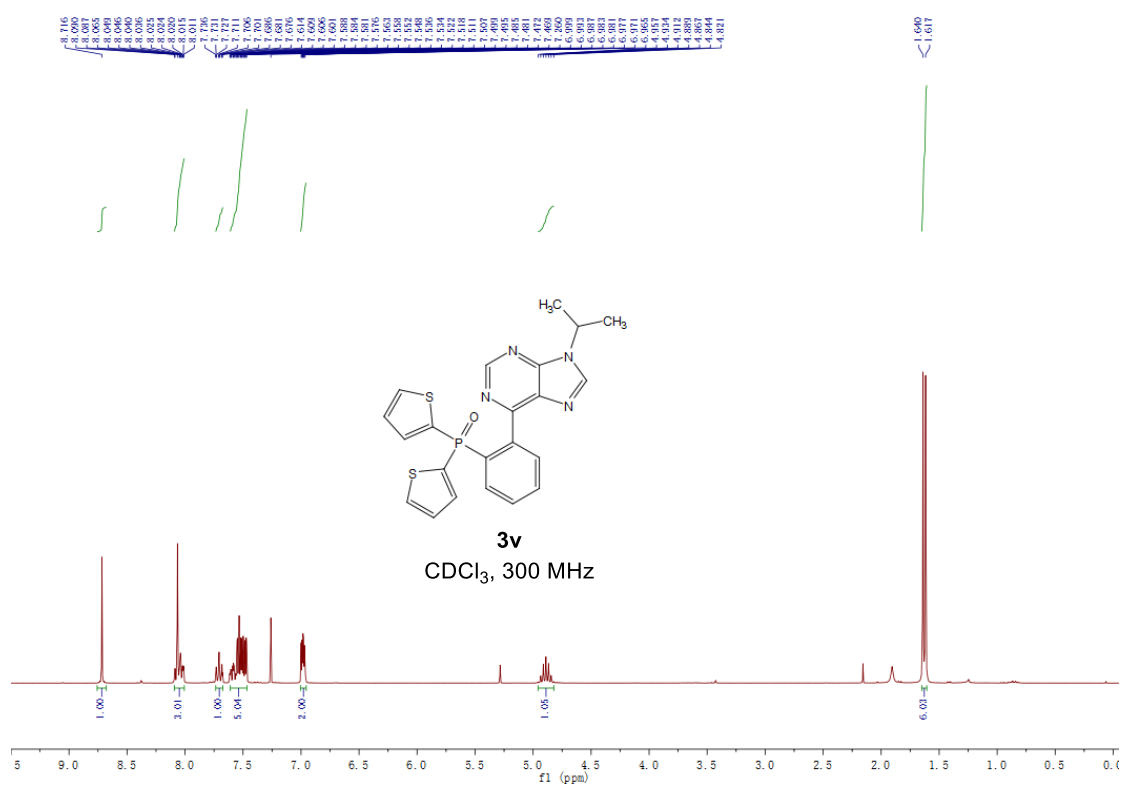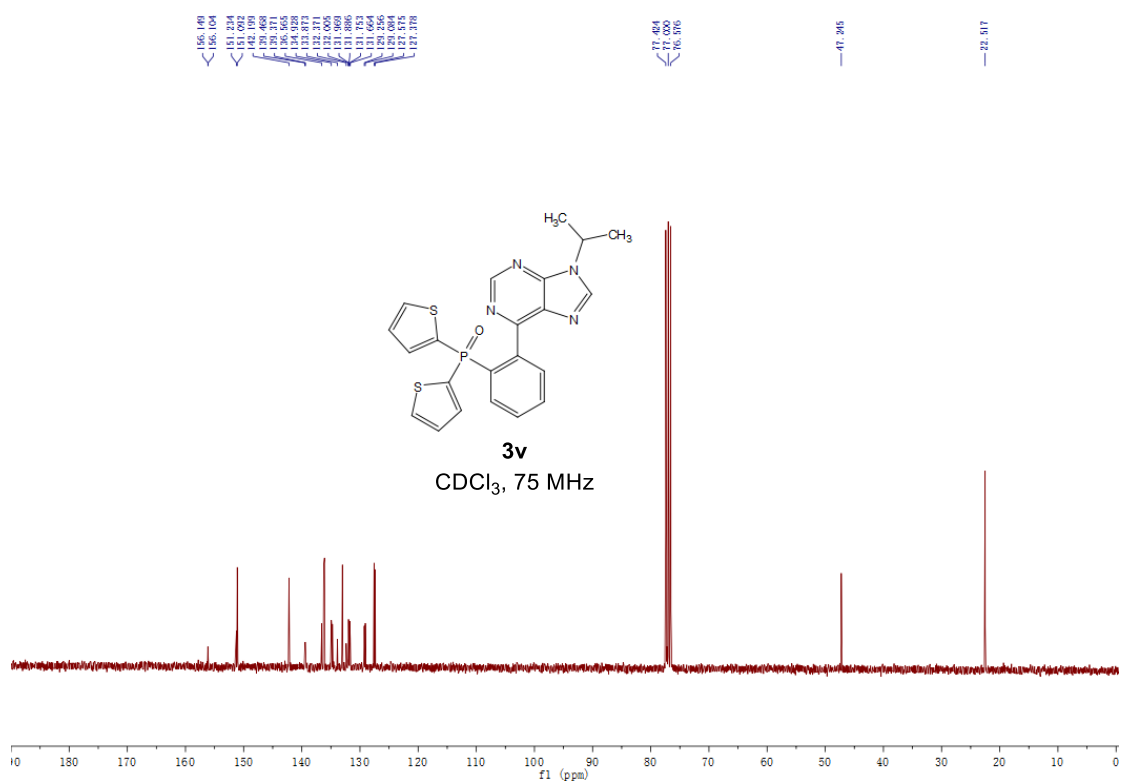

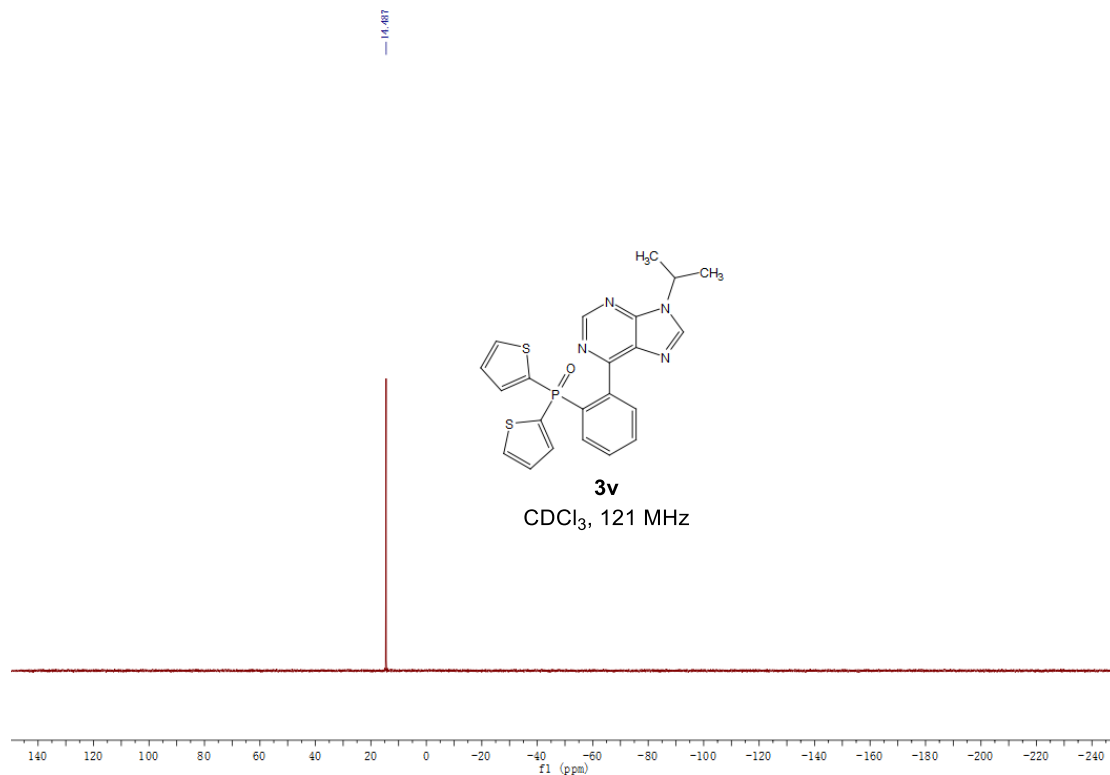

(2-(9-Isopropyl-9H-purin-6-yl)phenyl)dimethylphosphine oxide (**3w**)

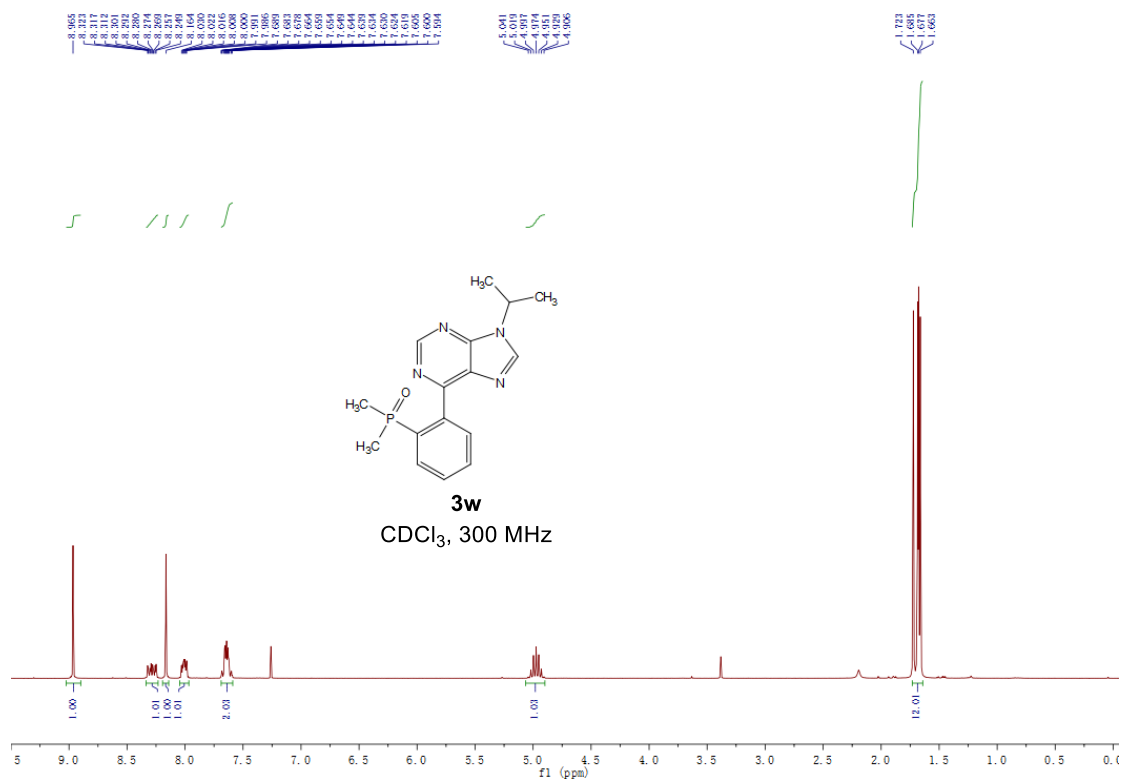

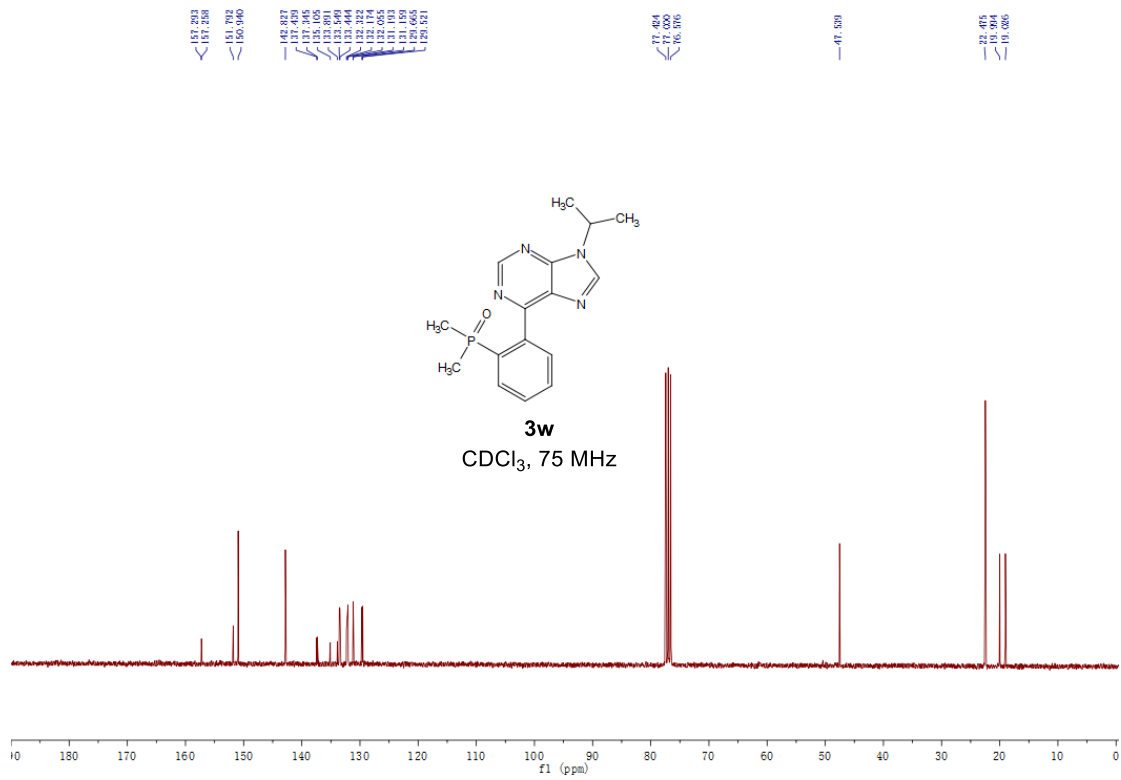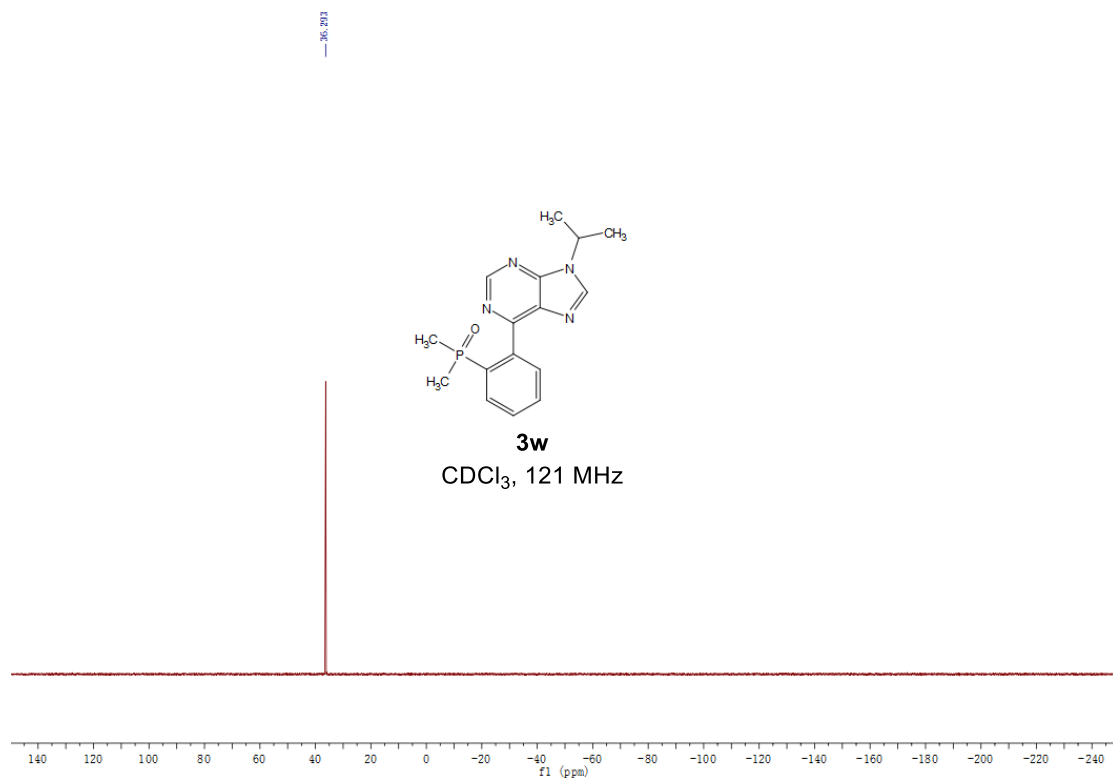

7-Chloro-5-(2-(diphenylphosphoryl)phenyl)-1-methyl-1,3-dihydro-2H-benzo[e][1,4]diazepin-2-one (**3x**)

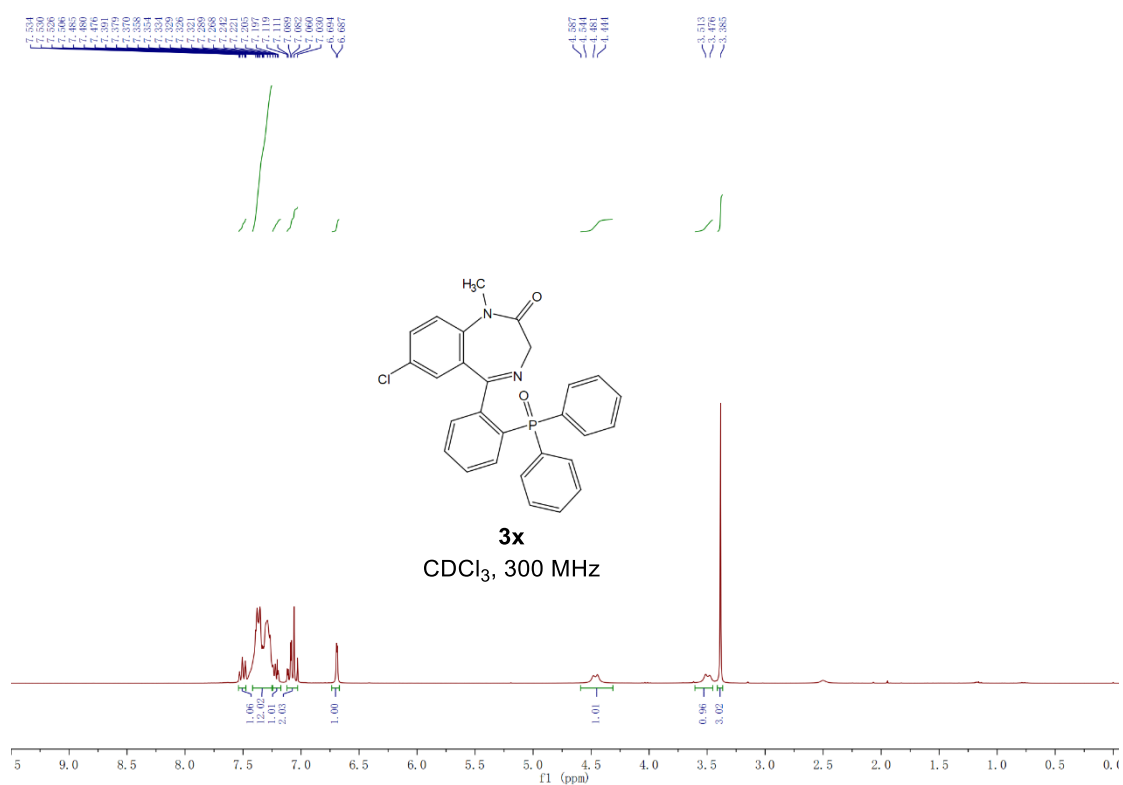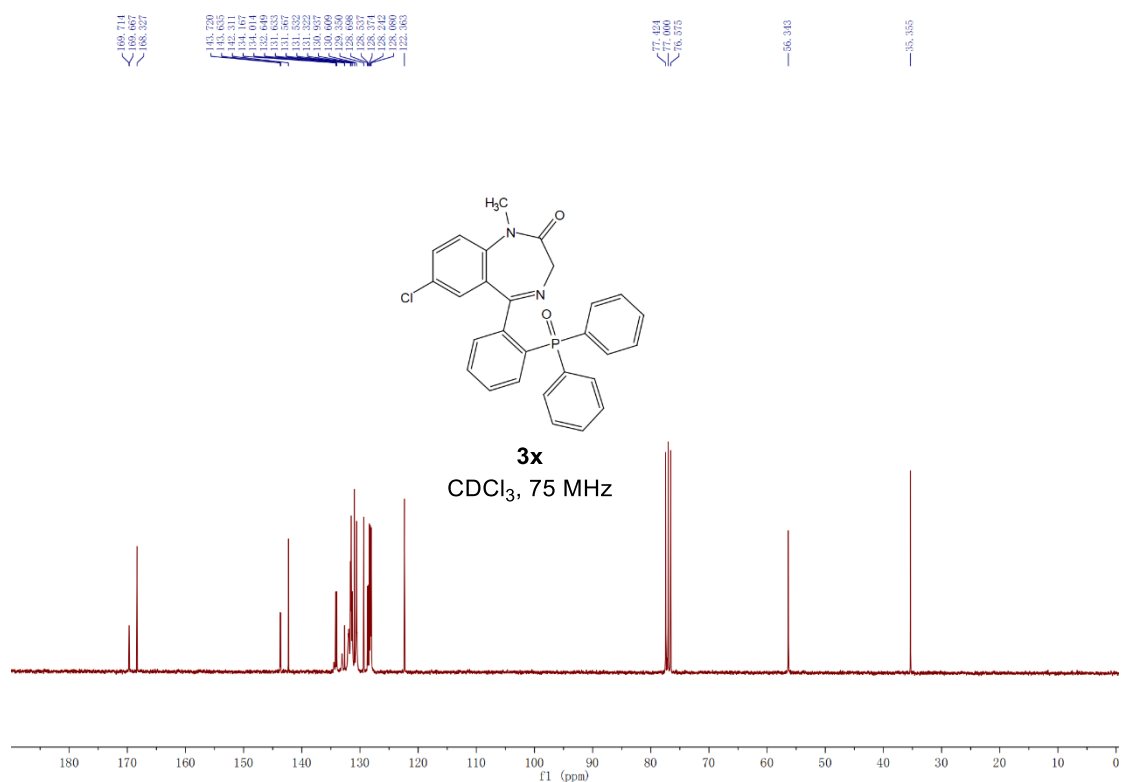

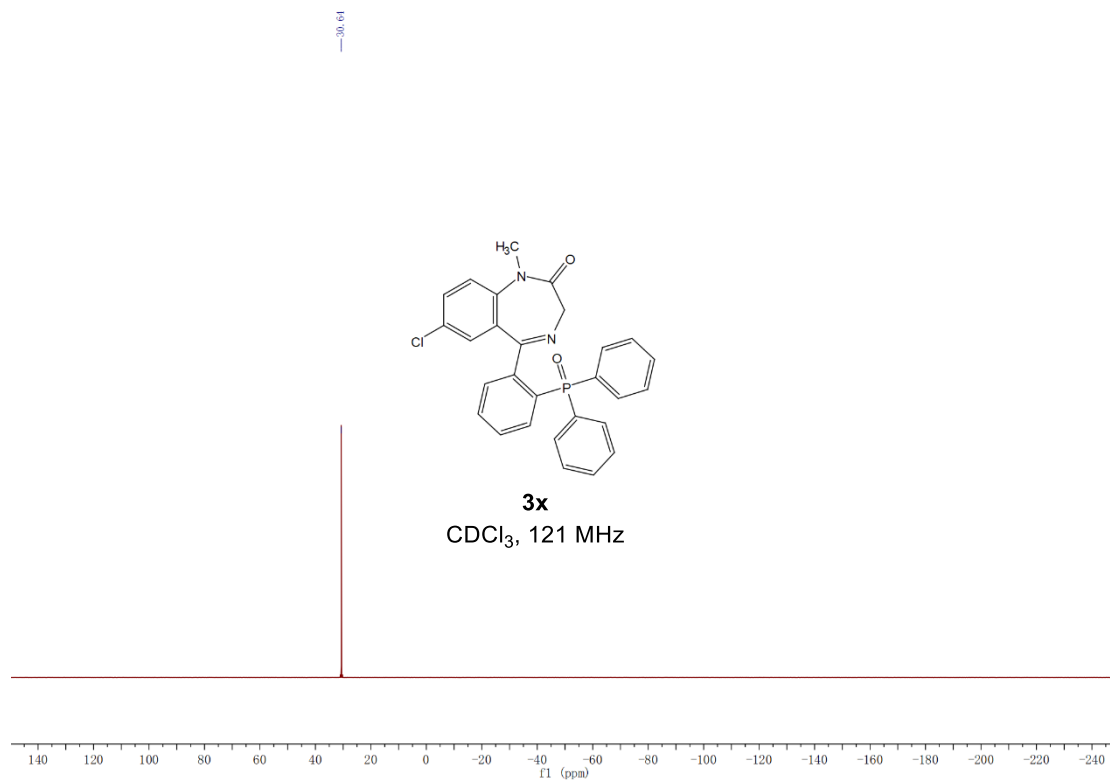

7-Chloro-5-(2-(dimethylphosphoryl)phenyl)-1-methyl-1,3-dihydro-2H-benzo[e][1,4]diazepin-2-one (**3y**)

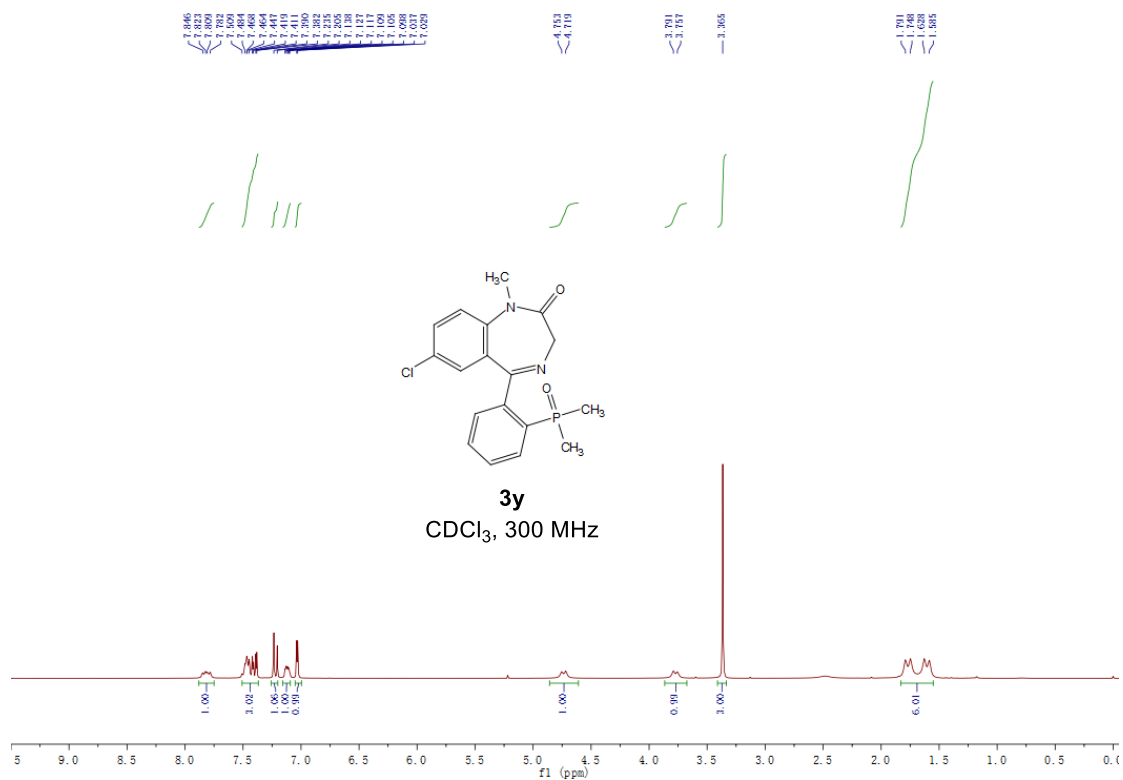

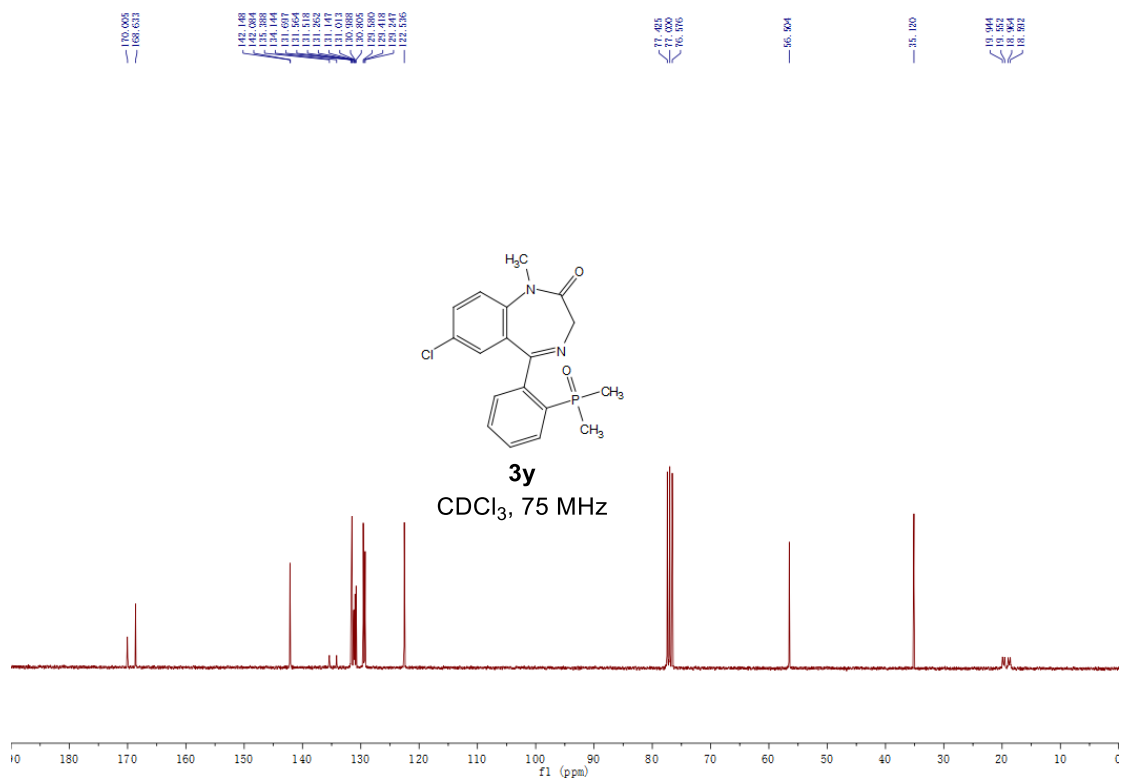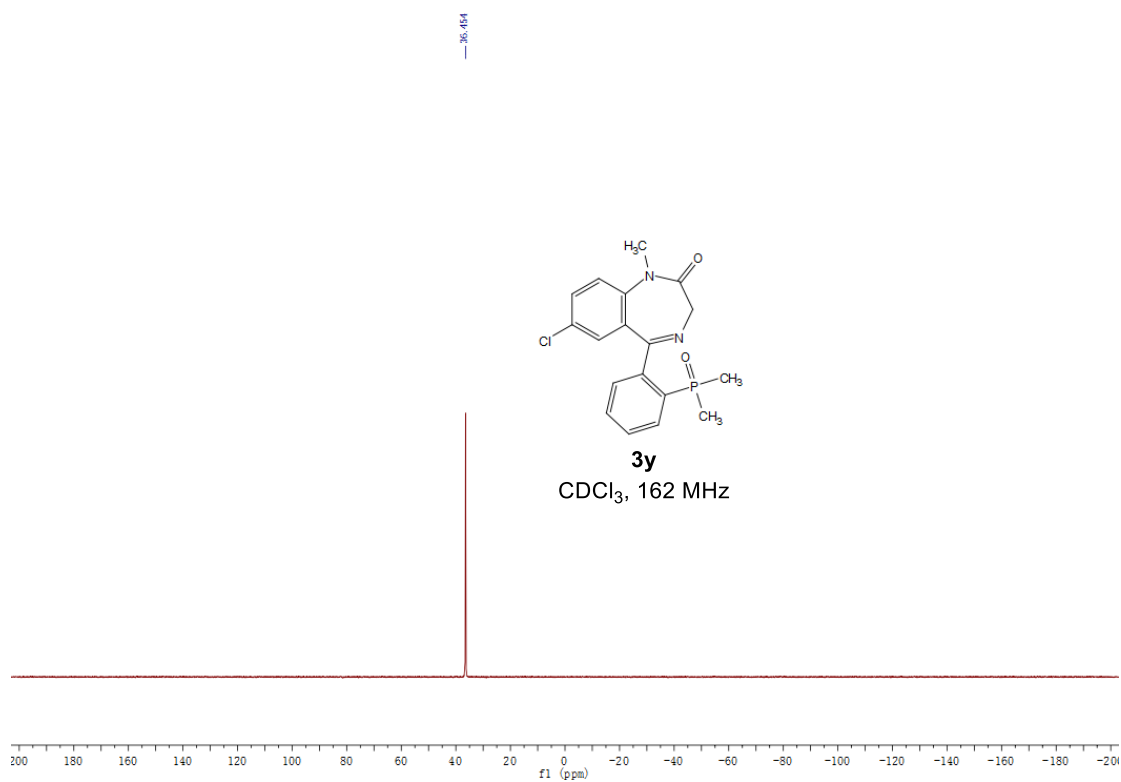

Methyl 3-(4-(2-(diphenylphosphoryl)phenyl)-5-phenyloxazol-2-yl)propanoate (**3z**)

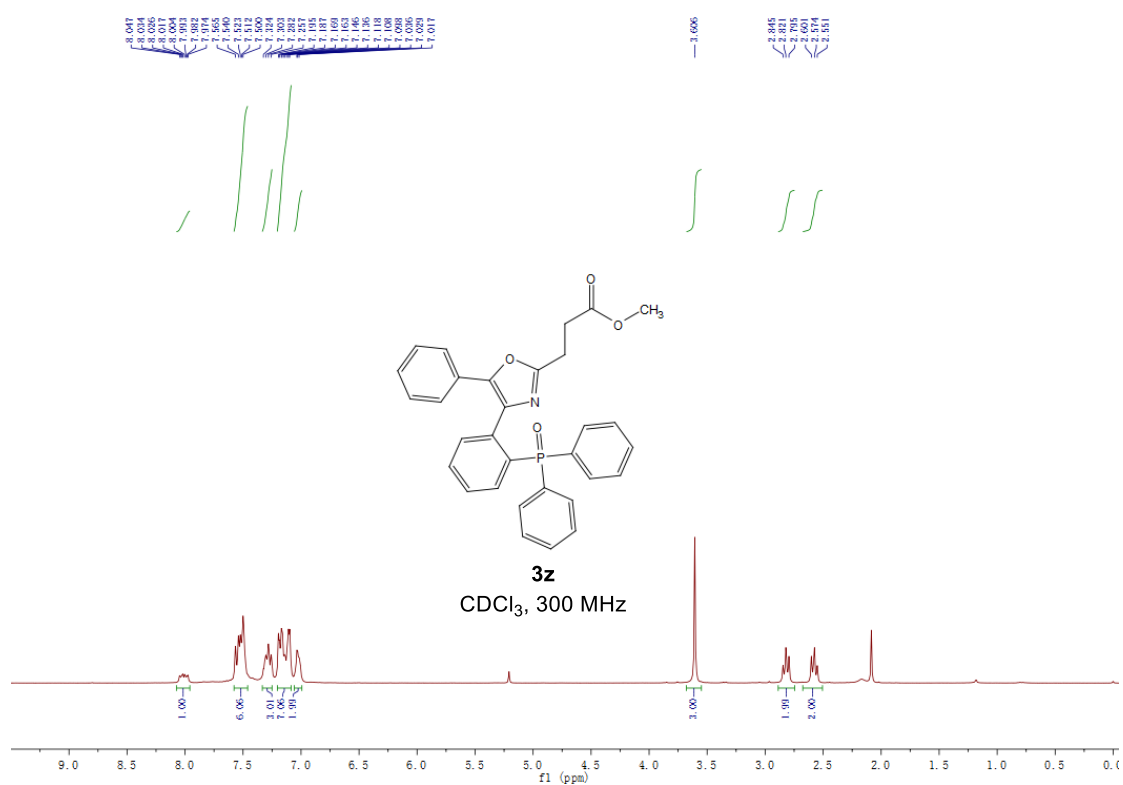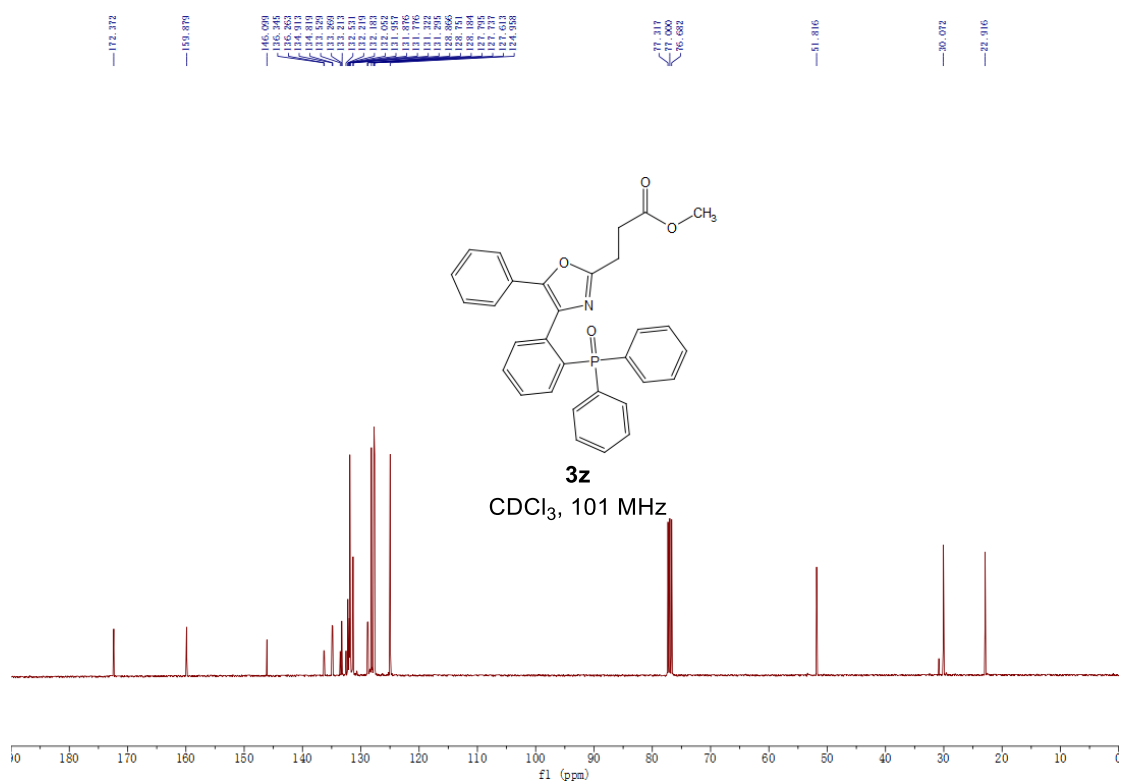

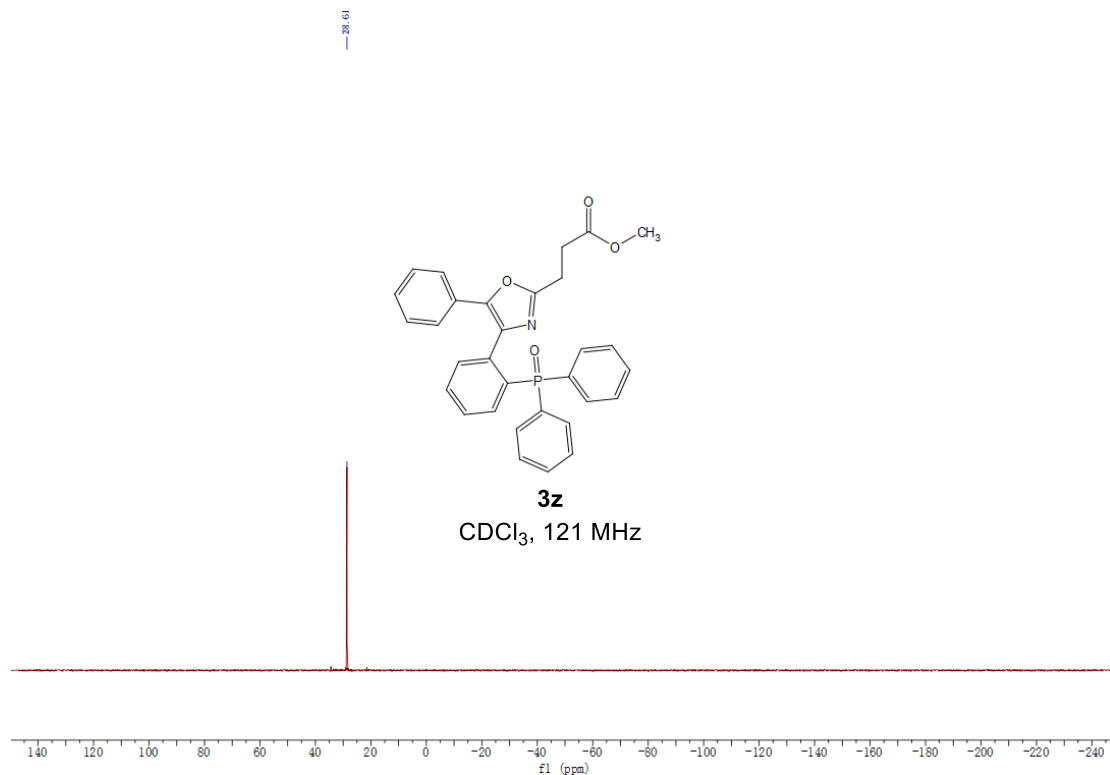

(2-(9-((3aR,4R,6R,6aR)-6-(Hydroxymethyl)-2,2-dimethyltetrahydrofuro[3,4-d][1,3]dioxol-4-yl)-9H-purin-6-yl)phenyl)diphenylphosphine oxide (**3aa**)

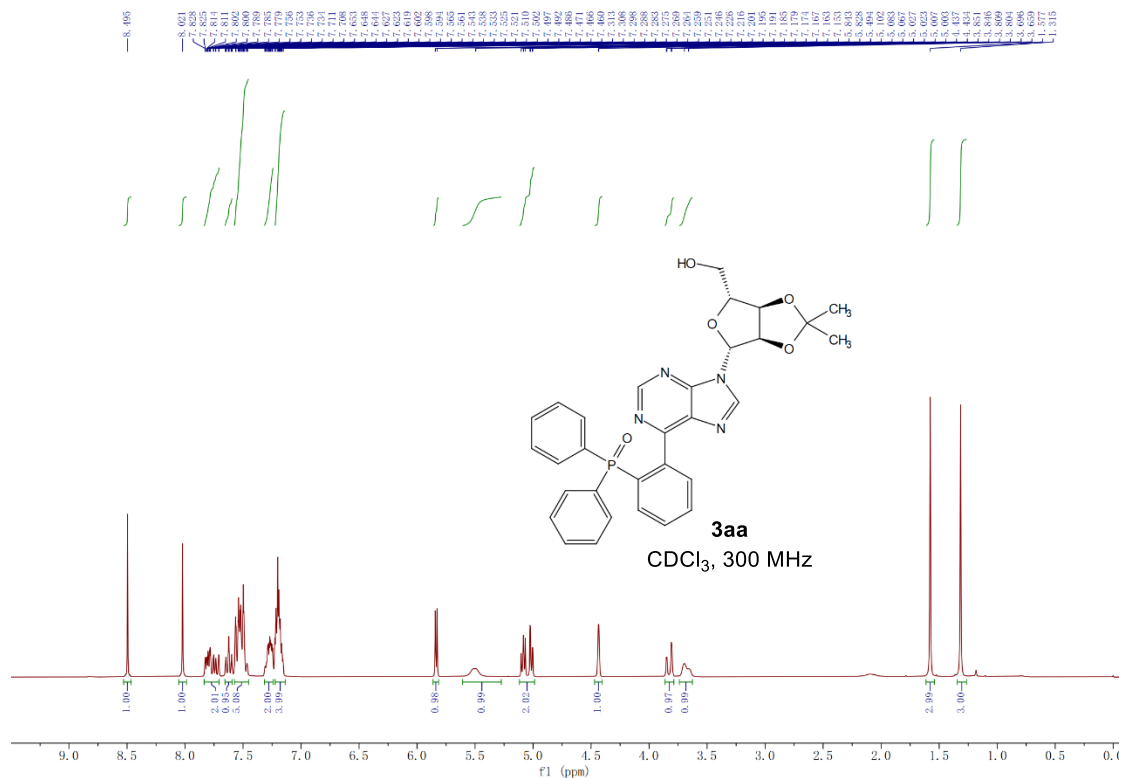



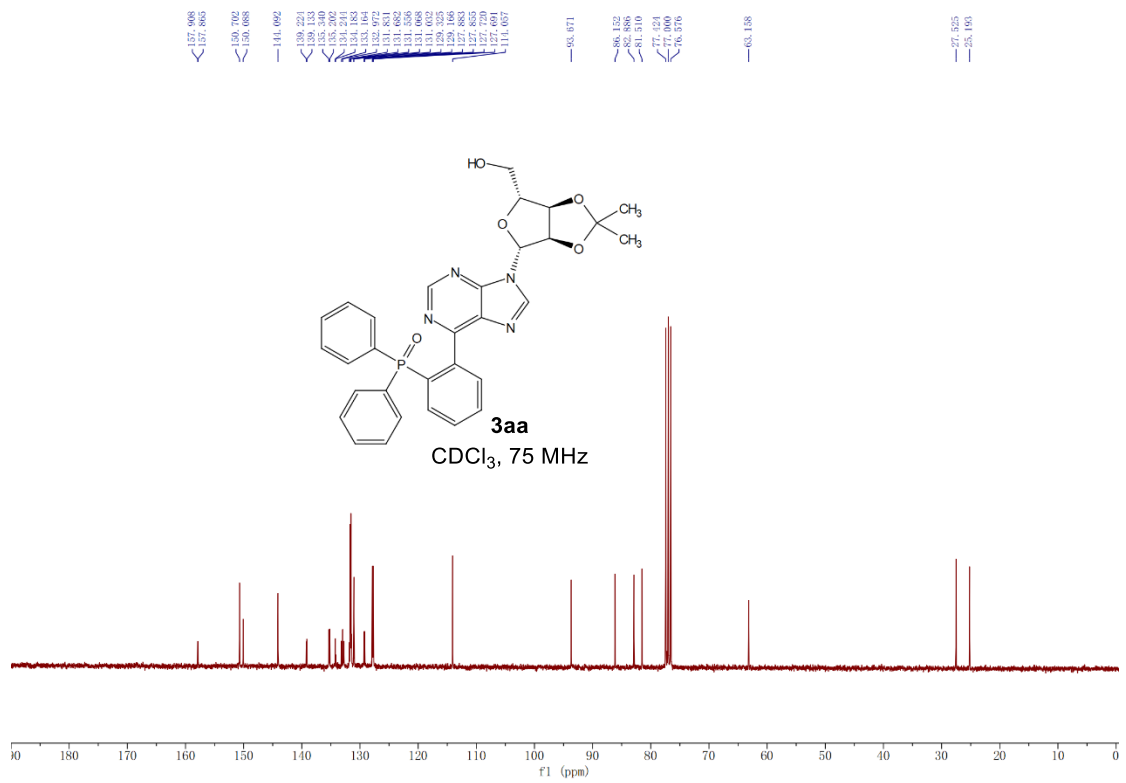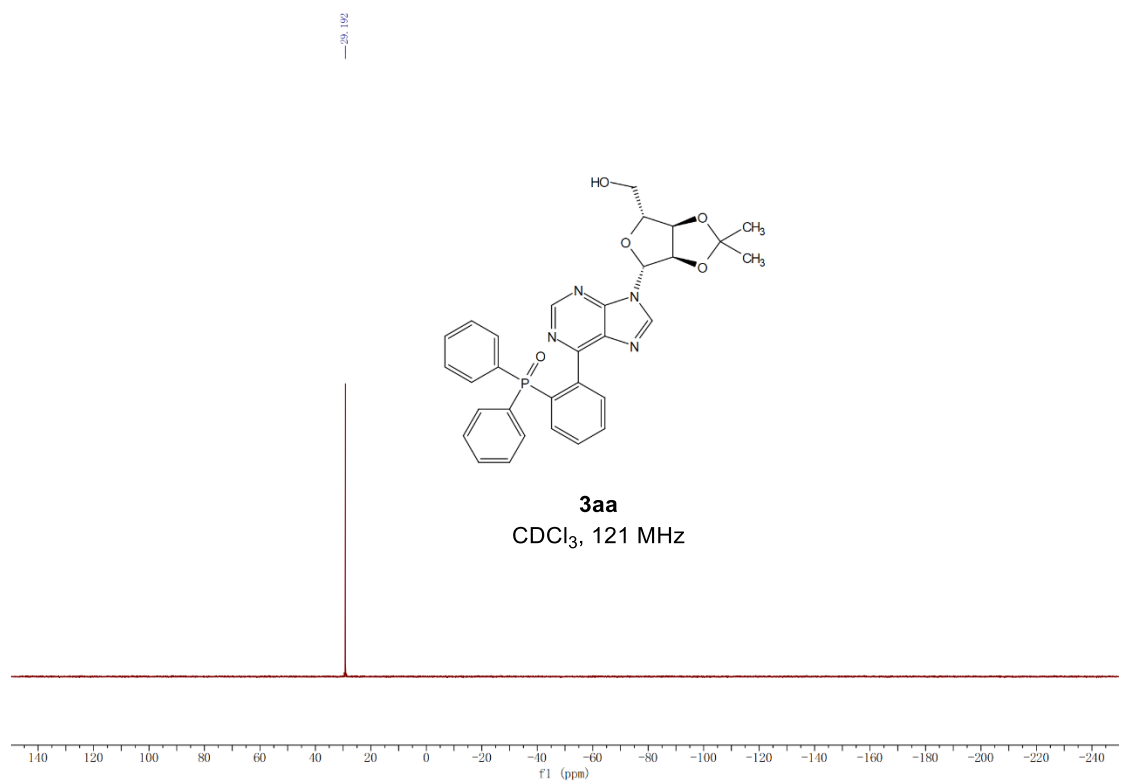

(4-(9-Isopropyl-9H-purin-6-yl)phenyl)diphenylphosphine oxide (**4a**)

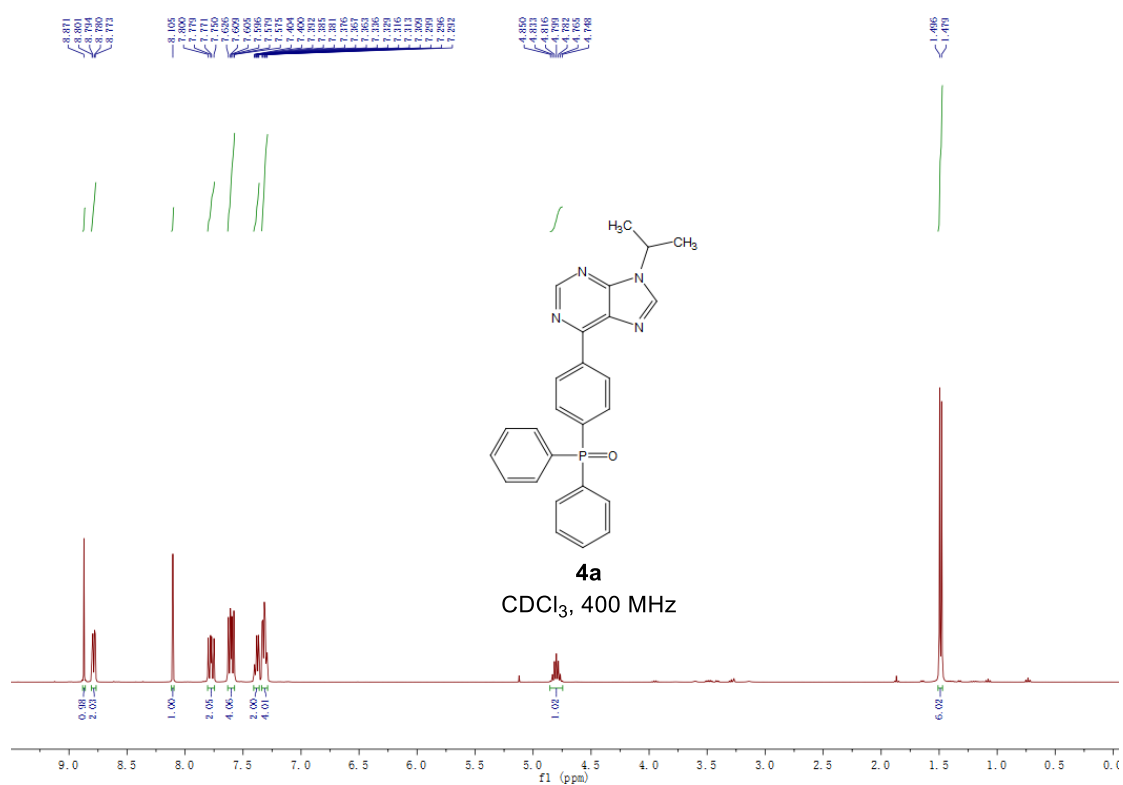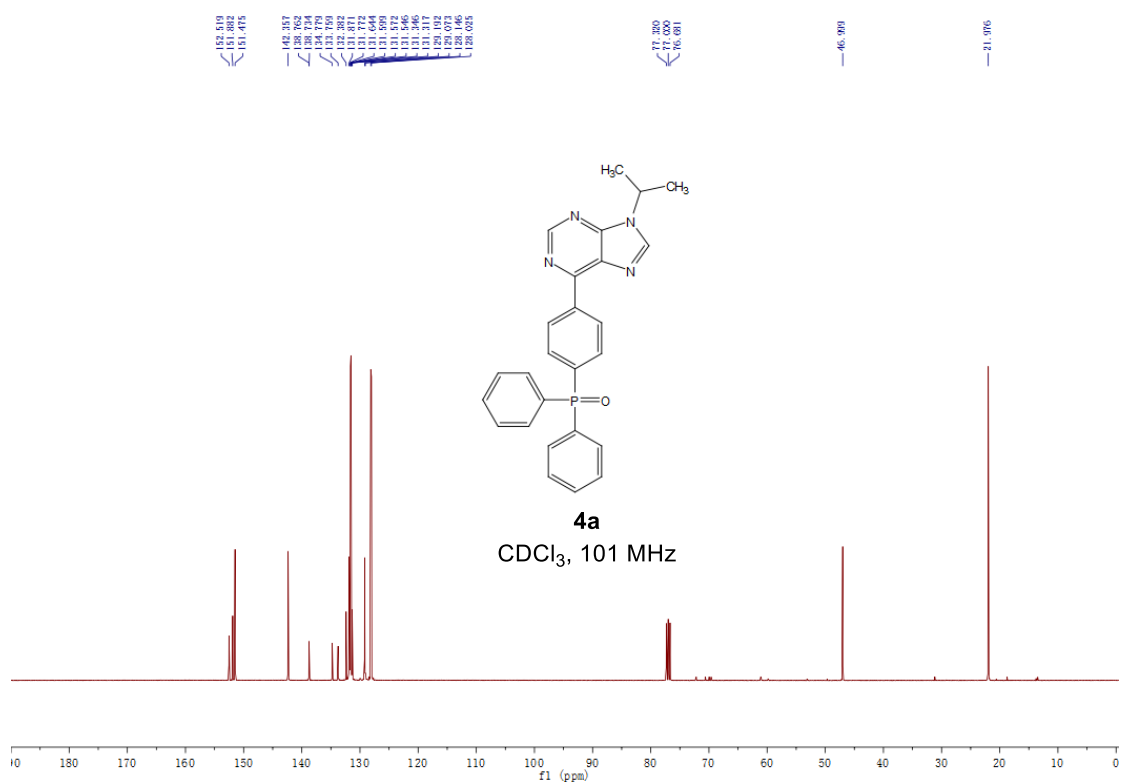

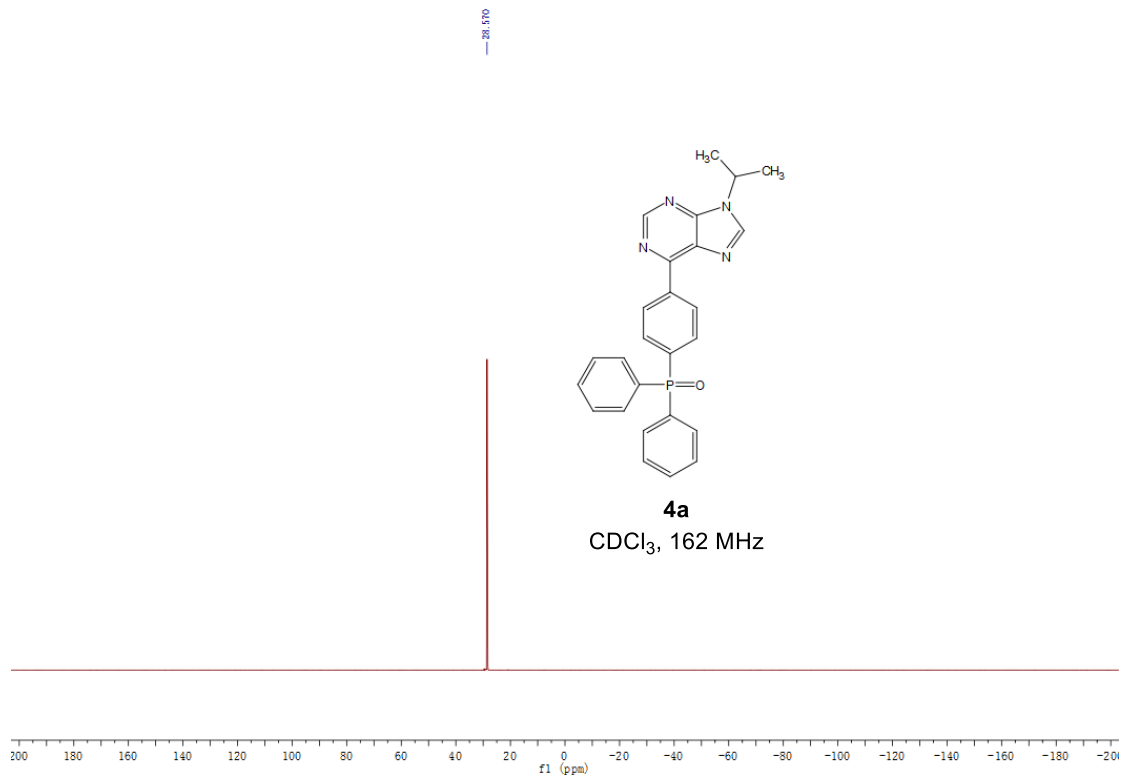

(4-(9-Methyl-9H-purin-6-yl)phenyl)diphenylphosphine oxide (**4b**)

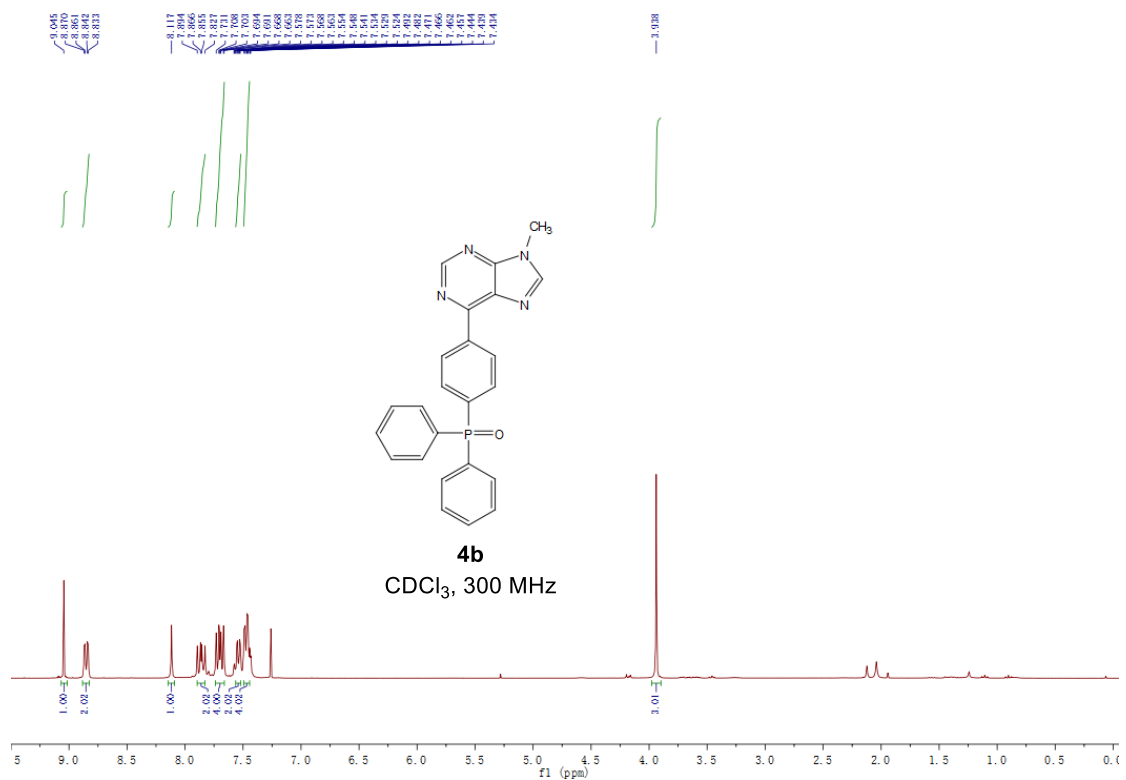

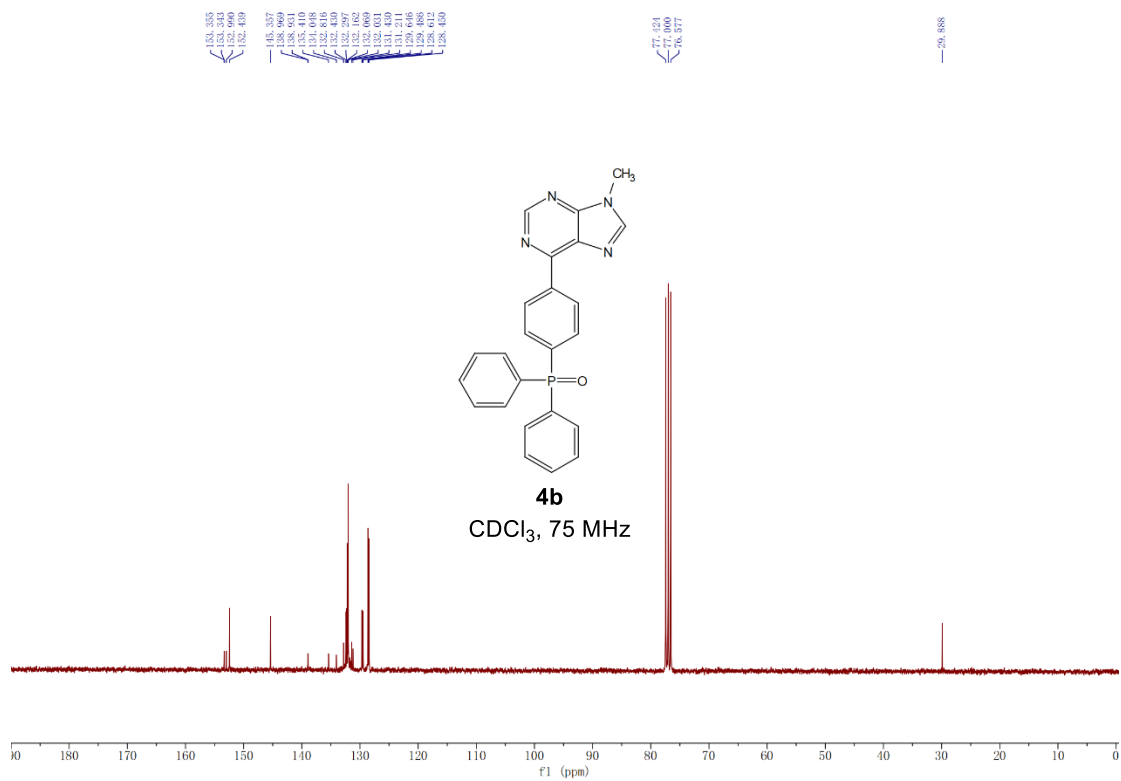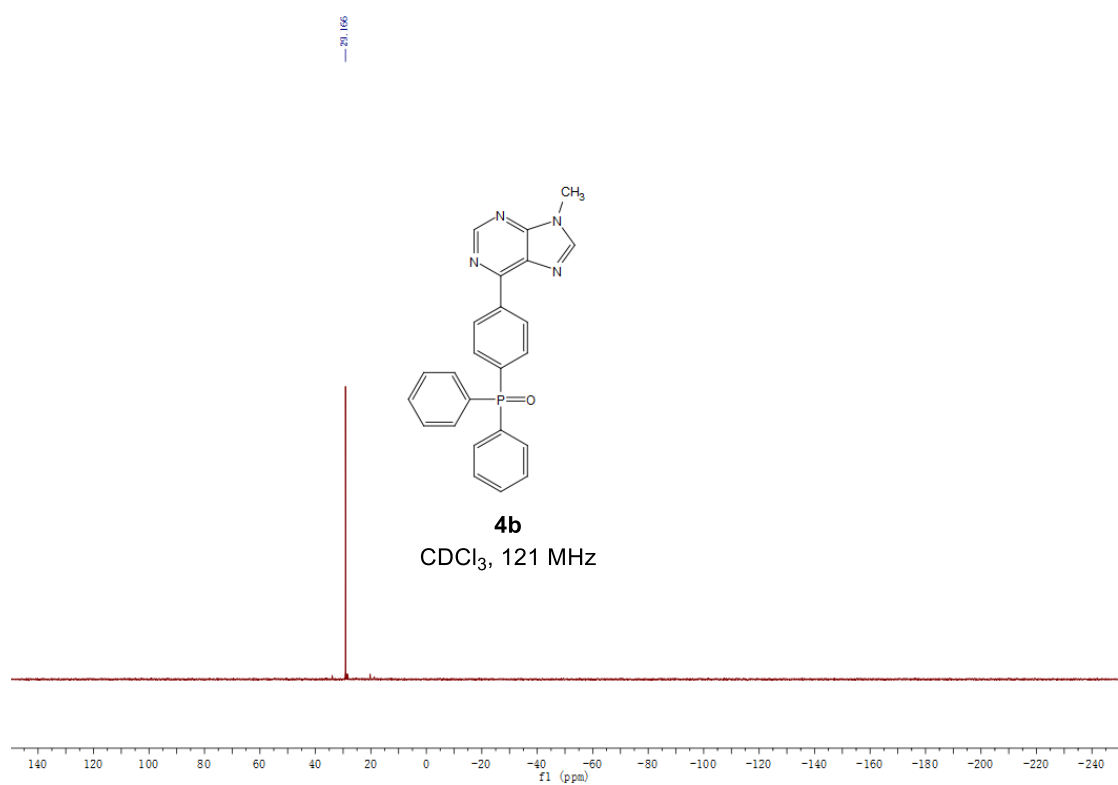

(4-(9-Benzyl-9H-purin-6-yl)phenyl)diphenylphosphine oxide (**4c**)

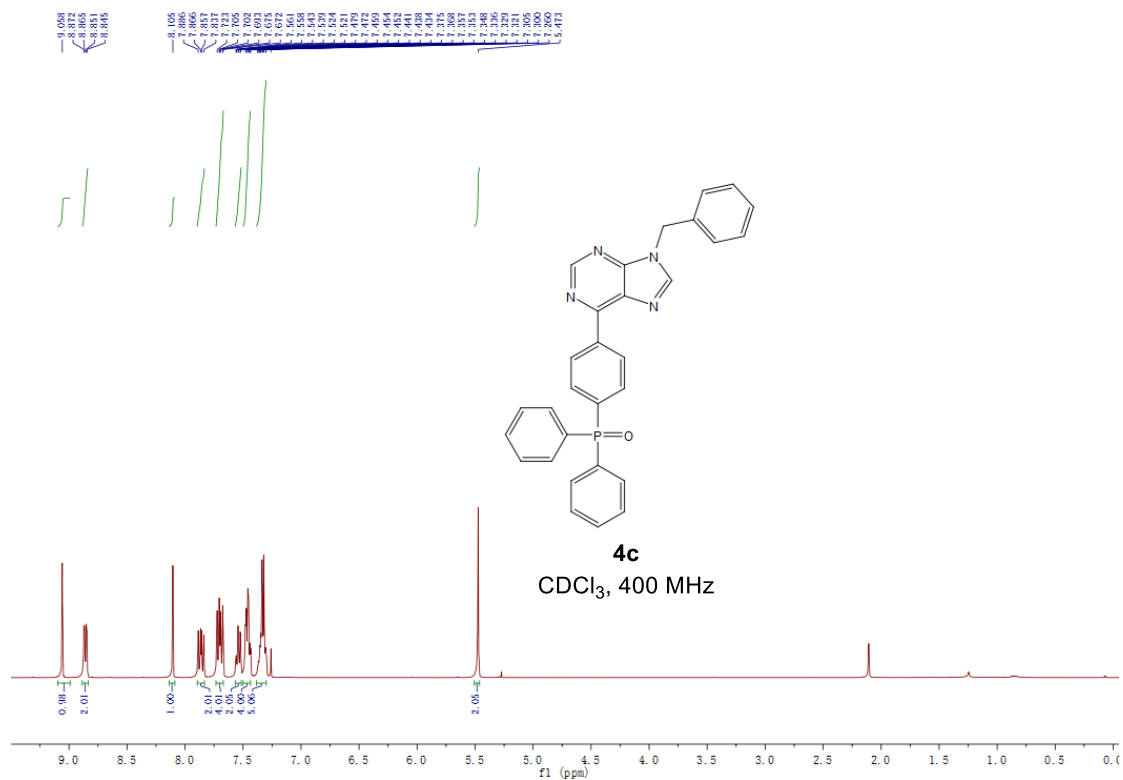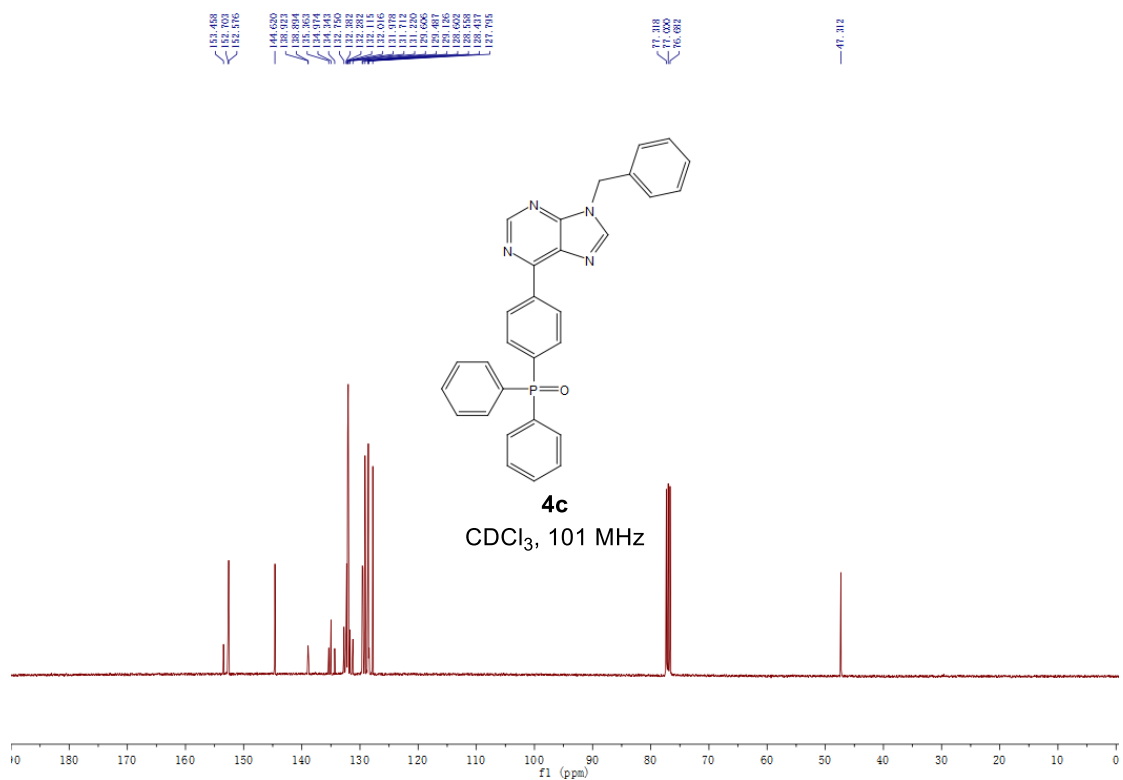

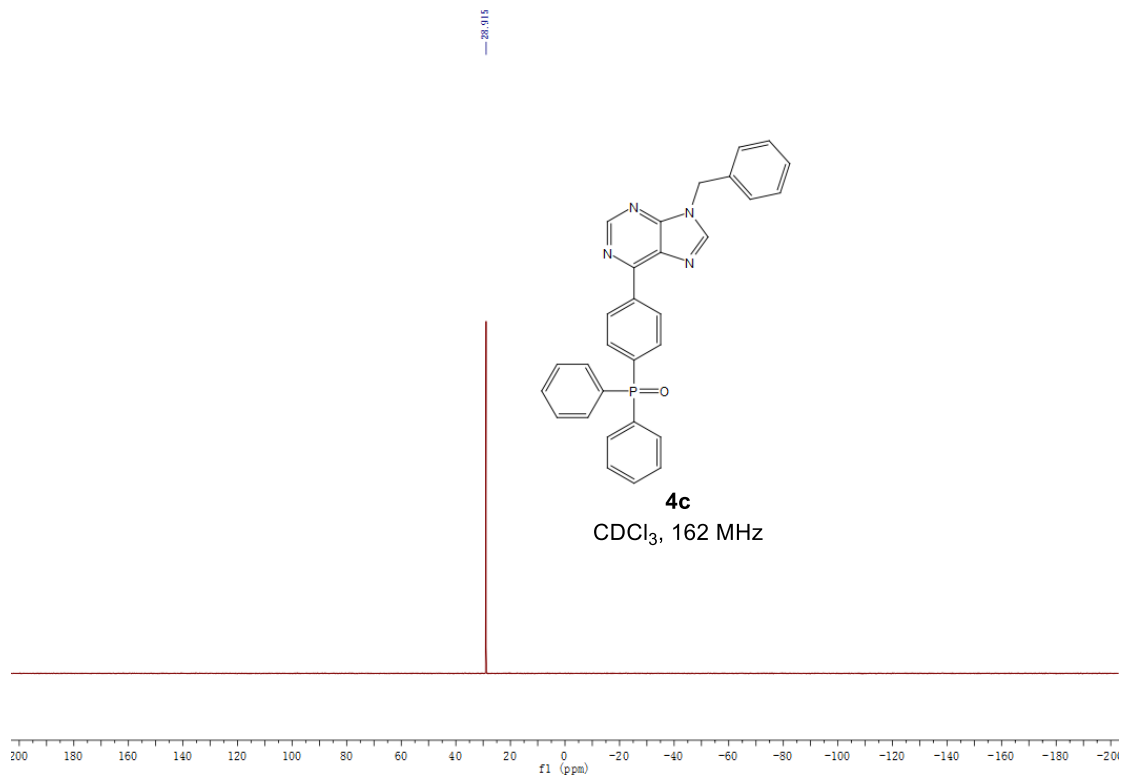

(2R,3R,4R,5R)-2-(Acetoxymethyl)-5-(6-(4-(diphenylphosphoryl)phenyl)-9H-purin-9-yl)tetrahydrofuran-3,4-diyl diacetate (**4d**)

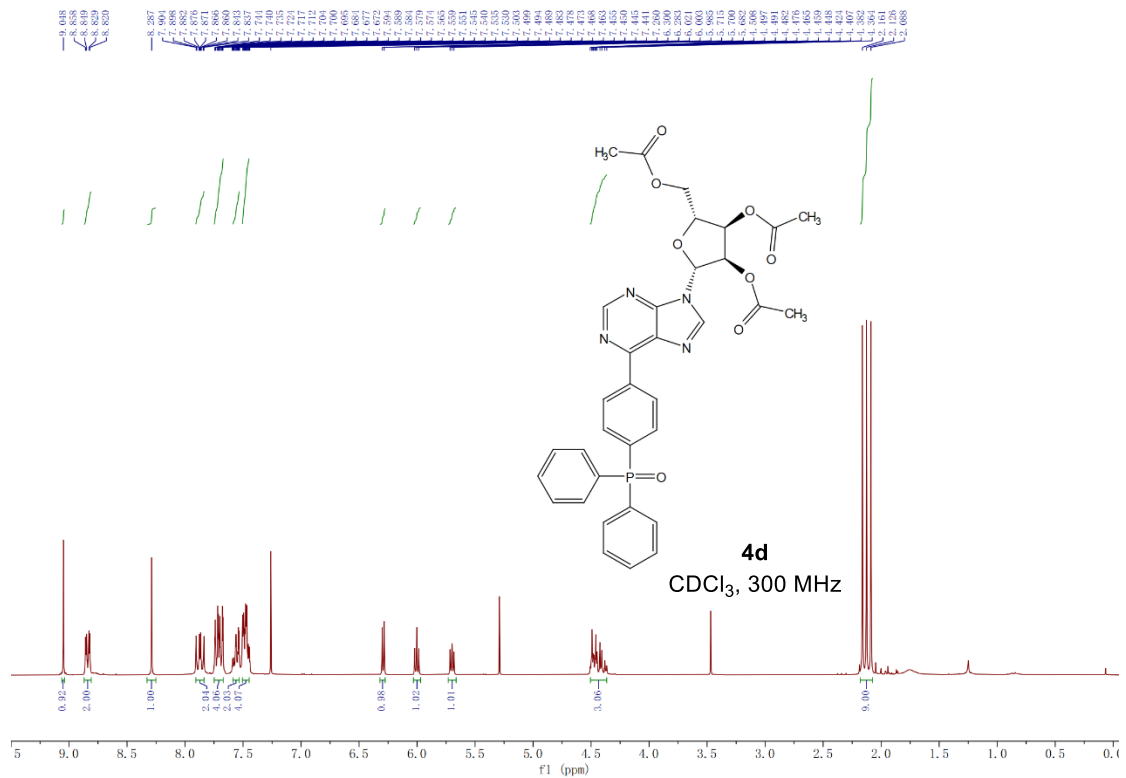

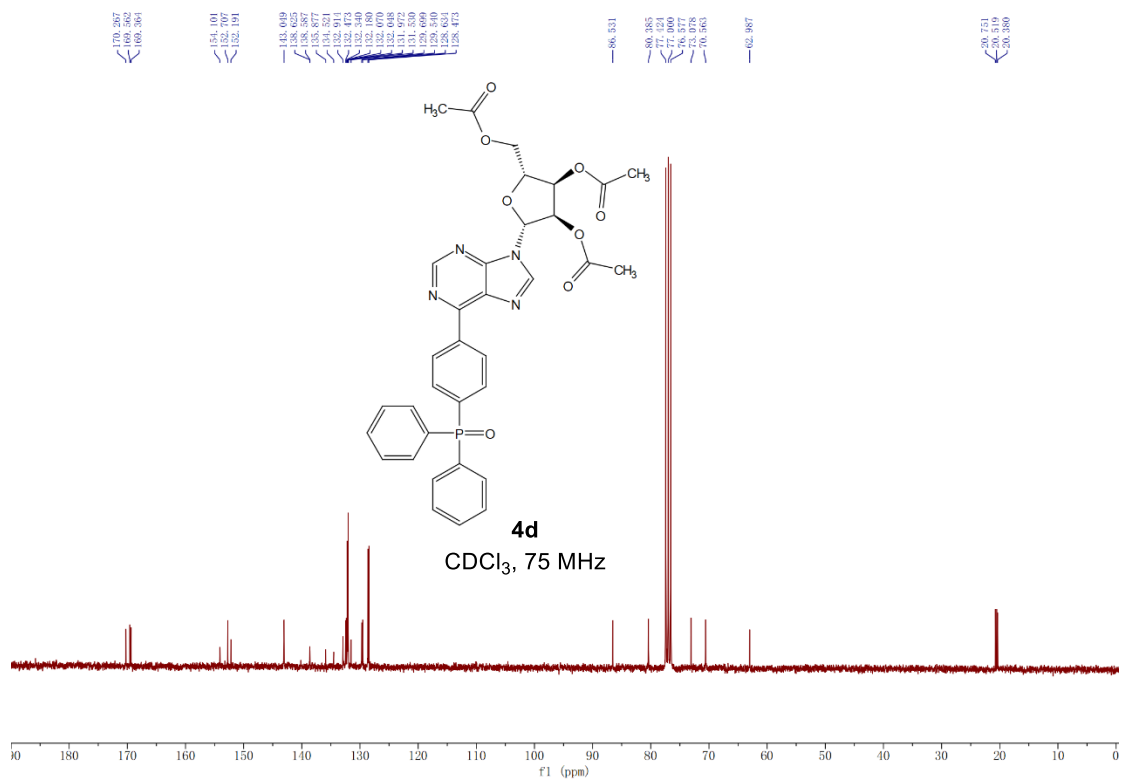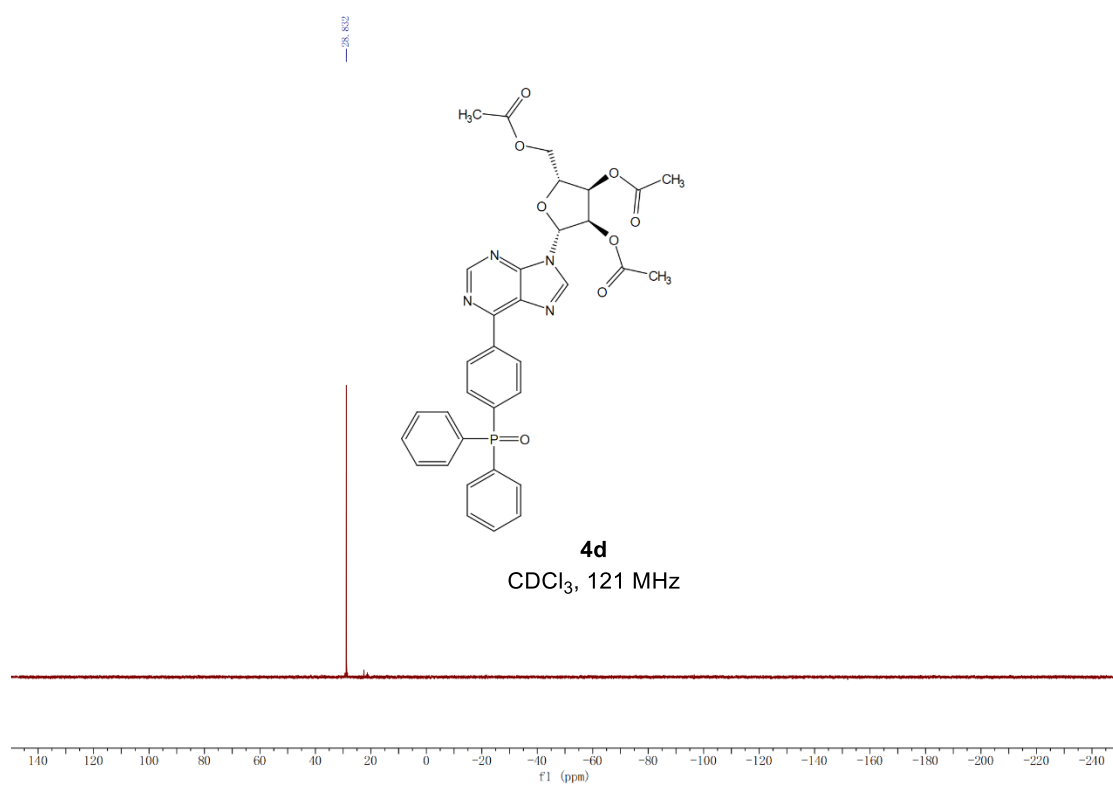

(2-Fluoro-4-(9-isopropyl-9H-purin-6-yl)phenyl)diphenylphosphine oxide (**4e**)

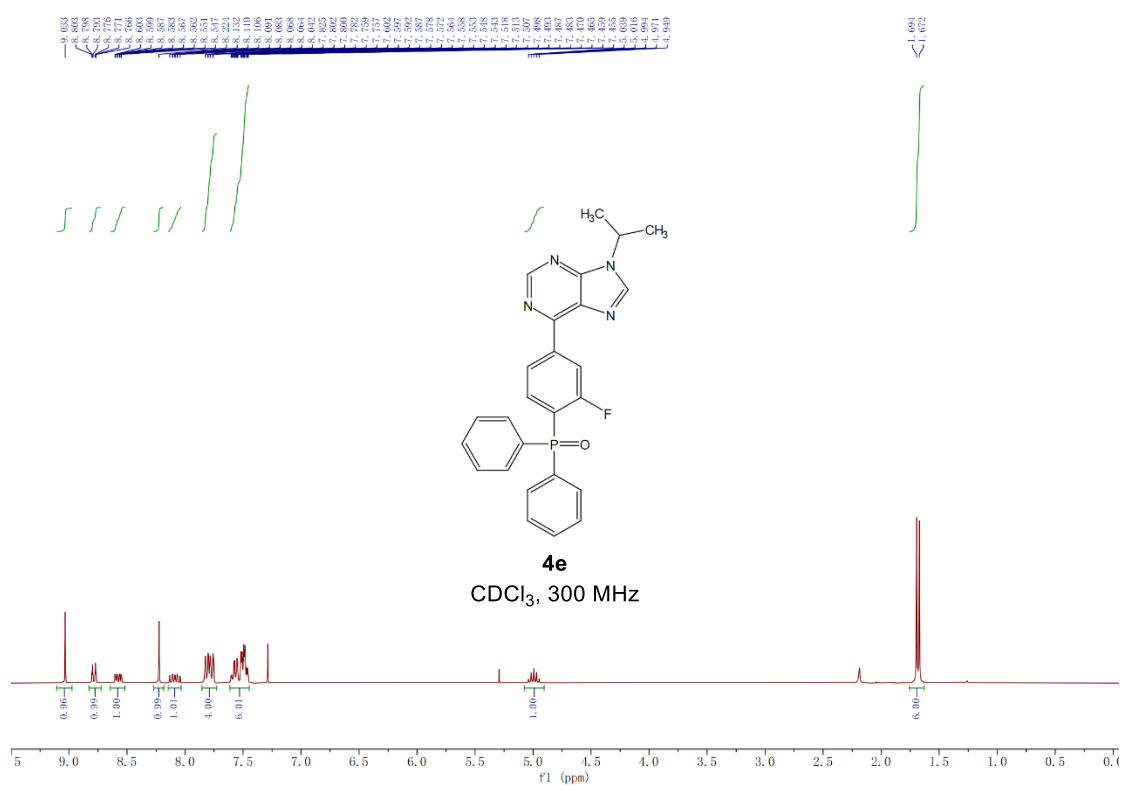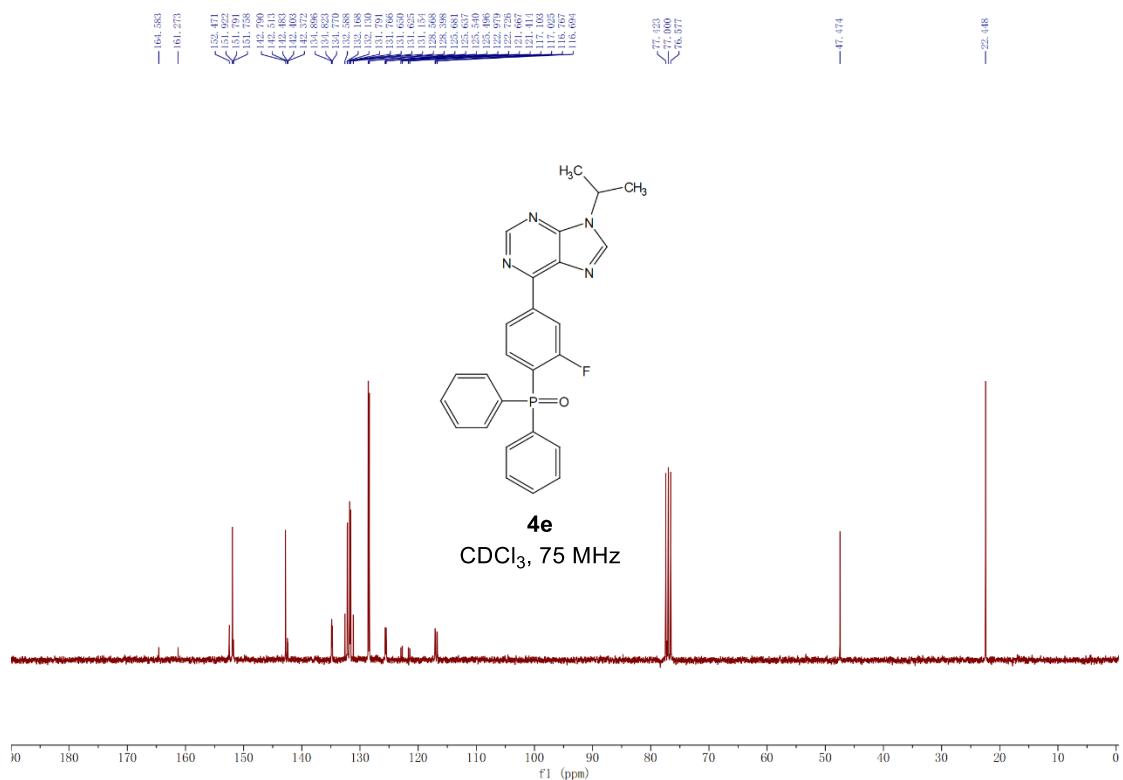



21.441

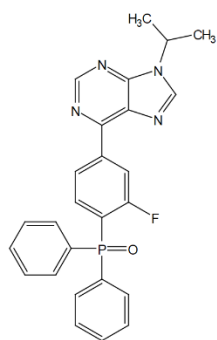

**4e**

CDCl<sub>3</sub>, 121 MHz

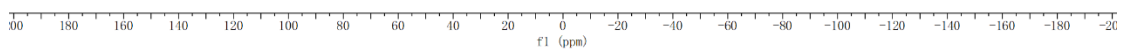

98.881

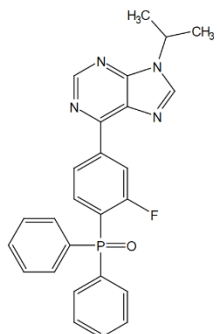

**4e**

CDCl<sub>3</sub>, 282 MHz

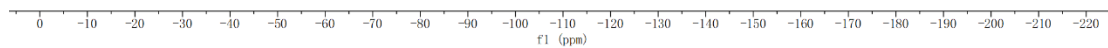

(4-(9-Isopropyl-9H-purin-6-yl)-2-methylphenyl)diphenylphosphine oxide (**4f**)

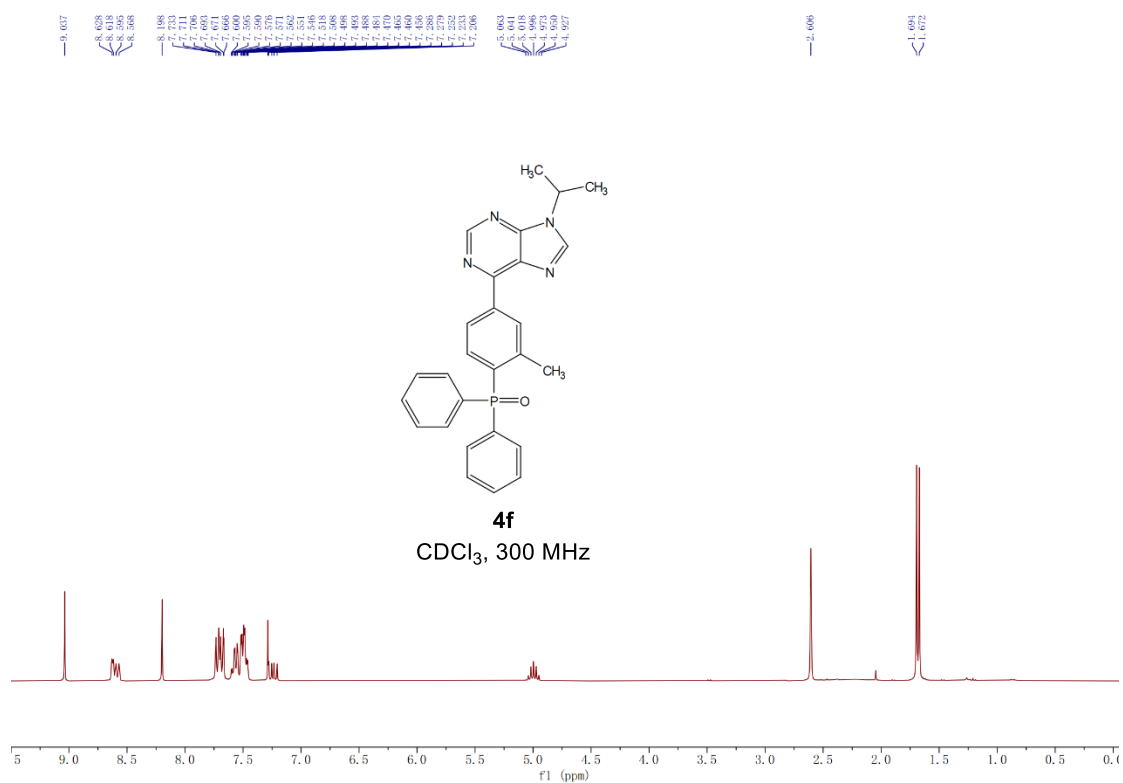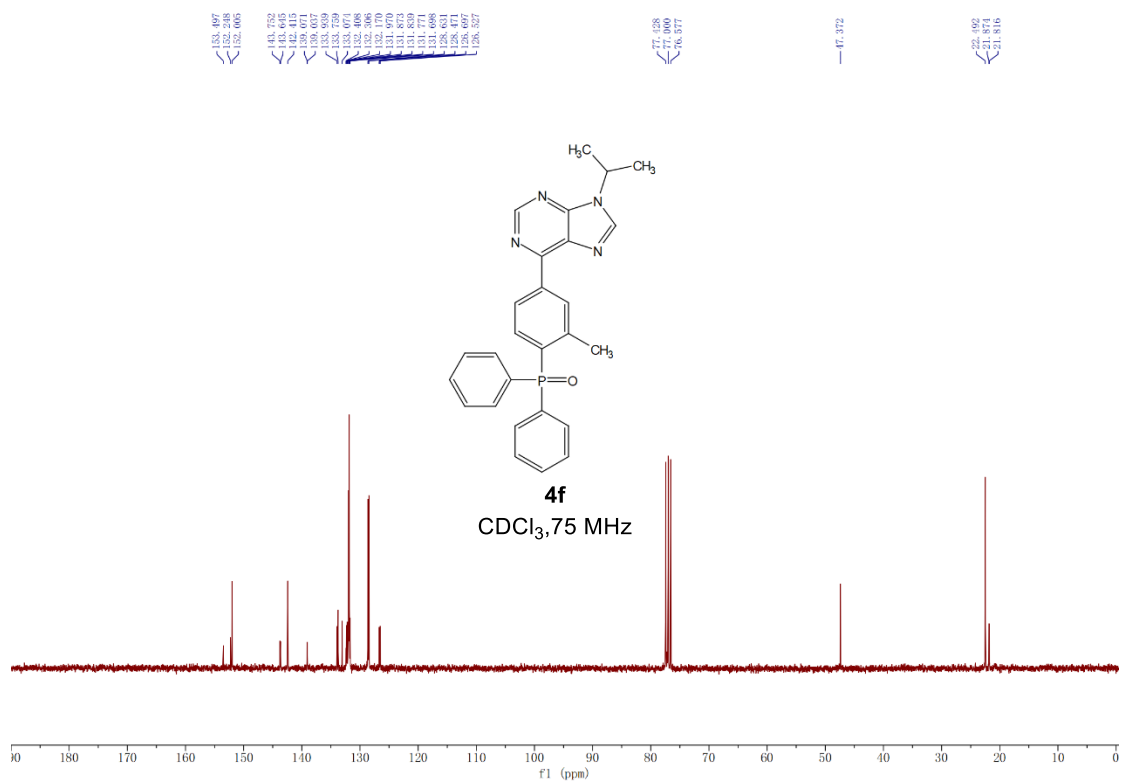

-31.589

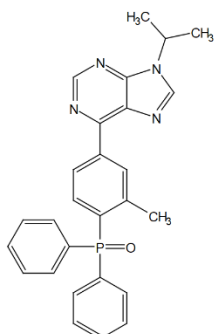

**4f**

CDCl<sub>3</sub>, 121 MHz

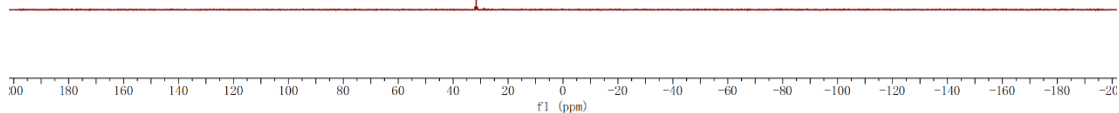

Bis(4-chlorophenyl)(4-(9-isopropyl-9H-purin-6-yl)phenyl)phosphine oxide (**4g**)

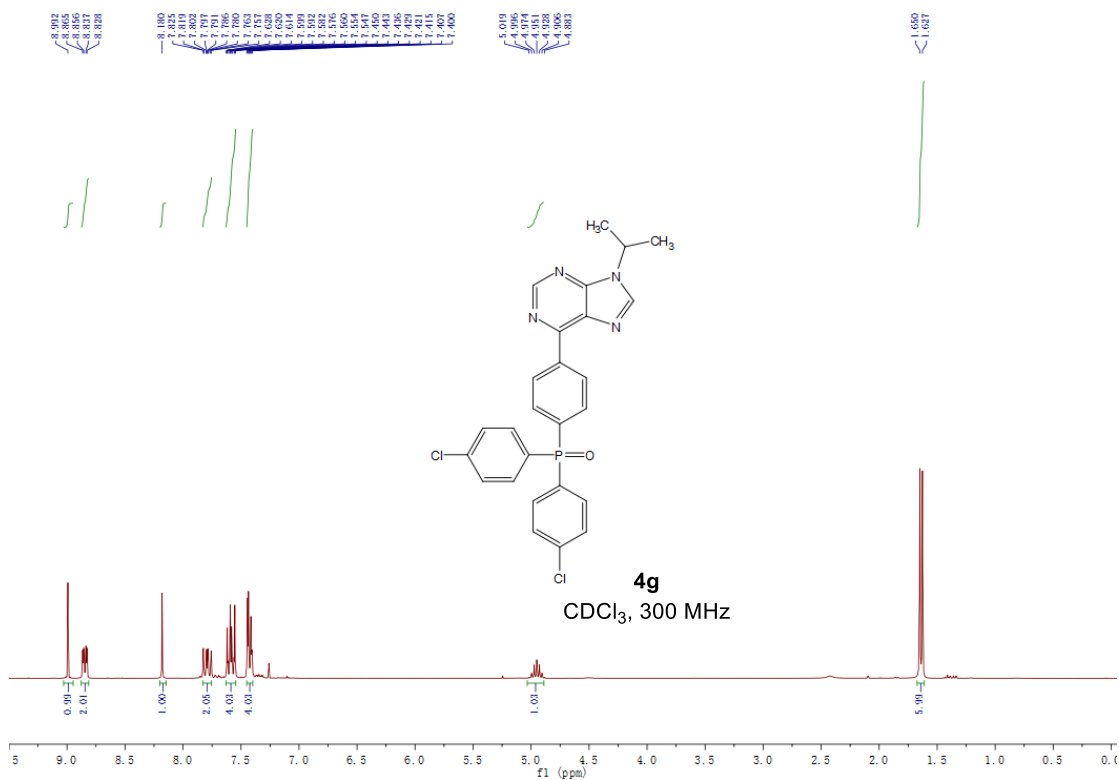

**4g**

CDCl<sub>3</sub>, 300 MHz

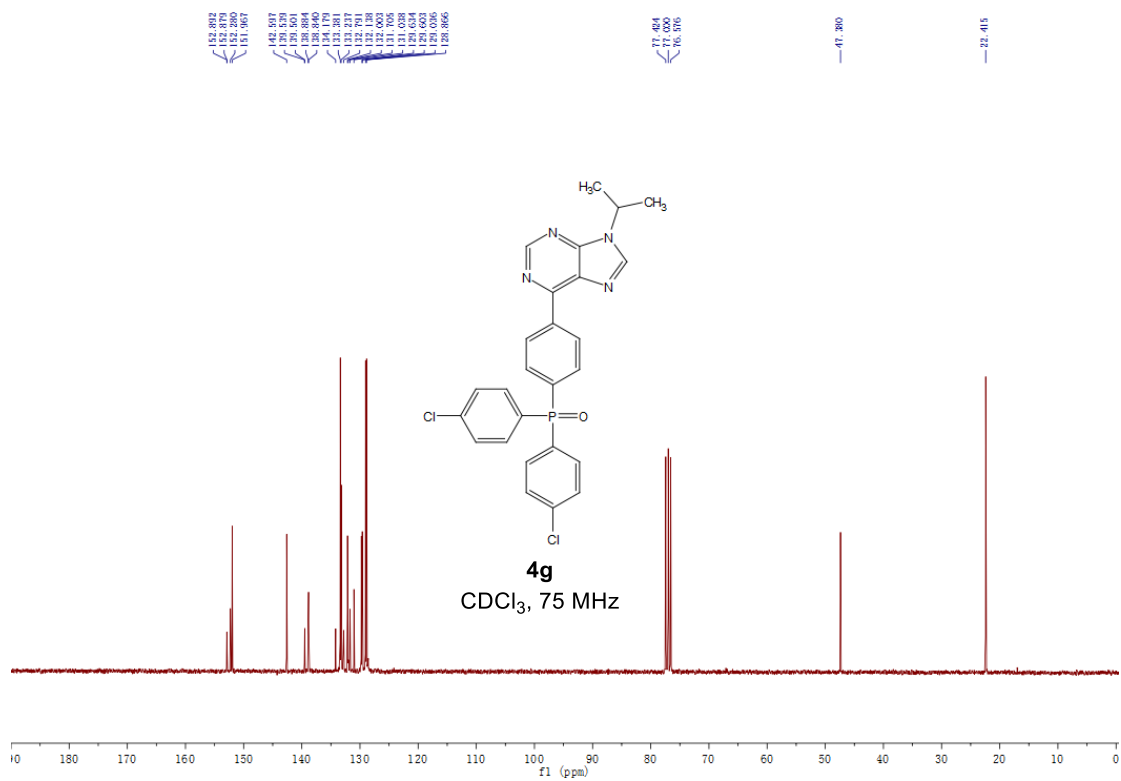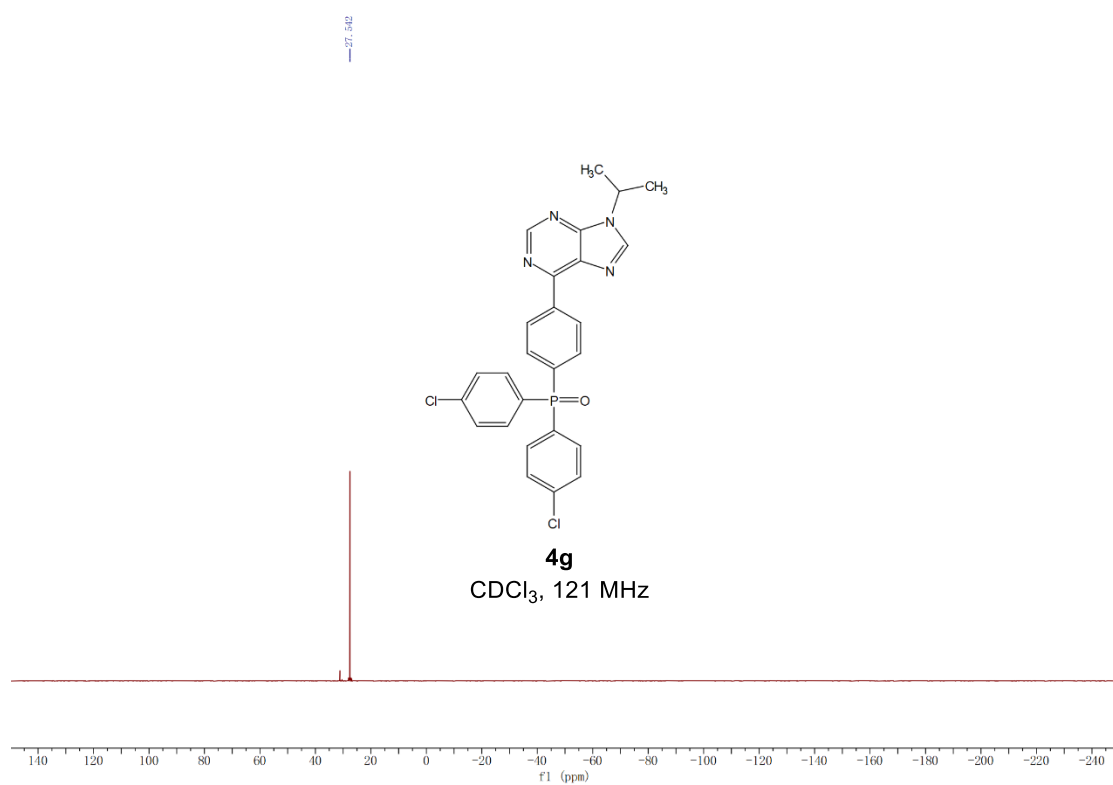

(4-(9-Isopropyl-9H-purin-6-yl)phenyl)di-p-tolylphosphine oxide (**4h**)

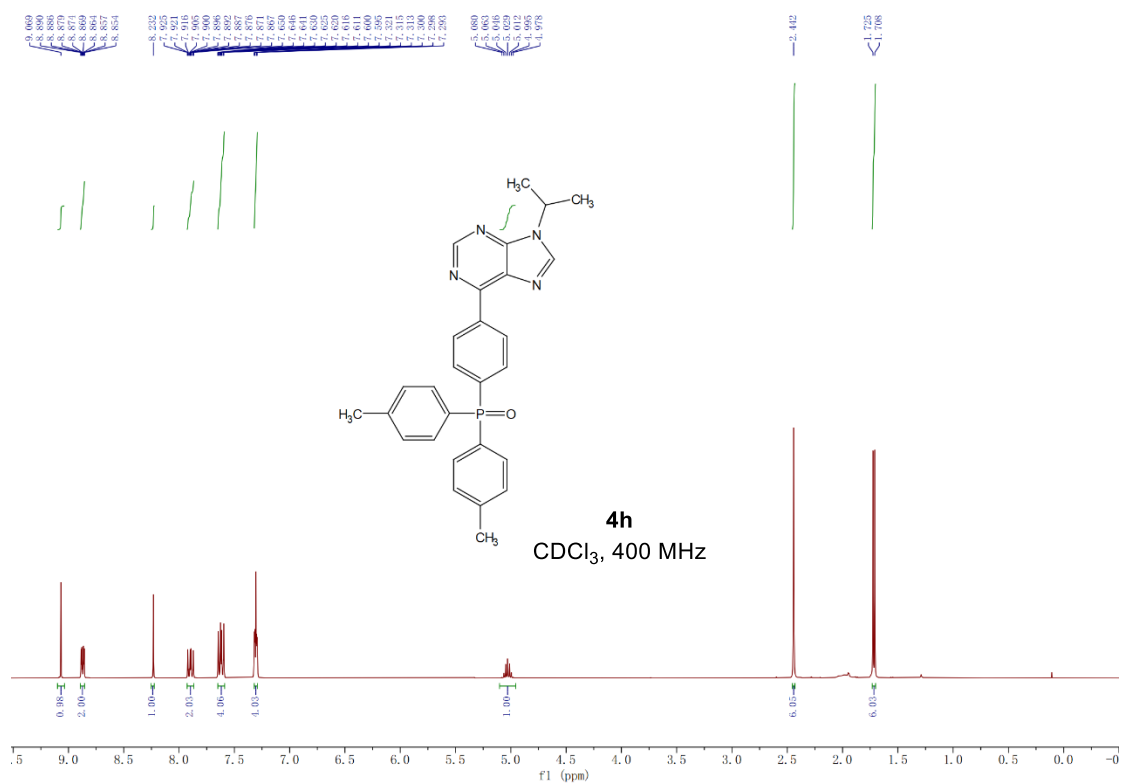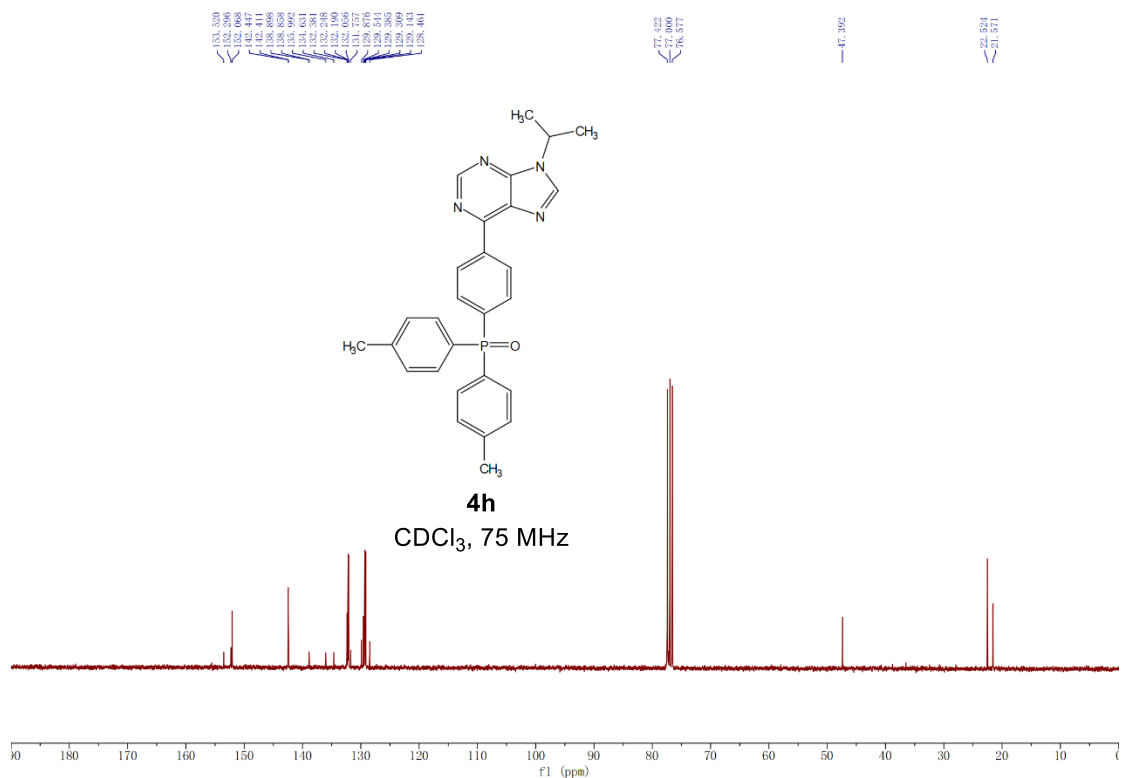

-20.155

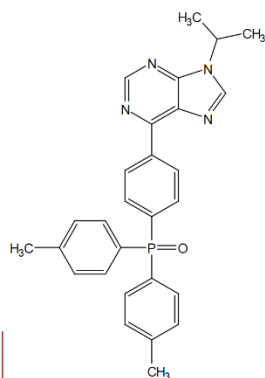

**4h**

CDCl<sub>3</sub>, 162 MHz

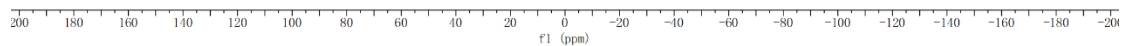

(4-(9-Isopropyl-9H-purin-6-yl)phenyl)bis(4-methoxyphenyl)phosphine oxide (**4i**)

8.991  
8.987  
8.816  
8.797  
8.788

7.910  
7.850  
7.824  
7.785  
7.611  
7.585  
7.573  
7.545

6.947  
6.940  
6.913

5.007  
4.968  
4.945  
4.932  
4.878

3.803  
3.758

1.654  
1.622

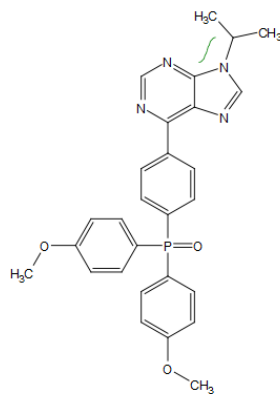

**4i**

CDCl<sub>3</sub>, 300 MHz

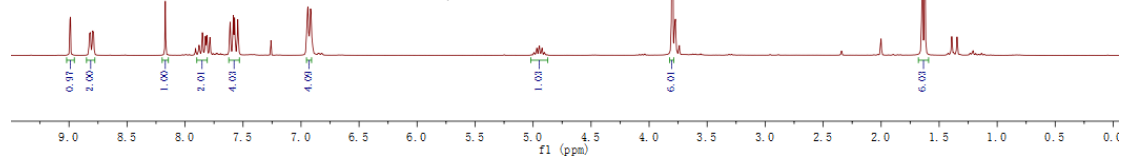

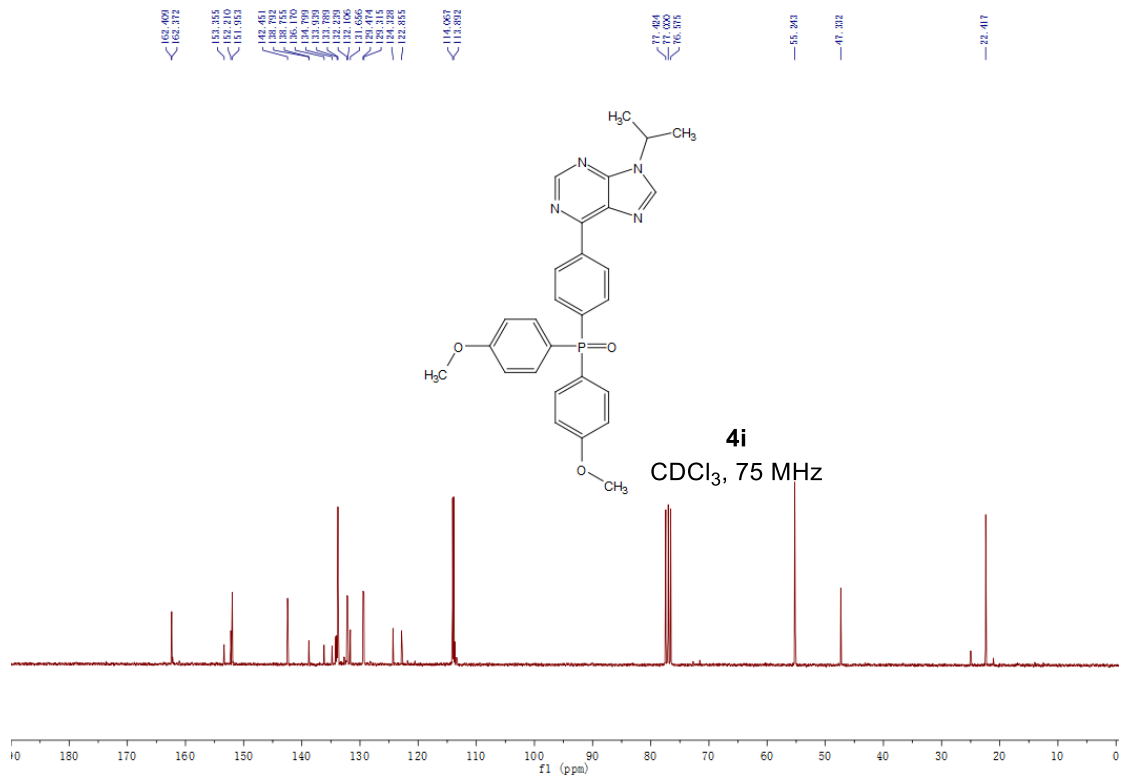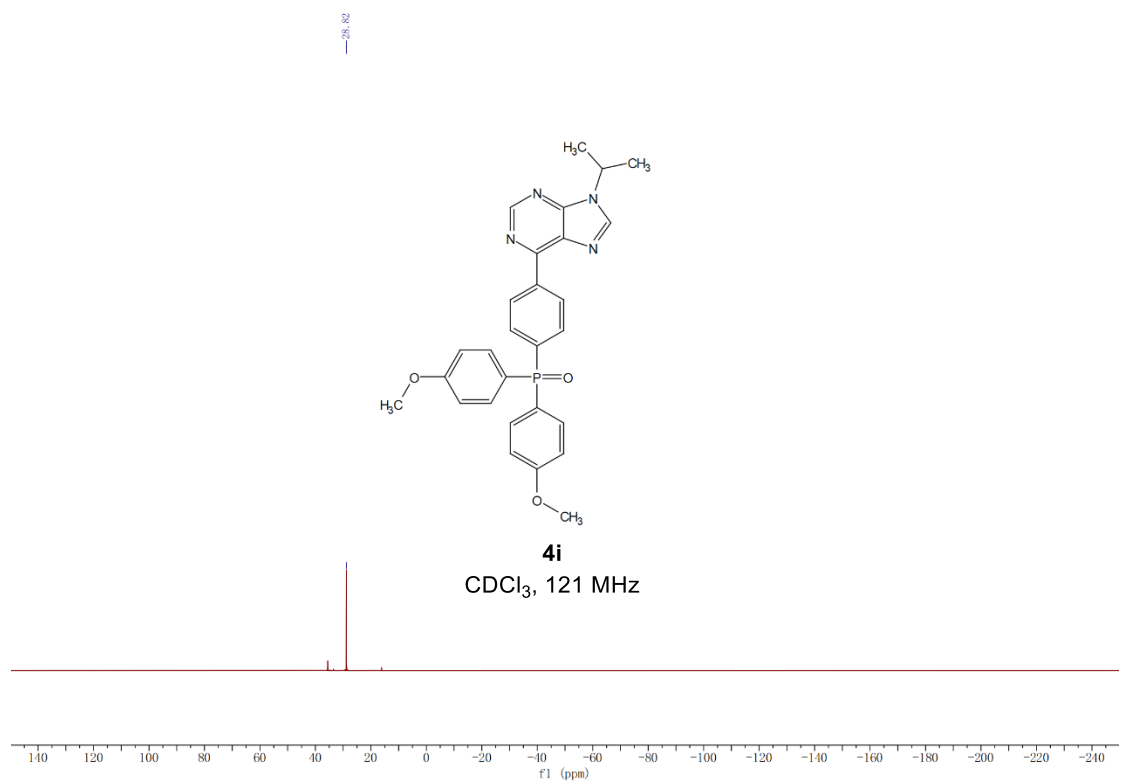

(4-(9-Isopropyl-9H-purin-6-yl)phenyl)bis(4-(trifluoromethoxy)phenyl)phosphine oxide (**4j**)

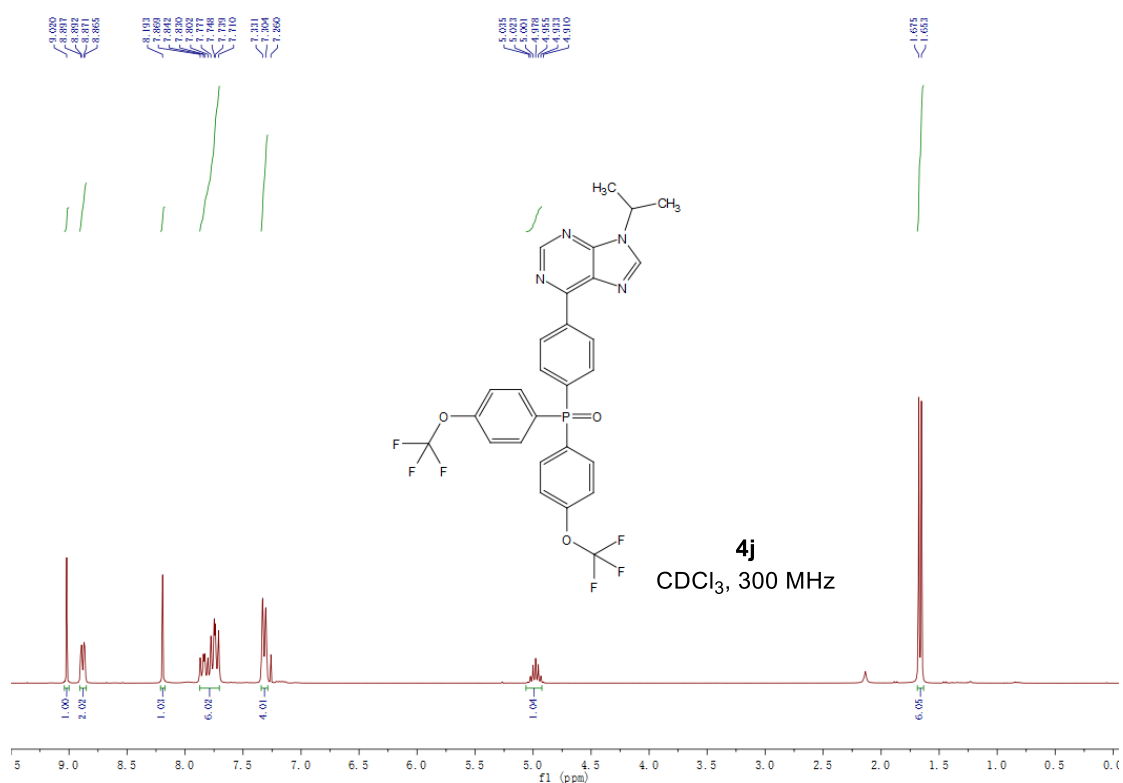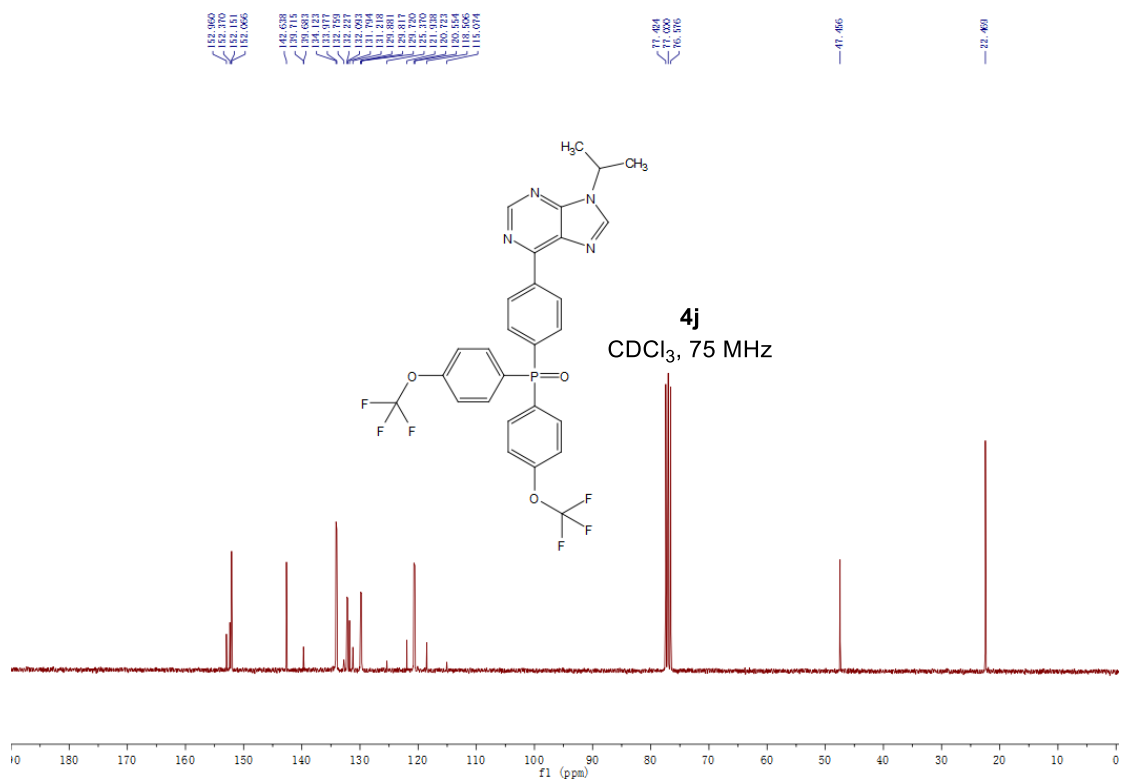



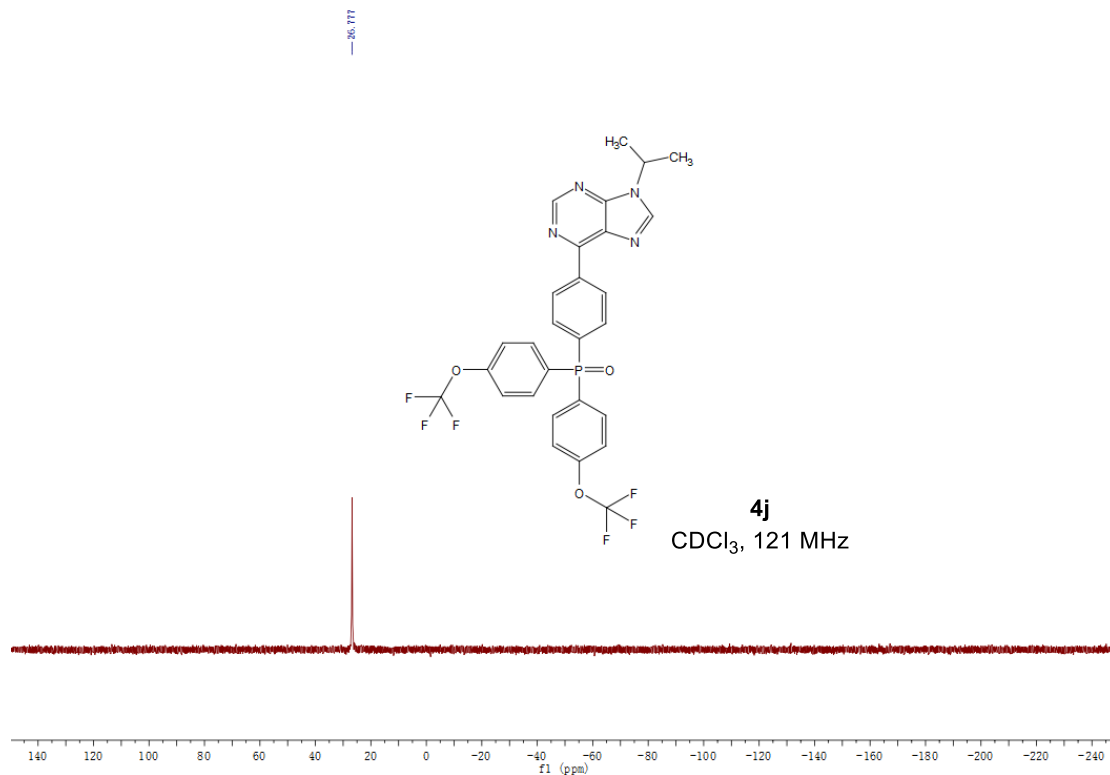

Bis(3,5-dimethylphenyl)(4-(9-isopropyl-9H-purin-6-yl)phenyl)phosphine oxide (**4k**)

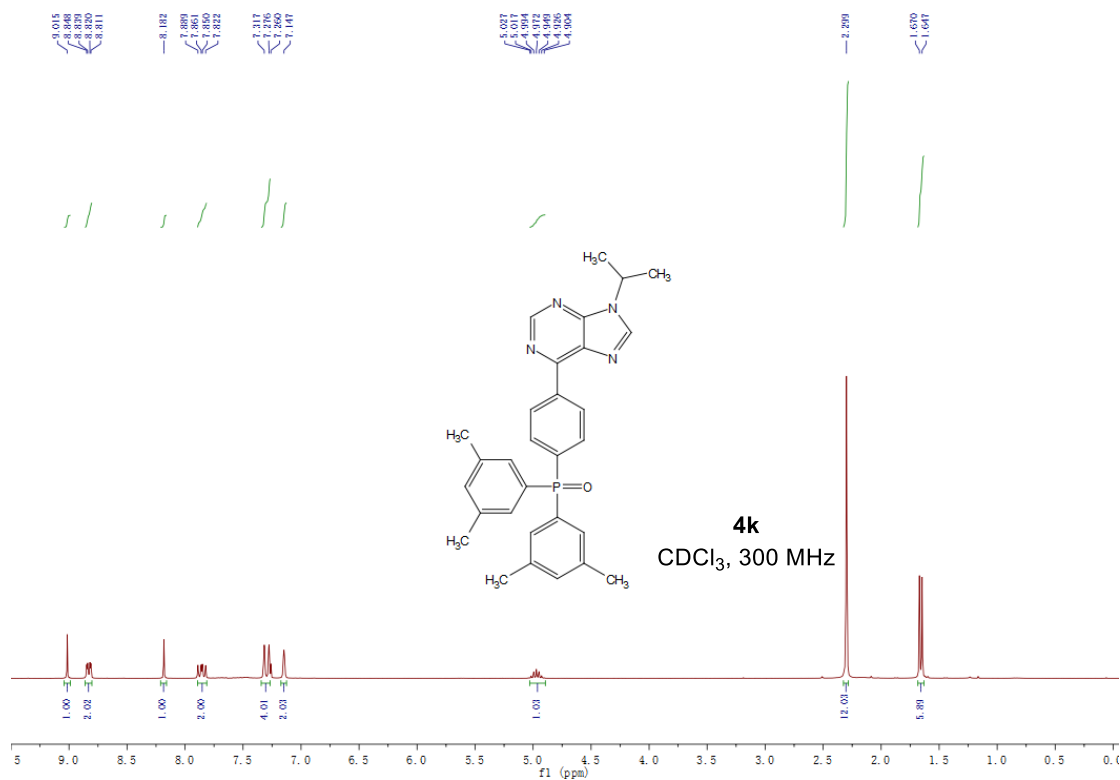

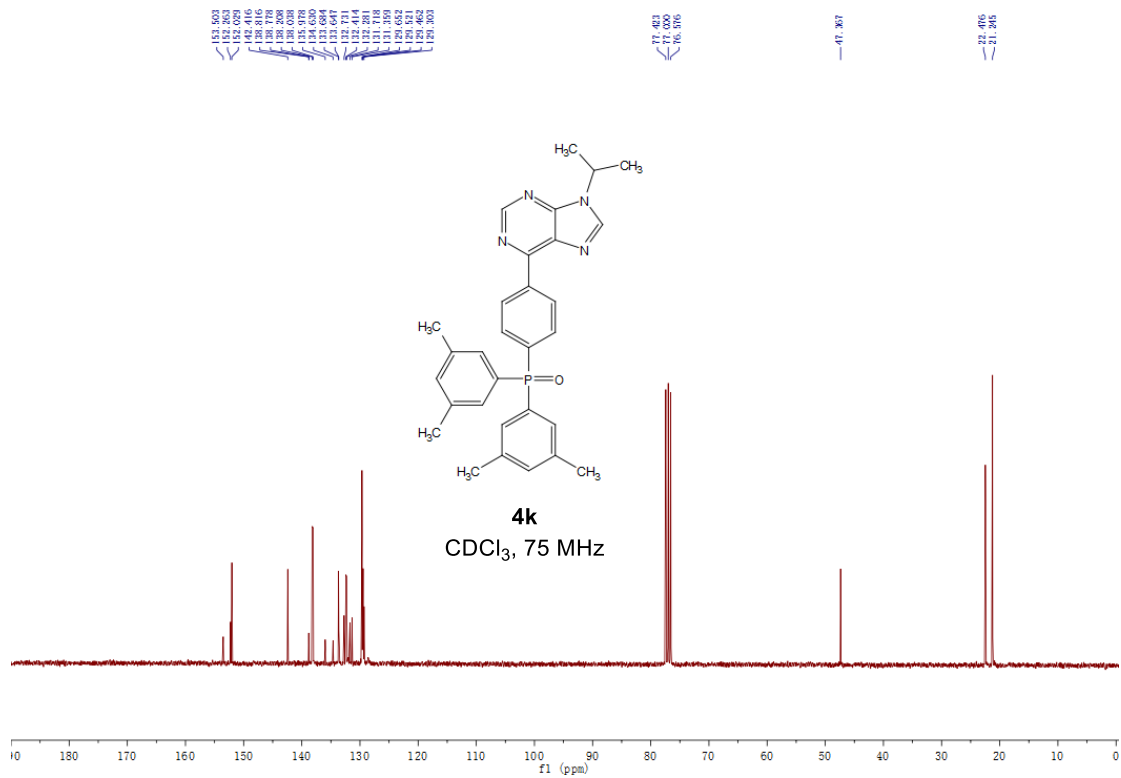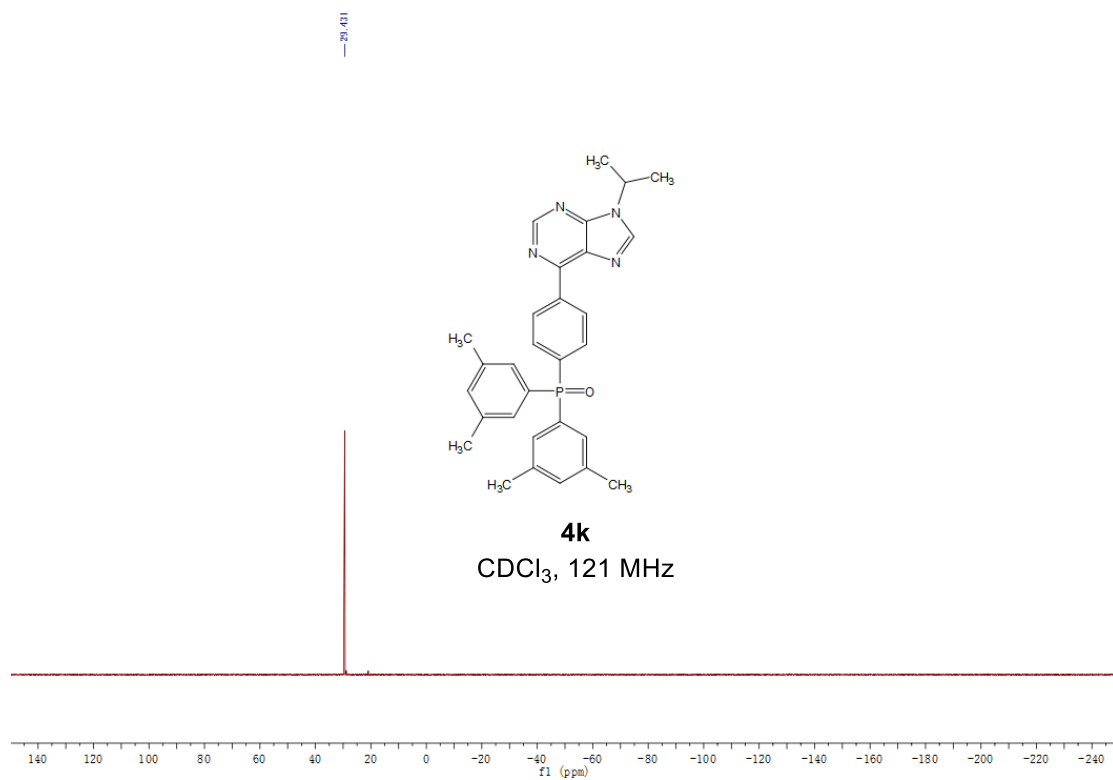

(E)-4-(1-(Methoxyimino)ethyl)phenyl)diphenylphosphine oxide (**4I**)

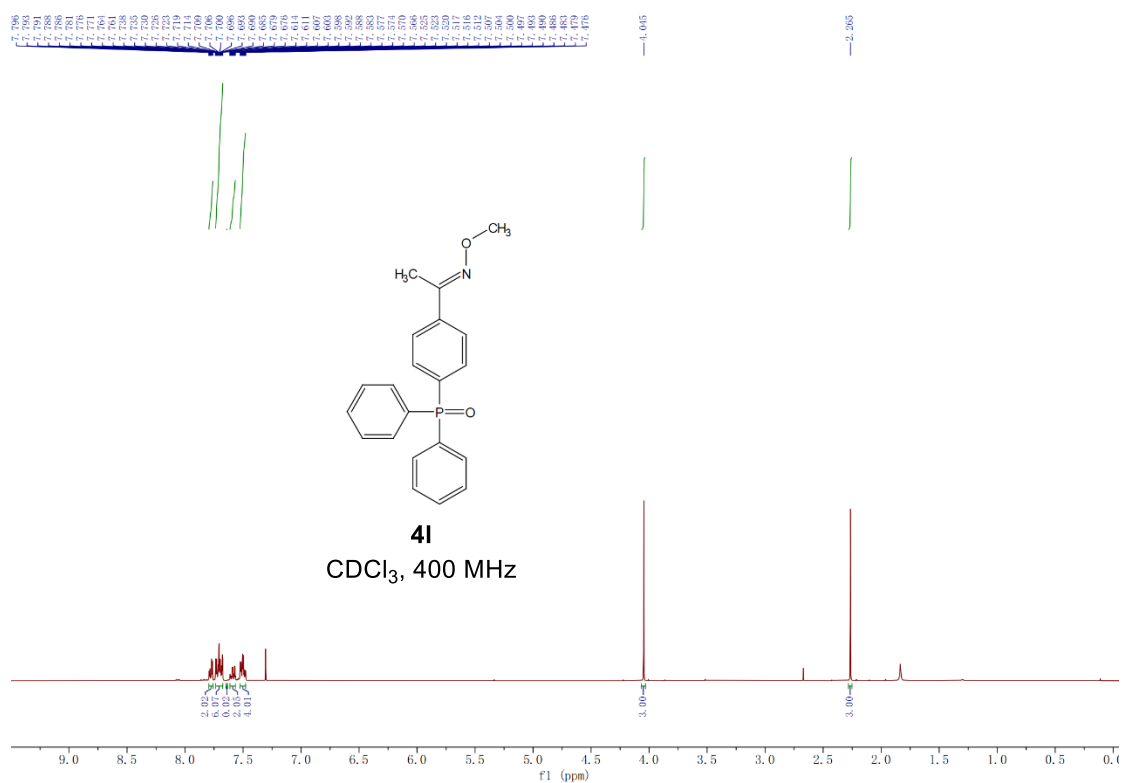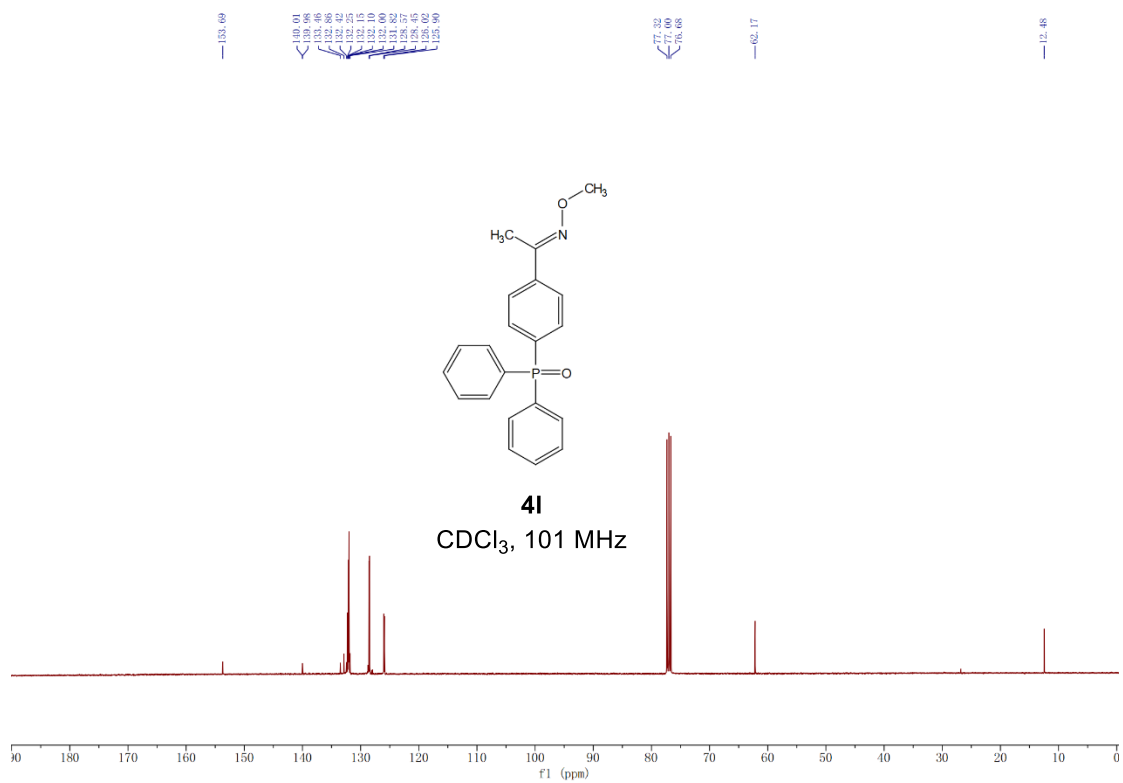

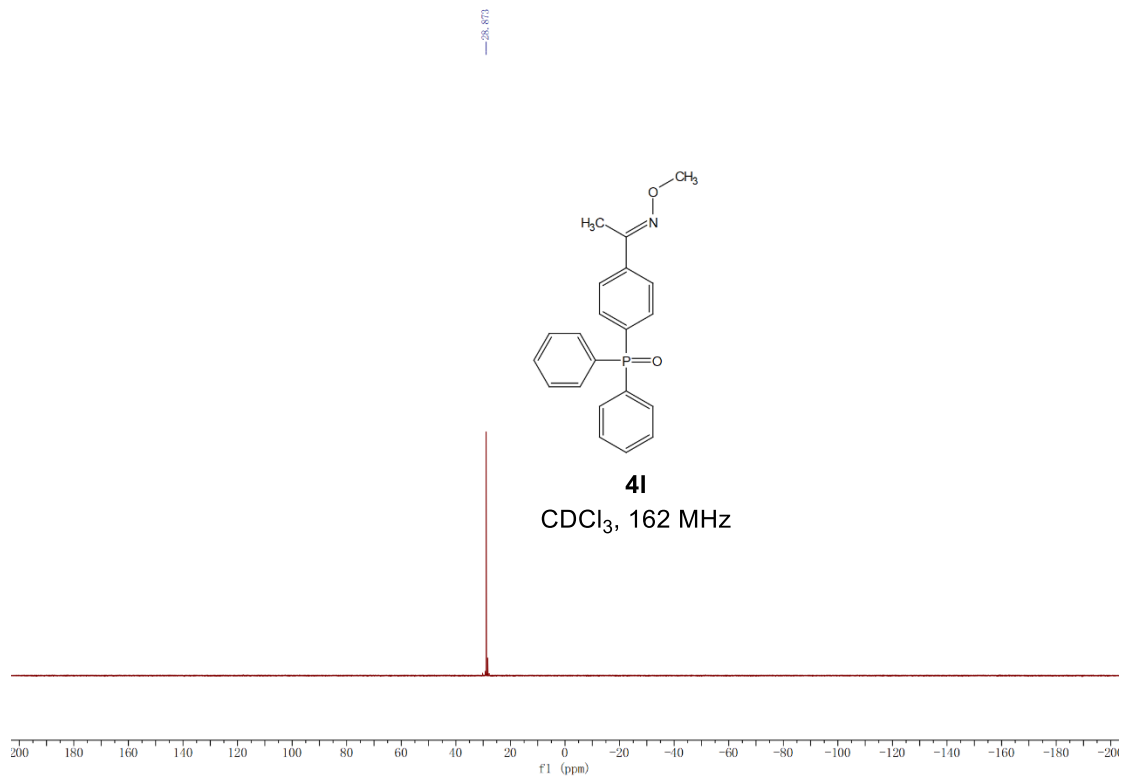

(4-(1H-pyrazol-1-yl)phenyl)diphenylphosphine oxide (**4m**)

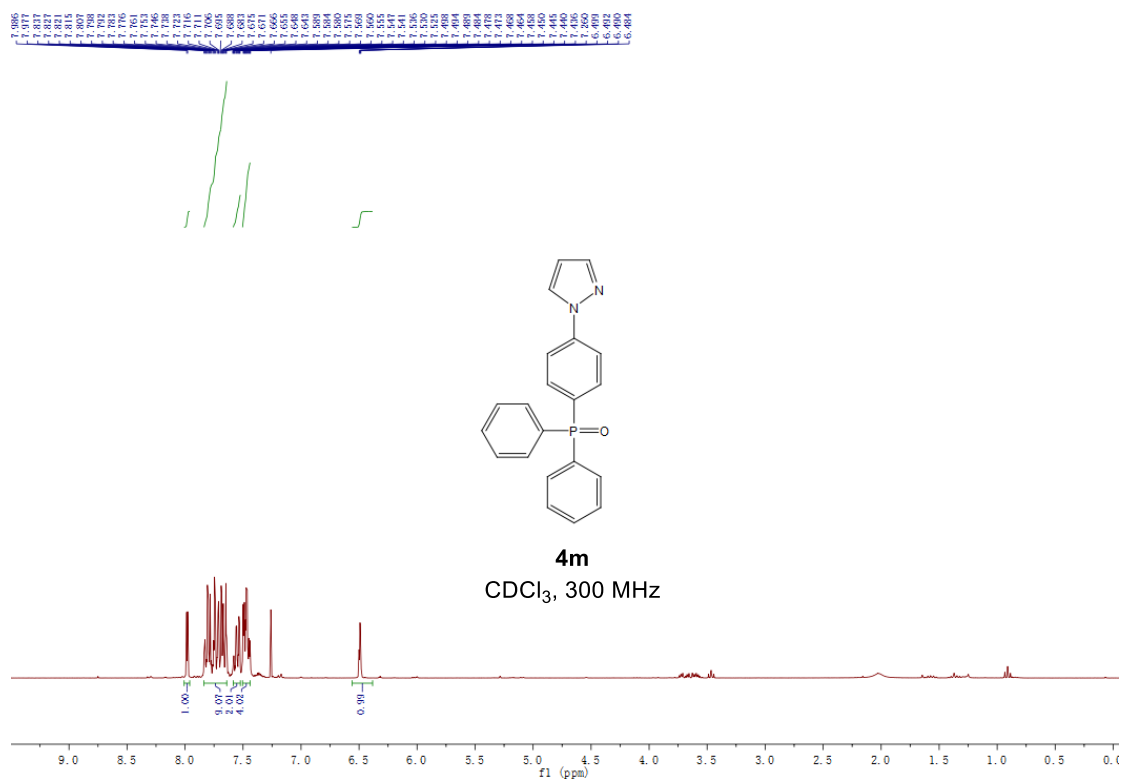

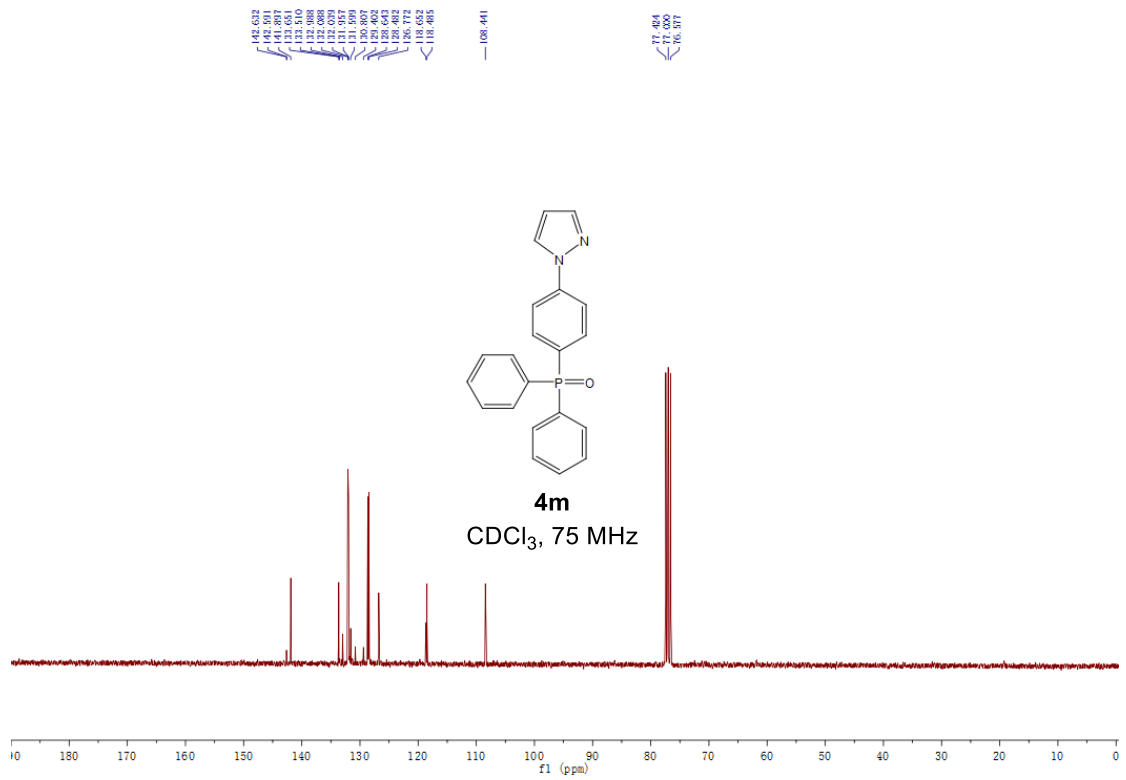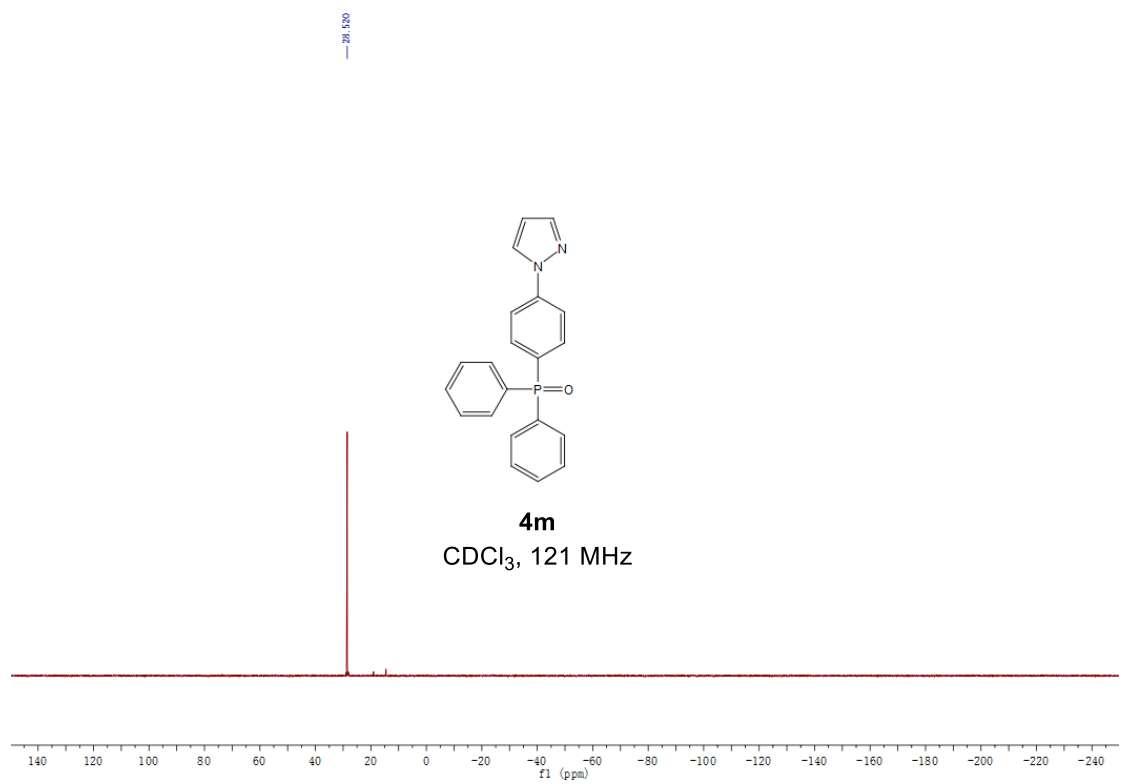

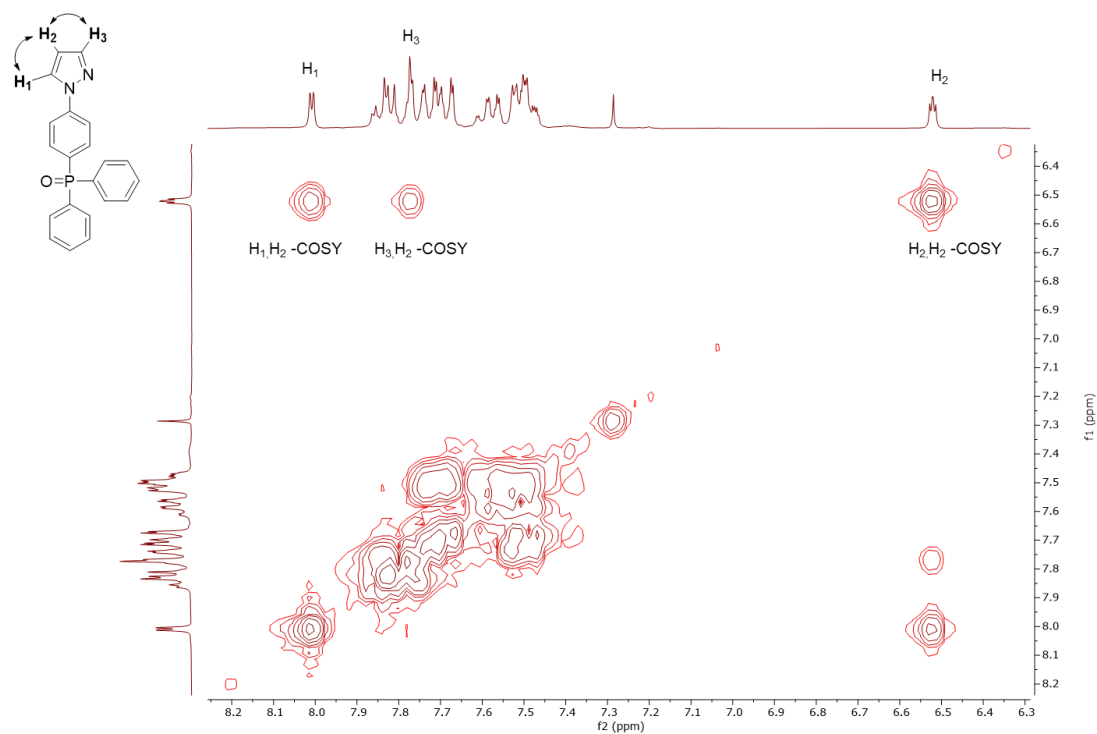

(4-(4,4-Dimethyl-4,5-dihydrooxazol-2-yl)phenyl)diphenylphosphine oxide (**4n**)

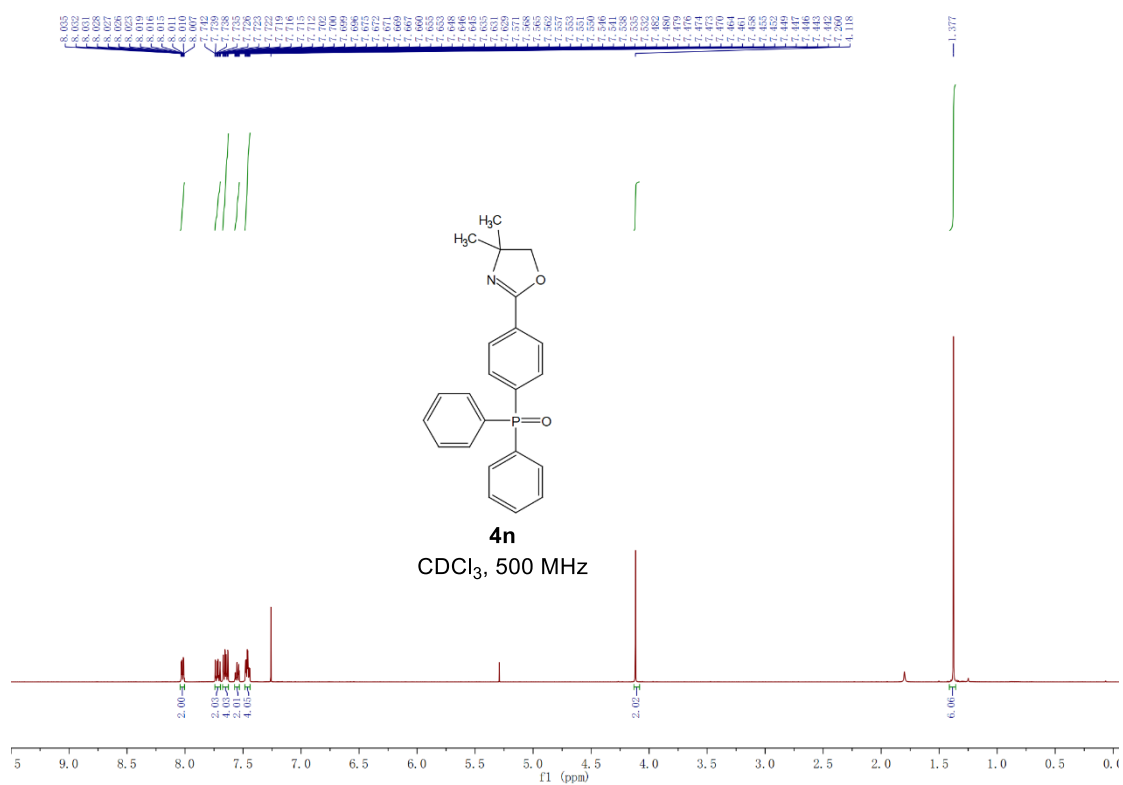

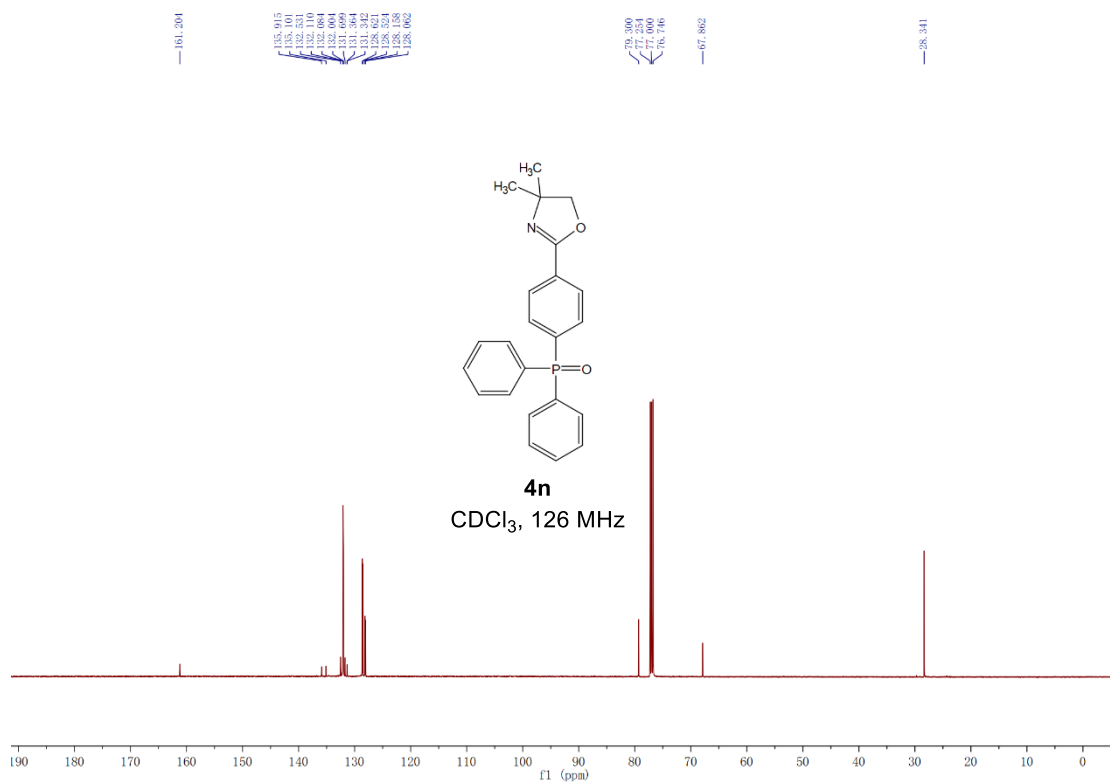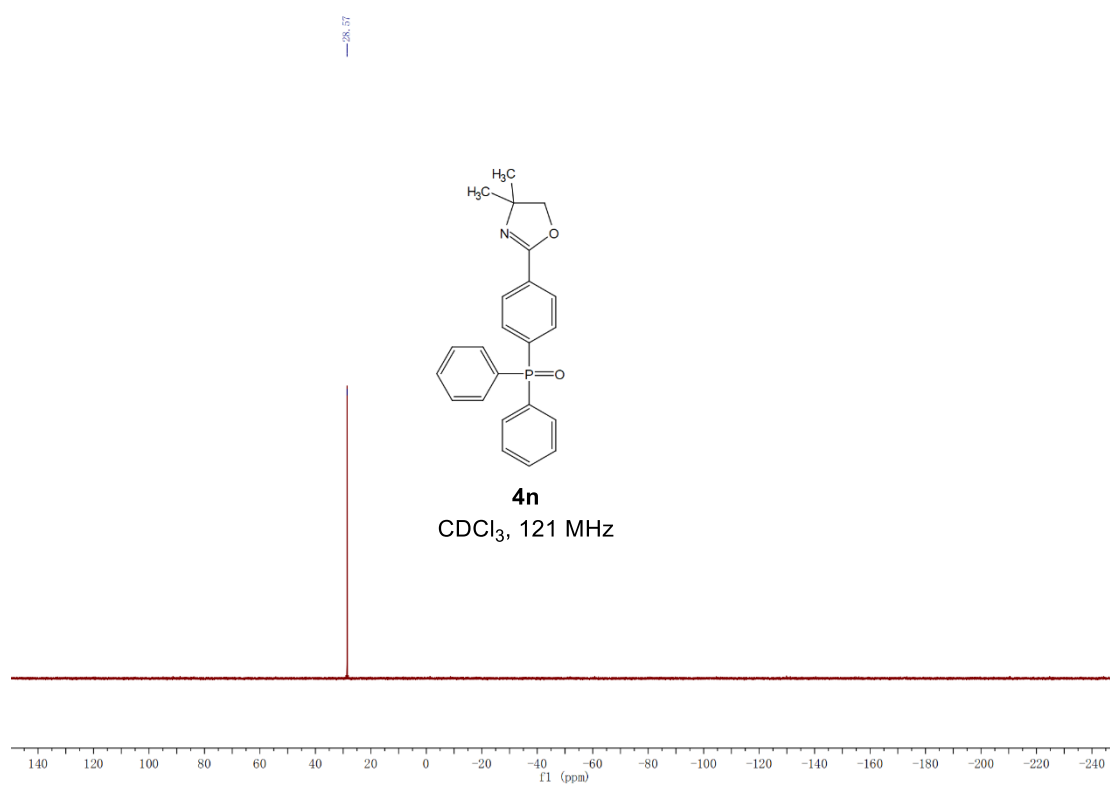

Diphenyl(4-(pyridin-2-yl)phenyl)phosphine oxide (**4o**)

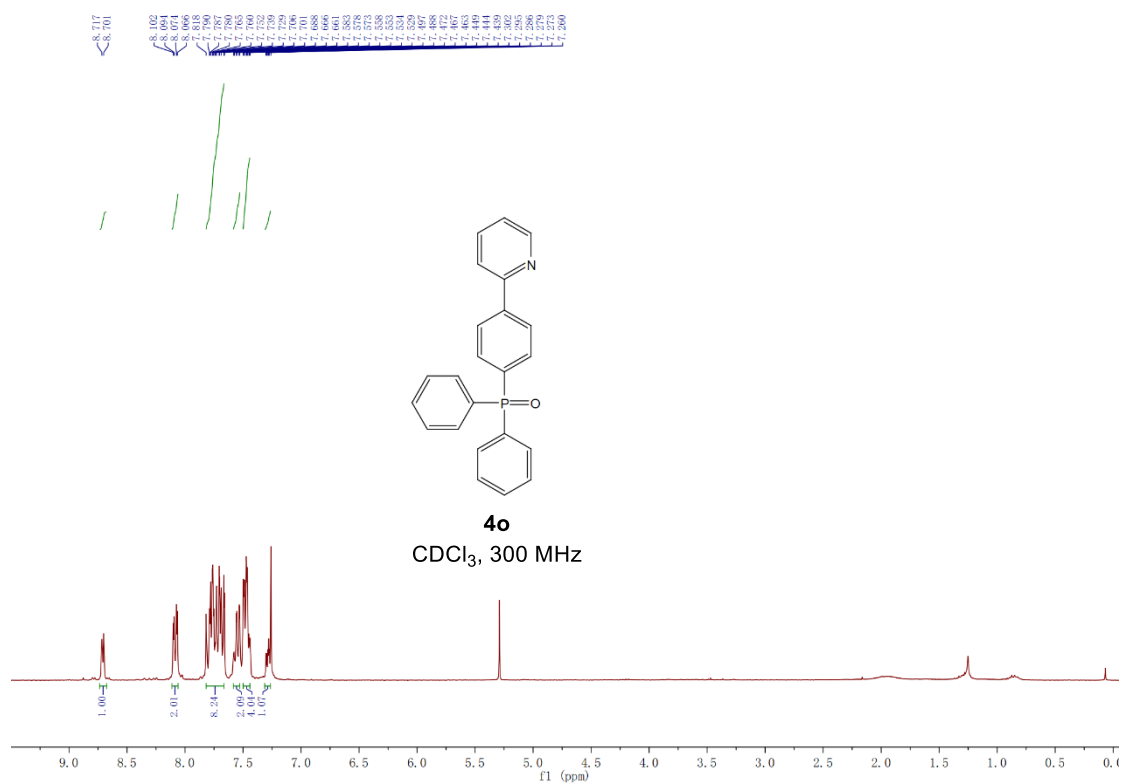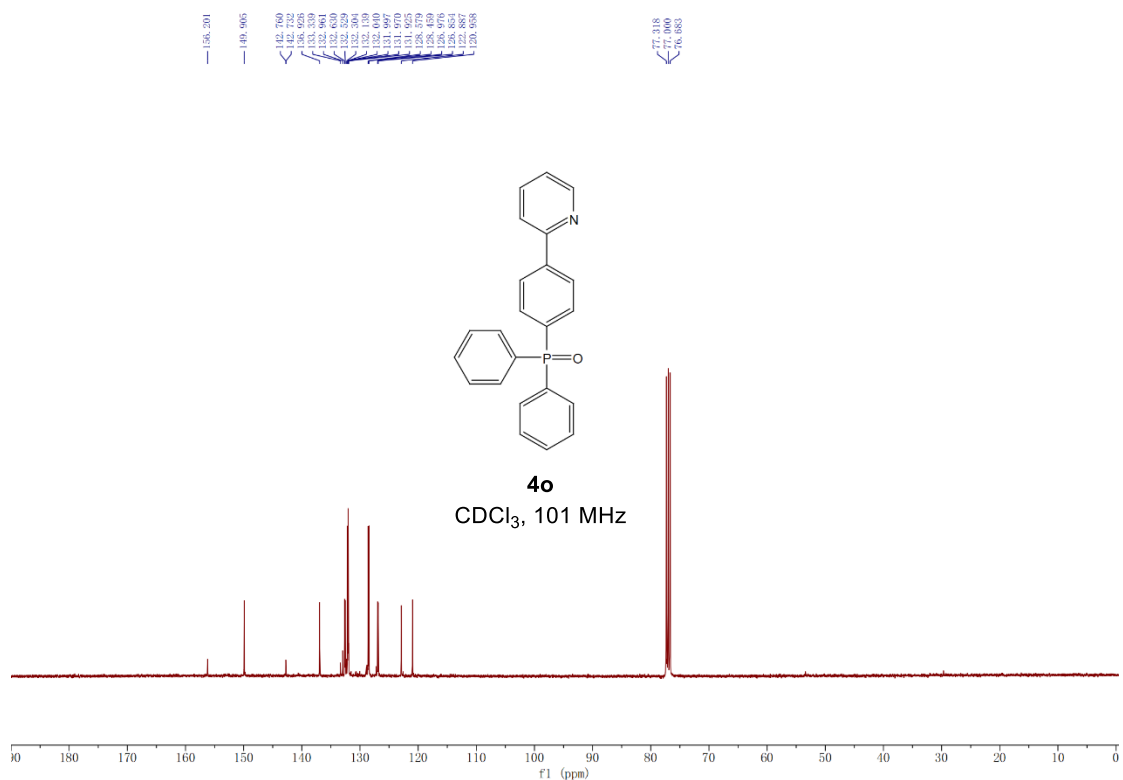



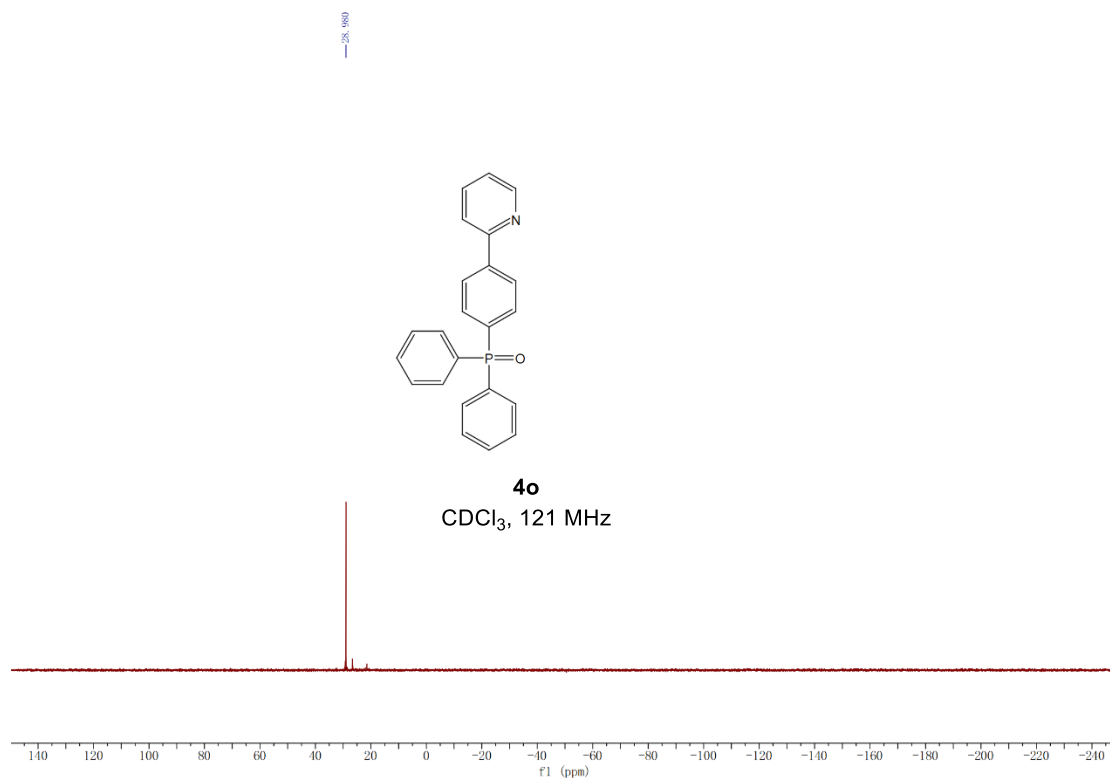

(4-(5-Methylpyrimidin-2-yl)phenyl)diphenylphosphine oxide (**4p**)

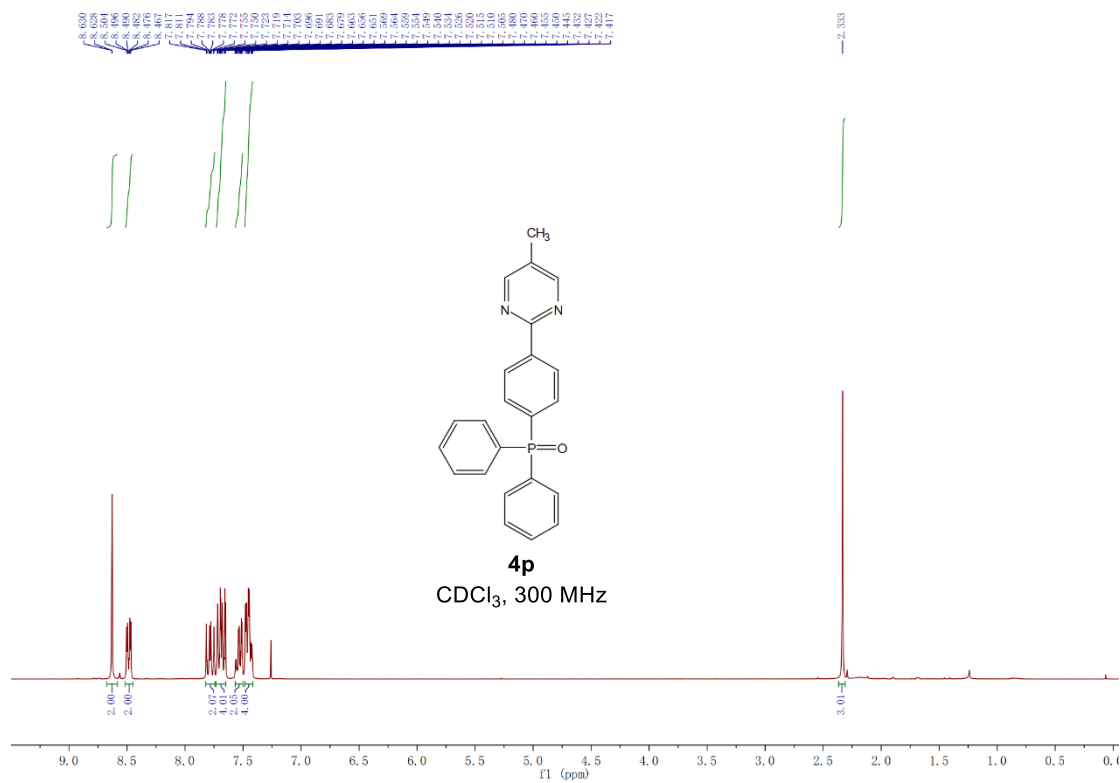

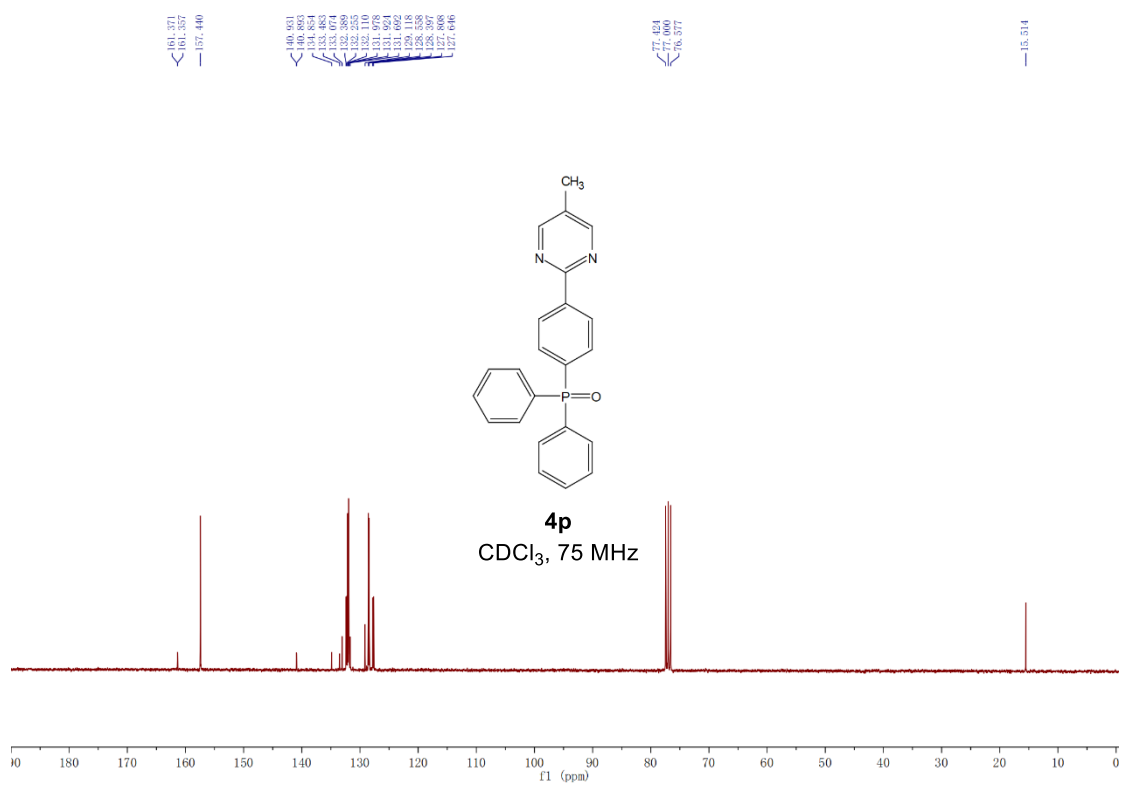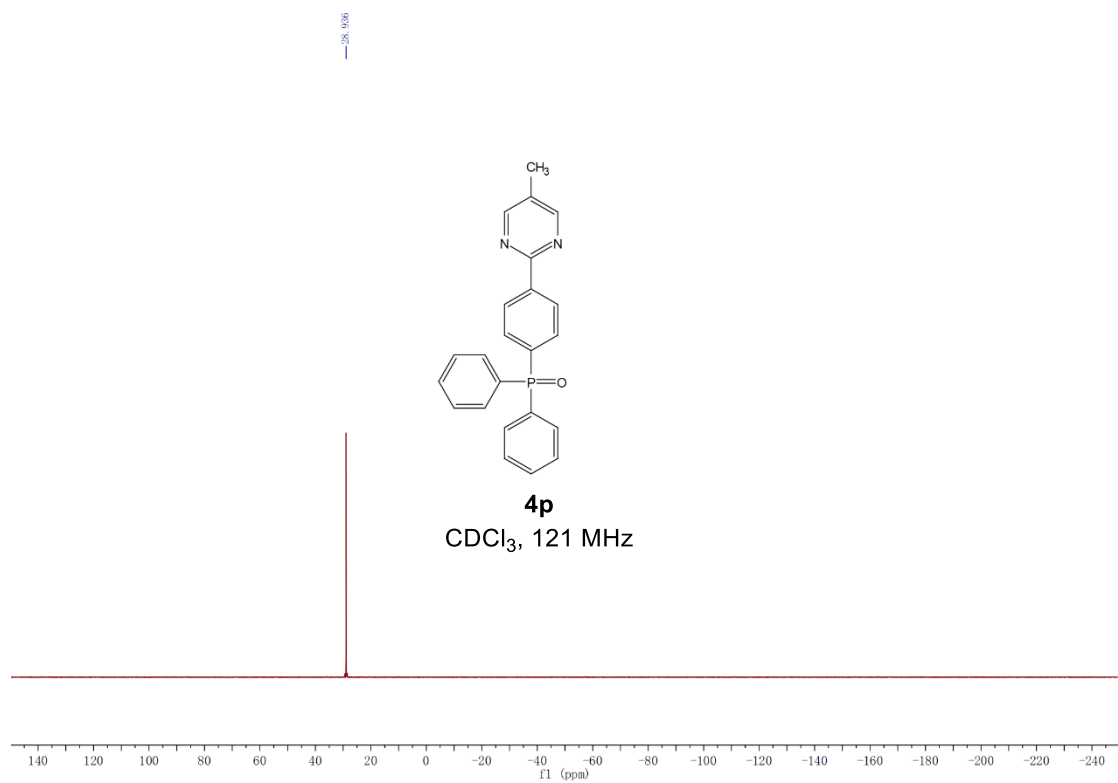

(4-(2-Methyl-2H-tetrazol-5-yl)phenyl)diphenylphosphine oxide (**4q**)

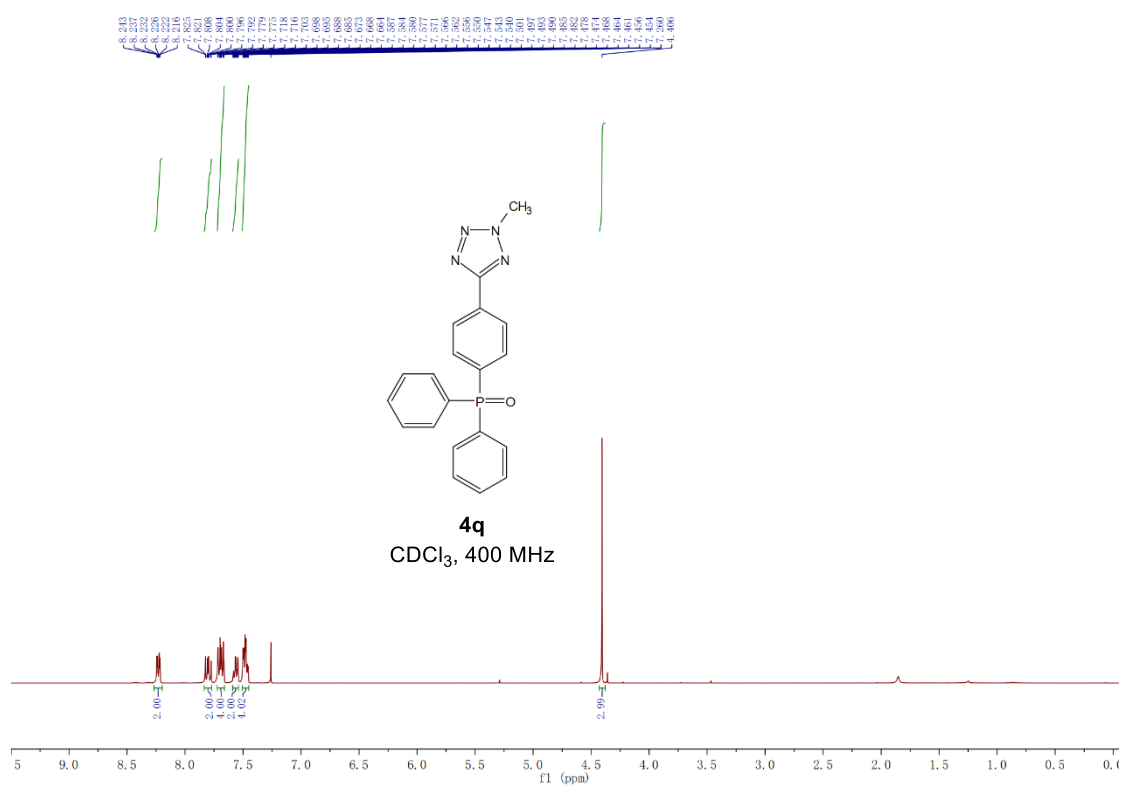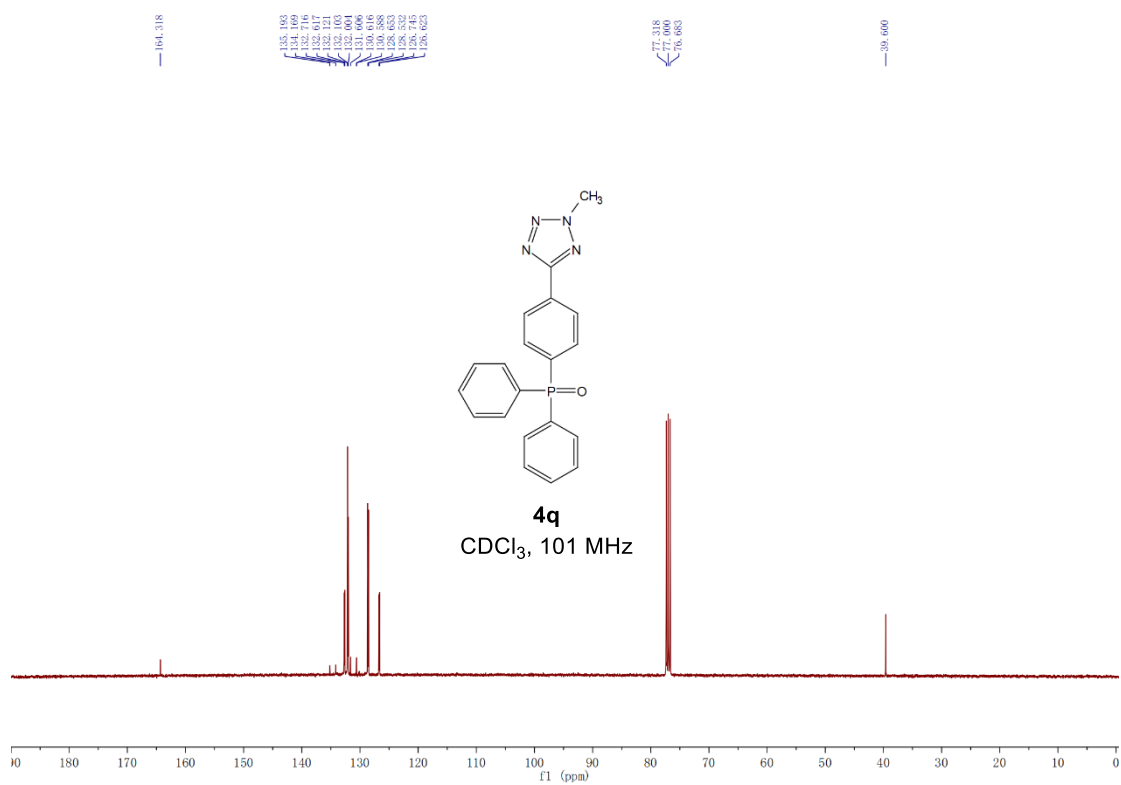

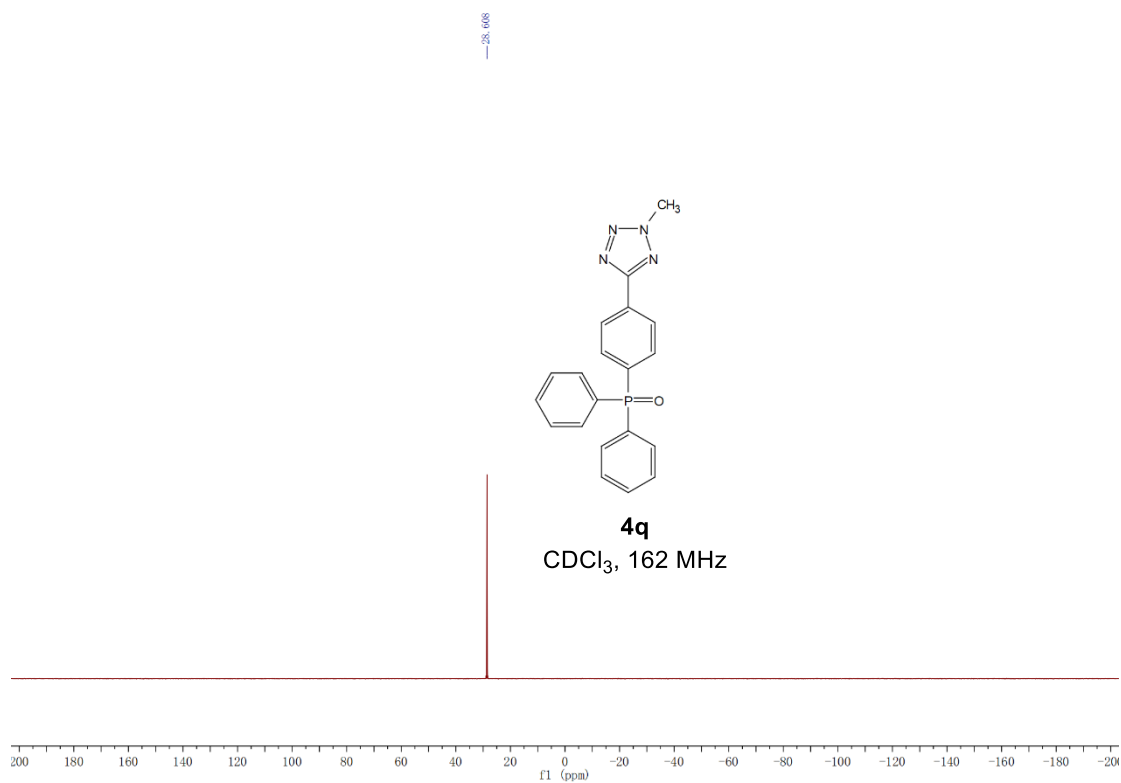

(4-(9-((3aR,4R,6R,6aR)-6-(Hydroxymethyl)-2,2-dimethyltetrahydrofuro[3,4-d][1,3]dioxol-4-yl)-9H-purin-6-yl)phenyl)diphenylphosphine oxide (**4r**)

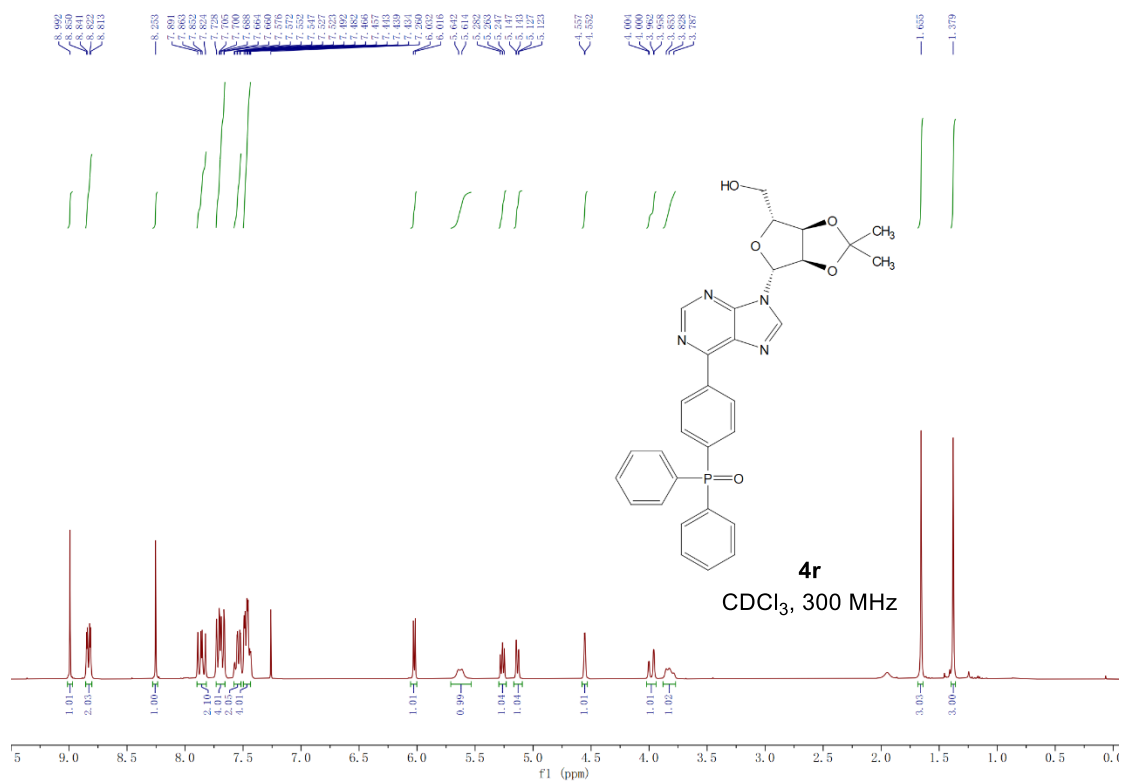

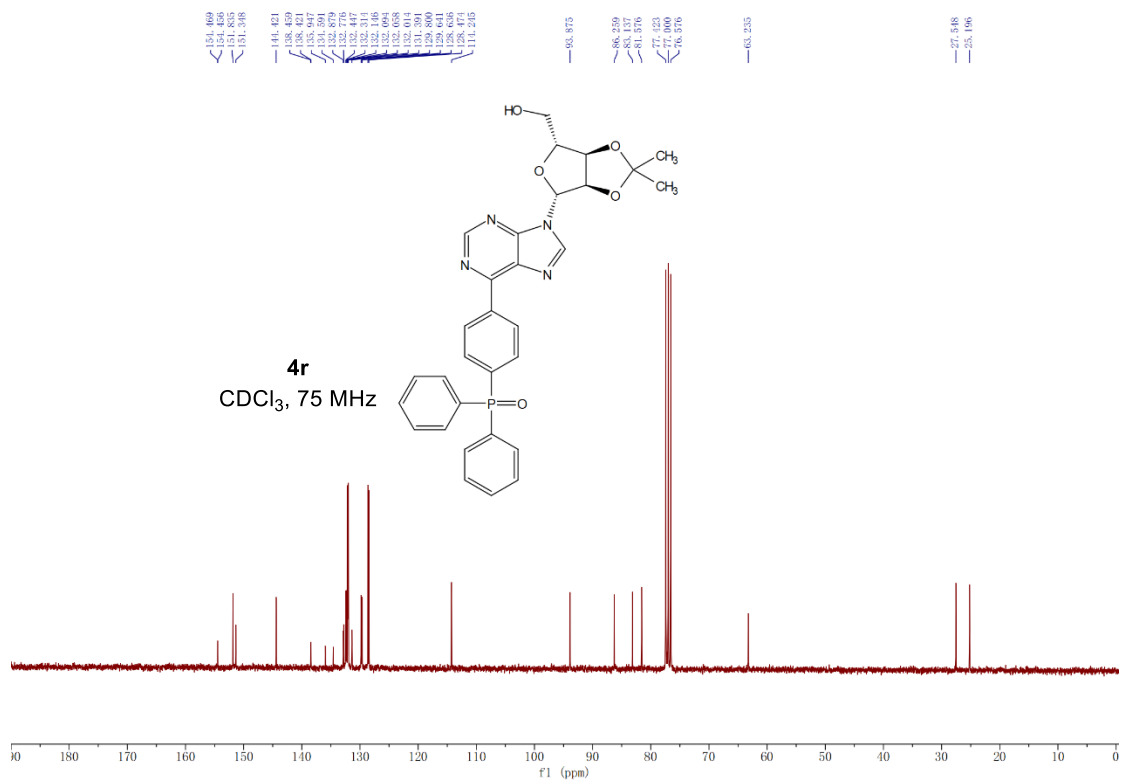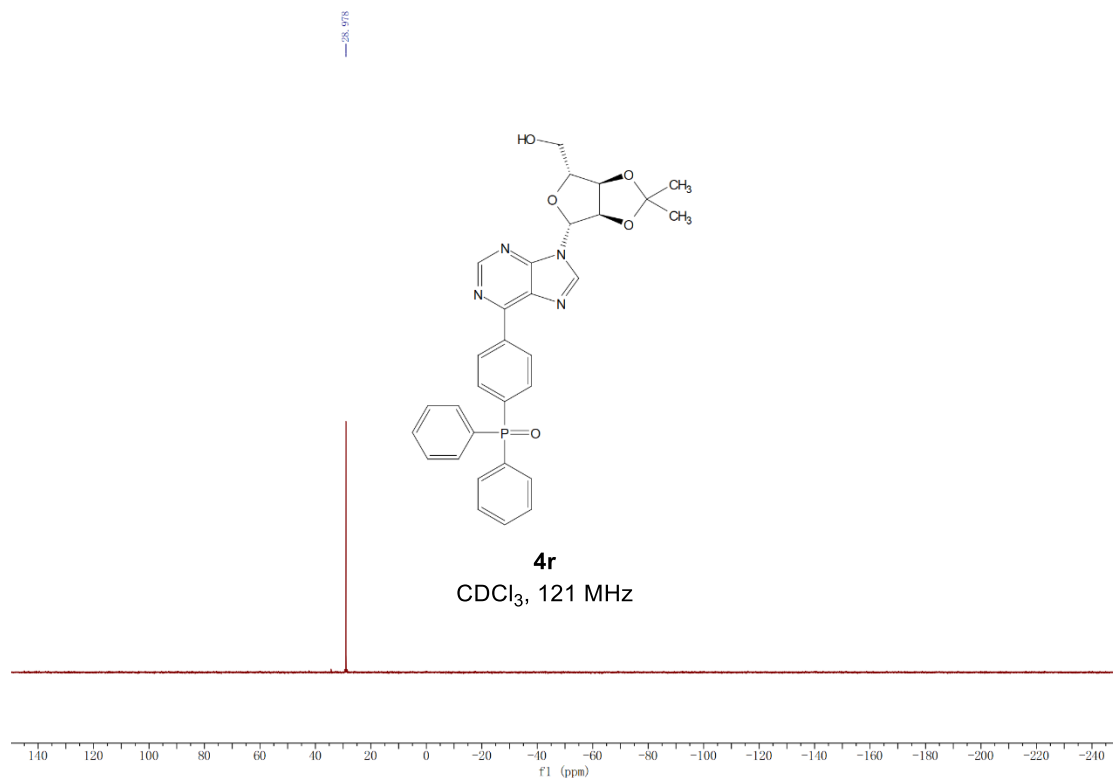

Supplement: SC-OLF-D4SC06219A-s001.pdf [file SC-OLF-D4SC06219A-s001.pdf]
